# Supplementary material
Source: Research Square preprint supplement (doi:10.21203/rs.3.rs-8918389/v1)

# PREVENT\_FT\_QUESTIONNAIRE

## INTRODUCTION

PREVENTFTQUESTIONNAIRE - v1

---

### Is this a new SSP household or revisited household?

Note:

A new SSP household is a household you are selling VDOCs for the first time under PREVENT project arrangement.

Revisited SSP household is a household you are revisiting again after a period of time but under PREVENT project arrangement.

- New household
- Revisited household

## LOCATION DETAILS

Select region name where the household is located

---

---

Select district name where the household is located

---

---

Select village/ street name where the household is located

---

---

FT: Is the interview conducted at the SSP farm/household?

- Yes
- No

Can we proceed?

This conversation will only take 10 minutes of your time.

bought and enable us to improve the services we deliver to you and other households.

management. Your answers will help us to get an understating of the progress you are making with the VDOCs you

I would like to ask you some questions about chickens that you keep, and few other questions related to chickens

Hello my name is \_\_\_\_\_. Thank you for the opportunity to speak with me.

Yes

No

Hello my name is \_\_. Thank you for the opportunity to speak with me.

I would like to ask you some questions about chickens that you keep, and few other questions related to chickens management. Your answers will help us to get an understating of the progress you are making with the VDOCs you bought and enable us to improve the services we deliver to you and other households.

This conversation will only take 10 minutes of your time.

Can we proceed?

Yes

No

#### FT READ OUT

: I would like to start by asking you questions about your household. By household I mean one or more people sleeping under the same roof or within the same compound and sharing resources together, typically, their food or money.

Note, households can be one person only e.g. a teacher in a teacher house or a single person household. Also note that members of a household recognize one and the same person as the head of the household.

HOUSEHOLD MEMBERS must have been part of the household for more than half of the time in the past 3 months or anyone recently born or married into the household.

Is this clear?

Yes

No

**FT READ OUT**

: Now thinking about your household, I would like you to provide me the names of all adult members who are involved in activities related to the household chicken. This could be feeding, cleaning, sweeping, identifying sick chickens, selling and marketing poultry products, making veterinary decisions, etc. Please start with the main person in the household who is responsible for chicken related activities

Can we start listing adult household members?

*Instructions:*

*Adults are household members 18 years and above.*

*Start with the most knowledgeable to the least knowledgeable*

Yes

No

## Household member

1

\* Name of the adult household member

---

\* 's age

*Enter age in completed YEARS*

---

\* FT: Observe 's gender

Male

Female

\* What is the highest level of education has completed?

PRE-SCHOOL

PRIMARY

SECONDARY

DIPLOMA

BACHELOR'S DEGREE OR HIGHER

NONE

OTHER (SPECIFY)

DON'T KNOW

\* 's phone number 1

---

\* 's phone number 2

*If they don't have write 999.*

---

The respondent for this section should be .

Is available?

- Yes, available now
- Yes, over the phone
- No, schedule for revisit

## REVISITED SSP HOUSEHOLD

Select household ID

---

---

The respondent for this section should be .

Is available?

- Yes, available now
- Yes, over the phone
- No, schedule for revisit

Please confirm you are speaking to;

Customer name:

Phone number 1:

Phone number 2:

Sex:

*If this information is not correct, please go back and select the right household.*

- Yes, all correct
- Yes, but information need update
- Not correct

## DETAILS UPDATE FOR EXISTING HOUSEHOLD

What information need some updates?

- Name
- Phone number

Enter SSP household member full name

---

Enter the new phone number for the household member

---

Does your household operate as a mother unit with this hatchery?

*Instructions:*

*Mother unit is a household that sell grower chicks (have attained 1 month old) mostly the dual-purpose chicks.*

Yes

No

## CHICKEN FLOCK TODAY

What type of chicken does your household currently keep?

None

Broilers

Layers

Dual

Local

How many broilers does your household keep today? (include both chickens and chicks)

---

How many layers does your household keep today? (include both chickens and chicks)

---

How many duals does your household keep today? (include both chickens and chicks)

---

How many local does your household keep today? (include both chickens and chicks)

---

Did your household buy any VDOCs in past 1 month?

Yes

No

**Did your household buy any VDOCs from Mkuza in past 1 month?**

*Instructions;*

*FT: Guide the SSP household to speak only about VDOCs purchased from this hatchery and not any other existing hatcheries in their areas.*

Yes

No

**How many batches of VDOCs did your household buy in the past 1 month?**

*Probe to ensure that all batches are mentioned.*

---

**Did your household buy all batches from Mkuza?**

Yes

No

**» ROSTER - VDOC\_batch**

**» CHICKEN FLOWS/FLOCK DYNAMIC DURING THE PAST 1 MONTH**

**In the past 1 month did your household sell any live chicken or chicks?**

None

Broilers

Layers

Dual

Local

**How many broilers have your household sold in the past 1 month?**

---

**How many layers have your household sold in the past 1 month?**

---

**How many duals have your household sold in the past 1 month?**

---

In the past 1 month, did any of your household's chicken or chick die for any reason such as disease or parasites, lack of food or water, killed by an animal, etc.?

- None
- Broilers
- Layers
- Dual
- Local

How many broilers died in the past in the past 1 month?

---

How many layers died in past 1 month?

---

How many duals died in the past 1 month?

---

## GENDER

The respondent for this section should be .

Click 'continue' to proceed?

- continue

The respondent for this section should be .

His/her phone numbers are , Is available?

- Yes, available now
- Yes, over the phone
- Not available

**FT: If is not available, ask to respond again in this section.**

Did agree to proceed?

- Yes
- No

In this section, please try to speak to the respondent individually and minimize influence from other household members so they can respond freely.

*Katika sehemu hii, tafadhali jaribu kuongea na msailiwa peke yake ili kutoruhusu kupata mchango wa majibu/ majadiliano kutoka kwa wanakaya wengine. Hii inalenga kupata maoni ya msailiwa pekee.*

**» DECISION MAKING**

To what degree are you involved in the household decision on whether or not to keep chickens?

- Not at all  
 Very little  
 Somewhat  
 A lot

To what degree are you involved in the household decision around how to use your chickens, for example whether to slaughter for household use, sell, buy, or give a chicken as a gift?

- Not at all  
 Very little  
 Somewhat  
 A lot

To what degree are you involved in the household decision around how to use the money earned from selling chicken or eggs?

- Not at all  
 Very little  
 Somewhat  
 A lot

To what degree are you involved in making veterinary decisions for chickens, such as whether to give medicines or vaccinations?

- Not at all  
 Very little  
 Somewhat  
 A lot

**» GENDER IMPACT**

In the last one month, how has the amount of time you personally spend on routine or daily activities for your chickens changed (like feeding, watering, cleaning)?

- Increased  
 Decreased  
 About the same

In the last one month, how have the benefits you personally receive from your chickens changed (like income, eggs, or meat for the household)?

- Increased  
 Decreased  
 About the same

In the last one month, how has your personal role in making management decisions about your chickens changed (like deciding to buy or sell chickens or deciding about veterinary care)?

- Increased
- Decreased
- About the same

We have now completed the interview. Thank you very much for taking the time to speak with me.

---

**FT: What information related to chicken management did you provided to this household in the past 1 month?**

- None
- Chicken feeding
- Vaccinations/medicines
- Chicken housing
- Chicken mortality
- Chicken market
- Other

**FT: What is the final outcome of the visit?**

- Completed (all sections)
- Partially completed (some information is missing)
- Refused
- Not available

**Enter any comments**

*Write OK if no comment(s)*

---

**FT: capture GPS**

---

latitude (x.y °)

---

longitude (x.y °)

---

altitude (m)

---

accuracy (m)

---

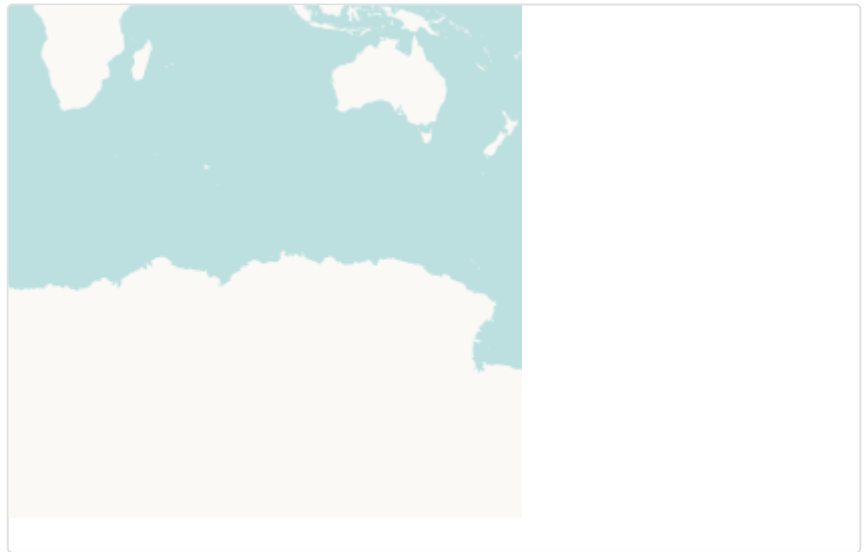

Supplement: Supplementary file 2 [file 0dd56e4ab7b5ca5cda1432c1.pdf]
