# Supplementary material
Source: Research Square preprint supplement (doi:10.21203/rs.3.rs-8918389/v1)
Supplement: Supplementary file 3 [file 1f9893a22944bacdc849216e.pdf]

# PREVENT\_Tanzania\_ENDLINE

---

## SURVEY IDENTIFICATION INFORMATION QUESTIONNAIRE DESCRIPTION

### A. COVER

No sub-sections, No rosters, Questions: 10.

### B. TRACKING

No sub-sections, Rosters: 1, Questions: 12, Static texts: 8.

### C. HOUSEHOLD ROSTER

No sub-sections, Rosters: 2, Questions: 31, Static texts: 3, Variables: 15.

### R0. IMPACT EVALUATION

Sub-sections: 18, Rosters: 3, Questions: 247, Static texts: 16, Variables: 88.

### R1. PRIMARY RESPONDENT

Sub-sections: 79, Rosters: 7, Questions: 272, Static texts: 19, Variables: 125.

### R2: SECONDARY RESPONDENT

Sub-sections: 79, Rosters: 7, Questions: 270, Static texts: 18, Variables: 125.

### Q. RESULT

Sub-sections: 1, No rosters, Questions: 23, Static texts: 1.

## APPENDIX A — ENABLING CONDITIONS

## APPENDIX B — VALIDATION CONDITIONS AND MESSAGES

## APPENDIX C — INSTRUCTIONS

## APPENDIX D — CATEGORIES

## APPENDIX E — VARIABLES

## LEGEND

# *SURVEY IDENTIFICATION INFORMATION*

## *QUESTIONNAIRE DESCRIPTION*

---

### **Basic information**

*Title* PREVENT\_Tanzania\_ENDLINE

## A. COVER

|          |                                                                                                                                                                                                                                                                                                                                                                                                                     |
|----------|---------------------------------------------------------------------------------------------------------------------------------------------------------------------------------------------------------------------------------------------------------------------------------------------------------------------------------------------------------------------------------------------------------------------|
| COUNTRY  | SINGLE-SELECT <span style="float: right;">country_id</span><br>01 <input type="radio"/> Tanzania<br>02 <input type="radio"/> Nigeria                                                                                                                                                                                                                                                                                |
| REGION   | SINGLE-SELECT: CASCADING <span style="float: right;">reg_id</span><br>01 <input type="radio"/> Arusha<br>02 <input type="radio"/> Pwani<br>03 <input type="radio"/> Dar es Salaam<br>04 <input type="radio"/> Iringa<br>05 <input type="radio"/> Mbeya<br>06 <input type="radio"/> Njombe<br>07 <input type="radio"/> Songwe                                                                                        |
| DISTRICT | SINGLE-SELECT: CASCADING <span style="float: right;">dist_id</span><br>12 <input type="radio"/><br>11 <input type="radio"/><br><br>28 <input type="radio"/><br><br>29 <input type="radio"/><br><br>32 <input type="radio"/><br>33 <input type="radio"/><br><br>44 <input type="radio"/><br><br>55 <input type="radio"/><br>56 <input type="radio"/><br><br>67 <input type="radio"/><br><br>79 <input type="radio"/> |

WARD

SINGLE-SELECT: CASCADING

ward\_id

- 1101
- 1102
- 1103
- 1104
- 1105
- 1106
- 1107
- 1108
- 1109
- 1110
- 1111
- 1112
- 1123
- 1213
- 1216
- 1217

[And 103 other symbols \[4\]](#)

VILLAGE/ MTAA

SINGLE-SELECT: CASCADING

vlg\_id

- 113
- 114
- 111
- 104
- 105
- 115
- 108
- 109
- 101
- 102
- 107
- 103
- 112
- 106
- 110
- 126

[And 194 other symbols \[5\]](#)

SUB-VILLAGE/ AREA

TEXT

kitongoji

.....

|                                     |                                                                                                                                                                                                                                                                                          |
|-------------------------------------|------------------------------------------------------------------------------------------------------------------------------------------------------------------------------------------------------------------------------------------------------------------------------------------|
| <p>CHOOSE THE TYPE OF INTERVIEW</p> | <p>SINGLE-SELECT <span style="float: right;">long_short</span></p> <p>01      <input type="radio"/> SECTOR 3 - LONG</p> <p>02      <input type="radio"/> SECTOR 3 - SHORT</p> <p>04      <input type="radio"/> SECTOR 4 - LONG</p> <p>03      <input type="radio"/> SECTOR 4 - SHORT</p> |
| <p>HOUSEHOLD ID</p>                 | <p>TEXT <span style="float: right;">hhid</span></p> <p>.....</p>                                                                                                                                                                                                                         |
| <p>HOUSEHOLD HEAD NAME</p>          | <p>TEXT <span style="float: right;">head_name</span></p> <p>.....</p>                                                                                                                                                                                                                    |
| <p>CHICKEN CARETAKER NAME</p>       | <p>TEXT <span style="float: right;">chk_ct_name</span></p> <p>.....</p>                                                                                                                                                                                                                  |

## B. TRACKING

|                                                                                   |                                                                                                                      |                |
|-----------------------------------------------------------------------------------|----------------------------------------------------------------------------------------------------------------------|----------------|
| Did you manage to locate this household?                                          | SINGLE-SELECT<br>01 <input type="radio"/> Yes<br>02 <input type="radio"/> No                                         | locate_hh      |
| ENUMERATOR: SELECT YOUR SEX                                                       | SINGLE-SELECT<br>01 <input type="radio"/> MALE<br>02 <input type="radio"/> FEMALE                                    | enum_sex       |
| E long_short==1    long_short==4 && locate_hh==1                                  |                                                                                                                      |                |
| IS THIS A PARENT QUESTIONNAIRE?                                                   | SINGLE-SELECT<br>01 <input type="radio"/> YES<br>02 <input type="radio"/> NO                                         | qnr_parent     |
| E long_short==1    long_short==4                                                  |                                                                                                                      |                |
| STATIC TEXT                                                                       |                                                                                                                      |                |
| Does your household keep any chickens, including chicks?                          | SINGLE-SELECT<br>01 <input type="radio"/> YES<br>02 <input type="radio"/> NO                                         | anychicken     |
| E qnr_parent==1    long_short==2    long_short==3 && locate_hh==1                 |                                                                                                                      |                |
| Did your household keep any chickens, including chicks during the last 12 months? | SINGLE-SELECT<br>01 <input type="radio"/> Yes<br>02 <input type="radio"/> No                                         | anychicken_12m |
| E anychicken==2                                                                   |                                                                                                                      |                |
| STATIC TEXT                                                                       |                                                                                                                      |                |
| SELECT VISIT NUMBER                                                               | SINGLE-SELECT<br>01 <input type="radio"/> FIRST<br>02 <input type="radio"/> SECOND<br>03 <input type="radio"/> THIRD | visit_num      |
| E anychicken==1    anychicken_12m==1                                              |                                                                                                                      |                |

B. TRACKING

Roster: VISITS

generated by fixed list

visits

01 FIRST

02 SECOND

03 THIRD

E @rowcode <= visit\_num

|                                                                                                                                                                                                                                                                                                                                  |                                                                                                                                                                                                                                                                                             |
|----------------------------------------------------------------------------------------------------------------------------------------------------------------------------------------------------------------------------------------------------------------------------------------------------------------------------------|---------------------------------------------------------------------------------------------------------------------------------------------------------------------------------------------------------------------------------------------------------------------------------------------|
| <p>TAKE GPS</p>                                                                                                                                                                                                                                                                                                                  | <p>GPS <span style="float: right;">gps</span></p> <p>-----</p> <p>N</p> <p>-----</p> <p>W</p> <p>-----</p> <p>A</p>                                                                                                                                                                         |
| <p>WHERE ARE YOU?</p>                                                                                                                                                                                                                                                                                                            | <p>SINGLE-SELECT <span style="float: right;">location</span></p> <p>01      <input type="radio"/> AT HOUSEHOLD</p> <p>02      <input type="radio"/> THE FIELDS</p> <p>03      <input type="radio"/> ELSEWHERE</p>                                                                           |
| <p>TAKE TIME</p>                                                                                                                                                                                                                                                                                                                 | <p>DATE: CURRENT TIME <span style="float: right;">time</span></p> <p>MM/DD/YYYY</p> <p>.....</p>                                                                                                                                                                                            |
| <p>I would like to speak to the main person who mainly looks after the chicken in this household and knows best about them. Is this person available?</p> <p>F ((@optioncode==1    @optioncode==3) &amp;&amp; @rowcode==3)    ((@optioncode==1    @optioncode==2    @optioncode==3) &amp;&amp; (@rowcode==1    @rowcode==2))</p> | <p>SINGLE-SELECT <span style="float: right;">mrsp</span></p> <p>01      <input type="radio"/> YES</p> <p>02      <input type="radio"/> NOT AVAILABLE NO<br/>W -&gt; REVISIT</p> <p>03      <input type="radio"/> LONG TERM UNAVAILABLE --&gt; NO, CANNOT REVISIT ANY MORE</p>               |
| <p>Is there someone else in this household who knows about the chickens and how they are looked after, and is available?</p> <p>F ((@optioncode==1    @optioncode==3) &amp;&amp; @rowcode==3)    ((@optioncode==1    @optioncode==2    @optioncode==3) &amp;&amp; (@rowcode==1    @rowcode==2))</p> <p>E mrsp.InList(3)</p>      | <p>SINGLE-SELECT <span style="float: right;">orosp</span></p> <p>01      <input type="radio"/> YES</p> <p>02      <input type="radio"/> NOT AVAILABLE NO<br/>W -&gt; REVISIT</p> <p>03      <input type="radio"/> LONG TERM UNAVAILABLE, CANNOT REVISIT ANY MORE -&gt; REPLACE</p> <p>E</p> |

---

STATIC TEXT

E visits.Any(x=>x.mrsp == 1 || x.orsp == 1) || qnr\_parent==2

*Hello, my name is \_\_\_\_\_ and I work for Oxford Policy Management. Thank you for the opportunity to speak with you. Your household took part in a study on chicken-keeping and other livelihoods to understand how purchasing vaccinated day old chicks improves the life of chicken-keeping farmers, including their nutrition, health, and well-being in 2023.*

---

STATIC TEXT

E visits.Any(x=>x.mrsp == 1 || x.orsp == 1) || qnr\_parent==2

*We will use approximately 2 hours to collect all the information. The survey will again collect information about your income-generating activities, food consumption, and living conditions. As in baseline would like to know how your household responded to difficult situations in the year. Finally, we want to know about your attitudes and mobility within and outside the community. The research team may attempt to recontact you to ask more detailed questions about the topics covered in this survey. If we attempt to recontact you, your participation is voluntary.*

---

STATIC TEXT

E visits.Any(x=>x.mrsp == 1 || x.orsp == 1) || qnr\_parent==2

*There will be no cost to you other than your time and there is very little risk to you in taking part in this survey. Your participation in this research is completely voluntary. You can stop answering questions at any time and you will not be adversely affected. You can also ask me any questions. You are also free to refuse to answer any question we may ask.*

---

STATIC TEXT

E visits.Any(x=>x.mrsp == 1 || x.orsp == 1) || qnr\_parent==2

*This study is conducted anonymously. You will only be identified through code numbers and not by name. Any information we obtain from you during the research will be kept strictly confidential. We will not share the information you give us with anyone else outside the study team.*

---

STATIC TEXT

E visits.Any(x=>x.mrsp == 1 || x.orsp == 1) || qnr\_parent==2

*Your participation will be highly appreciated. The answers you give will help provide better information to policy-makers, practitioners, and program managers so that they can plan for better services to support your chicken-keeping activities.*

*If you experience any problems with any member of our survey team, you may contact \_\_\_\_\_ who represents Oxford Policy Management as the person responsible for operations and administration of the survey.*

---

Do you agree to participate in our research?

SINGLE-SELECT

consent

01  YES

02  NO

E visits.Any(x=>x.mrsp == 1 || x.orsp == 1) || qnr\_parent==2

---

---

STATIC TEXT

E locate\_hh==1

*THROUGHOUT THE QUESTIONNAIRE, USE THE FOLLOWING SPECIAL CODES:*

*-97 REFUSED*

*-98 NOT APPLICABLE*

*-99 DON'T KNOW*

---

## C. HOUSEHOLD ROSTER

E consent==1

C1. How many members are a part of your household? By household member I mean all people who normally live and eat together, and who share resources among each other. Please include individuals who were recently born or joined the household in any other reason, and individuals who are currently not present but spent more than half of their time in the past 3 months living with members of this household.

I HOUSEHOLD DEFINITION: A household is a group of people, or person, who share food and other resources under a common budget and live in the same compound/homestead. <br> POLYGAMOUS HOUSEHOLDS: If thi  
[And 771 other symbols \[1\]](#)

NUMERIC: INTEGER

hh\_num

-----

VARIABLE

STRING

memstr

String.Join(", ", h roster .where(z=>z.e1\_crtmem==1) .select(x=>\${x.rowname}"))

VARIABLE

LONG

memnum

h roster .Count(x=>x.e1\_crtmem==1)

STATIC TEXT

*Now I am going to ask you for everyone who we recorded during our last visit if they still are a member of this household.*

C. HOUSEHOLD ROSTER

Roster: FROM BL - %ROSTERTITLE%

generated by list question [list](#)

h roster

PRELOADED h roster \_id

NUMERIC: INTEGER  
SCOPE: HIDDEN

p1\_h roster \_id

-----

PRELOADED SEX

SINGLE-SELECT  
SCOPE: HIDDEN

p1\_sex

01  MALE

02  FEMALE

|                                                                           |                                                                                                                                                                                                                                                                                                                                                                                                                                                                                                                                                                                                                                                                                                                                                                                                                                                     |
|---------------------------------------------------------------------------|-----------------------------------------------------------------------------------------------------------------------------------------------------------------------------------------------------------------------------------------------------------------------------------------------------------------------------------------------------------------------------------------------------------------------------------------------------------------------------------------------------------------------------------------------------------------------------------------------------------------------------------------------------------------------------------------------------------------------------------------------------------------------------------------------------------------------------------------------------|
| PRELOADED RELATIONSHIP TO HEAD                                            | <p>SINGLE-SELECT <span style="float: right;">p1_re1</span><br/>SCOPE: HIDDEN</p> <p>01 <input type="radio"/> Household head</p> <p>02 <input type="radio"/> Spouse</p> <p>03 <input type="radio"/> Son/Daughter</p> <p>04 <input type="radio"/> Step son/Step daughter</p> <p>05 <input type="radio"/> Son-in-law/Daughter-in-law</p> <p>06 <input type="radio"/> Grandson/Granddaughter</p> <p>07 <input type="radio"/> Father/Mother</p> <p>08 <input type="radio"/> Brother/Sister</p> <p>09 <input type="radio"/> Aunt/Uncle</p> <p>10 <input type="radio"/> Niece/Nephew</p> <p>11 <input type="radio"/> Cousin</p> <p>12 <input type="radio"/> Father-in-law/Mother-in-law</p> <p>13 <input type="radio"/> Brother-in-law/Sister-in-law</p> <p>14 <input type="radio"/> Other relative</p> <p>15 <input type="radio"/> Other non-relative</p> |
| PRELOADED AGE, AGE AT BL+2                                                | <p>NUMERIC: INTEGER <span style="float: right;">p1_age</span><br/>SCOPE: HIDDEN</p> <p>-----</p>                                                                                                                                                                                                                                                                                                                                                                                                                                                                                                                                                                                                                                                                                                                                                    |
| <p>VARIABLE</p> <p>!IsAnswered(p1_hhroster_id) ? 1 : 0</p>                | <p>LONG <span style="float: right;">e1_newmem</span></p>                                                                                                                                                                                                                                                                                                                                                                                                                                                                                                                                                                                                                                                                                                                                                                                            |
| <p>VARIABLE</p> <p>e1_newmem==1    e1_st1mem.InList(1,2) ? 1 : 0</p>      | <p>LONG <span style="float: right;">e1_crtmem</span></p>                                                                                                                                                                                                                                                                                                                                                                                                                                                                                                                                                                                                                                                                                                                                                                                            |
| <p>Is %hhroster% (%sex_str%, %age%) still a member of this household?</p> | <p>SINGLE-SELECT <span style="float: right;">e1_st1mem</span></p> <p>01 <input type="radio"/> YES, DETAILS CORRECT</p> <p>02 <input type="radio"/> YES, UPDATE DETAILS</p> <p>03 <input type="radio"/> NO</p>                                                                                                                                                                                                                                                                                                                                                                                                                                                                                                                                                                                                                                       |
| <p>E e1_newmem == 0 // for pre-loaded members only</p>                    |                                                                                                                                                                                                                                                                                                                                                                                                                                                                                                                                                                                                                                                                                                                                                                                                                                                     |

Why did %rostertitle% leave this house hold?

SINGLE-SELECT

e1\_rsn1ft

E e1\_st1mem == 3 // no longer a household member  
V1 !(age<12 && self.InList(1,3,7))  
M1 Person is too young to have left the household for this reason!

- 01  DIVORCE/SEPARATION
- 02  LEFT FOR STUDIES/ EDUCATIONAL OPPORTUNITY
- 03  LEFT FOR WORK
- 04  LEFT TO FIND BETTER LAND
- 05  HEALTH REASONS
- 06  SECURITY REASONS
- 07  FOR MARRIAGE/ COHABITATION
- 08  TO JOIN THEIR FAMILY ALREADY LIVING IN ANOTHER LOCATION
- 09  MOVED WITH FAMILY
- 10  LEFT TO SET UP OWN HOME
- 11  DEAD
- 12  STAYED WITH ORIGINAL HOUSEHOLD
- 13  NEVER BEEN A MEMBER / RECORDED WRONGLY IN BL
- 96  OTHER, (SPECIFY)

SPECIFY OTHER

TEXT

e1\_rsn1ft\_oth

E e1\_rsn1ft== -96

.....

When did this happen?

F /\* keep only answer options between Oct 2016 and month code of interview date \*/ @optioncode >= 10 && @optioncode <= 55  
 E e1\_rsnlft < 13 // anything other than never been a member

SINGLE-SELECT

e1\_mthlft

- 25  JAN 23
- 26  FEB 23
- 27  MAR 23
- 28  APR 23
- 29  MAY 23
- 30  JUN 23
- 31  JUL 23
- 32  AUG 23
- 33  SEP 23
- 34  OCT 23
- 35  NOV 23
- 36  DEC 23
- 37  JAN 24
- 38  FEB 24
- 39  MAR 24
- 40  APR 24

[And 15 other symbols \[3\]](#)

VARIABLE

@rowcode == e1\_headcd ? 1 : 0

LONG

ishead

VARIABLE

e1\_sex ?? p1\_sex

LONG

sex

VARIABLE

sex == 1 ? "Male" : sex == 2 ? "Female" : ""

STRING

sex\_str

VARIABLE

e1\_age ?? p1\_age

LONG

age

C3. Is there anyone else who I have not read who is a member of this household?

SINGLE-SELECT

anymiss

- 01  YES - PROBE AND ADD ALL BELOW
- 02  NO

|                                                                                                                                                                                                                                                                                                                                                                                                                                                                                                                                                                                                                                                                                                                                                                                                                                                                                                                                                              |                                                                                                                                          |
|--------------------------------------------------------------------------------------------------------------------------------------------------------------------------------------------------------------------------------------------------------------------------------------------------------------------------------------------------------------------------------------------------------------------------------------------------------------------------------------------------------------------------------------------------------------------------------------------------------------------------------------------------------------------------------------------------------------------------------------------------------------------------------------------------------------------------------------------------------------------------------------------------------------------------------------------------------------|------------------------------------------------------------------------------------------------------------------------------------------|
| <p><b>C2. NAME AND SURNAME</b></p> <p>I ADD NEW MEMBERS HERE. IGNORE IF THERE ARE NO NEW MEMBERS</p> <p>V1 <code>self.Select(x=&gt;x.Item2.ToUpper()).Distinct().Count()==self.Count()</code></p> <p>M1 Use unique names. Use common name or Sr./Jr. to distinguish if 2 members have the same name.</p> <p>V2 <code>self.All(x=&gt;x.Item2.Split(' ').Length&gt;1)</code></p> <p>M2 Write name and surname.</p> <p>V3 <code>hroster.All(x=&gt;IsAnswered(x.e1_crtmem) &amp;&amp; IsAnswered(hh_num) ? memnum==hh_num : true)</code></p> <p>M3 The number of current members does not match the number of members (%hh_num%) specified in the first question.</p> <p>V4 <code>anymiss == 1 ? hroster.Any(x=&gt;x.e1_newmem==1) : true</code></p> <p>M4 Add new members here and fill in details below.</p> <p>V5 <code>anymiss == 2 ? !hroster.Any(x=&gt;x.e1_newmem==1) : true</code></p> <p>M5 You said there are no new members but listed some here.</p> | <p>LIST <span style="float: right;">list</span></p> <p>-----</p>                                                                         |
| <p><b>PRE-LOADED HEAD OF HOUSEHOLD</b></p>                                                                                                                                                                                                                                                                                                                                                                                                                                                                                                                                                                                                                                                                                                                                                                                                                                                                                                                   | <p>NUMERIC: INTEGER <span style="float: right;">p1_head</span><br/>SCOPE: HIDDEN</p> <p>-----</p>                                        |
| <p>VARIABLE</p> <p><code>hroster.Where(z=&gt;z.@rowcode==p1_head).Select(x=&gt;\${x.rowname}).First()</code></p>                                                                                                                                                                                                                                                                                                                                                                                                                                                                                                                                                                                                                                                                                                                                                                                                                                             | <p>STRING <span style="float: right;">p1_headname</span></p>                                                                             |
| <p><b>Is %p1_headname% still the head of this household?</b></p> <p>I HOUSEHOLD HEAD: the individual who plays a leading role in household decision-making, particularly concerning household economic activity and expenditures. Generally, the person identified by the household head.</p> <p><a href="#">And 68 other symbols [2]</a></p> <p>E <code>hroster.Any(z=&gt;z.@rowcode==p1_head &amp;&amp; z.e1_crtmem==1) // if BL head is still present</code></p>                                                                                                                                                                                                                                                                                                                                                                                                                                                                                          | <p>SINGLE-SELECT <span style="float: right;">e1_st1hed</span></p> <p>01 <input type="radio"/> YES</p> <p>02 <input type="radio"/> NO</p> |
| <p><b>C4. Who is the head of the household?</b></p> <p>F <code>e1_crtmem == 1</code></p> <p>E <code>!hroster.Any(z=&gt;z.@rowcode==p1_head &amp;&amp; z.e1_crtmem==1)    e1_st1hed == 2 // old head no longer present or no longer head</code></p> <p>V1 <code>self[0] != p1_head</code></p> <p>M1 Cannot be the same as the previous household head.</p>                                                                                                                                                                                                                                                                                                                                                                                                                                                                                                                                                                                                    | <p>SINGLE-SELECT: LINKED <span style="float: right;">e1_head</span><br/>SOURCE OF CATEGORIES: ROSTER <a href="#">HHROSTER</a></p>        |
| <p>VARIABLE</p> <p><code>e1_st1hed == 1 ? p1_head : e1_head[0]</code></p>                                                                                                                                                                                                                                                                                                                                                                                                                                                                                                                                                                                                                                                                                                                                                                                                                                                                                    | <p>LONG <span style="float: right;">e1_headcd</span></p>                                                                                 |
| <p>VARIABLE</p> <p><code>hroster.Where(z=&gt;z.@rowcode==e1_headcd).Select(x=&gt;\${x.rowname}).First()</code></p>                                                                                                                                                                                                                                                                                                                                                                                                                                                                                                                                                                                                                                                                                                                                                                                                                                           | <p>STRING <span style="float: right;">head</span></p>                                                                                    |

C. HOUSEHOLD ROSTER

Roster: DETAILS - %ROSTERTITLE% (%SEX\_STR%, %AGE%)

generated by list question [list](#)

members

E e1\_crtmem == 1 // for current members only

|                                                 |                                                                                                                                                                                                                                                                                                                                                                                                                                                                                                                                                                                     |               |
|-------------------------------------------------|-------------------------------------------------------------------------------------------------------------------------------------------------------------------------------------------------------------------------------------------------------------------------------------------------------------------------------------------------------------------------------------------------------------------------------------------------------------------------------------------------------------------------------------------------------------------------------------|---------------|
| WHAT NEEDS UPDATING?                            | MULTI-SELECT                                                                                                                                                                                                                                                                                                                                                                                                                                                                                                                                                                        | e1_detcor     |
| E e1_stlmem == 2                                | 01 <input type="checkbox"/> SEX<br>02 <input type="checkbox"/> AGE                                                                                                                                                                                                                                                                                                                                                                                                                                                                                                                  |               |
| Why did %rostartitle% join this household?      | SINGLE-SELECT                                                                                                                                                                                                                                                                                                                                                                                                                                                                                                                                                                       | e1_rsnjon     |
| E // only enable for new members e1_newmem == 1 | 01 <input type="radio"/> NEW BORN<br>02 <input type="radio"/> ADOPTED CHILD<br>03 <input type="radio"/> MARRIAGE /COHABITATION<br>04 <input type="radio"/> DIVORCE /SEPARATION<br>05 <input type="radio"/> RETURNED FROM COLLEGE/UNIV<br>06 <input type="radio"/> RETURNED FROM INSTITUTION<br>07 <input type="radio"/> MOVED IN WITH PARENT OR RELATIVE<br>08 <input type="radio"/> SHARED ACCOMODATION<br>09 <input type="radio"/> RETURN FROM WORK MIGRATION<br>10 <input type="radio"/> WAS MEMBER AT BL / MISTAKENLY NOT RECORDED<br>-96 <input type="radio"/> OTHER (SPECIFY) |               |
| SPECIFY OTHER                                   | TEXT                                                                                                                                                                                                                                                                                                                                                                                                                                                                                                                                                                                | e1_rsnjon_oth |
| E e1_rsnjon== -96                               | .....                                                                                                                                                                                                                                                                                                                                                                                                                                                                                                                                                                               |               |

C5. What is %hhroster%'s relationship to %head%?

E (e1\_newmem == 1 // for new members || e1\_st1  
hed == 2) // or for everyone if new head &&  
@rowcode != e1\_headcd // and not for the head  
itself

SINGLE-SELECT

re1

- 02  Spouse
- 03  Son/Daughter
- 04  Step son/Step daughter
- 05  Son-in-law/Daughter-in-law
- 06  Grandson/Granddaughter
- 07  Father/Mother
- 08  Brother/Sister
- 09  Aunt/Uncle
- 10  Niece/Nephew
- 11  Cousin
- 12  Father-in-law/Mother-in-law
- 13  Brother-in-law/Sister-in-law
- 14  Other relative
- 15  Other non-relative

C6. WHAT IS %hhroster%'s SEX?

I Ask respondent if %hhroster% is not around.  
E e1\_newmem == 1 // for new members || e1\_detc  
or.ContainsAny(1) // or if needs updating  
V1 re1 == 2 ? ! hhroster.Any(x=>x.ishead==1 &&  
x.sex==sex) : true  
M1 The head and his/her spouse typically have different gender.

SINGLE-SELECT

e1\_sex

- 01  MALE
- 02  FEMALE

## C7. What is %hhroster%'s age?

NUMERIC: INTEGER

e1\_age

I In completed years. Estimate if DK.

E e1\_newmem == 1 // for new members || e1\_detc  
or.ContainsAny(2) // or if needs updating

V1 self>=0 && self<100 || self==--99

M1 Age not in range

V2 @rowcode==e1\_headcd && age!--99 ? age>15 : t  
rue

M2 Age too young to be head.

V3 re1==12 && age!--99 ? age > 30 : true

M3 Age too young to be parent in law

V4 re1.InList(6) && age!--99 ? age < 50 : true

M4 Age too old to be a grandson or daughter

V5 re1 == 3 && age!--99 ? ! hhroster.Any(x=>x.i  
shead==1 && x.age<=age+12) : true

M5 Age too old to be child of the head.

V6 re1 == 6 && age!--99 ? ! hhroster.Any(x=>x.i  
shead==1 && x.age<=age+24) : true

M6 Age too old to be grand child of the head.

V7 re1 == 7 && age!--99 ? ! hhroster.Any(x=>x.i  
shead==1 && x.age>=age-12) : true

M7 Age too young to be parent of the head.

V8 re1.InList(2) && age!--99 ? age > 15 : true

M8 Age too young to be spouse.

V9 re1 == 4 && age!--99 ? ! hhroster.Any(x=>x.i  
shead==1 && x.age<=age+5) : true

M9 Age too old to be step child.

V10 e1\_rsnjon == 1 ? age <= 2 // if newborn, age  
should be <=2 : e1\_rsnjon.InList(3,4,6,8,9)  
? age >= 15 // unlikely if younger : e1\_rsnj  
on == 5 ? age >=8 // only possible if at sch  
ool at BL : e1\_rsnjon. [And 60 other symbols \[1\]](#)

M10 Age and reason for joining household are unlikely to mat  
ch.

-----  
SPECIAL VALUES

00 LESS THAN 1 YEAR OLD

C8. What is the highest level of education that %hroster% has completed?

E (e1\_newmem == 1 // for new members || e1\_detector.ContainsAny(2)) // or if needs updating && age >= 5

V1 self.InRange(1,16) ? age >= self + 5 : self.InRange(17,22) ? age >= self : self == 23 ? age >= 12 : self == 0 ? age >= 5 : true

M1 Education level is high given the age.

SINGLE-SELECT

educmp

- 00  PRE-SCHOOL (NOT COMPLETED)
- 01  PRE-SCHOOL (COMPLETED)
- 02  PRIMARY (NOT COMPLETED)
- 03  PRIMARY (COMPLETED)
- 04  O-LEVEL (NOT COMPLETED)
- 05  O-LEVEL (COMPLETED)
- 06  O-LEVEL + CERTIFICATE
- 07  A-LEVEL (NOT COMPLETED)
- 08  A-LEVEL (COMPLETED)
- 09  A-LEVEL + CERTIFICATE
- 10  DIPLOMA
- 11  BACHELOR'S DEGREE
- 12  POST-GRADUATE DEGREE (MASTER'S, PHD, ETC.)
- 95  NONE
- 96  OTHER (SPECIFY)
- 99  DON'T KNOW

C9. Is %hroster% currently enrolled in school?

I Consider formal school or university only. Select 'YES' if enrolled, independently if they are attending or not.

E age.InRange(5,18)

SINGLE-SELECT

school

- 01  YES
- 02  NO

|                                                                                                                                                                                                                            |                                                                                                                                                                                                                                                                                                                          |
|----------------------------------------------------------------------------------------------------------------------------------------------------------------------------------------------------------------------------|--------------------------------------------------------------------------------------------------------------------------------------------------------------------------------------------------------------------------------------------------------------------------------------------------------------------------|
| <p>C10. Since the start of the school year, and when schools have been open, how often has %hhroster% attended school? Is it always, more than half the time, about half the time, less than half the time, or rarely?</p> | <p>SINGLE-SELECT <span style="float: right;">school_atnd</span></p> <p>01 <input type="radio"/> ALWAYS</p> <p>02 <input type="radio"/> MORE THAN HALF THE TIME</p> <p>03 <input type="radio"/> HALF THE TIME</p> <p>04 <input type="radio"/> LESS THAN HALF THE TIME</p> <p>05 <input type="radio"/> RARELY OR NEVER</p> |
| <p>E school==1</p>                                                                                                                                                                                                         |                                                                                                                                                                                                                                                                                                                          |

|                                                                                                       |                                                          |
|-------------------------------------------------------------------------------------------------------|----------------------------------------------------------|
| <p>VARIABLE</p> <p>hhroster.Count(x=&gt;((x.age&gt;=0) &amp;&amp; (x.age&lt;5))    (x.age==--99))</p> | <p>LONG <span style="float: right;">num_child</span></p> |
|-------------------------------------------------------------------------------------------------------|----------------------------------------------------------|

|                                                                                                                              |                                                         |
|------------------------------------------------------------------------------------------------------------------------------|---------------------------------------------------------|
| <p>VARIABLE</p> <p>hhroster.Count(x=&gt;(x.sex==2) &amp;&amp; ((x.age&gt;14) &amp;&amp; (x.age&lt;50)    (x.age==--99)))</p> | <p>LONG <span style="float: right;">num_wrep</span></p> |
|------------------------------------------------------------------------------------------------------------------------------|---------------------------------------------------------|

|                                                                              |                                                                                                                                        |
|------------------------------------------------------------------------------|----------------------------------------------------------------------------------------------------------------------------------------|
| <p>C11. Are any women in your household currently pregnant or lactating?</p> | <p>SINGLE-SELECT <span style="float: right;">wom_rep</span></p> <p>01 <input type="radio"/> YES</p> <p>02 <input type="radio"/> NO</p> |
| <p>E num_wrep&gt;0</p>                                                       |                                                                                                                                        |

|                                                                                                     |                                                                                                                                                                                                                     |
|-----------------------------------------------------------------------------------------------------|---------------------------------------------------------------------------------------------------------------------------------------------------------------------------------------------------------------------|
| <p>C12. Does this household have a man and a woman who are participating in chicken production?</p> | <p>SINGLE-SELECT <span style="float: right;">hh_type</span></p> <p>01 <input type="radio"/> YES, BOTH MAN AND WOMAN</p> <p>02 <input type="radio"/> NO, WOMAN ONLY</p> <p>03 <input type="radio"/> NO, MAN ONLY</p> |
| <p>E long_short==1    long_short==4 // &amp;&amp; qnr_parent==1</p>                                 |                                                                                                                                                                                                                     |

STATIC TEXT

E hh\_type == 2 || hh\_type==3

**ATTENTION: THIS HOUSEHOLD DOES NOT NEED A SECOND INTERVIEW FOR WELI SINCE IT HAS CHICKEN CARETAKER OF THE SAME SEX.**

STATIC TEXT

E \$men\_onlys3long==true

**ATTENTION: THIS HOUSEHOLD DOES NOT QUALIFY TO BE LONG BECAUSE YOU HAVE SELECTED A LONG AND IT HAS ONLY MEN AS CHICKEN CATERETAKER.**

|                                                                                                            |                                                                                                                                  |
|------------------------------------------------------------------------------------------------------------|----------------------------------------------------------------------------------------------------------------------------------|
| <p>C13. Who is the person who mainly looks after the chicken in this household, knows best about them?</p> | <p>SINGLE-SELECT: LINKED <span style="float: right;">chk_ct</span><br/>SOURCE OF CATEGORIES: ROSTER <a href="#">HHROSTER</a></p> |
| <p>F age&gt;=18</p>                                                                                        |                                                                                                                                  |

|                                         |                                                                                                                                                   |
|-----------------------------------------|---------------------------------------------------------------------------------------------------------------------------------------------------|
| <p>C13b. SELECT %chk_ct%'S GENDER</p>   | <p>SINGLE-SELECT <span style="float: right;">chk_ct_gender</span></p> <p>01 <input type="radio"/> MALE</p> <p>02 <input type="radio"/> FEMALE</p> |
| <p>E long_short==1    long_short==4</p> |                                                                                                                                                   |

IS %chk\_ct% AVAILABLE FOR AN INTERVIEW TODAY?

SINGLE-SELECT

chk\_ct\_avai1

- 01  YES
- 02  NO

C14. Who is the person of opposite sex to %chk\_ct% who also looks after the chicken in this household and knows best about them?

SINGLE-SELECT: LINKED  
SOURCE OF CATEGORIES: ROSTER [HHROSTER](#)

chk\_ct\_2

- E hh\_type==1
- V1 self!=chk\_ct
- M1 Primary and secondary respondent can not be the same

C13b. SELECT %chk\_ct\_2%'S GENDER

SINGLE-SELECT

chk\_ct\_2gender

- 01  MALE
- 02  FEMALE

- E hh\_type==1
- V1 self!=chk\_ct\_gender
- M1 Primary and secondary respondent gender are the same.

IS %chk\_ct\_2% AVAILABLE FOR AN INTERVIEW TODAY?

SINGLE-SELECT

chk\_ct\_avai12

- 01  YES
- 02  NO

- E hh\_type==1

VARIABLE  
chk\_ct\_gender==1 ? 1: 0

LONG

chk\_ct\_male

VARIABLE  
chk\_ct\_2gender==1 ? 1: 0

LONG

chk\_ct2\_male

# R0. IMPACT EVALUATION

E consent==1 // consented && (qnr\_parent==1 || long\_short==2 // s3 short || long\_short==3) // s4 short

## R0. IMPACT EVALUATION D. CHICKEN

|                                                                                                                                                            |                                                                                |            |
|------------------------------------------------------------------------------------------------------------------------------------------------------------|--------------------------------------------------------------------------------|------------|
| TAKE TIME                                                                                                                                                  | DATE: CURRENT TIME<br>MM/DD/YYYY                                               | chk_start  |
| VARIABLE<br>chk_start.Value.Date.AddDays(-7).ToString("ddd dd/MM/yyyy")                                                                                    | STRING                                                                         | rc17dy     |
| VARIABLE<br>chk_start.Value.Date.AddMonths(-3).ToString("dd/MM/yyyy")                                                                                      | STRING                                                                         | rc13mt     |
| VARIABLE<br>chk_start.Value.Date.AddDays(-30).ToString("dd/MM/yyyy")                                                                                       | STRING                                                                         | rc130d     |
| VARIABLE<br>chk_start.Value.Date.ToString("MMMM")                                                                                                          | STRING                                                                         | rc112mt    |
| D1. THE RESPONDENT FOR THIS SECTION SHOULD BE %chk_ct% (THE CHICKEN CARETAKER). IS HE/SHE AVAILABLE?<br>E visits.Any(x=>x.mrsp == 1)                       | SINGLE-SELECT<br>01 <input type="radio"/> YES<br>02 <input type="radio"/> NO   | chkrsp_yn  |
| D2. SELECT RESPONDENT FOR THIS SECTION.SOMEONE ELSE IN THE HOUSEHOLD WHO KNOWS ABOUT CHICKENS<br>F age>=15<br>E chkrsp_yn==2    visits.Any(x=>x.orsp == 1) | SINGLE-SELECT: LINKED<br>SOURCE OF CATEGORIES: ROSTER <a href="#">HHROSTER</a> | chkrsp_alt |

## R0. IMPACT EVALUATION / D. CHICKEN FLOCK

STATIC TEXT

*Now I will ask you questions about the chicken kept in this household. For all questions only consider chicken that the household is keeping now.*

|                                                                                                                                                                                       |                                                                                                                                                                                                                                                                        |
|---------------------------------------------------------------------------------------------------------------------------------------------------------------------------------------|------------------------------------------------------------------------------------------------------------------------------------------------------------------------------------------------------------------------------------------------------------------------|
| <p>D3. What type of chicken does your household currently keep?</p> <p>V1 self.Contains(-95) ? self.Length==1 : true<br/>M1 Option None can not be selected with other options</p>    | <p>MULTI-SELECT <span style="float: right;">chk_typ_nw</span></p> <p>01 <input type="checkbox"/> Broilers<br/>02 <input type="checkbox"/> Layers<br/>03 <input type="checkbox"/> Duals<br/>04 <input type="checkbox"/> Local<br/>-95 <input type="checkbox"/> None</p> |
| <p>D4. How many <u>broilers</u> does the household keep today? (include both chickens and chicks)</p> <p>E chk_typ_nw.Contains(1)<br/>V1 self&gt;0<br/>M1 Must be 0 or more</p>       | <p>NUMERIC: INTEGER <span style="float: right;">broilers_now</span></p> <p>-----</p> <p>SPECIAL VALUES</p> <p>00 NONE</p>                                                                                                                                              |
| <p>D5. How many <u>Layers</u> does the household keep today? (include both chickens and chicks)</p> <p>E chk_typ_nw.Contains(2)<br/>V1 self&gt;0<br/>M1 Must be 0 or more</p>         | <p>NUMERIC: INTEGER <span style="float: right;">layers_now</span></p> <p>-----</p> <p>SPECIAL VALUES</p> <p>00 NONE</p>                                                                                                                                                |
| <p>D6. How many <u>duals</u> does the household keep today? (include both chickens and chicks)</p> <p>E chk_typ_nw.Contains(3)<br/>V1 self&gt;0<br/>M1 Must be 0 or more</p>          | <p>NUMERIC: INTEGER <span style="float: right;">duals_now</span></p> <p>-----</p> <p>SPECIAL VALUES</p> <p>00 NONE</p>                                                                                                                                                 |
| <p>D7. How many <u>local chickens</u> does the household keep today? (include both chickens and chicks)</p> <p>E chk_typ_nw.Contains(4)<br/>V1 self&gt;0<br/>M1 Must be 0 or more</p> | <p>NUMERIC: INTEGER <span style="float: right;">local_now</span></p> <p>-----</p> <p>SPECIAL VALUES</p> <p>00 NONE</p>                                                                                                                                                 |
| <p>D8. What type of chicken did your household keep 3 months ago?</p> <p>V1 self.Contains(-95) ? self.Length==1 : true<br/>M1 Option None can not be selected with other options</p>  | <p>MULTI-SELECT <span style="float: right;">chk_typ_3m</span></p> <p>01 <input type="checkbox"/> Broilers<br/>02 <input type="checkbox"/> Layers<br/>03 <input type="checkbox"/> Duals<br/>04 <input type="checkbox"/> Local<br/>-95 <input type="checkbox"/> None</p> |

|                                                                                                                                                                                                                                                                                                                                                       |                                                                                                                                                          |
|-------------------------------------------------------------------------------------------------------------------------------------------------------------------------------------------------------------------------------------------------------------------------------------------------------------------------------------------------------|----------------------------------------------------------------------------------------------------------------------------------------------------------|
| <p>D9. How many <u>broilers</u> did your household keep 3 months ago, so %rcl3mt%,</p> <p>E chk_typ_3m.Contains(1)<br/> V1 \$chickenrange<br/> M1 Must be 0 or more; -99 if respondent doesn't know</p>                                                                                                                                               | <p>NUMERIC: INTEGER <span style="float: right;">broilers_3m</span></p> <p>-----</p> <p>SPECIAL VALUES</p> <p>00        NONE</p>                          |
| <p>D10. And how many <u>layers</u> did the household keep 3 months ago so %rcl3mt%</p> <p>E chk_typ_3m.Contains(2)<br/> V1 \$chickenrange<br/> M1 Must be 0 or more; -99 if respondent doesn't know</p>                                                                                                                                               | <p>NUMERIC: INTEGER <span style="float: right;">layers_3m</span></p> <p>-----</p> <p>SPECIAL VALUES</p> <p>00        NONE</p>                            |
| <p>D11. And how many <u>duals</u> did the household keep 3 months ago so %rcl3mt%</p> <p>I Include male and female duals.<br/> E chk_typ_3m.Contains(3)<br/> V1 \$chickenrange<br/> M1 Must be 0 or more; -99 if respondent doesn't know</p>                                                                                                          | <p>NUMERIC: INTEGER <span style="float: right;">duals_3m</span></p> <p>-----</p> <p>SPECIAL VALUES</p> <p>00        NONE</p>                             |
| <p>D12. And how many <u>local chickens</u> did the household keep 3 months ago so %rcl3mt%</p> <p>I Include male and female chicks.<br/> E chk_typ_3m.Contains(4)<br/> V1 \$chickenrange<br/> M1 Must be 0 or more; -99 if respondent doesn't know</p>                                                                                                | <p>NUMERIC: INTEGER <span style="float: right;">local_3m</span></p> <p>-----</p> <p>SPECIAL VALUES</p> <p>00        NONE</p>                             |
| <p>To confirm, you reported that your household currently owns a total of %flock_now% chickens.</p> <p>--&gt; %broilers_now_fl% broilers<br/> --&gt; %layers_now_fl% layers<br/> --&gt; %duals_now_fl% duals<br/> --&gt; %local_now_fl% local.</p> <p>Is this correct?</p> <p>V1 self==1<br/> M1 Correct any errors identified by the respondent.</p> | <p>SINGLE-SELECT <span style="float: right;">flock_now_sum</span></p> <p>01        <input type="radio"/> YES<br/> 02        <input type="radio"/> NO</p> |

To confirm, you reported that 3 months ago your household kept a total of %flock\_3m% chickens.

--> %broilers\_3m\_fl% broilers  
 --> %layers\_3m\_fl% layers  
 --> %duals\_3m\_fl% duals  
 --> %local\_3m\_fl% local.

Is this correct?

SINGLE-SELECT

flock\_3m\_sum

- 01  YES
- 02  NO

V1 self==1

M1 Correct any errors identified by the respondent.

|                                                                          |      |                 |
|--------------------------------------------------------------------------|------|-----------------|
| VARIABLE<br>new[] {broilers_3m}.Sum()                                    | LONG | broilers_3m_fl  |
| VARIABLE<br>new[] {layers_3m}.Sum()                                      | LONG | layers_3m_fl    |
| VARIABLE<br>new[] {duals_3m}.Sum()                                       | LONG | duals_3m_fl     |
| VARIABLE<br>new[] {local_3m}.Sum()                                       | LONG | local_3m_fl     |
| VARIABLE<br>new[] {broilers_now}.Sum()                                   | LONG | broilers_now_fl |
| VARIABLE<br>new[] {layers_now}.Sum()                                     | LONG | layers_now_fl   |
| VARIABLE<br>new[] {duals_now}.Sum()                                      | LONG | duals_now_fl    |
| VARIABLE<br>new[] {local_now}.Sum()                                      | LONG | local_now_fl    |
| VARIABLE<br>new[] {broilers_now, layers_now, duals_now, local_now}.Sum() | LONG | flock_now       |
| VARIABLE<br>new[] {broilers_3m, layers_3m, duals_3m, local_3m}.Sum()     | LONG | flock_3m        |

RO. IMPACT EVALUATION / D. CHICKEN  
**INTAKE**

|                                                                                                                                                                                                |                                                                                                                                                                                                                                                                                    |
|------------------------------------------------------------------------------------------------------------------------------------------------------------------------------------------------|------------------------------------------------------------------------------------------------------------------------------------------------------------------------------------------------------------------------------------------------------------------------------------|
| <p>D13. In the past 3 months, did any chicks hatch from the eggs in your household? Include any live chicks that hatched, even if it has died since.</p>                                       | <p>SINGLE-SELECT <span style="float: right;">chicks_yn</span></p> <p>01 <input type="radio"/> YES</p> <p>02 <input type="radio"/> NO</p>                                                                                                                                           |
| <p>D14. In the past 3 months, how many chicks hatched from the eggs in your household?</p> <p>E chicks_yn==1<br/>V1 \$exprange<br/>M1 Must be more than 0; -99 if respondent doesn't know.</p> | <p>NUMERIC: INTEGER <span style="float: right;">chick_hatched</span></p> <p>-----</p>                                                                                                                                                                                              |
| <p>D15. In the past 3 months, did the household <u>buy</u> any live chicken or chicks?</p>                                                                                                     | <p>SINGLE-SELECT <span style="float: right;">any_buy</span></p> <p>01 <input type="radio"/> YES</p> <p>02 <input type="radio"/> NO</p>                                                                                                                                             |
| <p>D16. In the past 3 months, did the household <u>buy any VDOCs</u>?</p> <p>E any_buy==1</p>                                                                                                  | <p>SINGLE-SELECT <span style="float: right;">vdoc_buy</span></p> <p>01 <input type="radio"/> YES</p> <p>02 <input type="radio"/> NO</p> <p>03 <input type="radio"/> I DON'T KNOW (IF THEY ARE VACCINATED)</p>                                                                      |
| <p>D16b. How many batches of VDOC did your household buy in the past 3 months?</p> <p>E vdoc_buy==1</p>                                                                                        | <p>NUMERIC: INTEGER <span style="float: right;">vdoc_batch</span></p> <p>-----</p>                                                                                                                                                                                                 |
| <p>D17. What type of VDOCs did you buy?</p> <p>E vdoc_buy==1</p>                                                                                                                               | <p>MULTI-SELECT <span style="float: right;">vdoc_type</span></p> <p>01 <input type="checkbox"/> Broilers</p> <p>02 <input type="checkbox"/> Layers</p> <p>03 <input type="checkbox"/> Duals</p>                                                                                    |
| <p>D18. Where did you buy these VDOCs?</p> <p>E vdoc_buy==1</p>                                                                                                                                | <p>MULTI-SELECT <span style="float: right;">vdoc_where</span></p> <p>01 <input type="checkbox"/> Hatchery</p> <p>02 <input type="checkbox"/> Distributor (Agrovets shop)</p> <p>03 <input type="checkbox"/> Another farmer</p> <p>-96 <input type="checkbox"/> Other (specify)</p> |
| <p>D19. SPECIFY OTHER</p> <p>E vdoc_where.ContainsAny(-96)</p>                                                                                                                                 | <p>TEXT <span style="float: right;">vdoc_buy_oth</span></p> <p>-----</p>                                                                                                                                                                                                           |

|                                                                                                                                                                                      |                                                                                                                                                                                                                                                                    |
|--------------------------------------------------------------------------------------------------------------------------------------------------------------------------------------|--------------------------------------------------------------------------------------------------------------------------------------------------------------------------------------------------------------------------------------------------------------------|
| <p>D20. How many of the VDOCs you bought were broilers?</p> <p>E vdoc_type.ContainsAny(1)<br/> V1 \$chickenrange<br/> M1 Must be 0 or more; -99 if respondent doesn't know</p>       | <p>NUMERIC: INTEGER <span style="float: right;">vdoc_bro</span></p> <p>-----</p> <p>SPECIAL VALUES</p> <p>00        NONE</p>                                                                                                                                       |
| <p>D21. How many of the VDOCs you bought were layers?</p> <p>E vdoc_type.ContainsAny(2)<br/> V1 \$chickenrange<br/> M1 Must be 0 or more; -99 if respondent doesn't know</p>         | <p>NUMERIC: INTEGER <span style="float: right;">vdoc_1yrs</span></p> <p>-----</p> <p>SPECIAL VALUES</p> <p>00        NONE</p>                                                                                                                                      |
| <p>D22. How many of the VDOCs you bought were duals?</p> <p>E vdoc_type.ContainsAny(3)<br/> V1 \$chickenrange<br/> M1 Must be 0 or more; -99 if respondent doesn't know</p>          | <p>NUMERIC: INTEGER <span style="float: right;">vdoc_duals</span></p> <p>-----</p> <p>SPECIAL VALUES</p> <p>00        NONE</p>                                                                                                                                     |
| <p>D23. In total, how much money was used to buy these VDOCs in the past 3 months?</p> <p>I Include all batches bought in the past 3 months<br/> E vdoc_buy==1</p>                   | <p>NUMERIC: INTEGER <span style="float: right;">vdoc_cost</span></p> <p>-----</p>                                                                                                                                                                                  |
| <p>D24. Apart from VDOCs, did you buy any other chickens or chicks in the last 3 months?</p> <p>E vdoc_buy==1</p>                                                                    | <p>SINGLE-SELECT <span style="float: right;">other_chck_buy</span></p> <p>01        <input type="radio"/> YES<br/> 02        <input type="radio"/> NO</p>                                                                                                          |
| <p>D24b. How many batches of DOC did your household buy in the past 3 months?</p> <p>E vdoc_buy==1 &amp;&amp; other_chck_buy==1    any_buy==1 &amp;&amp; vdoc_buy!=1</p>             | <p>NUMERIC: INTEGER <span style="float: right;">doc_batch</span></p> <p>-----</p>                                                                                                                                                                                  |
| <p>D25. In the past 3 months, what type of live chicken or chicks did your household buy?</p> <p>E vdoc_buy==1 &amp;&amp; other_chck_buy==1    any_buy==1 &amp;&amp; vdoc_buy!=1</p> | <p>MULTI-SELECT <span style="float: right;">chicken_type</span></p> <p>01        <input type="checkbox"/> Broilers<br/> 02        <input type="checkbox"/> Layers<br/> 03        <input type="checkbox"/> Duals<br/> 04        <input type="checkbox"/> Locals</p> |

|                                                                                                                                                                                                                                        |                                                                                                                                                                                                                                                                    |
|----------------------------------------------------------------------------------------------------------------------------------------------------------------------------------------------------------------------------------------|--------------------------------------------------------------------------------------------------------------------------------------------------------------------------------------------------------------------------------------------------------------------|
| <p>D26. How many chickens were broilers?</p> <p>E chicken_type.ContainsAny(1)<br/> V1 \$chickenrange<br/> M1 Must be 0 or more; -99 if respondent doesn't know</p>                                                                     | <p>NUMERIC: INTEGER <span style="float: right;">buy_bro</span></p> <p>-----</p> <p>SPECIAL VALUES</p> <p>00        NONE</p>                                                                                                                                        |
| <p>D27. How many chickens were layers?</p> <p>E chicken_type.ContainsAny(2)<br/> V1 \$chickenrange<br/> M1 Must be 0 or more; -99 if respondent doesn't know</p>                                                                       | <p>NUMERIC: INTEGER <span style="float: right;">buy_layers</span></p> <p>-----</p> <p>SPECIAL VALUES</p> <p>00        NONE</p>                                                                                                                                     |
| <p>D28. How many chickens were duals?</p> <p>E chicken_type.ContainsAny(3)<br/> V1 \$chickenrange<br/> M1 Must be 0 or more; -99 if respondent doesn't know</p>                                                                        | <p>NUMERIC: INTEGER <span style="float: right;">buy_duals</span></p> <p>-----</p> <p>SPECIAL VALUES</p> <p>00        NONE</p>                                                                                                                                      |
| <p>D29. How many chickens were locals?</p> <p>E chicken_type.ContainsAny(4)<br/> V1 \$chickenrange<br/> M1 Must be 0 or more; -99 if respondent doesn't know</p>                                                                       | <p>NUMERIC: INTEGER <span style="float: right;">buy_locals</span></p> <p>-----</p> <p>SPECIAL VALUES</p> <p>00        NONE</p>                                                                                                                                     |
| <p>D29b. In total, how much money was used to buy these chicks in the past 3 months?</p> <p>I Include all batches bought in the past 3 months<br/> E vdoc_buy==1 &amp;&amp; other_chck_buy==1    any_buy==1 &amp;&amp; vdoc_buy!=1</p> | <p>NUMERIC: INTEGER <span style="float: right;">chicks_cost</span></p> <p>-----</p>                                                                                                                                                                                |
| <p>D30. In the past 3 months, did the household receive any chicken or chicks <u>in any other way</u>? Example receiving as gift etc?</p>                                                                                              | <p>SINGLE-SELECT <span style="float: right;">any_rec</span></p> <p>01        <input type="radio"/> YES<br/> 02        <input type="radio"/> NO</p>                                                                                                                 |
| <p>D31. In the past 3 months, what type of live chicken or chicks did your household receive <u>in any other way</u>?</p> <p>E any_rec==1</p>                                                                                          | <p>MULTI-SELECT <span style="float: right;">any_rec_type</span></p> <p>01        <input type="checkbox"/> Broilers<br/> 02        <input type="checkbox"/> Layers<br/> 03        <input type="checkbox"/> Duals<br/> 04        <input type="checkbox"/> Locals</p> |

|                                                                                                                                                                                                                                                                                                                                                                                                |                                                                                                                                                       |
|------------------------------------------------------------------------------------------------------------------------------------------------------------------------------------------------------------------------------------------------------------------------------------------------------------------------------------------------------------------------------------------------|-------------------------------------------------------------------------------------------------------------------------------------------------------|
| <p>D32. How many broilers were received in other ways?</p> <p>E any_rec_type.ContainsAny(1)<br/> V1 \$chickenrange<br/> M1 Must be 0 or more; -99 if respondent doesn't know</p>                                                                                                                                                                                                               | <p>NUMERIC: INTEGER <span style="float:right">bro_rec</span></p> <p>-----</p> <p>SPECIAL VALUES</p> <p>00        NONE</p>                             |
| <p>D33. How many layers were received in other ways?</p> <p>E any_rec_type.ContainsAny(2)<br/> V1 \$chickenrange<br/> M1 Must be 0 or more; -99 if respondent doesn't know</p>                                                                                                                                                                                                                 | <p>NUMERIC: INTEGER <span style="float:right">lyrs_rec</span></p> <p>-----</p> <p>SPECIAL VALUES</p> <p>00        NONE</p>                            |
| <p>D34. How many duals were received in other ways?</p> <p>E any_rec_type.ContainsAny(3)<br/> V1 \$chickenrange<br/> M1 Must be 0 or more; -99 if respondent doesn't know</p>                                                                                                                                                                                                                  | <p>NUMERIC: INTEGER <span style="float:right">duals_rec</span></p> <p>-----</p> <p>SPECIAL VALUES</p> <p>00        NONE</p>                           |
| <p>D35. How many local chicken were received in other ways?</p> <p>E any_rec_type.ContainsAny(4)<br/> V1 \$chickenrange<br/> M1 Must be 0 or more; -99 if respondent doesn't know</p>                                                                                                                                                                                                          | <p>NUMERIC: INTEGER <span style="float:right">local_rec</span></p> <p>-----</p> <p>SPECIAL VALUES</p> <p>00        NONE</p>                           |
| <p>D36. How did you receive those chickens or chicks?</p> <p>E any_rec==1</p>                                                                                                                                                                                                                                                                                                                  | <p>TEXT <span style="float:right">any_rec_oth</span></p> <p>-----</p>                                                                                 |
| <p>To confirm, in the last 3 months your household gained a total %flock_in% chickens.</p> <p>--&gt; %bought% chickens were <u>bought</u><br/> --&gt; %rother% chickens were <u>received in other ways</u><br/> --&gt; %hatched% <u>chicks were hatched</u>.</p> <p>Is this correct?</p> <p>E IsAnswered(any_rec)<br/> V1 self==1<br/> M1 Correct any errors identified by the respondent.</p> | <p>SINGLE-SELECT <span style="float:right">flockint_sum</span></p> <p>01        <input type="radio"/> YES<br/> 02        <input type="radio"/> NO</p> |
| <p>VARIABLE</p> <p>new[] {vdoc_bro, buy_bro, bro_rec}.sum()</p>                                                                                                                                                                                                                                                                                                                                | <p>LONG <span style="float:right">bro_in</span></p>                                                                                                   |
| <p>VARIABLE</p> <p>new[] {vdoc_lyrs, buy_layers, lyrs_rec}.sum()</p>                                                                                                                                                                                                                                                                                                                           | <p>LONG <span style="float:right">layers_in</span></p>                                                                                                |

|                                                                                                      |      |          |
|------------------------------------------------------------------------------------------------------|------|----------|
| VARIABLE<br>new[] {vdoc_duals, buy_duals, duals_rec}.Sum()                                           | LONG | duals_in |
| VARIABLE<br>new[] {chick_hatched, buy_local, local_rec}.Sum()                                        | LONG | local_in |
| VARIABLE<br>new[] {vdoc_bro, vdoc_lyrs, vdoc_duals, buy_bro, buy_layers, buy_duals, buy_local}.Sum() | LONG | bought   |
| VARIABLE<br>new[] {bro_rec, lyrs_rec, duals_rec, local_rec}.Sum()                                    | LONG | rother   |
| VARIABLE<br>new[] {chick_hatched}.Sum()                                                              | LONG | hatched  |
| VARIABLE<br>new[] {bro_in, layers_in, duals_in, local_in}.Sum()                                      | LONG | flock_in |

R0. IMPACT EVALUATION / D. CHICKEN  
OFFTAKE

|                                                                                                             |                                                                                                                                                       |               |
|-------------------------------------------------------------------------------------------------------------|-------------------------------------------------------------------------------------------------------------------------------------------------------|---------------|
| D37. In the past 3 months, did the household <u>sell any live</u> chicken or chicks?                        | SINGLE-SELECT                                                                                                                                         | any_sale      |
|                                                                                                             | 01 <input type="radio"/> YES<br>02 <input type="radio"/> NO                                                                                           |               |
| D38. In the past 3 months, what type of live chicken or chicks did your household sell?                     | MULTI-SELECT                                                                                                                                          | chk_type_sell |
| E any_sale==1                                                                                               | 01 <input type="checkbox"/> Broilers<br>02 <input type="checkbox"/> Layers<br>03 <input type="checkbox"/> Duals<br>04 <input type="checkbox"/> Locals |               |
| D39. How many broilers were sold live?                                                                      | NUMERIC: INTEGER                                                                                                                                      | bro_sale      |
| E chk_type_sell.ContainsAny(1)<br>V1 \$chickenrange<br>M1 Must be 0 or more; -99 if respondent doesn't know | -----<br>SPECIAL VALUES<br>00 NONE                                                                                                                    |               |
| D40. How many layers were sold live?                                                                        | NUMERIC: INTEGER                                                                                                                                      | layers_sale   |
| E chk_type_sell.ContainsAny(2)<br>V1 \$chickenrange<br>M1 Must be 0 or more; -99 if respondent doesn't know | -----<br>SPECIAL VALUES<br>00 NONE                                                                                                                    |               |

|                                                                                                                                                                                                                         |                                                                                                                              |
|-------------------------------------------------------------------------------------------------------------------------------------------------------------------------------------------------------------------------|------------------------------------------------------------------------------------------------------------------------------|
| <p>D41. How many duals were sold live?</p> <p>E chk_type_sell.ContainsAny(3)<br/> V1 \$chickenrange<br/> M1 Must be 0 or more; -99 if respondent doesn't know</p>                                                       | <p>NUMERIC: INTEGER <span style="float: right;">duals_sale</span></p> <p>-----</p> <p>SPECIAL VALUES<br/> 00        NONE</p> |
| <p>D42. How many local chickens were sold live?</p> <p>E chk_type_sell.ContainsAny(4)<br/> V1 \$chickenrange<br/> M1 Must be 0 or more; -99 if respondent doesn't know</p>                                              | <p>NUMERIC: INTEGER <span style="float: right;">local_sale</span></p> <p>-----</p> <p>SPECIAL VALUES<br/> 00        NONE</p> |
| <p>D43. In total, how much money was received from selling these %bro_sale% broilers?</p> <p>I In TSh.<br/> E bro_sale&gt;0<br/> V1 \$exprange<br/> M1 Must be more than 0; -99 if respondent doesn't know</p>          | <p>NUMERIC: INTEGER <span style="float: right;">bro_rev</span></p> <p>-----</p>                                              |
| <p>D44. In total, how much money was received from selling these %layers_sale% layers?</p> <p>I In TSh.<br/> E layers_sale&gt;0<br/> V1 \$exprange<br/> M1 Must be more than 0; -99 if respondent doesn't know</p>      | <p>NUMERIC: INTEGER <span style="float: right;">layers_rev</span></p> <p>-----</p>                                           |
| <p>D45. In total, how much money was received from selling these %duals_sale% duals?</p> <p>I In TSh.<br/> E duals_sale&gt;0<br/> V1 \$exprange<br/> M1 Must be more than 0; -99 if respondent doesn't know</p>         | <p>NUMERIC: INTEGER <span style="float: right;">duals_rev</span></p> <p>-----</p>                                            |
| <p>D46. In total, how much money was received from selling these %local_sale% local chicken?</p> <p>I In TSh.<br/> E local_sale&gt;0<br/> V1 \$exprange<br/> M1 Must be more than 0; -99 if respondent doesn't know</p> | <p>NUMERIC: INTEGER <span style="float: right;">local_rev</span></p> <p>-----</p>                                            |

|                                                                                                                                                                                                         |                                                                                                                                                                                                                                                                                                                                                                                                                                                                                                                                                                                                           |
|---------------------------------------------------------------------------------------------------------------------------------------------------------------------------------------------------------|-----------------------------------------------------------------------------------------------------------------------------------------------------------------------------------------------------------------------------------------------------------------------------------------------------------------------------------------------------------------------------------------------------------------------------------------------------------------------------------------------------------------------------------------------------------------------------------------------------------|
| <p>D47. In the past 3 months, to whom did you sell most of these chicken or chickens?</p> <p>E any_sale==1</p>                                                                                          | <p>SINGLE-SELECT <span style="float: right;">chk_buyer</span></p> <p>01 <input type="radio"/> HOUSEHOLD IN THE VILLAGE/MTAA</p> <p>02 <input type="radio"/> HOUSEHOLD OUTSIDE THE VILLAGE/MTAA</p> <p>03 <input type="radio"/> A RESTAURANT IN THE VILLAGE/MTAA</p> <p>04 <input type="radio"/> A RESTAURANT OUTSIDE THE VILLAGE/MTAA</p> <p>05 <input type="radio"/> TRADER IN THE LOCAL MARKET</p> <p>06 <input type="radio"/> TRADER IN ANOTHER MARKET</p> <p>07 <input type="radio"/> A SHOP</p> <p>08 <input type="radio"/> PROCESSING INDUSTRY</p> <p>-96 <input type="radio"/> OTHER (SPECIFY)</p> |
| <p>D48. SPECIFY OTHER</p> <p>E chk_buyer== -96</p>                                                                                                                                                      | <p>TEXT <span style="float: right;">chk_buyer_oth</span></p> <p>.....</p>                                                                                                                                                                                                                                                                                                                                                                                                                                                                                                                                 |
| <p>D49. In the past 3 months, did the household <u>slaughter any chicken to sell their meat or organs?</u></p> <p>I Includes sale of cooked and uncooked meat or organs.</p>                            | <p>SINGLE-SELECT <span style="float: right;">any_slaughter</span></p> <p>01 <input type="radio"/> YES -&gt; RECORD AS BUSINESS</p> <p>02 <input type="radio"/> NO</p>                                                                                                                                                                                                                                                                                                                                                                                                                                     |
| <p>D50. In the past 3 months, what type of live chicken or chicks did your household slaughter for meat or organs?</p> <p>E any_slaughter==1</p>                                                        | <p>MULTI-SELECT <span style="float: right;">any_slaughter_type</span></p> <p>01 <input type="checkbox"/> Broilers</p> <p>02 <input type="checkbox"/> Layers</p> <p>03 <input type="checkbox"/> Duals</p> <p>04 <input type="checkbox"/> Locals</p>                                                                                                                                                                                                                                                                                                                                                        |
| <p>D51. How many broilers were slaughtered for meat or organ sales?</p> <p>E any_slaughter_type.ContainsAny(1)</p> <p>V1 \$chickenrange</p> <p>M1 Must be 0 or more; -99 if respondent doesn't know</p> | <p>NUMERIC: INTEGER <span style="float: right;">bro_slaughter</span></p> <p>-----</p> <p>SPECIAL VALUES</p> <p>00 NONE</p>                                                                                                                                                                                                                                                                                                                                                                                                                                                                                |
| <p>D52. How many layers were slaughtered for meat or organ sales?</p> <p>E any_slaughter_type.ContainsAny(2)</p> <p>V1 \$chickenrange</p> <p>M1 Must be 0 or more; -99 if respondent doesn't know</p>   | <p>NUMERIC: INTEGER <span style="float: right;">layers_slaughter</span></p> <p>-----</p> <p>SPECIAL VALUES</p> <p>00 NONE</p>                                                                                                                                                                                                                                                                                                                                                                                                                                                                             |

|                                                                                                                                                                                                          |                                                                                                                                                                                                     |
|----------------------------------------------------------------------------------------------------------------------------------------------------------------------------------------------------------|-----------------------------------------------------------------------------------------------------------------------------------------------------------------------------------------------------|
| <p><b>D53. How many duals were slaughtered for meat or organ sales?</b></p> <p>E any_slaughter_type.ContainsAny(3)<br/> V1 \$chickenrange<br/> M1 Must be 0 or more; -99 if respondent doesn't know</p>  | <p>NUMERIC: INTEGER duals_slaughter</p> <p>-----</p> <p>SPECIAL VALUES</p> <p>00 NONE</p>                                                                                                           |
| <p><b>D54. How many locals were slaughtered for meat or organ sales?</b></p> <p>E any_slaughter_type.ContainsAny(4)<br/> V1 \$chickenrange<br/> M1 Must be 0 or more; -99 if respondent doesn't know</p> | <p>NUMERIC: INTEGER local_slaughter</p> <p>-----</p> <p>SPECIAL VALUES</p> <p>00 NONE</p>                                                                                                           |
| <p><b>D55. In the past 3 months, did the household give away as a gift or payment any chicken or chicks?</b></p>                                                                                         | <p>SINGLE-SELECT any_ggf</p> <p>01 <input type="radio"/> YES<br/> 02 <input type="radio"/> NO</p>                                                                                                   |
| <p><b>D56. In the past 3 months, what type of chicken or chicks did your household give away as gift?</b></p> <p>E any_ggf==1</p>                                                                        | <p>MULTI-SELECT any_ggf_type</p> <p>01 <input type="checkbox"/> Broilers<br/> 02 <input type="checkbox"/> Layers<br/> 03 <input type="checkbox"/> Duals<br/> 04 <input type="checkbox"/> Locals</p> |
| <p><b>D57. How many broilers were given away as gifts or as payment?</b></p> <p>E any_ggf_type.ContainsAny(1)<br/> V1 \$chickenrange<br/> M1 Must be 0 or more; -99 if respondent doesn't know</p>       | <p>NUMERIC: INTEGER bro_ggf</p> <p>-----</p> <p>SPECIAL VALUES</p> <p>00 NONE</p>                                                                                                                   |
| <p><b>D58. How many layers were given away as gifts or as payment?</b></p> <p>E any_ggf_type.ContainsAny(2)<br/> V1 \$chickenrange<br/> M1 Must be 0 or more; -99 if respondent doesn't know</p>         | <p>NUMERIC: INTEGER layers_ggf</p> <p>-----</p> <p>SPECIAL VALUES</p> <p>00 NONE</p>                                                                                                                |
| <p><b>D59. How many duals were given away as gifts or as payment?</b></p> <p>E any_ggf_type.ContainsAny(3)<br/> V1 \$chickenrange<br/> M1 Must be 0 or more; -99 if respondent doesn't know</p>          | <p>NUMERIC: INTEGER duals_ggf</p> <p>-----</p> <p>SPECIAL VALUES</p> <p>00 NONE</p>                                                                                                                 |
| <p><b>D60. How many locals were given away as gifts or as payment?</b></p> <p>E any_ggf_type.ContainsAny(4)<br/> V1 \$chickenrange<br/> M1 Must be 0 or more; -99 if respondent doesn't know</p>         | <p>NUMERIC: INTEGER local_ggf</p> <p>-----</p> <p>SPECIAL VALUES</p> <p>00 NONE</p>                                                                                                                 |

|                                                                                                                                                                                            |                                                                                                                                                                                                                                               |
|--------------------------------------------------------------------------------------------------------------------------------------------------------------------------------------------|-----------------------------------------------------------------------------------------------------------------------------------------------------------------------------------------------------------------------------------------------|
| <p>D61. In the past 3 months, did the household slaughter any chicken <u>for household consumption</u>?</p>                                                                                | <p>SINGLE-SELECT <span style="float: right;">any_cons</span></p> <p>01 <input type="radio"/> YES</p> <p>02 <input type="radio"/> NO</p>                                                                                                       |
| <p>D62. In the past 3 months, what type of chicken or chicks did your household slaughter for consumption?</p> <p>E any_cons==1</p>                                                        | <p>MULTI-SELECT <span style="float: right;">any_cons_type</span></p> <p>01 <input type="checkbox"/> Broilers</p> <p>02 <input type="checkbox"/> Layers</p> <p>03 <input type="checkbox"/> Duals</p> <p>04 <input type="checkbox"/> Locals</p> |
| <p>D63. How many broilers were slaughtered for consumption?</p> <p>E any_cons_type.ContainsAny(1)</p> <p>V1 \$chickenrange</p> <p>M1 Must be 0 or more; -99 if respondent doesn't know</p> | <p>NUMERIC: INTEGER <span style="float: right;">bro_cons</span></p> <p>-----</p> <p>SPECIAL VALUES</p> <p>00 NONE</p>                                                                                                                         |
| <p>D64. How many layers were slaughtered for consumption?</p> <p>E any_cons_type.ContainsAny(2)</p> <p>V1 \$chickenrange</p> <p>M1 Must be 0 or more; -99 if respondent doesn't know</p>   | <p>NUMERIC: INTEGER <span style="float: right;">layers_cons</span></p> <p>-----</p> <p>SPECIAL VALUES</p> <p>00 NONE</p>                                                                                                                      |
| <p>D65. How many duals were slaughtered for consumption?</p> <p>E any_cons_type.ContainsAny(3)</p> <p>V1 \$chickenrange</p> <p>M1 Must be 0 or more; -99 if respondent doesn't know</p>    | <p>NUMERIC: INTEGER <span style="float: right;">duals_cons</span></p> <p>-----</p> <p>SPECIAL VALUES</p> <p>00 NONE</p>                                                                                                                       |
| <p>D66. How many locals were slaughtered for consumption?</p> <p>E any_cons_type.ContainsAny(4)</p> <p>V1 \$chickenrange</p> <p>M1 Must be 0 or more; -99 if respondent doesn't know</p>   | <p>NUMERIC: INTEGER <span style="float: right;">local_cons</span></p> <p>-----</p> <p>SPECIAL VALUES</p> <p>00 NONE</p>                                                                                                                       |
| <p>D67. In the past 3 months, did any chicken or chick <u>die for any reason</u>, such as disease or parasites, lack of food or water, killed by an animal, heat/cold etc.?</p>            | <p>SINGLE-SELECT <span style="float: right;">any_die</span></p> <p>01 <input type="radio"/> YES</p> <p>02 <input type="radio"/> NO</p>                                                                                                        |
| <p>D68. In the past 3 months, what type of chicken or chicks died for any reason?</p> <p>E any_die==1</p>                                                                                  | <p>MULTI-SELECT <span style="float: right;">any_die_type</span></p> <p>01 <input type="checkbox"/> Broilers</p> <p>02 <input type="checkbox"/> Layers</p> <p>03 <input type="checkbox"/> Duals</p> <p>04 <input type="checkbox"/> Locals</p>  |

|                                                                                                                                                           |                                                                                                                                                                                                                                                                                                                                                                                                                                                                                                                                                                                                                                                                                                                                                                                                  |
|-----------------------------------------------------------------------------------------------------------------------------------------------------------|--------------------------------------------------------------------------------------------------------------------------------------------------------------------------------------------------------------------------------------------------------------------------------------------------------------------------------------------------------------------------------------------------------------------------------------------------------------------------------------------------------------------------------------------------------------------------------------------------------------------------------------------------------------------------------------------------------------------------------------------------------------------------------------------------|
| <p>D69. How many broilers died?</p> <p>E any_die_type.ContainsAny(1)<br/> V1 \$chickenrange<br/> M1 Must be 0 or more; -99 if respondent doesn't know</p> | <p>NUMERIC: INTEGER <span style="float: right;">bro_die</span></p> <p>-----</p> <p>SPECIAL VALUES</p> <p>00        NONE</p>                                                                                                                                                                                                                                                                                                                                                                                                                                                                                                                                                                                                                                                                      |
| <p>D70. How many layers died?</p> <p>E any_die_type.ContainsAny(2)<br/> V1 \$chickenrange<br/> M1 Must be 0 or more; -99 if respondent doesn't know</p>   | <p>NUMERIC: INTEGER <span style="float: right;">layers_die</span></p> <p>-----</p> <p>SPECIAL VALUES</p> <p>00        NONE</p>                                                                                                                                                                                                                                                                                                                                                                                                                                                                                                                                                                                                                                                                   |
| <p>D71. How many duals died?</p> <p>E any_die_type.ContainsAny(3)<br/> V1 \$chickenrange<br/> M1 Must be 0 or more; -99 if respondent doesn't know</p>    | <p>NUMERIC: INTEGER <span style="float: right;">duals_die</span></p> <p>-----</p> <p>SPECIAL VALUES</p> <p>00        NONE</p>                                                                                                                                                                                                                                                                                                                                                                                                                                                                                                                                                                                                                                                                    |
| <p>D72. How many locals died?</p> <p>E any_die_type.ContainsAny(4)<br/> V1 \$chickenrange<br/> M1 Must be 0 or more; -99 if respondent doesn't know</p>   | <p>NUMERIC: INTEGER <span style="float: right;">local_die</span></p> <p>-----</p> <p>SPECIAL VALUES</p> <p>00        NONE</p>                                                                                                                                                                                                                                                                                                                                                                                                                                                                                                                                                                                                                                                                    |
| <p>D73. In the past 3 months, what caused these broilers, layers, duals or locals to die?</p> <p>I Probe and select all that apply.<br/> E any_die==1</p> | <p>MULTI-SELECT <span style="float: right;">anydie_rsn</span></p> <p>01        <input type="checkbox"/> LACK OF FOOD</p> <p>02        <input type="checkbox"/> LACK OF WATER</p> <p>03        <input type="checkbox"/> WORMS OR PARASITES</p> <p>04        <input type="checkbox"/> INFECTIOUS CORYZA</p> <p>05        <input type="checkbox"/> FOWL POX</p> <p>06        <input type="checkbox"/> GUMBORO</p> <p>07        <input type="checkbox"/> MAREK'S DISEASE</p> <p>08        <input type="checkbox"/> NEWCASTLE DISEASE</p> <p>09        <input type="checkbox"/> WEATHER (RAIN, FLOODS, WIND, ETC.)</p> <p>10        <input type="checkbox"/> DIED AS A CHICK</p> <p>11        <input type="checkbox"/> UNKNOWN DISEASE</p> <p>-96        <input type="checkbox"/> OTHER (SPECIFY)</p> |
| <p>D74. SPECIFY OTHER</p> <p>E anydie_rsn.Contains(-96)</p>                                                                                               | <p>TEXT <span style="float: right;">anydie_rsn_oth</span></p> <p>-----</p>                                                                                                                                                                                                                                                                                                                                                                                                                                                                                                                                                                                                                                                                                                                       |

|                                                                                                                                                                                                                                                                                              |                                                                                                                                                                                                                                               |
|----------------------------------------------------------------------------------------------------------------------------------------------------------------------------------------------------------------------------------------------------------------------------------------------|-----------------------------------------------------------------------------------------------------------------------------------------------------------------------------------------------------------------------------------------------|
| <p>D75. In the past 3 months, did the household lose any chicken or chicks <u>in any other way?</u></p> <p>W1 self==2</p> <p>M1 Double check they were not sold, consumed, given as gift or payment, died because of ND or any other reason. If so, record in respective category above.</p> | <p>SINGLE-SELECT <span style="float: right;">any_lose</span></p> <p>01 <input type="radio"/> YES</p> <p>02 <input type="radio"/> NO</p>                                                                                                       |
| <p>D76. In the past 3 months, what type of chicken or chicks did you lose in other ways?</p> <p>E any_lose==1</p>                                                                                                                                                                            | <p>MULTI-SELECT <span style="float: right;">any_lose_type</span></p> <p>01 <input type="checkbox"/> Broilers</p> <p>02 <input type="checkbox"/> Layers</p> <p>03 <input type="checkbox"/> Duals</p> <p>04 <input type="checkbox"/> Locals</p> |
| <p>D77. How many broilers were lost in other ways?</p> <p>E any_lose_type.ContainsAny(1)</p> <p>V1 \$chickenrange</p> <p>M1 Must be 0 or more; -99 if respondent doesn't know</p>                                                                                                            | <p>NUMERIC: INTEGER <span style="float: right;">bro_lose</span></p> <p>-----</p> <p>SPECIAL VALUES</p> <p>00 NONE</p>                                                                                                                         |
| <p>D78. How many layers were lost in other ways?</p> <p>E any_lose_type.ContainsAny(2)</p> <p>V1 \$chickenrange</p> <p>M1 Must be 0 or more; -99 if respondent doesn't know</p>                                                                                                              | <p>NUMERIC: INTEGER <span style="float: right;">layers_lose</span></p> <p>-----</p> <p>SPECIAL VALUES</p> <p>00 NONE</p>                                                                                                                      |
| <p>D79. How many duals were lost in other ways?</p> <p>E any_lose_type.ContainsAny(3)</p> <p>V1 \$chickenrange</p> <p>M1 Must be 0 or more; -99 if respondent doesn't know</p>                                                                                                               | <p>NUMERIC: INTEGER <span style="float: right;">duals_lose</span></p> <p>-----</p> <p>SPECIAL VALUES</p> <p>00 NONE</p>                                                                                                                       |
| <p>D80. How many locals were lost in other ways?</p> <p>E any_lose_type.ContainsAny(4)</p> <p>V1 \$chickenrange</p> <p>M1 Must be 0 or more; -99 if respondent doesn't know</p>                                                                                                              | <p>NUMERIC: INTEGER <span style="float: right;">locals_lose</span></p> <p>-----</p> <p>SPECIAL VALUES</p> <p>00 NONE</p>                                                                                                                      |
| <p>D81. How did you lose these chickens or chicks?</p> <p>E any_lose_type.ContainsAny(4)</p>                                                                                                                                                                                                 | <p>TEXT <span style="float: right;">any_lose_oth</span></p> <p>.....</p>                                                                                                                                                                      |

D82. If your household would sell one broiler today in the nearest market, how much would your household receive?

NUMERIC: INTEGER

broiler\_prc

-----

I In TSh.

E chk\_typ\_nw.Contains(1)

V1 self>=2500 && self<=40000

M1 Price cannot be less than 2,500 TSh or more than 40,000 TSh.

D83. If your household would sell one layer today in the nearest market, how much would your household receive?

NUMERIC: INTEGER

layer\_prc

-----

I In TSh.

E chk\_typ\_nw.Contains(2)

V1 self>=2500 && self<=40000

M1 Price cannot be less than 2,500 TSh or more than 40,000 TSh.

D84. And how much would your household receive for selling one dual in the nearest market?

NUMERIC: INTEGER

duals\_prc

-----

I In TSh.

E chk\_typ\_nw.Contains(3)

V1 self>=2500 && self<=40000

M1 Price cannot be less than 2,500 TSh or more than 20,000 TSh.

D85. And how much would your household receive for selling one local in the nearest market?

NUMERIC: INTEGER

local\_prc

-----

I In TSh.

E chk\_typ\_nw.Contains(4)

V1 self>=2500 && self<=40000

M1 Price cannot be less than 2,500 TSh or more than 40,000 TSh.

To confirm, a total %flock\_out% chicken  
s left your flock in the last 3 months.

--> %sold% chickens were sold live  
--> %meat% chickens were slaughtered  
for meat sales  
--> %ggf% chickens were given as gifts  
--> %cons% chickens were slaughtered  
for consumption  
--> %dth% chickens died from other cau  
ses  
--> %lost% chickens were lost in other w  
ays.

Is this correct?

E IsAnswered(any\_lose)

V1 self==1

M1 Correct any errors identified by the respondent.

SINGLE-SELECT

flockoff\_sum

01  YES

02  NO

|                                                                                                           |      |            |
|-----------------------------------------------------------------------------------------------------------|------|------------|
| VARIABLE<br>new[] {bro_sale, bro_ggf, bro_slaughter, bro_cons, bro_die, bro_lose}.Sum()                   | LONG | bro_out    |
| VARIABLE<br>new[] {layers_sale, layers_ggf, layers_slaughter, layers_cons, layers_die, layers_lose}.Sum() | LONG | layers_out |
| VARIABLE<br>new[] {duals_sale, duals_ggf, duals_slaughter, duals_cons, duals_die, duals_lose}.Sum()       | LONG | duals_out  |
| VARIABLE<br>new[] {local_sale, local_ggf, local_slaughter, local_cons, local_die, locals_lose}.Sum()      | LONG | locals_out |
| VARIABLE<br>new[] {bro_out, layers_out, duals_out, locals_out}.Sum()                                      | LONG | flock_out  |
| VARIABLE<br>new[] {bro_sale, layers_sale, duals_sale, local_sale}.Sum()                                   | LONG | sold       |
| VARIABLE<br>new[] {bro_ggf, layers_ggf, duals_ggf, local_ggf}.Sum()                                       | LONG | ggf        |
| VARIABLE<br>new[] {bro_slaughter, layers_slaughter, duals_slaughter, local_slaughter}.Sum()               | LONG | meat       |
| VARIABLE<br>new[] {bro_cons, layers_cons, duals_cons, local_cons}.Sum()                                   | LONG | cons       |

|                                                                                                                                                                                                |        |             |
|------------------------------------------------------------------------------------------------------------------------------------------------------------------------------------------------|--------|-------------|
| VARIABLE<br>new[] {bro_die, layers_die, duals_die, local_die}.Sum()                                                                                                                            | LONG   | dth         |
| VARIABLE<br>new[] {bro_lose, layers_lose, duals_lose, locals_lose}.Sum()                                                                                                                       | LONG   | lost        |
| VARIABLE<br>broilers_3m_fl+bro_in-bro_out                                                                                                                                                      | LONG   | bro_cal     |
| VARIABLE<br>layers_3m_fl+layers_in-layers_out                                                                                                                                                  | LONG   | layers_cal  |
| VARIABLE<br>duals_3m_fl+duals_in-duals_out                                                                                                                                                     | LONG   | duals_cal   |
| VARIABLE<br>local_3m_fl+local_in-locals_out                                                                                                                                                    | LONG   | local_cal   |
| VARIABLE<br>Math.Abs((int)broilers_now_fl-(int)bro_cal)                                                                                                                                        | LONG   | bro_dif     |
| VARIABLE<br>Math.Abs((int)layers_now_fl-(int)layers_cal)                                                                                                                                       | LONG   | layers_dif  |
| VARIABLE<br>Math.Abs((int)duals_now_fl-(int)duals_cal)                                                                                                                                         | LONG   | duals_dif   |
| VARIABLE<br>Math.Abs((int)local_now_fl-(int)local_cal)                                                                                                                                         | LONG   | local_dif   |
| VARIABLE<br>String.Concat( chicks_yn == 1 ? "hatched" : "", any_buy == 1 ? ", purchased" : "", any_rec == 1 ? ", recieved in other ways" : "" )                                                | STRING | intake_st   |
| VARIABLE<br>String.Concat( any_sale == 1    any_slaughter == 1 ? "sold" : "", any_ggf == 1 ? ", gifted" : "", any_cons == 1 ? ", consumed" : "", any_die==1    any_lose == 1 ? ", lost" : "" ) | STRING | offtake_st  |
| VARIABLE<br>new[] {bro_sale}.Sum()                                                                                                                                                             | LONG   | sold_bro    |
| VARIABLE<br>new[] {layers_sale}.Sum()                                                                                                                                                          | LONG   | sold_layers |
| VARIABLE<br>new[] {duals_sale}.Sum()                                                                                                                                                           | LONG   | sold_duals  |

|                                            |      |             |
|--------------------------------------------|------|-------------|
| VARIABLE<br>new[] {local_sale}.Sum()       | LONG | sold_local  |
| VARIABLE<br>new[] {bro_ggf}.Sum()          | LONG | ggf_bro     |
| VARIABLE<br>new[] {layers_ggf}.Sum()       | LONG | ggf_layers  |
| VARIABLE<br>new[] {duals_ggf}.Sum()        | LONG | ggf_duals   |
| VARIABLE<br>new[] {local_ggf}.Sum()        | LONG | ggf_local   |
| VARIABLE<br>new[] {bro_slaughter}.Sum()    | LONG | meat_bro    |
| VARIABLE<br>new[] {layers_slaughter}.Sum() | LONG | meat_layers |
| VARIABLE<br>new[] {duals_slaughter}.Sum()  | LONG | meat_duals  |
| VARIABLE<br>new[] {local_slaughter}.Sum()  | LONG | meat_local  |
| VARIABLE<br>new[] {bro_cons}.Sum()         | LONG | cons_bro    |
| VARIABLE<br>new[] {layers_cons}.Sum()      | LONG | cons_layers |
| VARIABLE<br>new[] {duals_cons}.Sum()       | LONG | cons_duals  |
| VARIABLE<br>new[] {local_cons}.Sum()       | LONG | cons_local  |
| VARIABLE<br>new[] {bro_die}.Sum()          | LONG | dth_bro     |
| VARIABLE<br>new[] {layers_die}.Sum()       | LONG | dth_layers  |
| VARIABLE<br>new[] {duals_die}.Sum()        | LONG | dth_duals   |
| VARIABLE<br>new[] {local_die}.Sum()        | LONG | dth_local   |
| VARIABLE<br>new[] {bro_lose}.Sum()         | LONG | lost_bro    |

|                                              |        |             |
|----------------------------------------------|--------|-------------|
| VARIABLE<br>new[] {layers_lose}.Sum()        | LONG   | lost_layers |
| VARIABLE<br>new[] {duals_lose}.Sum()         | LONG   | lost_duals  |
| VARIABLE<br>new[] {locals_lose}.Sum()        | LONG   | lost_local  |
| VARIABLE<br>new[] {buy_bro}.Sum()            | LONG   | bgt_bro     |
| VARIABLE<br>new[] {buy_layers}.Sum()         | LONG   | bgt_layers  |
| VARIABLE<br>new[] {buy_duals}.Sum()          | LONG   | bgt_duals   |
| VARIABLE<br>new[] {buy_local}.Sum()          | LONG   | bgt_locals  |
| VARIABLE<br>new[] {bro_rec}.Sum()            | LONG   | roth_bro    |
| VARIABLE<br>new[] {lyrs_rec}.Sum()           | LONG   | roth_layers |
| VARIABLE<br>new[] {duals_rec}.Sum()          | LONG   | roth_duals  |
| VARIABLE<br>new[] {local_rec}.Sum()          | LONG   | roth_local  |
| VARIABLE<br>(double)bro_dif/broilers_now_f1  | DOUBLE | bro_diff    |
| VARIABLE<br>(double)layers_dif/layers_now_f1 | DOUBLE | layers_diff |
| VARIABLE<br>(double)duals_dif/duals_now_f1   | DOUBLE | duals_diff  |
| VARIABLE<br>(double)local_dif/local_now_f1   | DOUBLE | local_diff  |

STATIC TEXT

E (bro\_diff>0.2 && broilers\_now\_fl>0) && bro\_dif>=2

**BROILERS**

The number of *broilers* are not adding up. To check this, please tell me if this summary is correct.

3 months ago, your household *owned %broilers\_3m\_fl% broilers*

In the last 3 months, your household then *added %bro\_in% broilers* to the flock:

- > %bgt\_bro% broilers were *bought*
- > %roth\_bro% broilers were *received in other ways*

In the last 3 months, your household also *lost %bro\_out% broilers* from the flock:

- > %sold\_bro% broilers were *sold live*
- > %meat\_bro% broilers were *slaughtered for meat sales*
- > %ggf\_bro% broilers were *given as gifts*
- > %cons\_bro% broilers were *slaughtered for consumption*
- > %dth\_bro% broilers *died from other causes*
- > %lost\_bro% broilers were *lost in other ways*.

**DID YOU REVIEW THE NUMBERS AND MAKE THE CORRECTIONS?**

SINGLE-SELECT

bro\_sum

- 01  YES -> REVIEWED AND MADE CORRECTIONS
- 02  NO -> REVIEWED BUT UNABLE TO MAKE CORRECTIONS

E (bro\_diff>0.2 && broilers\_now\_fl>0) && bro\_dif>=2

STATIC TEXT

E (layers\_diff>0.2 && layers\_now\_fl>0) && layers\_dif>=2

**LAYERS**

The number of *layers* are not adding up. To check this, please tell me if this summary is correct.

3 months ago, your household *owned %layers\_3m\_fl% layers*

In the last 3 months, your household then *added %layers\_in% layers* to the flock:

- > %bgt\_layers% layers were *bought*
- > %roth\_layers% layers were *received in other ways*

In the last 3 months, your household also *lost %layers\_out% layers* from the flock:

- > %sold\_layers% layers were *sold live*
- > %meat\_layers% layers were *slaughtered for meat sales*
- > %ggf\_layers% layers were *given as gifts*
- > %cons\_layers% layers were *slaughtered for consumption*
- > %dth\_layers% layers *died from other causes*
- > %lost\_layers% layers were *lost in other ways*.

**DID YOU REVIEW THE NUMBERS AND MAKE THE CORRECTIONS?**

SINGLE-SELECT

layers\_sum

E (layers\_diff>0.2 && layers\_now\_f1>0) && layers\_dif>=2

- 01  YES -> REVIEWED AND MADE CORRECTIONS
- 02  NO -> REVIEWED BUT UNABLE TO MAKE CORRECTIONS

STATIC TEXT

E (duals\_diff>0.2 && duals\_now\_f1>0) && duals\_dif>=2

**DUALS**

*The number of **duals** are not adding up. To check this, please tell me if this summary is correct.*

*3 months ago, your household **owned %duals\_3m\_f1% duals***

*In the last 3 months, your household then **added %duals\_in% duals** to the flock:*

*-> %bgt\_duals% duals were **bought***

*-> %roth\_duals% duals were **received in other ways***

*In the last 3 months, your household also **lost %duals\_out% duals** from the flock:*

*-> %sold\_duals% duals were **sold live***

*-> %meat\_duals% duals were **slaughtered for meat sales***

*-> %ggf\_duals% duals were **given as gifts***

*-> %cons\_duals% duals were **slaughtered for consumption***

*-> %dth\_duals% duals **died from other causes***

*-> %lost\_duals% duals were **lost in other ways**.*

**DID YOU REVIEW THE NUMBERS AND MAKE THE CORRECTIONS?**

SINGLE-SELECT

duals\_sum

E (duals\_diff>0.2 && duals\_now\_f1>0) && duals\_dif>=2

- 01  YES -> REVIEWED AND MADE CORRECTIONS
- 02  NO -> REVIEWED BUT UNABLE TO MAKE CORRECTIONS

STATIC TEXT

E (local\_diff>0.2 && local\_now\_f1>0) && local\_dif>=2

LOCALS

The number of *locals* are not adding up. To check this, please tell me if this summary is correct.

3 months ago, your household *owned %local\_3m\_f1% locals*

In the last 3 months, your household then *added %local\_in% local* to the flock:

-> *%bgt\_locals% local* were *bought*

-> *%roth\_local% local* were *received in other ways*

In the last 3 months, your household also *lost %locals\_out% local* from the flock:

-> *%sold\_local% local* were *sold live*

-> *%meat\_local% local* were *slaughtered for meat sales*

-> *%ggf\_local% local* were *given as gifts*

-> *%cons\_local% local* were *slaughtered for consumption*

-> *%dth\_local% local* *died from other causes*

-> *%lost\_local% local* were *lost in other ways*.

**DID YOU REVIEW THE NUMBERS AND MAKE THE CORRECTIONS?**

E (local\_diff>0.2 && local\_now\_f1>0) && local\_dif>=2

SINGLE-SELECT

local\_sum

01  YES -> REVIEWED AND MADE CORRECTIONS

02  NO -> REVIEWED BUT UNABLE TO MAKE CORRECTIONS

**TAKE TIME**

DATE: CURRENT TIME

chk\_mid

MM/DD/YYYY

R0. IMPACT EVALUATION / D. CHICKEN

**EGGS**

E chk\_typ\_nw.Contains(2) || // currently keep layers chk\_typ\_nw.Contains(3) || // currently keep duals chk\_typ\_nw.Contains(4) || // currently keep locals chk\_typ\_3m.Contains(2) || // 3 month ago kep [And 113 other symbols \[1\]](#)

STATIC TEXT

Now I want to ask you about the use of chicken eggs by your household in the past 30 days, so since *%rcl30d%*.

D86. In the past 30 days, so since *%rcl30d%* how many of your chickens laid eggs?

NUMERIC: INTEGER

eggs\_chk

SPECIAL VALUES

00 NONE

V1 self>=0 || self== -99

M1 Must be 0 or more; -99 if respondent doesn't know

**INTAKE**

D87. In the past 30 days, how many eggs were laid in total by your chicken?

NUMERIC: INTEGER

eggs\_laid

-----

I Record total for all chickens

E eggs\_chk>0 || !IsAnswered(eggs\_chk)

V1 \$eggrange

M1 Must be 0 or more; -99 if respondent doesn't know

VARIABLE

new[] {eggs\_laid}.Sum()

LONG

eggld

D88. In the past 30 days, how many eggs did your household buy?

NUMERIC: INTEGER

eggs\_buy

-----

V1 \$eggrange

M1 Must be 0 or more; -99 if respondent doesn't know

SPECIAL VALUES

00 NONE

D89. In total, how much did your household spend for buying these %eggs\_buy% eggs?

NUMERIC: INTEGER

eggs\_spnd

-----

I In TSh. Combined value for all purchases.

E eggs\_buy>0

V1 \$exprange

M1 Must be more than 0; -99 if respondent doesn't know

D90. In the past 30 days, how many eggs did you receive as a gift or as payment?

NUMERIC: INTEGER

eggs\_rec

-----

V1 \$eggrange

M1 Must be 0 or more; -99 if respondent doesn't know

SPECIAL VALUES

00 NONE

D91. In the past 30 days, how many eggs did you receive in any other way?

NUMERIC: INTEGER

eggs\_in

-----

V1 \$eggrange

M1 Must be 0 or more; -99 if respondent doesn't know

W2 self == 0

M2 Double check those eggs were not laid, bought, received as a gift or as payment. If so, record in respective category above.

SPECIAL VALUES

00 NONE

D92. How did you receive these %eggs\_in% eggs?

TEXT

eggs\_in\_oth

-----

E eggs\_in>0

|                                                                                                                                                                                                                                                                                                                                                                                                                                                |                                                                                                                |
|------------------------------------------------------------------------------------------------------------------------------------------------------------------------------------------------------------------------------------------------------------------------------------------------------------------------------------------------------------------------------------------------------------------------------------------------|----------------------------------------------------------------------------------------------------------------|
| <p>VARIABLE</p> <p>new[] {eggs_laid, eggs_buy, eggs_rec, eggs_in}.sum()</p>                                                                                                                                                                                                                                                                                                                                                                    | <p>LONG</p> <p>eggin</p>                                                                                       |
| <p>To confirm, your household gained a total %eggin% chicken eggs in the last 30 days.</p> <p>--&gt; %eggld% were <u>laid by your hens</u></p> <p>--&gt; %eggs_buy% were <u>bought</u></p> <p>--&gt; %eggs_rec% were <u>received as gifts</u></p> <p>--&gt; %eggs_in% were <u>received in other ways</u></p> <p>Is this correct?</p> <p>E IsAnswered(eggs_in)</p> <p>V1 self==1</p> <p>M1 Correct any errors identified by the respondent.</p> | <p>SINGLE-SELECT</p> <p>eggin_sum</p> <p>01 <input type="radio"/> YES</p> <p>02 <input type="radio"/> NO</p>   |
| <p>STATIC TEXT</p> <p><b>OFFTAKE</b></p>                                                                                                                                                                                                                                                                                                                                                                                                       |                                                                                                                |
| <p>D93. In the past 30 days, how many eggs did your household <u>sell</u>?</p> <p>V1 \$eggrange</p> <p>M1 Must be 0 or more; -99 if respondent doesn't know</p>                                                                                                                                                                                                                                                                                | <p>NUMERIC: INTEGER</p> <p>eggs_sale</p> <p>-----</p> <p>SPECIAL VALUES</p> <p>00 NONE</p>                     |
| <p>D94. Your household has not sold any chicken in the past 3 months or any eggs in the last days. However, could you tell me if you or anyone in your household sold chicken or eggs <u>in the past 12 months</u>?</p> <p>E eggs_sale==0 &amp;&amp; any_sale==2</p>                                                                                                                                                                           | <p>SINGLE-SELECT</p> <p>chkegg_sale</p> <p>01 <input type="radio"/> YES</p> <p>02 <input type="radio"/> NO</p> |
| <p>D95. How much money in total did you receive from selling these %eggs_sale% eggs in the past 30 days?</p> <p>I In TSh. Combined value for all sales.</p> <p>E eggs_sale&gt;0</p> <p>V1 \$exprange</p> <p>M1 Must be more than 0; -99 if respondent doesn't know</p> <p>V2 eggs_price&lt;=1000</p> <p>M2 Unit price cannot be more than 1000 Shillings.</p>                                                                                  | <p>NUMERIC: INTEGER</p> <p>eggs_rev</p> <p>-----</p>                                                           |
| <p>VARIABLE</p> <p>eggs_rev/eggs_sale</p>                                                                                                                                                                                                                                                                                                                                                                                                      | <p>DOUBLE</p> <p>eggs_price</p>                                                                                |

|                                                                                                                                                                                                          |                                                                                                                                                                                                                                                                                                                                                                                                                                                                                                                                   |
|----------------------------------------------------------------------------------------------------------------------------------------------------------------------------------------------------------|-----------------------------------------------------------------------------------------------------------------------------------------------------------------------------------------------------------------------------------------------------------------------------------------------------------------------------------------------------------------------------------------------------------------------------------------------------------------------------------------------------------------------------------|
| <p>D96. In the past 30 days, to whom did you sell most of these eggs?</p> <p>E eggs_sale&gt;0</p>                                                                                                        | <p>SINGLE-SELECT <span style="float: right;">egg_buyer</span></p> <p>01 <input type="radio"/> HOUSEHOLD IN THE VILLAGE</p> <p>02 <input type="radio"/> HOUSEHOLD OUTSIDE THE VILLAGE</p> <p>03 <input type="radio"/> A RESTAURANT IN THE VILLAGE</p> <p>04 <input type="radio"/> A RESTAURANT OUTSIDE THE VILLAGE</p> <p>05 <input type="radio"/> TRADER IN THE LOCAL MARKET</p> <p>06 <input type="radio"/> TRADER IN ANOTHER MARKET</p> <p>07 <input type="radio"/> A SHOP</p> <p>-96 <input type="radio"/> OTHER (SPECIFY)</p> |
| <p>D97. SPECIFY OTHER</p> <p>E egg_buyer== -96</p>                                                                                                                                                       | <p>TEXT <span style="float: right;">egg_buyer_oth</span></p> <p>.....</p>                                                                                                                                                                                                                                                                                                                                                                                                                                                         |
| <p>D98. In the past 30 days, how many eggs did your household <u>set</u> for hatching?</p> <p>V1 \$eggrange</p> <p>M1 Must be 0 or more; -99 if respondent doesn't know</p>                              | <p>NUMERIC: INTEGER <span style="float: right;">eggs_set</span></p> <p>-----</p> <p>SPECIAL VALUES</p> <p>00 NONE</p>                                                                                                                                                                                                                                                                                                                                                                                                             |
| <p>D99. In the past 30 days, how many eggs did your household <u>eat</u>?</p> <p>V1 \$eggrange</p> <p>M1 Must be 0 or more; -99 if respondent doesn't know</p>                                           | <p>NUMERIC: INTEGER <span style="float: right;">eggs_cons</span></p> <p>-----</p> <p>SPECIAL VALUES</p> <p>00 NONE</p>                                                                                                                                                                                                                                                                                                                                                                                                            |
| <p>D100. In the past 30 days, how many eggs did your household <u>use</u> for their businesses or other activities?</p> <p>V1 \$eggrange</p> <p>M1 Must be 0 or more; -99 if respondent doesn't know</p> | <p>NUMERIC: INTEGER <span style="float: right;">eggs_use</span></p> <p>-----</p> <p>SPECIAL VALUES</p> <p>00 NONE</p>                                                                                                                                                                                                                                                                                                                                                                                                             |
| <p>D101. In the past 30 days, how many eggs did your household <u>give away as gifts or payments</u>?</p> <p>V1 \$eggrange</p> <p>M1 Must be 0 or more; -99 if respondent doesn't know</p>               | <p>NUMERIC: INTEGER <span style="float: right;">eggs_ggf</span></p> <p>-----</p> <p>SPECIAL VALUES</p> <p>00 NONE</p>                                                                                                                                                                                                                                                                                                                                                                                                             |

|                                                                                                                                                                                                                                                                                                                                                                                                                                                                                                                                                                                                                                                        |                                                                                                                                                      |
|--------------------------------------------------------------------------------------------------------------------------------------------------------------------------------------------------------------------------------------------------------------------------------------------------------------------------------------------------------------------------------------------------------------------------------------------------------------------------------------------------------------------------------------------------------------------------------------------------------------------------------------------------------|------------------------------------------------------------------------------------------------------------------------------------------------------|
| <p>D102. In the past 30 days, how many eggs did your household <u>keep for future use</u>?</p> <p>V1 \$eggrange<br/>M1 Must be 0 or more; -99 if respondent doesn't know</p>                                                                                                                                                                                                                                                                                                                                                                                                                                                                           | <p>NUMERIC: INTEGER <span style="float: right;">eggs_save</span></p> <p>-----</p> <p>SPECIAL VALUES</p> <p>00        NONE</p>                        |
| <p>D103. In the past 30 days, how many of your eggs <u>got spoilt or broken</u>?</p> <p>V1 \$eggrange<br/>M1 Must be 0 or more; -99 if respondent doesn't know</p>                                                                                                                                                                                                                                                                                                                                                                                                                                                                                     | <p>NUMERIC: INTEGER <span style="float: right;">eggs_spl't</span></p> <p>-----</p> <p>SPECIAL VALUES</p> <p>00        NONE</p>                       |
| <p>D104. In the past 30 days, how many of your eggs did you <u>lose in any other way</u>?</p> <p>V1 \$eggrange<br/>M1 Must be 0 or more; -99 if respondent doesn't know<br/>W2 self == 0<br/>M2 Double check those eggs were not set for hatching, sold, eaten, kept for eating later, given as a gift or as payment, or spoilt. If so, record in respective category above.</p>                                                                                                                                                                                                                                                                       | <p>NUMERIC: INTEGER <span style="float: right;">eggs_lose</span></p> <p>-----</p> <p>SPECIAL VALUES</p> <p>00        NONE</p>                        |
| <p>D105. How did you lose these %eggs_lost% eggs?</p> <p>E eggs_lose&gt;0</p>                                                                                                                                                                                                                                                                                                                                                                                                                                                                                                                                                                          | <p>TEXT <span style="float: right;">eggs_lose_oth</span></p> <p>-----</p>                                                                            |
| <p>To confirm, your household used a total %eggin% chicken eggs in the last 30 days.</p> <p>-&gt; %eggs_sale% were <u>sold</u><br/>-&gt; %eggs_set% were <u>set for hatching</u><br/>-&gt; %eggs_cons% were <u>consumed</u><br/>-&gt; %eggs_use% were <u>kept for household businesses/activities</u><br/>-&gt; %eggs_ggf% were <u>given as gifts</u><br/>-&gt; %eggs_save% were <u>kept for future use</u><br/>-&gt; %eggs_spl't% were <u>spoilt or broken</u><br/>-&gt; %eggs_lose% were <u>lost in other ways</u></p> <p>Is this correct?</p> <p>E IsAnswered(eggs_lose)<br/>V1 self==1<br/>M1 Correct any errors identified by the respondent.</p> | <p>SINGLE-SELECT <span style="float: right;">eggout_sum</span></p> <p>01        <input type="radio"/> YES<br/>02        <input type="radio"/> NO</p> |
| <p>VARIABLE</p> <p>new[] {eggs_sale, eggs_set, eggs_cons, eggs_use, eggs_save, eggs_ggf, eggs_spl't, eggs_lose}.Sum<br/>( )</p>                                                                                                                                                                                                                                                                                                                                                                                                                                                                                                                        | <p>LONG <span style="float: right;">eggout</span></p>                                                                                                |

|                                                                                                                                                                                                        |                                            |
|--------------------------------------------------------------------------------------------------------------------------------------------------------------------------------------------------------|--------------------------------------------|
| VARIABLE<br>Math.Abs((int)eggin-(int)eggout)                                                                                                                                                           | LONG<br>eggdif                             |
| VARIABLE<br>(double)eggdif/eggin                                                                                                                                                                       | DOUBLE<br>egg_diff                         |
| D106. If your household would sell <u>one</u> egg today in the nearest market, how much would your household receive?<br><br>I In TSH<br>V1 self<=1000<br>M1 Price cannot be more than 1000 Shillings. | NUMERIC: INTEGER<br>egg_unitprice<br>----- |

STATIC TEXT

E (egg\_diff>0.3 && eggin>0) && eggdif>=10

### EGGS

The number of *eggs* are not adding up. To check this, please tell me if this summary is correct.

*In the last 30 days, your household gained %eggin% eggs:*

- > %eggld% were *laid by your hens*
- > %eggs\_buy% were *bought*
- > %eggs\_rec% were *received as gifts*
- > %eggs\_in% were *received in other ways*

*In the last 30 days, your household used %eggout% eggs in the following ways:*

- > %eggs\_sale% were *sold*
- > %eggs\_set% were *set for hatching*
- > %eggs\_cons% were *consumed*
- > %eggs\_use% were *used for household businesses or other activities*
- > %eggs\_ggf% were *given as gifts*
- > %eggs\_save% were *kept for future use (not to hatch)*
- > %eggs\_splt% were *spoilt or broken*
- > %eggs\_lose% were *lost in other ways.*

**DID YOU REVIEW THE NUMBERS AND MAKE THE CORRECTIONS?**

E (egg\_diff>0.3 && eggin>0) && eggdif>=10

|                     |                                                                     |         |
|---------------------|---------------------------------------------------------------------|---------|
| SINGLE-SELECT<br>01 | <input type="radio"/> YES -> REVIEWED AND MADE CORRECTIONS          | egg_sum |
| 02                  | <input type="radio"/> NO -> REVIEWED BUT UNABLE TO MAKE CORRECTIONS |         |

RO. IMPACT EVALUATION / D. CHICKEN  
MANURE

|                                                                                                                                           |                                                                                                                                                                                                                                                              |
|-------------------------------------------------------------------------------------------------------------------------------------------|--------------------------------------------------------------------------------------------------------------------------------------------------------------------------------------------------------------------------------------------------------------|
| <p>D107. Did you or anyone in your household use the manure produced by your chicken or chicks in the past 12 months for any purpose?</p> | <p>SINGLE-SELECT <span style="float: right;">chk_man</span></p> <p>01 <input type="radio"/> YES</p> <p>02 <input type="radio"/> NO</p>                                                                                                                       |
| <p>D108. What was it used for?</p> <p>E chk_man==1</p>                                                                                    | <p>MULTI-SELECT <span style="float: right;">chk_manuse</span></p> <p>01 <input type="checkbox"/> FERTILISE THE FARM</p> <p>02 <input type="checkbox"/> SALES</p> <p>03 <input type="checkbox"/> FUEL</p> <p>-96 <input type="checkbox"/> OTHER (SPECIFY)</p> |
| <p>D109. SPECIFY OTHER</p> <p>E chk_manuse.Contains(-96)</p>                                                                              | <p>TEXT <span style="float: right;">chk_manuse_oth</span></p> <p>.....</p>                                                                                                                                                                                   |

STATIC TEXT

*Now I want to ask you about the different practices taken up and expenses incurred by your household related to the chickens that you have kept in the past 12 months. Only consider your chicken.*

R0. IMPACT EVALUATION / D. CHICKEN  
HEALTH

|                                                                                                                                                                                                                                                                                                                                                                                |                                                                                                                                                                                      |
|--------------------------------------------------------------------------------------------------------------------------------------------------------------------------------------------------------------------------------------------------------------------------------------------------------------------------------------------------------------------------------|--------------------------------------------------------------------------------------------------------------------------------------------------------------------------------------|
| <p>D110. In the past 12 months, were any of the household's chicken or chicks vaccinated against any disease?</p>                                                                                                                                                                                                                                                              | <p>SINGLE-SELECT <span style="float: right;">vacoth_yn</span></p> <p>01 <input type="radio"/> YES</p> <p>02 <input type="radio"/> NO</p> <p>-99 <input type="radio"/> DON'T KNOW</p> |
| <p>D111. In total, how much did the household spend on the purchase and administering of vaccines given to chicken in the past 12 months?</p> <p>I In TSh. Count every vaccine rounds in the last 12 months. Include cost of transportation.</p> <p>E vacoth_yn==1</p> <p>V1 self&gt;0    self==95    self==99</p> <p>M1 Must be 0 or more; -99 if respondent doesn't know</p> | <p>NUMERIC: INTEGER <span style="float: right;">vacoth_spnd</span></p> <p>-----</p>                                                                                                  |
| <p>D112. In the past 12 months, did the household give any medicine to the chickens, apart from vaccines?</p>                                                                                                                                                                                                                                                                  | <p>SINGLE-SELECT <span style="float: right;">chkmed_yn</span></p> <p>01 <input type="radio"/> YES</p> <p>02 <input type="radio"/> NO</p> <p>-99 <input type="radio"/> DON'T KNOW</p> |

D113. What kinds of medicines did you give to your chickens in the past 12 months?

MULTI-SELECT

chkmed\_type

- 01  DE-WORMING MEDICATION
- 02  ANTIBIOTICS
- 03  TRADITIONAL MEDICINE
- 04  BLEACH
- 05  VITAMIN
- 06  PARASITES
- 96  OTHER (SPECIFY)
- 99  DON'T KNOW

I Probe and select all that apply.

E chkmed\_yn==1

V1 self.Contains(-99) ? self.Length==1 : true

M1 Cannot combined DON'T KNOW with other responses.

D114. SPECIFY OTHER

TEXT

chkmed\_type\_oth

E chkmed\_type.Contains(-96)

.....

D115. In total, how much did the household spend medicines given to chicken in the past 12 months?

NUMERIC: INTEGER

chkmed\_spnd

-----

I In TSh. Include cost of transportation. But if medicine costs already included in vaccine costs, do not count here.

E chkmed\_yn==1

V1 self>=0 || self==-95 || self==-99

M1 Must be 0 or more; -99 if respondent doesn't know

D116. In the past 12 months, did the chickens of your household receive any veterinary services other than vaccinations or medicines you bought?

SINGLE-SELECT

chkvet\_yn

- 01  YES
- 02  NO
- 99  DON'T KNOW

D117. In total, how much did the household spend on veterinary services for chickens in the past 12 months?

NUMERIC: INTEGER

chkvet\_spnd

-----

I In TSh. Include cost of transportation.

E chkvet\_yn==1

V1 self>=0 || self==-95 || self==-99

M1 Must be 0 or more; -99 if respondent doesn't know

R0. IMPACT EVALUATION / D. CHICKEN  
OTHER INPUTS

D118. Where do you normally keep majority of your chicken during the day?

SINGLE-SELECT

chk\_day

- 01  OUTSIDE - FREE
- 02  OUTSIDE - FENCED AREA
- 03  OUTSIDE - WOVEN BASKETS
- 04  OUTSIDE - NET
- 05  OUTSIDE - CHICKEN HOUSE
- 06  OUTSIDE - OTHER ROOM (NOT CHICKEN HOUSE)
- 07  INSIDE HOUSEHOLD DWELLING
- 96  OTHER (SPECIFY)

D119. SPECIFY OTHER

TEXT

chk\_day\_oth

E chk\_day== -96

.....

D120. Where do you normally keep majority of your chicken during the night?

SINGLE-SELECT

chk\_night

- 01  OUTSIDE - FREE
- 02  OUTSIDE - FENCED AREA
- 03  OUTSIDE - WOVEN BASKETS
- 04  OUTSIDE - NET
- 05  OUTSIDE - CHICKEN HOUSE
- 06  OUTSIDE - OTHER ROOM (NOT CHICKEN HOUSE)
- 07  INSIDE HOUSEHOLD DWELLING
- 96  OTHER (SPECIFY)

D121. SPECIFY OTHER

TEXT

chk\_night\_oth

E chk\_night== -96

.....

|                                                                                                                                                                                                                                                                                                |                                                                                                                                                                                                                                                                                                                                                                                                                                                             |
|------------------------------------------------------------------------------------------------------------------------------------------------------------------------------------------------------------------------------------------------------------------------------------------------|-------------------------------------------------------------------------------------------------------------------------------------------------------------------------------------------------------------------------------------------------------------------------------------------------------------------------------------------------------------------------------------------------------------------------------------------------------------|
| <p>D122. Does your household have a chicken shelter separate from the main household dwelling? A chicken shelter has walls and a roof and is used to protect chicken from theft, predators and rain. It also serves as a place for chicken to rest.</p> <p>E chk_day!=5 &amp; chk_night!=5</p> | <p>SINGLE-SELECT <span style="float: right;">coop_yn</span></p> <p>01 <input type="radio"/> YES</p> <p>02 <input type="radio"/> NO</p>                                                                                                                                                                                                                                                                                                                      |
| <p>D123. How many chicken shelters does the household have?</p> <p>E coop_yn==1    chk_day==5    chk_night==5</p> <p>V1 self&gt;0    self==-99</p> <p>M1 Must be 0 or more; -99 if respondent doesn't know</p>                                                                                 | <p>NUMERIC: INTEGER <span style="float: right;">coop_num</span></p> <p>-----</p>                                                                                                                                                                                                                                                                                                                                                                            |
| <p>D124. How many of these %coop_num% chicken shelters are elevated or raised from the ground?</p> <p>E coop_yn==1    chk_day==5    chk_night==5</p> <p>V1 self&lt;=coop_num</p> <p>M1 Cannot be more than the number of shelters reported (%coop_num%).</p>                                   | <p>NUMERIC: INTEGER <span style="float: right;">coop_elev</span></p> <p>-----</p> <p>SPECIAL VALUES</p> <p>00 NONE</p>                                                                                                                                                                                                                                                                                                                                      |
| <p>D125. In the past 12 months, how often did you or anyone in the household clean the faeces off the floor where chickens stay at night? (%chk_night%)?</p> <p>E chk_night.InList(5,6,7)    chk_day.InList(5,6,7)    coop_yn==1</p>                                                           | <p>SINGLE-SELECT <span style="float: right;">chk_clean</span></p> <p>01 <input type="radio"/> EVERY DAY</p> <p>03 <input type="radio"/> EVERY 3-4 DAYS</p> <p>04 <input type="radio"/> EVERY WEEK</p> <p>05 <input type="radio"/> EVERY 2 WEEKS</p> <p>06 <input type="radio"/> EVERY MONTH</p> <p>07 <input type="radio"/> EVERY THREE MONTHS</p> <p>08 <input type="radio"/> ONCE OR TWICE A YEAR</p> <p>-98 <input type="radio"/> NEVER (NO NEED TO)</p> |
| <p>D126. In the past 12 months, did your household spend anything on buying, constructing, maintaining or cleaning a place to keep your chickens?</p>                                                                                                                                          | <p>SINGLE-SELECT <span style="float: right;">sheltexp_yn</span></p> <p>01 <input type="radio"/> YES</p> <p>02 <input type="radio"/> NO</p>                                                                                                                                                                                                                                                                                                                  |

|                                                                                                                                                                                                                                                                                                          |                                                                                                                                                                                                                                                                                                                                                                                                                                                          |
|----------------------------------------------------------------------------------------------------------------------------------------------------------------------------------------------------------------------------------------------------------------------------------------------------------|----------------------------------------------------------------------------------------------------------------------------------------------------------------------------------------------------------------------------------------------------------------------------------------------------------------------------------------------------------------------------------------------------------------------------------------------------------|
| <p>D127. In total, how much did you spend in the past 12 months on a place to keep your chickens?</p> <p>I In TSh. Include labour expenses related to shelter. Include cost of transportation.<br/> E sheltextp_yn==1<br/> V1 \$exprange<br/> M1 Must be more than 0; -99 if respondent doesn't know</p> | <p>NUMERIC: INTEGER <span style="float: right;">sheltextp_spnd</span></p> <p>-----</p>                                                                                                                                                                                                                                                                                                                                                                   |
| <p>D128. In the past 12 months, did your household provide water for your chicken?</p>                                                                                                                                                                                                                   | <p>SINGLE-SELECT <span style="float: right;">water</span></p> <p>01 <input type="radio"/> YES<br/> 02 <input type="radio"/> NO</p>                                                                                                                                                                                                                                                                                                                       |
| <p>D129. In the past 12 months, how did your household feed majority of the chicken?</p>                                                                                                                                                                                                                 | <p>SINGLE-SELECT <span style="float: right;">feed</span></p> <p>01 <input type="radio"/> ONLY SCAVENGING<br/> 02 <input type="radio"/> MAINLY SCAVENGING, SOME FEEDING<br/> 03 <input type="radio"/> MAINLY FEEDING, SOME SCAVENGING<br/> 04 <input type="radio"/> ONLY FEEDING</p>                                                                                                                                                                      |
| <p>D130. In the past 12 months, what have you fed your chicken?</p> <p>I Probe "Any other?". Select all that apply.<br/> E feed.InList(2,3,4)</p>                                                                                                                                                        | <p>MULTI-SELECT <span style="float: right;">feed_type</span></p> <p>01 <input type="checkbox"/> KITCHEN LEFTOVERS / FOOD SCRAPS<br/> 02 <input type="checkbox"/> MAIZE GRAIN OR BRAN<br/> 03 <input type="checkbox"/> OTHER FOOD GRAINS (FOR EX: RICE)<br/> 04 <input type="checkbox"/> LEAVES<br/> 05 <input type="checkbox"/> INSECTS OR WORMS<br/> 06 <input type="checkbox"/> COMMERCIAL FEEDS<br/> -96 <input type="checkbox"/> OTHER (SPECIFY)</p> |
| <p>D131. SPECIFY OTHER</p> <p>E feed_type.Contains(-96)</p>                                                                                                                                                                                                                                              | <p>TEXT <span style="float: right;">feed_type_oth</span></p> <p>-----</p>                                                                                                                                                                                                                                                                                                                                                                                |
| <p>D132. In the past 12 months, did your household purchase any food for your chicken?</p>                                                                                                                                                                                                               | <p>SINGLE-SELECT <span style="float: right;">feed_purch</span></p> <p>01 <input type="radio"/> YES<br/> 02 <input type="radio"/> NO</p>                                                                                                                                                                                                                                                                                                                  |

|                                                                                                                                                                                                                                                                                                                                                                                                                                   |                                                                                                                                          |
|-----------------------------------------------------------------------------------------------------------------------------------------------------------------------------------------------------------------------------------------------------------------------------------------------------------------------------------------------------------------------------------------------------------------------------------|------------------------------------------------------------------------------------------------------------------------------------------|
| <p>D133. In total, how much has your household spent in the past 12 months to purchase the chicken feed?</p> <p>I In TSh. Include cost of transportation.<br/> E feed_purch==1<br/> V1 \$exprange<br/> M1 Must be more than 0; -99 if respondent doesn't know<br/> W2 self&lt;10000000<br/> M2 Amount more than 10,000,000 TSh. Please confirm</p>                                                                                | <p>NUMERIC: INTEGER <span style="float: right;">feed_spnd</span></p> <p>-----</p>                                                        |
| <p>D134. In the past 12 months, did your household pay for any transport costs for the sales of chicken, including purchase of a cage or basket to transport chicken for sales? This also includes any cost of vehicles, fuel maintenance, costs of drivers, porters, etc.</p> <p>I Do not consider any expenses for vaccines, medicines, veterinary service, chicken houses, water, or food that have been recorded earlier.</p> | <p>SINGLE-SELECT <span style="float: right;">chktrans_yn</span></p> <p>01 <input type="radio"/> YES<br/> 02 <input type="radio"/> NO</p> |
| <p>D135. In total, how much has your household spent in the past 12 months on any costs to transport chicken for sales?</p> <p>I In TSh.<br/> E chktrans_yn==1<br/> V1 self&gt;=1000    self== -99<br/> M1 Must be more than 1000; -99 if respondent doesn't know</p>                                                                                                                                                             | <p>NUMERIC: INTEGER <span style="float: right;">chktrans_spnd</span></p> <p>-----</p>                                                    |
| <p>D136. In the past 12 months, has your household incurred any other expenses related to chicken keeping?</p> <p>I Example heat, water, electricity etc. Do not consider any expenses for vaccines, medicines, veterinary service, food, water, chicken houses, or transport that have been recorded earlier.</p>                                                                                                                | <p>SINGLE-SELECT <span style="float: right;">othcexp_yn</span></p> <p>01 <input type="radio"/> YES<br/> 02 <input type="radio"/> NO</p>  |
| <p>D137. What were these expenses for?</p> <p>E othcexp_yn==1</p>                                                                                                                                                                                                                                                                                                                                                                 | <p>TEXT <span style="float: right;">othcexp_rsn</span></p> <p>-----</p>                                                                  |
| <p>D138. In total, how much were these other costs related to chicken keeping in the past 12 months?</p> <p>I In TSh.<br/> E othcexp_yn==1<br/> V1 \$exprange<br/> M1 Must be more than 0; -99 if respondent doesn't know</p>                                                                                                                                                                                                     | <p>NUMERIC: INTEGER <span style="float: right;">othcexp_spnd</span></p> <p>-----</p>                                                     |

Has your household employed anyone for your chicken business?

SINGLE-SELECT

full\_time\_wrkr

- 01  Yes, full time worker
- 02  Yes, part time worker
- 03  No, not employed anyone

I Part time worker includes hired labor paid by the task or permanent household employees who assist with chickens in addition to their other work.

E long\_short==1 || long\_short==2

R0. IMPACT EVALUATION / D. CHICKEN  
PREVENT PROGRAM

D139. In the last 3 months, has your household received any advice related to poultry from any individuals or any organisation?

SINGLE-SELECT

advice

- 01  YES
- 02  NO

D140. From whom did you receive this poultry-related advice in the past 3 months?

MULTI-SELECT

advice\_who

- 01  Extension officers
- 02  NGO programme
- 03  Agrovets shops
- 04  Other farmers
- 06  Media (radio,TV etc)

E advice==1

D141. In the last 3 months, has an employee from the chicks supply company ever visited your household and talk to you about Vaccinated Day Old Chicks?

SINGLE-SELECT

ever\_visited

- 01  YES
- 02  NO

D142. When you were visited, what information related to Vaccinated Day Old Chicks did your household receive?

MULTI-SELECT

info\_received

- 01  Chicken feeding
- 02  Vaccinations/medicines
- 03  Chicken housing
- 04  Chicken mortality
- 05  Chicken market
- 06  Biosecurity
- 07  Chicken performance
- 08  Chicken management

E ever\_visited==1

|                                                                                                                                                                                                                                                                                      |                                                                                                                                                                                                                                                                                      |
|--------------------------------------------------------------------------------------------------------------------------------------------------------------------------------------------------------------------------------------------------------------------------------------|--------------------------------------------------------------------------------------------------------------------------------------------------------------------------------------------------------------------------------------------------------------------------------------|
| <p>D143. How useful was the information you received about VDOCs to you or your household? Would you describe it as very useful, useful, neither useful nor useless, useless, or very useless?</p>                                                                                   | <p>SINGLE-SELECT info_useful</p> <p>01 <input type="radio"/> VERY USEFUL</p> <p>02 <input type="radio"/> USEFUL</p> <p>03 <input type="radio"/> NEITHER</p> <p>04 <input type="radio"/> UNUSEFUL</p> <p>05 <input type="radio"/> VERY UNUSEFUL</p>                                   |
| <p>E ever_visited==1</p>                                                                                                                                                                                                                                                             |                                                                                                                                                                                                                                                                                      |
| <p>D144. Why was the information not useful?</p>                                                                                                                                                                                                                                     | <p>SINGLE-SELECT why_not_useful</p> <p>01 <input type="radio"/> IT WAS HARD TO UNDERSTAND</p> <p>02 <input type="radio"/> IT WAS TOO MUCH INFORMATION</p> <p>03 <input type="radio"/> I KNEW ALL THE INFORMATION ALREADY</p> <p>-96 <input type="radio"/> OTHER (SPECIFY)</p>        |
| <p>E info_useful&gt;3</p>                                                                                                                                                                                                                                                            |                                                                                                                                                                                                                                                                                      |
| <p>D144b. SPECIFY OTHER</p>                                                                                                                                                                                                                                                          | <p>TEXT whynotuseful_othr</p> <p>.....</p>                                                                                                                                                                                                                                           |
| <p>E why_not_useful== -96</p>                                                                                                                                                                                                                                                        |                                                                                                                                                                                                                                                                                      |
| <p>D145. Did you or anyone from your household attend a meeting in the past 3 months where a company employee was explaining about Vaccinated Day Old Chicks (VDOCs) and their benefits?</p>                                                                                         | <p>SINGLE-SELECT attend_mtng</p> <p>01 <input type="radio"/> YES</p> <p>02 <input type="radio"/> NO</p> <p>03 <input type="radio"/> I HAVE NOT HEARD OF SUCH MEETING</p> <p>-99 <input type="radio"/> DON'T KNOW</p>                                                                 |
| <p>D146. How useful was this meeting in understanding about Vaccinated Day Old Chicks (VDOCs)? Was it very useful, useful, neither, unuseful or very unuseful?</p>                                                                                                                   | <p>SINGLE-SELECT vdoc_useful</p> <p>01 <input type="radio"/> VERY USEFUL</p> <p>02 <input type="radio"/> USEFUL</p> <p>03 <input type="radio"/> NEITHER</p> <p>04 <input type="radio"/> UNUSEFUL</p> <p>05 <input type="radio"/> VERY UNUSEFUL</p>                                   |
| <p>E attend_mtng==1</p>                                                                                                                                                                                                                                                              |                                                                                                                                                                                                                                                                                      |
| <p>D147. Overall how satisfied were you with the knowledge of the hatchery employee about VDOCs when he/she visited your household or when you attended his/her meeting? Were you very satisfied, satisfied, neither satisfied nor unsatisfied, unsatisfied or very unsatisfied?</p> | <p>SINGLE-SELECT ft_rank</p> <p>01 <input type="radio"/> very satisfied</p> <p>02 <input type="radio"/> satisfied</p> <p>03 <input type="radio"/> neither satisfied nor unsatisfied</p> <p>04 <input type="radio"/> unsatisfied</p> <p>05 <input type="radio"/> very unsatisfied</p> |
| <p>E attend_mtng==1</p>                                                                                                                                                                                                                                                              |                                                                                                                                                                                                                                                                                      |

|                                                                                                    |                                                                                                                                                                                                                                                                                                                                                                                                                                                                                                    |
|----------------------------------------------------------------------------------------------------|----------------------------------------------------------------------------------------------------------------------------------------------------------------------------------------------------------------------------------------------------------------------------------------------------------------------------------------------------------------------------------------------------------------------------------------------------------------------------------------------------|
| <p>D148. Was the hatchery employee able to answer questions that you had about VDOCs?</p>          | <p>SINGLE-SELECT <span style="float: right;">ft_qs_resp</span></p> <p>01 <input type="radio"/> YES, ALL.</p> <p>02 <input type="radio"/> YES, MOSTLY.</p> <p>03 <input type="radio"/> NO, NONE.</p> <p>-99 <input type="radio"/> Don't know</p>                                                                                                                                                                                                                                                    |
| <p>D149. To what extent do you think VDOCs have a better quality compared to other chicks.</p>     | <p>SINGLE-SELECT <span style="float: right;">vdoc_quality</span></p> <p>01 <input type="radio"/> VERY HIGH QUALITY</p> <p>02 <input type="radio"/> HIGH QUALITY</p> <p>03 <input type="radio"/> NEITHER</p> <p>04 <input type="radio"/> LOW QUALITY</p> <p>05 <input type="radio"/> VERY LOW QUALITY</p>                                                                                                                                                                                           |
| <p>D150. What are the things that make you think that VDOCs have low quality?</p>                  | <p>MULTI-SELECT <span style="float: right;">quality_why</span></p> <p>01 <input type="checkbox"/> THEY DIE EASILY</p> <p>02 <input type="checkbox"/> THEY DO NOT PRODUCE MANY EGGS</p> <p>03 <input type="checkbox"/> THEY DO NOT ATTAIN GOOD WEIGHT BEFORE THEY ARE SOLD</p> <p>04 <input type="checkbox"/> THEY ARE HARD TO SELL (CUSTOMERS DO NOT LIKE THEM )</p> <p>-96 <input type="checkbox"/> OTHER(SPECIFY)</p>                                                                            |
| <p>D151. SPECIFY OTHER</p>                                                                         | <p>TEXT <span style="float: right;">quality_other</span></p> <p>.....</p>                                                                                                                                                                                                                                                                                                                                                                                                                          |
| <p>D152. What benefits have you experienced since you and your household started to buy VDOCs?</p> | <p>MULTI-SELECT <span style="float: right;">vdoc_benefit</span></p> <p>01 <input type="checkbox"/> The management of VDOCs is less costly (e.g less vaccines)</p> <p>02 <input type="checkbox"/> VDOCs have a less mortality rate</p> <p>03 <input type="checkbox"/> VDOCs attain desirable weight before they are sold</p> <p>04 <input type="checkbox"/> I have good/reliable market for VDOCs</p> <p>-96 <input type="checkbox"/> Others (specify)</p> <p>-95 <input type="checkbox"/> None</p> |

|                                                                                               |                                                                                                                                                                                                                                                                                                                                                                                                                                                        |
|-----------------------------------------------------------------------------------------------|--------------------------------------------------------------------------------------------------------------------------------------------------------------------------------------------------------------------------------------------------------------------------------------------------------------------------------------------------------------------------------------------------------------------------------------------------------|
| D153. SPECIFY OTHER.                                                                          | TEXT <span style="float: right;">vdoc_benefit_other</span>                                                                                                                                                                                                                                                                                                                                                                                             |
| E vdoc_benefit.ContainsAny(-96)                                                               | .....                                                                                                                                                                                                                                                                                                                                                                                                                                                  |
| D154. What challenges have you experienced since you and your household started to buy VDOCs? | MULTI-SELECT <span style="float: right;">challenges</span>                                                                                                                                                                                                                                                                                                                                                                                             |
| E vdoc_buy==1                                                                                 | 01 <input type="checkbox"/> The management of VDOCs is costly<br>02 <input type="checkbox"/> VDOCs have a high mortality rate<br>03 <input type="checkbox"/> I am not well-informed about VDOCs management<br>04 <input type="checkbox"/> VDOCs do not attain desirable weight before they are sold<br>05 <input type="checkbox"/> VDOCs are not easily available<br>-95 <input type="checkbox"/> None<br>-96 <input type="checkbox"/> Other (specify) |
| D155. SPECIFY OTHER.                                                                          | TEXT <span style="float: right;">challenge_other</span>                                                                                                                                                                                                                                                                                                                                                                                                |
| E challenges.ContainsAny(-96)                                                                 | .....                                                                                                                                                                                                                                                                                                                                                                                                                                                  |
| Are you currently operating as a Brooder or Mother Unit?                                      | SINGLE-SELECT <span style="float: right;">op_br_mu</span>                                                                                                                                                                                                                                                                                                                                                                                              |
|                                                                                               | 01 <input type="radio"/> Yes<br>02 <input type="radio"/> No                                                                                                                                                                                                                                                                                                                                                                                            |
| When did you start operating as a Brooder/Mother Unit?                                        | SINGLE-SELECT <span style="float: right;">when_br_mu</span>                                                                                                                                                                                                                                                                                                                                                                                            |
| E op_br_mu==1                                                                                 | 01 <input type="radio"/> Less than 1 year ago<br>02 <input type="radio"/> 1-2 years ago<br>03 <input type="radio"/> 3-4 years ago<br>04 <input type="radio"/> More than 4 years ago                                                                                                                                                                                                                                                                    |
| How many Small-Scale Producers (SSPs) do you typically supply with brooded chicks per cycle?  | SINGLE-SELECT <span style="float: right;">qty_br_mu</span>                                                                                                                                                                                                                                                                                                                                                                                             |
| E op_br_mu==1                                                                                 | 01 <input type="radio"/> 1-20 SSPs<br>02 <input type="radio"/> 21-40 SSPs<br>03 <input type="radio"/> 41-60 SSPs<br>04 <input type="radio"/> 61-80 SSPs<br>05 <input type="radio"/> 81-100 SSPs<br>06 <input type="radio"/> More than 100 SSPs                                                                                                                                                                                                         |

|           |                                                                             |
|-----------|-----------------------------------------------------------------------------|
| TAKE TIME | DATE: CURRENT TIME <span style="float: right;">chk_end</span><br>MM/DD/YYYY |
|-----------|-----------------------------------------------------------------------------|

R0. IMPACT EVALUATION  
E. OTHER WORK

|           |                                                                                |
|-----------|--------------------------------------------------------------------------------|
| TAKE TIME | DATE: CURRENT TIME <span style="float: right;">owrk_start</span><br>MM/DD/YYYY |
|-----------|--------------------------------------------------------------------------------|

STATIC TEXT

*Now I would like to find out about other income-generating activities taken up by members of this household. If you do not know some of the information we are asking for, please do ask with other household members. If a relevant household member is not available, we can provide a phone for you to call them.*

R0. IMPACT EVALUATION / E. OTHER WORK  
LABOUR

|                                                                                                                                                                                                                                                                                                                   |                                                                                                                        |
|-------------------------------------------------------------------------------------------------------------------------------------------------------------------------------------------------------------------------------------------------------------------------------------------------------------------|------------------------------------------------------------------------------------------------------------------------|
| <p>E1. In the past 12 months, that is from %rcl12mt% last year, have you or any household member undertaken any work for someone outside of your household, even if only for 1 hour, for which they were paid with a salary, cash or in kind. This could be for a company, the government, or another person.</p> | SINGLE-SELECT <span style="float: right;">job_yn</span><br>01 <input type="radio"/> YES<br>02 <input type="radio"/> NO |
|-------------------------------------------------------------------------------------------------------------------------------------------------------------------------------------------------------------------------------------------------------------------------------------------------------------------|------------------------------------------------------------------------------------------------------------------------|

E2. Which paid jobs has members of this household done during the past 12 months? Start with the one that earned most income to the one that earned least income.

I List all jobs using a general name, e.g. harvest work. Probe 'any other paid work'? List up to 3.  
 E job\_yn==1

MULTI-SELECT: ORDERED

job\_list

- 01  LABOUR ON FARMS, FOR LIVESTOCK REARING, OR FOR FISHING
- 02  WORKER AT STORE OR MARKET (INCLUDING AGRICULTURAL AND LIVESTOCK INPUTS)
- 03  FACTORY OR WORKSHOP WORKER
- 04  FOOD OR BEVERAGE PROCESSOR (E.G. BREWER)
- 05  WORKER IN CONSTRUCTION BUSINESS
- 06  WORKER IN TRANSPORTATION BUSINESS
- 07  WORKER AT RESTAURANT OR HOTEL
- 08  TEACHER AT SCHOOL
- 09  GOVERNMENT WORKER
- 10  NON-GOVERNMENTAL ORGANISATION WORKER
- 11  PRIVATE ORGANISATION WORKER
- 12  WORKER FOR RELIGIOUS ORGANIZATION
- 13  WORKER FOR OTHER SERVICES (INCLUDING PERSONAL AND MEDICAL SERVICES)
- 96  OTHER (SPECIFY)

R0. IMPACT EVALUATION / E. OTHER WORK / LABOUR

Roster: JOBS

generated by multi-select question [job\\_list](#)

jobs

SPECIFY OTHER

TEXT

job\_oth

E @rowcode== -96

.....

E3. During how many months over the past 12 months did members of this household do this job (%rosteritle%)?

NUMERIC: INTEGER

job\_months

-----

I Number of months, does not have to be completed months. If less than 1 month, then select 1.

V1 self<=12

M1 One can not work more than 12 months within one year. Please check.

V2 self>0

M2 Has to have worked at least during 1 month

E4. Approximately how many days per month did members of this household do this job (%rosteritle%)?

NUMERIC: DECIMAL

job\_daypm

-----

I This refers to calendar days, if the person worked for less than four hours then the day should be counted as a half day. Calculate average if number of days worked is different in different months.

V1 self>0

M1 Must be larger than 0.

V2 self<=31

M2 One month has at most 31 days.

R0. IMPACT EVALUATION / E. OTHER WORK  
**SELF-EMPLOYMENT**

E5. In the past 12 months, since %rcl12mt% last year, have you or anyone in the household carried out a family business or worked on your own account, for example a family shop, preparing and selling food, pikipiki, etc?

SINGLE-SELECT

semp\_yn

01  YES

02  NO

I Do NOT include anything that has been recorded previously, i.e sale of live chicken or other livestock, sale of eggs and other livestock products, and salaried jobs.

W1 any\_slaughter==1 ? businesses.Any(x=>x.semp\_chkrel==1) : true

M1 Household slaughtered chicken to sell their meat or organs. We consider this a business or self-employed activity. Please record here.

E6. Which businesses and own account work have the members of this household done during the past 12 month? Start with the one you earned most from.

I Probe 'any other paid work'? List up to 3 businesses. Do NOT include anything that has been recorded previously, i.e sale of live chicken or other livestock, sale of eggs and other livestock products, [And 19 other symbols \[3\]](#)

E semp\_yn == 1

MULTI-SELECT: ORDERED

semp\_list

- 01  GROCERY / CORNER SHOP
- 02  PETTY TRADER
- 03  FOOD PROCESSOR (BAKER, LOCAL BEVERAGES, STREET FOOD, ETC.)
- 04  BUTCHERY
- 05  HARDWARE STORE
- 06  AGRICULTURAL INPUTS STORE
- 07  MILL (E.G., MAIZE MILL)
- 08  CHARCOAL / FIREWOOD
- 09  MECHANIC / TIRE REPAIR
- 10  CARPENTER
- 11  TRADITIONAL HEALER
- 12  TAXI / MOTO TAXI
- 13  HOTEL / GUEST HOUSE/HOUSE FOR RENT
- 14  BAR / RESTAURANT / TAKE-AWAY
- 15  ELECTRONICS / PHONE REPAIR
- 16  TAILOR/ CLOTHES REPAIR

[And 8 other symbols \[6\]](#)

R0. IMPACT EVALUATION / E. OTHER WORK / SELF-EMPLOYMENT

**Roster: BUSINESSES**

generated by multi-select question [semp\\_list](#)

businesses

SPECIFY OTHER

TEXT

semp\_oth

E @rowcode===-96

.....

STATIC TEXT

*Now I want to ask about the business or own account work **%rostartitle%***

|                                                                                                                                                                                                                                                                                                                                                                                                                               |                                                                                                                                                                          |
|-------------------------------------------------------------------------------------------------------------------------------------------------------------------------------------------------------------------------------------------------------------------------------------------------------------------------------------------------------------------------------------------------------------------------------|--------------------------------------------------------------------------------------------------------------------------------------------------------------------------|
| <p>E7. Is the business or own account work directly related to chicken, for example, processing, cooking or selling chicken meat or organs?</p>                                                                                                                                                                                                                                                                               | <p>SINGLE-SELECT <span style="float: right;">semp_chkrel</span></p> <p>01 <input type="radio"/> YES</p> <p>02 <input type="radio"/> NO</p>                               |
| <p>E8. During how many months over the past 12 months was the business or own account work operating or active (<b>%rostertitle%</b>)?</p> <p>I Number of months, does not have to be completed months. If less than 1 month, then select 1.</p> <p>V1 self&lt;=12</p> <p>M1 One can not work more than 12 months within one year. Please check.</p> <p>V2 self&gt;0</p> <p>M2 Has to have worked at least during 1 month</p> | <p>NUMERIC: INTEGER <span style="float: right;">semp_months</span></p> <p>-----</p>                                                                                      |
| <p>E9. How much did the household earn from <b>%rostertitle%</b> after paying for expenses (profit), in a normal month or in total in the past 12 months?</p> <p>I In TSh. Estimate in-kind payments.</p>                                                                                                                                                                                                                     | <p>NUMERIC: INTEGER <span style="float: right;">semp_amount</span></p> <p>-----</p>                                                                                      |
| <p>E10. UNIT</p>                                                                                                                                                                                                                                                                                                                                                                                                              | <p>SINGLE-SELECT <span style="float: right;">semp_unit</span></p> <p>01 <input type="radio"/> IN NORMAL MONTH</p> <p>02 <input type="radio"/> IN PAST 12 MONTHS</p>      |
| <p>E11. CONFIRM THE UNIT</p> <p>E IsAnswered(semp_unit)</p> <p>V1 self==semp_unit</p> <p>M1 Please double-check the unit used for household business profit.</p>                                                                                                                                                                                                                                                              | <p>SINGLE-SELECT <span style="float: right;">semp_unit_conf</span></p> <p>01 <input type="radio"/> IN NORMAL MONTH</p> <p>02 <input type="radio"/> IN PAST 12 MONTHS</p> |

R0. IMPACT EVALUATION / E. OTHER WORK  
**CASH TRANSFERS**

|                                                                                                                                                    |                                                                                                                                           |
|----------------------------------------------------------------------------------------------------------------------------------------------------|-------------------------------------------------------------------------------------------------------------------------------------------|
| <p>E12. In the past 12 months, did you or anyone in the household receive any cash help from the government, NGOs, or religious organizations?</p> | <p>SINGLE-SELECT <span style="float: right;">trans_form</span></p> <p>01 <input type="radio"/> YES</p> <p>02 <input type="radio"/> NO</p> |
|----------------------------------------------------------------------------------------------------------------------------------------------------|-------------------------------------------------------------------------------------------------------------------------------------------|

|                                                                                                                                                   |                                                                                        |
|---------------------------------------------------------------------------------------------------------------------------------------------------|----------------------------------------------------------------------------------------|
| <p>E13. What was the total value of the cash help that your household received from these organisations in the last 12 months?</p>                | <p>NUMERIC: INTEGER <span style="float: right;">trans_form_sum</span></p> <p>-----</p> |
| <p>I In TSh<br/> E trans_form==1<br/> V1 self&gt;0<br/> M1 Must be more than 0.<br/> W2 self&lt;1000000<br/> M2 Amount is big. Please confirm</p> |                                                                                        |

|                                                                                                                                                                                     |                                                                      |
|-------------------------------------------------------------------------------------------------------------------------------------------------------------------------------------|----------------------------------------------------------------------|
| <p>E14. In the past 12 months, did you or anyone in the household receive any cash help from family, relatives, friends, or anyone else that is not a member of this household?</p> | <p>SINGLE-SELECT <span style="float: right;">trans_inf</span></p>    |
|                                                                                                                                                                                     | <p>01 <input type="radio"/> YES<br/> 02 <input type="radio"/> NO</p> |

|                                                                                                                                                                              |                                                                                       |
|------------------------------------------------------------------------------------------------------------------------------------------------------------------------------|---------------------------------------------------------------------------------------|
| <p>E15. What was the total value of the cash help that your household received from these family, relatives or friends from outside the household in the last 12 months?</p> | <p>NUMERIC: INTEGER <span style="float: right;">trans_inf_sum</span></p> <p>-----</p> |
| <p>I In TSh<br/> E trans_inf==1<br/> V1 self&gt;0<br/> M1 Must be more than 0.<br/> V2 self&lt;3000000<br/> M2 Amount huge. Please confirm</p>                               |                                                                                       |

|                  |                                                                                                      |
|------------------|------------------------------------------------------------------------------------------------------|
| <p>TAKE TIME</p> | <p>DATE: CURRENT TIME <span style="float: right;">owrk_end</span></p> <p>MM/DD/YYYY</p> <p>.....</p> |
|------------------|------------------------------------------------------------------------------------------------------|

R0. IMPACT EVALUATION  
**F. FOOD**

|                                                                                                                                                                              |                                                                           |
|------------------------------------------------------------------------------------------------------------------------------------------------------------------------------|---------------------------------------------------------------------------|
| <p>F1. Now I want to ask some questions about the food eaten in this household. Can I please speak to the person who is normally preparing the meals for this household.</p> | <p>SINGLE-SELECT: LINKED <span style="float: right;">food_resp</span></p> |
| <p>SELECT THE RESPONDENT FOR THIS SECTION.</p>                                                                                                                               | <p>SOURCE OF CATEGORIES: ROSTER <a href="#">HHROSTER</a></p>              |
| <p>F age&gt;=15</p>                                                                                                                                                          |                                                                           |

|                                                                                 |                                           |            |
|---------------------------------------------------------------------------------|-------------------------------------------|------------|
| TAKE TIME                                                                       | DATE: CURRENT TIME<br>MM/DD/YYYY<br>..... | food_start |
| VARIABLE<br>food_start.Value.Date.AddDays(-7).ToString<br>("dddd (dd/MM/yyyy)") | STRING                                    | rc17fdy    |

R0. IMPACT EVALUATION / F. FOOD  
DIVERSITY

STATIC TEXT

*I would like to ask you about the types of foods (meals and snacks) that you or other members of the household ate or drank in the past 7 days, that is from the morning of last %rc17fdy% until yesterday at night.*

*Here we are interested:*

- 1) Food consumed inside the household whether or not prepared at home and
- 2) Food consumed outside the household but that was prepared at home.

|                                                                                                                                                                                                                               |                                                        |           |
|-------------------------------------------------------------------------------------------------------------------------------------------------------------------------------------------------------------------------------|--------------------------------------------------------|-----------|
| F2. On how many days in the past 7 days did you or anyone in your household consume any <u>rice, maize, ugali, bread, mandazi, chapati, macaroni or any other food made from wheat flour, millet, sorghum or other grain?</u> | NUMERIC: INTEGER<br>-----<br>SPECIAL VALUES<br>00 NONE | fd_grains |
| V1 self.InRange(0,7)<br>M1 Cannot be more than 7 days                                                                                                                                                                         |                                                        |           |
| F3. On how many days in the past 7 days did you or anyone in your household consume any <u>pumpkin, carrots, squash, or sweet potatoes that are yellow or orange inside?</u>                                                  | NUMERIC: INTEGER<br>-----<br>SPECIAL VALUES<br>00 NONE | fd_vaveg  |
| V1 self.InRange(0,7)<br>M1 Cannot be more than 7 days                                                                                                                                                                         |                                                        |           |
| F4. On how many days did you or anyone in the household consume any <u>fresh cassava, cassava dry or flour, irish potatoes, white yams, cocoyams, manioc??</u>                                                                | NUMERIC: INTEGER<br>-----<br>SPECIAL VALUES<br>00 NONE | fd_tubers |
| V1 self.InRange(0,7)<br>M1 Cannot be more than 7 days                                                                                                                                                                         |                                                        |           |

|                                                                                                                                                                                                                                                                             |                                                                                                                         |
|-----------------------------------------------------------------------------------------------------------------------------------------------------------------------------------------------------------------------------------------------------------------------------|-------------------------------------------------------------------------------------------------------------------------|
| <p>F5. On how many days did you or anyone in the household consume any <u>spinach, cassava leaves, pumpkin or sweet potato leaves, or any dark green leafy vegetable?</u></p> <p>V1 self.InRange(0,7)<br/>M1 Cannot be more than 7 days</p>                                 | <p>NUMERIC: INTEGER <span style="float: right;">fd_leaves</span></p> <p>-----</p> <p>SPECIAL VALUES</p> <p>00 NONE</p>  |
| <p>F6. On how many days did you or anyone in the household consume any <u>onions, tomatoes, green pepers, cooking banana or other vegetable?</u></p> <p>V1 self.InRange(0,7)<br/>M1 Cannot be more than 7 days</p>                                                          | <p>NUMERIC: INTEGER <span style="float: right;">fd_veg</span></p> <p>-----</p> <p>SPECIAL VALUES</p> <p>00 NONE</p>     |
| <p>F7. On how many days did you or anyone in the household consume any <u>ripe mangoes or ripe papaya?</u></p> <p>V1 self.InRange(0,7)<br/>M1 Cannot be more than 7 days</p>                                                                                                | <p>NUMERIC: INTEGER <span style="float: right;">fd_vafruit</span></p> <p>-----</p> <p>SPECIAL VALUES</p> <p>00 NONE</p> |
| <p>F8. Still thinking of the past 7 days, on how many days did you or anyone in the household consume <u>oranges, pineapples, avocados, coconuts, passion fruit, or ripe bananas, or any other fruit?</u></p> <p>V1 self.InRange(0,7)<br/>M1 Cannot be more than 7 days</p> | <p>NUMERIC: INTEGER <span style="float: right;">fd_fruit</span></p> <p>-----</p> <p>SPECIAL VALUES</p> <p>00 NONE</p>   |
| <p>F9. On how many days did you or anyone in the household consume any <u>chicken meat or organs?</u></p> <p>V1 self.InRange(0,7)<br/>M1 Cannot be more than 7 days</p>                                                                                                     | <p>NUMERIC: INTEGER <span style="float: right;">fd_chicken</span></p> <p>-----</p> <p>SPECIAL VALUES</p> <p>00 NONE</p> |
| <p>F10. On how many days did you or anyone in the household consume any <u>other meat such as beef, pork, goat or their organs?</u></p> <p>V1 self.InRange(0,7)<br/>M1 Cannot be more than 7 days</p>                                                                       | <p>NUMERIC: INTEGER <span style="float: right;">fd_meat</span></p> <p>-----</p> <p>SPECIAL VALUES</p> <p>00 NONE</p>    |
| <p>F11. On how many days did you or anyone in the household consume any <u>chicken eggs?</u></p> <p>V1 self.InRange(0,7)<br/>M1 Cannot be more than 7 days</p>                                                                                                              | <p>NUMERIC: INTEGER <span style="float: right;">fd_ceggs</span></p> <p>-----</p> <p>SPECIAL VALUES</p> <p>00 NONE</p>   |

|                                                                                                                                                                                                                                                                                      |                                                                                                                         |
|--------------------------------------------------------------------------------------------------------------------------------------------------------------------------------------------------------------------------------------------------------------------------------------|-------------------------------------------------------------------------------------------------------------------------|
| <p>F12. On how many days did <u>pregnant or lactating women</u> in the household consume any chicken <u>eggs</u>?</p> <p>E wom_rep==1 &amp;&amp; fd_ceggs&gt;0<br/> V1 self.InRange(0,fd_ceggs)<br/> M1 Cannot be more than number of days that any member ate eggs (%fd_ceggs%)</p> | <p>NUMERIC: INTEGER <span style="float: right;">fd_ceggs_wom</span></p> <p>-----</p> <p>SPECIAL VALUES<br/> 00 NONE</p> |
| <p>F13. On how many days did <u>children under 5 years</u> in the household consume any chicken <u>eggs</u>?</p> <p>E num_child&gt;0 &amp;&amp; fd_ceggs&gt;0<br/> V1 self.InRange(0,fd_ceggs)<br/> M1 Cannot be more than number of days that any member ate eggs (%fd_ceggs%)</p>  | <p>NUMERIC: INTEGER <span style="float: right;">fd_ceggs_chd</span></p> <p>-----</p> <p>SPECIAL VALUES<br/> 00 NONE</p> |
| <p>F14. Still thinking of the past 7 days, on how many days did you or anyone in the household consume any <u>eggs</u> from other birds like ducks, guinea fowls, or quails?</p> <p>V1 self.InRange(0,7)<br/> M1 Cannot be more than 7 days</p>                                      | <p>NUMERIC: INTEGER <span style="float: right;">fd_oeggs</span></p> <p>-----</p> <p>SPECIAL VALUES<br/> 00 NONE</p>     |
| <p>F15. On how many days did you or any one in the household consume any <u>fresh, dried or canned fish, dagaa, shellfish, or seafood</u>?</p> <p>V1 self.InRange(0,7)<br/> M1 Cannot be more than 7 days</p>                                                                        | <p>NUMERIC: INTEGER <span style="float: right;">fd_fish</span></p> <p>-----</p> <p>SPECIAL VALUES<br/> 00 NONE</p>      |
| <p>F16. On how many days did you or any one in the household consume any <u>beans, lentils, peas, groundnuts, cashews or other pulses or nuts</u>??</p> <p>V1 self.InRange(0,7)<br/> M1 Cannot be more than 7 days</p>                                                               | <p>NUMERIC: INTEGER <span style="float: right;">fd_pulses</span></p> <p>-----</p> <p>SPECIAL VALUES<br/> 00 NONE</p>    |
| <p>F17. On how many days did you or any one in the household consume any <u>milk tinned, powdered, fresh animal milk, cheese, or yogurt</u>?</p> <p>V1 self.InRange(0,7)<br/> M1 Cannot be more than 7 days</p>                                                                      | <p>NUMERIC: INTEGER <span style="float: right;">fd_diary</span></p> <p>-----</p> <p>SPECIAL VALUES<br/> 00 NONE</p>     |

|                                                                                                                                                                                                               |                                                                                                                      |
|---------------------------------------------------------------------------------------------------------------------------------------------------------------------------------------------------------------|----------------------------------------------------------------------------------------------------------------------|
| <p>F18. On how many days did you or any one in the household consume any <u>cooking oil, fats, butter, or foods made with any of these?</u></p> <p>V1 self.InRange(0,7)<br/>M1 Cannot be more than 7 days</p> | <p>NUMERIC: INTEGER <span style="float: right;">fd_oils</span></p> <p>-----</p> <p>SPECIAL VALUES</p> <p>00 NONE</p> |
|---------------------------------------------------------------------------------------------------------------------------------------------------------------------------------------------------------------|----------------------------------------------------------------------------------------------------------------------|

|                                                                                                                                                                                                                                              |                                                                                                                       |
|----------------------------------------------------------------------------------------------------------------------------------------------------------------------------------------------------------------------------------------------|-----------------------------------------------------------------------------------------------------------------------|
| <p>F19. On how many days did you or any one in the household consume any <u>sugar or sugary foods including, chocolate, sweets, candies, pastries, cakes, or biscuits?</u></p> <p>V1 self.InRange(0,7)<br/>M1 Cannot be more than 7 days</p> | <p>NUMERIC: INTEGER <span style="float: right;">fd_sugar</span></p> <p>-----</p> <p>SPECIAL VALUES</p> <p>00 NONE</p> |
|----------------------------------------------------------------------------------------------------------------------------------------------------------------------------------------------------------------------------------------------|-----------------------------------------------------------------------------------------------------------------------|

|                                                                                                                                                                                                                           |                                                                                                                        |
|---------------------------------------------------------------------------------------------------------------------------------------------------------------------------------------------------------------------------|------------------------------------------------------------------------------------------------------------------------|
| <p>F20. On how many days did you or any one in the household consume any <u>condiments for flavor, such as chillies, spices, herbs, or fish powder?</u></p> <p>V1 self.InRange(0,7)<br/>M1 Cannot be more than 7 days</p> | <p>NUMERIC: INTEGER <span style="float: right;">fd_spices</span></p> <p>-----</p> <p>SPECIAL VALUES</p> <p>00 NONE</p> |
|---------------------------------------------------------------------------------------------------------------------------------------------------------------------------------------------------------------------------|------------------------------------------------------------------------------------------------------------------------|

|                                                                                                                                                                                                                    |                                                                                                                         |
|--------------------------------------------------------------------------------------------------------------------------------------------------------------------------------------------------------------------|-------------------------------------------------------------------------------------------------------------------------|
| <p>F21. On how many days did you or any one in the household eat any food <u>outside the household</u>, whether or not it was prepared at home?</p> <p>V1 self.InRange(0,7)<br/>M1 Cannot be more than 7 days.</p> | <p>NUMERIC: INTEGER <span style="float: right;">fd_outside</span></p> <p>-----</p> <p>SPECIAL VALUES</p> <p>00 NONE</p> |
|--------------------------------------------------------------------------------------------------------------------------------------------------------------------------------------------------------------------|-------------------------------------------------------------------------------------------------------------------------|

|                                                                                                                                                                                                                                                                                                                                                                              |                                                                                                                       |
|------------------------------------------------------------------------------------------------------------------------------------------------------------------------------------------------------------------------------------------------------------------------------------------------------------------------------------------------------------------------------|-----------------------------------------------------------------------------------------------------------------------|
| <p>F22. In the past 7 days, on average, how many meals <u>per day</u> were taken by you and others in your household? By meal, I mean specific times in the day at which your household members eat food.</p> <p>I Assist respondent in calculating average number of meals per day.</p> <p>V1 self&lt;=4<br/>M1 Unlikely to be more than 4 meals per day. Please check.</p> | <p>NUMERIC: INTEGER <span style="float: right;">fd_meals</span></p> <p>-----</p> <p>SPECIAL VALUES</p> <p>00 NONE</p> |
|------------------------------------------------------------------------------------------------------------------------------------------------------------------------------------------------------------------------------------------------------------------------------------------------------------------------------------------------------------------------------|-----------------------------------------------------------------------------------------------------------------------|

|                  |                                                                                                      |
|------------------|------------------------------------------------------------------------------------------------------|
| <p>TAKE TIME</p> | <p>DATE: CURRENT TIME <span style="float: right;">food_end</span></p> <p>MM/DD/YYYY</p> <p>.....</p> |
|------------------|------------------------------------------------------------------------------------------------------|

---

STATIC TEXT

*Now I would like to ask you some questions about your household financial situation.*

---

TAKE TIME

DATE: CURRENT TIME

vIn\_start

MM/DD/YYYY

---

R0. IMPACT EVALUATION / G. SHOCKS  
SHOCKS

---

G1. Now I will ask you about some events or situations that might have affected your household. During the last 12 months, has your household been affected by ...

I Read out each option.

V1 self.Missing.Length==0

M1 Please complete the list in order to proceed to the next section. All items in the list have not been marked either 'yes' or 'no'.

MULTI-SELECT: YES/NO

shk\_typ

- |    |                                                     |                                                                                         |
|----|-----------------------------------------------------|-----------------------------------------------------------------------------------------|
| 01 | <input type="checkbox"/> / <input type="checkbox"/> | previous harvest not sufficiently meeting food needs until next harvest                 |
| 02 | <input type="checkbox"/> / <input type="checkbox"/> | unusually severe drought                                                                |
| 03 | <input type="checkbox"/> / <input type="checkbox"/> | unusually irregular rains                                                               |
| 04 | <input type="checkbox"/> / <input type="checkbox"/> | unusually large loss of crop due to pests or disease                                    |
| 05 | <input type="checkbox"/> / <input type="checkbox"/> | unusually large loss of livestock due to disease or theft                               |
| 06 | <input type="checkbox"/> / <input type="checkbox"/> | death of income earner or other household members                                       |
| 07 | <input type="checkbox"/> / <input type="checkbox"/> | serious illness or accident of income earner or household member(s)                     |
| 08 | <input type="checkbox"/> / <input type="checkbox"/> | low or no earnings from household businesses (not due to illness or accident)           |
| 09 | <input type="checkbox"/> / <input type="checkbox"/> | low or no earnings from household member(s) waged work (not due to illness or accident) |
| 10 | <input type="checkbox"/> / <input type="checkbox"/> | end of regular assistance/aid/remittances from outside the household                    |
| 11 | <input type="checkbox"/> / <input type="checkbox"/> | theft of money/valuables/assets/agricultural output                                     |
| 12 | <input type="checkbox"/> / <input type="checkbox"/> | birth in the household                                                                  |
| 13 | <input type="checkbox"/> / <input type="checkbox"/> | break-up of household                                                                   |
| 14 | <input type="checkbox"/> / <input type="checkbox"/> | conflict/violence                                                                       |
| 15 | <input type="checkbox"/> / <input type="checkbox"/> | fire                                                                                    |
| 16 | <input type="checkbox"/> / <input type="checkbox"/> | floods                                                                                  |

[And 1 other symbols \[7\]](#)

G2. SPECIFY OTHER SHOCK

TEXT

shk\_typ\_oth

E shk\_typ.Yes.Contains(-96)

.....

G3. Of the events and situations you just mentioned, which ones affected your household most in the past 12 months?

I Record up to 3 in order of importance, starting from the worst shock. Read out the selected shocks to help the respondent with ordering.

F shk\_typ.Yes.Contains(@optioncode)

E shk\_typ.Yes.Length>0

MULTI-SELECT: ORDERED

shk\_top3

- 01  previous harvest not sufficiently meeting food needs until next harvest
- 02  unusually severe drought
- 03  unusually irregular rains
- 04  unusually large loss of crop due to pests or disease
- 05  unusually large loss of livestock due to disease or theft
- 06  death of income earner or other household members
- 07  serious illness or accident of income earner or household member(s)
- 08  low or no earnings from household businesses (not due to illness or accident)
- 09  low or no earnings from household member(s) waged work (not due to illness or accident)
- 10  end of regular assistance/aid/remittances from outside the household
- 11  theft of money/valuables/assets/agricultural output
- 12  birth in the household
- 13  break-up of household
- 14  conflict/violence
- 15  fire
- 16  floods

R0. IMPACT EVALUATION / G. SHOCKS / SHOCKS

## Roster: SHOCKS

generated by multi-select question [shk\\_top3](#)

shocks

|                                                                                                                                                                                                                       |                                                                                                                                                                                                                                                                            |
|-----------------------------------------------------------------------------------------------------------------------------------------------------------------------------------------------------------------------|----------------------------------------------------------------------------------------------------------------------------------------------------------------------------------------------------------------------------------------------------------------------------|
| <p>G4. Now think of the worst instance of <b>%rosteritle%</b> in the last 12 months. As a result of this, did your <u>household's income</u> decrease a lot, decrease only a little, or not change at all?</p>        | <p>SINGLE-SELECT <span style="float: right;">shk_inc</span></p> <p>01      <input type="radio"/> DECREASE A LOT</p> <p>02      <input type="radio"/> DECREASE A LITTLE</p> <p>03      <input type="radio"/> NO CHANGE</p> <p>04      <input type="radio"/> INCREASED</p>   |
| <p>G5. As a result of this, did your <u>household's possessions or belongings</u> decrease a lot, decrease only a little, or not change at all?</p>                                                                   | <p>SINGLE-SELECT <span style="float: right;">shk_ast</span></p> <p>01      <input type="radio"/> DECREASE A LOT</p> <p>02      <input type="radio"/> DECREASE A LITTLE</p> <p>03      <input type="radio"/> NO CHANGE</p> <p>04      <input type="radio"/> INCREASED</p>   |
| <p>G6. As a result of this, did your <u>household's food production</u> decrease a lot, decrease only a little, or not change at all?</p>                                                                             | <p>SINGLE-SELECT <span style="float: right;">shk_fprod</span></p> <p>01      <input type="radio"/> DECREASE A LOT</p> <p>02      <input type="radio"/> DECREASE A LITTLE</p> <p>03      <input type="radio"/> NO CHANGE</p> <p>04      <input type="radio"/> INCREASED</p> |
| <p>G7. Still think of the worst instance of <b>%rosteritle%</b> in the last 12 months. As a result of this, did your <u>household's food stocks</u> decrease a lot, decrease only a little, or not change at all?</p> | <p>SINGLE-SELECT <span style="float: right;">shk_fstk</span></p> <p>01      <input type="radio"/> DECREASE A LOT</p> <p>02      <input type="radio"/> DECREASE A LITTLE</p> <p>03      <input type="radio"/> NO CHANGE</p> <p>04      <input type="radio"/> INCREASED</p>  |
| <p>G8. As a result of this, did your <u>household's food purchases</u> decrease a lot, decrease only a little, or not change at all?</p>                                                                              | <p>SINGLE-SELECT <span style="float: right;">shk_fpch</span></p> <p>01      <input type="radio"/> DECREASE A LOT</p> <p>02      <input type="radio"/> DECREASE A LITTLE</p> <p>03      <input type="radio"/> NO CHANGE</p> <p>04      <input type="radio"/> INCREASED</p>  |

G9. What did your household do to overcome the difficulties caused by %rosteritle% in the past 12 months? Please start with the response that helped the most to overcome the difficulties that were caused to your household.

I Probe and record up to 5 in order of importance.

V1 self.contains(22) ? self.Length==1 : true

M1 Cannot combine DID NOT DO ANYTHING with other options

MULTI-SELECT: ORDERED

shk\_rspn

- 01  SOLD CHICKEN OR ITS EGGS
- 02  SOLD OTHER POULTRY OR ITS PRODUCTS
- 03  SOLD SMALL RUMINANTS (SHEEP, GOAT) OR ITS PRODUCTS
- 04  SOLD LARGE RUMINANTS (COW, BULL, ETC.) OR ITS PRODUCTS
- 05  SOLD OTHER HOUSEHOLD ASSETS OR LAND
- 06  SOLD CROP
- 07  USED HOUSEHOLD SAVINGS
- 08  RECEIVED CONTRIBUTIONS FROM FAMILY, FRIENDS
- 09  TOOK SUPPORT FROM GOVERNMENT, NGOs, OR OTHER ORGANIZATION
- 10  BORROWED FROM FAMILY, RELATIVES, OR FRIENDS
- 11  BORROWED FROM A BANK, EMPLOYER, PRIVATE LENDER
- 12  CONSUMED CHICKEN OR ITS EGGS
- 13  CONSUMED OTHER POULTRY OR ITS PRODUCTS
- 14  CONSUMED SMALL RUMINANTS (SHEEP, GOAT) OR ITS PRODUCTS
- 15  CONSUMED LARGE RUMINANTS (COW, BULL, ETC.) OR ITS PRODUCTS
- 16  HOUSEHOLD MEMBERS TOOK ON MORE EMPLOYMENT

[And 7 other symbols \[9\]](#)

G10. SPECIFY OTHER

TEXT

shk\_rspn\_oth

E shk\_rspn.Contains(-96)

.....

VARIABLE

STRING

fdeff\_eng

(shk\_fprod.InList(1,2) && shk\_fstk.InList(3,4) && shk\_fpch.InList(3,4))? "food production": (shk\_fprod.InList(3,4) && shk\_fstk.InList(1,2) && shk\_fpch.InList(3,4))? "food stocks": (shk\_fprod.InList(3

[And 423 other symbols \[1\]](#)

VARIABLE

STRING

fdeff

(shk\_fprod.InList(1,2) && shk\_fstk.InList(3,4) && shk\_fpch.InList(3,4))? "uzalishaji wa chakula": (shk\_fprod.InList(3,4) && shk\_fstk.InList(1,2) && shk\_fpch.InList(3,4))? "aki ba ya chakula": (shk\_fpr

[And 475 other symbols \[2\]](#)

G11. You mentioned that as a result of **%rostartitle%**, your household's %fdef f% had decreased. Did your household consume chicken or chicken eggs, that would have otherwise not been consumed, to overcome these difficulties in the last 12 months?

SINGLE-SELECT

shk\_chkcons

- 01  YES  
02  NO

E !shk\_rspn.Contains(12) && (shk\_fprod.InList(1,2) || shk\_fstk.InList(1,2) || shk\_fpch.InList(1,2))

G12. Did your household sell chicken or chicken eggs, that would have otherwise not been sold, to overcome the difficulties caused by **%rostartitle%** in the last 12 months?

SINGLE-SELECT

shk\_chksale

- 01  YES  
02  NO

E !shk\_rspn.Contains(1)

TAKE TIME

DATE: CURRENT TIME

v1n\_end

MM/DD/YYYY

.....

R0. IMPACT EVALUATION

H. WELFARE

TAKE TIME

DATE: CURRENT TIME

welf\_start

MM/DD/YYYY

.....

*Now I want to ask you some questions about your dwelling and some items your household might have.*

|                                                                                                                                                                                                                                     |                                                                                                                                                                                                                                                                                                                                                                                                                                                                                                                                                               |
|-------------------------------------------------------------------------------------------------------------------------------------------------------------------------------------------------------------------------------------|---------------------------------------------------------------------------------------------------------------------------------------------------------------------------------------------------------------------------------------------------------------------------------------------------------------------------------------------------------------------------------------------------------------------------------------------------------------------------------------------------------------------------------------------------------------|
| <p><b>H1. WHAT IS THE MAIN BUILDING MATERIAL USED FOR THE FLOOR OF THE MAIN BUILDING?</b></p> <p>I Ask respondent if floor not visible.<br/> W1 self!=2<br/> M1 Double-check this answer. Dung is not commonly used for floors.</p> | <p>SINGLE-SELECT <span style="float: right;">ppi_floor</span></p> <p>01 <input type="radio"/> EARTH/SAND</p> <p>02 <input type="radio"/> DUNG</p> <p>03 <input type="radio"/> VINYL OR ASPHALT STRIPS</p> <p>04 <input type="radio"/> WOOD PLANKS</p> <p>05 <input type="radio"/> PALM/BAMBOO</p> <p>06 <input type="radio"/> CEMENT</p> <p>07 <input type="radio"/> CERAMIC TILES</p> <p>08 <input type="radio"/> PARQUET OR POLISHED WOOD</p> <p>-96 <input type="radio"/> OTHER (SPECIFY)</p>                                                              |
| <p><b>H2. SPECIFY OTHER</b></p> <p>E ppi_floor== -96</p>                                                                                                                                                                            | <p>TEXT <span style="float: right;">ppi_floor_oth</span></p> <p>.....</p>                                                                                                                                                                                                                                                                                                                                                                                                                                                                                     |
| <p><b>H3. What is the main fuel used for cooking?</b></p>                                                                                                                                                                           | <p>SINGLE-SELECT <span style="float: right;">ppi_fuel</span></p> <p>01 <input type="radio"/> FIREWOOD</p> <p>02 <input type="radio"/> COAL</p> <p>03 <input type="radio"/> SOLAR</p> <p>04 <input type="radio"/> BIOGAS</p> <p>05 <input type="radio"/> WOOD/FARM RESIDUALS, OR ANIMAL RESIDUALS</p> <p>06 <input type="radio"/> CHARCOAL</p> <p>07 <input type="radio"/> PARAFFIN</p> <p>08 <input type="radio"/> INDUSTRIAL GAS</p> <p>09 <input type="radio"/> ELECTRICITY (GENERATOR/PRIVATE SOURCE)</p> <p>-96 <input type="radio"/> OTHER (SPECIFY)</p> |
| <p><b>H4. SPECIFY OTHER</b></p> <p>E ppi_fuel== -96</p>                                                                                                                                                                             | <p>TEXT <span style="float: right;">ppi_fuel_oth</span></p> <p>.....</p>                                                                                                                                                                                                                                                                                                                                                                                                                                                                                      |

H5. What is the main source of energy for lightning?

SINGLE-SELECT

ppi\_light

- 01  Electricity
- 02  Acetylene lamp
- 03  Kerosene
- 04  Candles
- 05  Firewood
- 06  Parafin
- 07  Torch
- 08  Solar
- 09  Generator
- 10  Natural gas
- 96  Other (specify)

H6. SPECIFY OTHER

TEXT

ppi\_light\_oth

E ppi\_light== -96

.....

STATIC TEXT

*Now I want to ask for some items if you or anyone in your household owns such an item. Only consider functioning items that are not broken.*

H7. Does the household own any charcoal stoves?

SINGLE-SELECT

stove

- 01  YES
- 02  NO

H8. Does your household own a table?

SINGLE-SELECT

table

- 01  YES
- 02  NO

H9. Does your household own a TV?

SINGLE-SELECT

television

- 01  Yes
- 02  No

H10. Does your household own a mobile phone?

SINGLE-SELECT

phone

- 01  YES
- 02  NO

H11. Does your household own any cattle, goats, sheep, or hogs?

SINGLE-SELECT

livstck

- 01  Yes
- 02  No

TAKE TIME

DATE: CURRENT TIME

welf\_end

MM/DD/YYYY

.....

# Q. RESULT

|                            |                                                                                                                                                                                                                                                                                                                                                                                                                                                                                                                                                                                                                                                                                                 |
|----------------------------|-------------------------------------------------------------------------------------------------------------------------------------------------------------------------------------------------------------------------------------------------------------------------------------------------------------------------------------------------------------------------------------------------------------------------------------------------------------------------------------------------------------------------------------------------------------------------------------------------------------------------------------------------------------------------------------------------|
| <p>RECORD FINAL RESULT</p> | <p>SINGLE-SELECT <span style="float: right;">result</span></p> <p>01 <input type="radio"/> DONE</p> <p>02 <input type="radio"/> PARTIALLY DONE (REFUSED)</p> <p>03 <input type="radio"/> PARTIALLY DONE (UNAVAILABLE)</p> <p>05 <input type="radio"/> REFUSED</p> <p>07 <input type="radio"/> LONG TERM UNAVAILABLE (MOVED AWAY - WITHIN DISTRICT)</p> <p>08 <input type="radio"/> LONG TERM UNAVAILABLE (MOVED AWAY - OUTSIDE DISTRICT)</p> <p>09 <input type="radio"/> LONG TERM UNAVAILABLE (CARETAKER(S) NOT AVAILABLE)</p> <p>10 <input type="radio"/> UNABLE TO TRACK HH</p> <p>11 <input type="radio"/> HH NO LONGER KEEP CHICKEN</p> <p>12 <input type="radio"/> HH NO LONGER EXIST</p> |
|----------------------------|-------------------------------------------------------------------------------------------------------------------------------------------------------------------------------------------------------------------------------------------------------------------------------------------------------------------------------------------------------------------------------------------------------------------------------------------------------------------------------------------------------------------------------------------------------------------------------------------------------------------------------------------------------------------------------------------------|

## Q. RESULT CONTACT

E result.InList(1,2)

|                                                                                                                                                                             |                                                                                                                                       |
|-----------------------------------------------------------------------------------------------------------------------------------------------------------------------------|---------------------------------------------------------------------------------------------------------------------------------------|
| <p>Could you please give me a phone number where you can be reached.</p> <p>I Enter 0999 999 999 if respondent does not know or does not want to share the phone number</p> | <p>TEXT <span style="float: right;">ph1</span></p> <p>.....</p>                                                                       |
| <p>Does this number belong to a household member?</p> <p>E ph1!="0999 999 999"</p>                                                                                          | <p>SINGLE-SELECT <span style="float: right;">ph1_hh</span></p> <p>01 <input type="radio"/> YES</p> <p>02 <input type="radio"/> NO</p> |
| <p>Whose number is this?</p> <p>E ph1!="0999 999 999" &amp; ph1_hh==1</p>                                                                                                   | <p>SINGLE-SELECT: LINKED <span style="float: right;">ph1_ownhh</span></p> <p>SOURCE OF CATEGORIES: ROSTER <a href="#">MEMBERS</a></p> |

|                                                                                                                                                                                  |                                                                                                                                                                                                                                                                                                                                                                                  |
|----------------------------------------------------------------------------------------------------------------------------------------------------------------------------------|----------------------------------------------------------------------------------------------------------------------------------------------------------------------------------------------------------------------------------------------------------------------------------------------------------------------------------------------------------------------------------|
| <p>Whose number is this?</p> <p>E ph1!="0999 999 999" &amp; ph1_hh==2</p>                                                                                                        | <p>TEXT <span style="float: right;">ph1_own</span></p> <p>.....</p>                                                                                                                                                                                                                                                                                                              |
| <p>What is the relationship of the %ph1_ow<br/>n% to %head%?</p> <p>E ph1_hh==2</p>                                                                                              | <p>SINGLE-SELECT <span style="float: right;">ph1_re1</span></p> <p>01      <input type="radio"/> RELATIVE</p> <p>02      <input type="radio"/> FRIEND</p> <p>03      <input type="radio"/> NEIGHBOUR</p> <p>04      <input type="radio"/> SUB-VILLAGE LEADER</p> <p>05      <input type="radio"/> VILLAGE LEADER</p> <p>06      <input type="radio"/> OTHER COMMUNITY MEMBER</p> |
| <p>Could you please give me another phone number where you can be reached</p> <p>I Enter 0999 999 999 if respondent does not know or does not want to share the phone number</p> | <p>TEXT <span style="float: right;">ph2</span></p> <p>.....</p>                                                                                                                                                                                                                                                                                                                  |
| <p>Does this number belong to a household member?</p> <p>E ph2!="0999 999 999"</p>                                                                                               | <p>SINGLE-SELECT <span style="float: right;">ph2_hh</span></p> <p>01      <input type="radio"/> YES</p> <p>02      <input type="radio"/> NO</p>                                                                                                                                                                                                                                  |
| <p>Whose number is this?</p> <p>E ph2!="0999 999 999" &amp; ph2_hh==1</p>                                                                                                        | <p>SINGLE-SELECT: LINKED <span style="float: right;">ph2_ownhh</span><br/>SOURCE OF CATEGORIES: ROSTER <a href="#">MEMBERS</a></p>                                                                                                                                                                                                                                               |
| <p>Whose number is this?</p> <p>E ph2!="0999 999 999" &amp; ph2_hh==2</p>                                                                                                        | <p>TEXT <span style="float: right;">ph2_own</span></p> <p>.....</p>                                                                                                                                                                                                                                                                                                              |
| <p>What is the relationship of the %ph2_ow<br/>n% to %head%?</p> <p>E ph2_hh==2</p>                                                                                              | <p>SINGLE-SELECT <span style="float: right;">ph2_re1</span></p> <p>01      <input type="radio"/> RELATIVE</p> <p>02      <input type="radio"/> FRIEND</p> <p>03      <input type="radio"/> NEIGHBOUR</p> <p>04      <input type="radio"/> SUB-VILLAGE LEADER</p> <p>05      <input type="radio"/> VILLAGE LEADER</p> <p>06      <input type="radio"/> OTHER COMMUNITY MEMBER</p> |

|                                                                                                                                                                                                                    |                                                                                                                                                                                                                                                                                                                                                      |
|--------------------------------------------------------------------------------------------------------------------------------------------------------------------------------------------------------------------|------------------------------------------------------------------------------------------------------------------------------------------------------------------------------------------------------------------------------------------------------------------------------------------------------------------------------------------------------|
| <p>Could you please give me yet another phone number where you can be reached?</p> <p>I Enter 0999 999 999 if respondent does not know or does not want to share the phone number</p> <p>E ph2!="0999 999 999"</p> | <p>TEXT <span style="float: right;">ph3</span></p> <p>.....</p>                                                                                                                                                                                                                                                                                      |
| <p>Does this number belong to a household member?</p> <p>E IsAnswered(ph3) &amp;&amp; ph3!="0999 999 999"</p>                                                                                                      | <p>SINGLE-SELECT <span style="float: right;">ph3_hh</span></p> <p>01 <input type="radio"/> YES</p> <p>02 <input type="radio"/> NO</p>                                                                                                                                                                                                                |
| <p>Whose number is this?</p> <p>E ph3!="0999 999 999" &amp; ph3_hh==1</p>                                                                                                                                          | <p>SINGLE-SELECT: LINKED <span style="float: right;">ph3_ownhh</span></p> <p>SOURCE OF CATEGORIES: ROSTER <a href="#">MEMBERS</a></p>                                                                                                                                                                                                                |
| <p>Whose number is this?</p> <p>E ph3!="0999 999 999" &amp; ph3_hh==2</p>                                                                                                                                          | <p>TEXT <span style="float: right;">ph3_own</span></p> <p>.....</p>                                                                                                                                                                                                                                                                                  |
| <p>What is the relationship of the %ph3_own% to %head%?</p> <p>E ph3_hh==2</p>                                                                                                                                     | <p>SINGLE-SELECT <span style="float: right;">ph3_re1</span></p> <p>01 <input type="radio"/> RELATIVE</p> <p>02 <input type="radio"/> FRIEND</p> <p>03 <input type="radio"/> NEIGHBOUR</p> <p>04 <input type="radio"/> VILLAGE LEADER</p> <p>05 <input type="radio"/> OTHER VILLAGE OFFICIAL</p> <p>06 <input type="radio"/> OTHER VILLAGE MEMBER</p> |

STATIC TEXT

E anychicken==1

*We have now completed the interview. Thank you very much for taking the time to talk to us.*

|                                                                                                                                          |                                                                           |
|------------------------------------------------------------------------------------------------------------------------------------------|---------------------------------------------------------------------------|
| <p>PROVIDE DETAILS ADDITIONAL DETAILS ON WHY THE INTERVIEW WAS NOT DONE</p> <p>E result.InList(2,3,4,5,6,7) &amp;&amp; anychicken==1</p> | <p>TEXT <span style="float: right;">details</span></p> <p>.....</p>       |
| <p>In which ward did the HH moved to?</p> <p>E result==7</p>                                                                             | <p>TEXT <span style="float: right;">ward_moved</span></p> <p>.....</p>    |
| <p>In which village did the HH moved to?</p> <p>E result==7</p>                                                                          | <p>TEXT <span style="float: right;">village_moved</span></p> <p>.....</p> |

|                                                                  |                                                                                                                                                                                                                                                                                                         |
|------------------------------------------------------------------|---------------------------------------------------------------------------------------------------------------------------------------------------------------------------------------------------------------------------------------------------------------------------------------------------------|
| PROVIDE A PHONE NUMBER OF AN INFORMANT WHO CAN VERIFY THE RESULT | TEXT <span style="float: right;">vrfnum</span>                                                                                                                                                                                                                                                          |
| E result.InList(2,3,4,5,6,7) && anychicken==1                    | .....                                                                                                                                                                                                                                                                                                   |
| NAME OF THE INFORMANT                                            | TEXT <span style="float: right;">vrfnme</span>                                                                                                                                                                                                                                                          |
| E result.InList(2,3,4,5,6,7) && anychicken==1                    | .....                                                                                                                                                                                                                                                                                                   |
| RELATIONSHIP TO HEAD / POSITION IN VILLAGE                       | SINGLE-SELECT <span style="float: right;">vrfnre</span>                                                                                                                                                                                                                                                 |
| E result.InList(2,3,4,5,6,7) && anychicken==1                    | 01 <input type="radio"/> HOUSEHOLD HEAD<br>02 <input type="radio"/> RELATIVE<br>03 <input type="radio"/> FRIEND<br>04 <input type="radio"/> NEIGHBOUR<br>05 <input type="radio"/> SUB-VILLAGE LEADER<br>R<br>06 <input type="radio"/> VILLAGE LEADER<br>07 <input type="radio"/> OTHER COMMUNITY MEMBER |
| ENTER ANY COMMENTS                                               | TEXT <span style="float: right;">comment</span>                                                                                                                                                                                                                                                         |
|                                                                  | .....                                                                                                                                                                                                                                                                                                   |

# APPENDIX A — ENABLING CONDITIONS

## [1] : EGGS

Enablement Condition:

```
chk_typ_nw.Contains(2) || // currently keep layers
chk_typ_nw.Contains(3) || // currently keep duals
chk_typ_nw.Contains(4) || // currently keep locals
chk_typ_3m.Contains(2) || // 3 month ago kept layers
chk_typ_3m.Contains(3) || // 3 month ago kept duals
chk_typ_3m.Contains(4) // 3 month ago kept locals
```

## [2] : M. GROUP MEMBERSHIP AND PHYSICAL MOBILITY

Enablement Condition:

```
consent==1 && (
(
(long_short==1 || long_short==4) &&
(
(qnr_parent==1 && enum_sex==chk_ct_gender && chk_ct_avail==1)
||
(qnr_parent==2 && enum_sex==chk_ct_gender && chk_ct_avail==1)
)
)
|| long_short==2 || long_short==3
)
```

## [3] : ACCESS TO FINANCIAL SERVICES

Enablement Condition:

```
consent==1 && (
(
(long_short==1 || long_short==4) &&
(
(qnr_parent==1 && enum_sex==chk_ct_gender && chk_ct_avail==1)
||
(qnr_parent==2 && enum_sex==chk_ct_gender && chk_ct_avail==1)
)
)
|| long_short==2 || long_short==3
)
```

## APPENDIX B — VALIDATION CONDITIONS AND MESSAGES

[1] `e1_age`: C7. What is `<font color="purple">%hroster%</font>`'s age?

Validation Condition:

```
self>=0 && self<100 || self==99
```

Validation Message: Age not in range

Validation Condition:

```
@rowcode==e1_headcd && age!=-99 ? age>15 : true
```

Validation Message: Age too young to be head.

Validation Condition:

```
rel==12 && age!=-99 ? age > 30 : true
```

Validation Message: Age too young to be parent in law

Validation Condition:

```
rel.InList(6) && age!=-99 ? age < 50 : true
```

Validation Message: Age too old to be a grandson or daughter

Validation Condition:

```
rel == 3 && age!=-99 ? ! hroster.Any(x=>x.ishead==1 && x.age<=age+12) : true
```

Validation Message: Age too old to be child of the head.

Validation Condition:

```
rel == 6 && age!=-99 ? ! hroster.Any(x=>x.ishead==1 && x.age<=age+24) : true
```

Validation Message: Age too old to be grand child of the head.

Validation Condition:

```
rel == 7 && age!=-99 ? ! hroster.Any(x=>x.ishead==1 && x.age>=age-12) : true
```

Validation Message: Age too young to be parent of the head.

Validation Condition:

```
rel.InList(2) && age!=-99 ? age > 15 : true
```

Validation Message: Age too young to be spouse.

Validation Condition:

```
rel == 4 && age!=-99 ? ! hroster.Any(x=>x.ishead==1 && x.age<=age+5) : true
```

Validation Message: Age too old to be step child.

Validation Condition:

```
e1_rsnjon == 1 ? age <= 2 // if newborn, age should be <=2  
: e1_rsnjon.InList(3,4,6,8,9) ? age >= 15 // unlikely if younger  
: e1_rsnjon == 5 ? age >=8 // only possible if at school at BL  
: e1_rsnjon.InList(7,10) ? age >= 2 // must have been alive at BL  
: true
```

Validation Message: Age and reason for joining household are unlikely to match.

## APPENDIX C — INSTRUCTIONS

- [1] **hh\_num: C1. How many members are a part of your household? By household members I mean all people who normally live and eat together, and who share resources among each other. Please include individuals who were recently born or joined the household in any other reason, and individuals who are currently not present but spent more than half of their time in the past 3 months living with members of this household.**  
HOUSEHOLD DEFINITION: A household is a group of people, or person, who share food and other resources under a common budget and live in the same compound/homestead. <br> POLYGAMOUS HOUSEHOLDS: If this is a polygamous household where more than one spouse lives in the same compound, list ONLY members who share resources with the selected spouse. Include the household head. DO NOT include other spouses and their families. <br> HOUSEHOLD MEMBERS include anyone who meets the criteria for being part of the household more than half of the time during the past 3 months, as well as anyone who recently entered the household through birth or marriage to a household member. Always include boarding school students who usually live in this household. People who left the household within the last 3 months are not considered household members if they are not expected to return. A tenant who does not take their meals where they live is considered as a separate household.
- [2] **el\_stlhed: Is <font color="purple">%pl\_headname%</font> still the head of this household?**  
HOUSEHOLD HEAD: the individual who plays a leading role in household decision-making, particularly concerning household economic activity and expenditures. Generally, the person identified by the household as the household head is accepted in this role for the survey.
- [3] **semp\_list: E6. Which businesses and own account work have the members of this household done during the past 12 month? Start with the one you earned most from.**  
Probe 'any other paid work'? List up to 3 businesses. Do NOT include anything that has been recorded previously, i.e sale of live chicken or other livestock, sale of eggs and other livestock products, and salaried jobs.
- [4] **g6\_01: M5. During the past 12 months, how often do you generally go to <font color="purple">%rostertitle%</font>?**  
Guide respondent to think of all the times respondent needed to visit %rostertitle% in the last 12 times. Then find out how many times they actually visited %rostertitle% in order to answer the question.
- [5] **g6\_01\_s: M5. During the past 12 months, how often do you generally go to <font color="purple">%rostertitle%</font>?**  
Guide respondent to think of all the times respondent needed to visit %rostertitle% in the last 12 times. Then find out how many times they actually visited %rostertitle% in order to answer the question.

## *APPENDIX D — CATEGORIES*

[1] agunits

yesno

Categories: 1:YES, 2:NO

[2] months

Categories: 25:JAN 23, 26:FEB 23, 27:MAR 23, 28:APR 23, 29:MAY 23, 30:JUN 23, 31:JUL 23, 32:AUG 23, 33:SEP 23, 34:OCT 23, 35:NOV 23, 36:DEC 23, 37:JAN 24, 38:FEB 24, 39:MAR 24, 40:APR 24, 41:MAY 24, 42:JUN 24, 43:JUL 24, 44:AUG 24, 45:SEP 24, 46:OCT 24, 47:NOV 24, 48:DEC 24, 49:JAN 25, 50:FEB 25, 51:MAR 25, 52:APR 25, 53:MAY 25, 54:JUN 25, 55:JUL 25

[3]

ward\_id: WARD

[4] vlg\_id: VILLAGE/ MTAA

semp\_list: E6. Which businesses and own account work have the members of this household done during the past 12 month? Start with the one you earned most from.

Categories: 1:GROCERY / CORNER SHOP, 2:PETTY TRADER, 3:FOOD PROCESSOR (BAKER, LOCAL BEVERAGES, STREET FOOD, ETC.), 4:BUTCHERY, 5:HARDWARE STORE, 6:AGRICULTURAL INPUTS STORE, 7:MILL (E.G., MAIZE MILL),

[5]

[6]

8:CHARCOAL / FIREWOOD, 9:MECHANIC / TIRE REPAIR, 10:CARPENTER, 11:TRADITIONAL HEALER, 12:TAXI / MOTO TAXI, 13:HOTEL / GUEST HOUSE/HOUSE FOR RENT, 14:BAR / RESTAURANT / TAKE-AWAY, 15:ELECTRONICS / PHONE REPAIR, 16:TAILOR/ CLOTHES REPAIR, 17:HAIRDRESSER / BEAUTICIAN/ BARBER, 18:CRAFTS (BASKET/ REEDMAT MAKING, BROOM MAKING ETC.), 19:CONSTRUCTION MATERIAL DEALER, 20:CLOTHING / SHOE STORE, 21:FINANCIAL SERVICES (M-PESA), 22:TRANSPORT SERVICES/CAR RENTAL, 23:AGRICULTURE OR LIVESTOCK, -96:OTHER (SPECIFY)

- [7] [shk\\_typ: G1. Now I will ask you about some events or situations that might have affected your household. During the last 12 months, has your household been affected by ...](#)

Categories: 1:previous harvest not sufficiently meeting food needs until next harvest, 2:unusually severe drought, 3:unusually irregular rains, 4:unusually large loss of crop due to pests or disease, 5:unusually large loss of livestock due to disease or theft, 6:death of income earner or other household members, 7:serious illness or accident of income earner or household member(s), 8:low or no earnings from household businesses (not due to illness or accident), 9:low or no earnings from household member(s) waged work (not due to illness or accident), 10:end of regular assistance/aid/remittances from outside the household, 11:theft of money/valuables/assets/agricultural output, 12:birth in the household, 13:break-up of household, 14:conflict/violence, 15:fire, 16:floods, -96:any other event that affected your household (specify)

- [8] [shk\\_top3: G3. Of the events and situations you just mentioned, which ones affected your household most in the past 12 months?](#)

Categories: 1:previous harvest not sufficiently meeting food needs until next harvest, 2:unusually severe drought, 3:unusually irregular rains, 4:unusually large loss of crop due to pests or disease, 5:unusually large loss of livestock due to disease or theft, 6:death of income earner or other household members, 7:serious illness or accident of income earner or household member(s), 8:low or no earnings from household businesses (not due to illness or accident), 9:low or no earnings from household member(s) waged work (not due to illness or accident), 10:end of regular assistance/aid/remittances from outside the household, 11:theft of money/valuables/assets/agricultural output, 12:birth in the household, 13:break-up of household, 14:conflict/violence, 15:fire, 16:floods, -96:any other event that affected your household (specify)

- [9] [shk\\_rspn: G9. What did your household do to overcome the difficulties caused by <font color="purple">%rostartitle%</font> in the past 12 months? Please start with the response that helped the most to overcome the difficulties that were caused to your household.](#)

Categories: 1:SOLD CHICKEN OR ITS EGGS, 2:SOLD OTHER POULTRY OR ITS PRODUCTS, 3:SOLD SMALL RUMINANTS (SHEEP, GOAT) OR ITS PRODUCTS, 4:SOLD LARGE RUMINANTS (COW, BULL, ETC.) OR ITS PRODUCTS, 5:SOLD OTHER HOUSEHOLD ASSETS OR LAND, 6:SOLD CROP, 7:USED HOUSEHOLD SAVINGS, 8:RECEIVED CONTRIBUTIONS FROM FAMILY, FRIENDS, 9:TOOK SUPPORT FROM GOVERNMENT, NGOs, OR OTHER ORGANISATION, 10:BORROWED FROM FAMILY, RELATIVES, OR FRIENDS, 11:BORROWED FROM A BANK, EMPLOYER, PRIVATE LENDER, 12:CONSUMED CHICKEN OR ITS EGGS, 13:CONSUMED OTHER POULTRY OR ITS PRODUCTS, 14:CONSUMED SMALL RUMINANTS (SHEEP, GOAT) OR ITS PRODUCTS, 15:CONSUMED LARGE RUMINANTS (COW, BULL, ETC.) OR ITS PRODUCTS, 16:HOUSEHOLD MEMBERS TOOK ON MORE EMPLOYMENT, 17:HOUSEHOLD MEMBERS MIGRATED, 18:REDUCED RENT OR STOPPED PAYING RENT, 19:REDUCED FOOD CONSUMPTION, 20:REDUCED OTHER EXPENSES, E.G. MEDICAL, SCHOOL, ETC, 21:PRAYER, 22:DID NOT DO ANYTHING, -96:OTHER (SPECIFY)

- [10] [wake: O1. Yesterday, what time did you wake up?](#)

Categories: 1:00:00, 2:00:15, 3:00:30, 4:00:45, 5:01:00, 6:01:15, 7:01:30, 8:01:45, 9:02:00, 10:02:15, 11:02:30, 12:02:45, 13:03:00, 14:03:15, 15:03:30, 16:03:45, 17:04:00, 18:04:15, 19:04:30, 20:04:45, 21:05:00, 22:05:15, 23:05:30, 24:05:45, 25:06:00, 26:06:15, 27:06:30, 28:06:45, 29:07:00, 30:07:15, 31:07:30, 32:07:45, 33:08:00, 34:08:15, 35:08:30, 36:08:45, 37:09:00, 38:09:15, 39:09:30, 40:09:45, 41:10:00, 42:10:15, 43:10:30, 44:10:45, 45:11:00, 46:11:15, 47:11:30, 48:11:45, 49:12:00, 50:12:15, 51:12:30, 52:12:45, 53:13:00, 54:13:15, 55:13:30, 56:13:45, 57:14:00, 58:14:15, 59:14:30, 60:14:45, 61:15:00, 62:15:15, 63:15:30, 64:15:45, 65:16:00, 66:16:15, 67:16:30, 68:16:45, 69:17:00, 70:17:15, 71:17:30, 72:17:45, 73:18:00, 74:18:15, 75:18:30, 76:18:45, 77:19:00, 78:19:15, 79:19:30, 80:19:45, 81:20:00, 82:20:15, 83:20:30, 84:20:45, 85:21:00, 86:21:15, 87:21:30, 88:21:45, 89:22:00, 90:22:15, 91:22:30, 92:22:45, 93:23:00, 94:23:15, 95:23:30, 96:23:45

- [11] [sleep: O2. Yesterday, what time did you go to sleep?](#)

Categories: 1:00:00, 2:00:15, 3:00:30, 4:00:45, 5:01:00, 6:01:15, 7:01:30, 8:01:45, 9:02:00, 10:02:15, 11:02:30, 12:02:45, 13:03:00, 14:03:15, 15:03:30, 16:03:45, 17:04:00, 18:04:15, 19:04:30, 20:04:45, 21:05:00, 22:05:15, 23:05:30, 24:05:45, 25:06:00, 26:06:15, 27:06:30, 28:06:45, 29:07:00, 30:07:15, 31:07:30, 32:07:45, 33:08:00, 34:08:15, 35:08:30, 36:08:45, 37:09:00, 38:09:15, 39:09:30, 40:09:45, 41:10:00, 42:10:15, 43:10:30, 44:10:45, 45:11:00, 46:11:15, 47:11:30, 48:11:45, 49:12:00, 50:12:15, 51:12:30, 52:12:45, 53:13:00, 54:13:15, 55:13:30, 56:13:45, 57:14:00, 58:14:15, 59:14:30, 60:14:45, 61:15:00, 62:15:15, 63:15:30, 64:15:45, 65:16:00, 66:16:15, 67:16:30, 68:16:45, 69:17:00, 70:17:15, 71:17:30, 72:17:45, 73:18:00, 74:18:15, 75:18:30, 76:18:45, 77:19:00, 78:19:15, 79:19:30, 80:19:45, 81:20:00, 82:20:15, 83:20:30, 84:20:45, 85:21:00, 86:21:15, 87:21:30, 88:21:45, 89:22:00, 90:22:15, 91:22:30, 92:22:45, 93:23:00, 94:23:15, 95:23:30, 96:23:45

- [12] [activity\\_1: From <font color="maroon">%wake%</font>, what did you do?](#)

Categories: 1:Selling products and/or services in a shop, for self or household member, 2:Selling products and/or services door-to-door, for self or household member, 3:Sourcing and transporting products for trade e.g. day-old chicks, semen straws, feed, drugs etc, 4:Value -addition to the traded product e.g. processing meat, caring for the incubation process, grading etc, 5:Cleaning equipment and premises, 6:Communicating with suppliers, 7:Business group meetings (SACCO or ROSCA meetings, etc), 8:Business or self-employment activities (other than the agri-enterprise) for self or household member, 9:Work as employed, 10:Going to the bank, 11:Bookkeeping, 18:Sleeping and resting, 13:Eating and drinking, 14:Personal care, 15:School (incl. homework), 16:Cooking, 17:Domestic work (incl. fetching water, fuel),

12:Caring for children, 19:Caring for adults (sick, elderly), 20:Commuting (to/from work or school), 21:Traveling (not for work or school), 22:Exercising, 23:Social activities and hobbies, 24:Religious activities, 25:Weaving / sewing / textile care, 26:Farming, crop cultivation,, 27:Livestock raising (cattle, poultry, sheep, etc.), 28:Shopping / getting service (incl. health services), 29:Horticulture

[13] **endtime\_1: Until what time?** <font color="maroon">(%hrs\_1% hours %min\_1% minutes)</font>

Categories: 1:00:00, 2:00:15, 3:00:30, 4:00:45, 5:01:00, 6:01:15, 7:01:30, 8:01:45, 9:02:00, 10:02:15, 11:02:30, 12:02:45, 13:03:00, 14:03:15, 15:03:30, 16:03:45, 17:04:00, 18:04:15, 19:04:30, 20:04:45, 21:05:00, 22:05:15, 23:05:30, 24:05:45, 25:06:00, 26:06:15, 27:06:30, 28:06:45, 29:07:00, 30:07:15, 31:07:30, 32:07:45, 33:08:00, 34:08:15, 35:08:30, 36:08:45, 37:09:00, 38:09:15, 39:09:30, 40:09:45, 41:10:00, 42:10:15, 43:10:30, 44:10:45, 45:11:00, 46:11:15, 47:11:30, 48:11:45, 49:12:00, 50:12:15, 51:12:30, 52:12:45, 53:13:00, 54:13:15, 55:13:30, 56:13:45, 57:14:00, 58:14:15, 59:14:30, 60:14:45, 61:15:00, 62:15:15, 63:15:30, 64:15:45, 65:16:00, 66:16:15, 67:16:30, 68:16:45, 69:17:00, 70:17:15, 71:17:30, 72:17:45, 73:18:00, 74:18:15, 75:18:30, 76:18:45, 77:19:00, 78:19:15, 79:19:30, 80:19:45, 81:20:00, 82:20:15, 83:20:30, 84:20:45, 85:21:00, 86:21:15, 87:21:30, 88:21:45, 89:22:00, 90:22:15, 91:22:30, 92:22:45, 93:23:00, 94:23:15, 95:23:30, 96:23:45

[14] **activity\_2: From** <font color="maroon">%activity\_1%</font>, **what did you do?**

Categories: 1:Selling products and/or services in a shop, for self or household member, 2:Selling products and/or services door-to-door, for self or household member, 3:Sourcing and transporting products for trade e.g. day-old chicks, semen straws, feed, drugs etc, 4:Value -addition to the traded product e.g. processing meat, caring for the incubation process, grading etc, 5:Cleaning equipment and premises, 6:Communicating with suppliers, 7:Business group meetings (SACCO or ROSCA meetings, etc), 8:Business or self-employment activities (other than the agri-enterprise) for self or household member, 9:Work as employed, 10:Going to the bank, 11:Bookkeeping, 18:Sleeping and resting, 13:Eating and drinking, 14:Personal care, 15:School (incl. homework), 16:Cooking, 17:Domestic work (incl. fetching water, fuel), 12:Caring for children, 19:Caring for adults (sick, elderly), 20:Commuting (to/from work or school), 21:Traveling (not for work or school), 22:Exercising, 23:Social activities and hobbies, 24:Religious activities, 25:Weaving / sewing / textile care, 26:Farming, crop cultivation,, 27:Livestock raising (cattle, poultry, sheep, etc.), 28:Shopping / getting service (incl. health services), 29:Horticulture

[15] **endtime\_2: Until what time?** <font color="maroon">(%hrs\_2% hours %min\_2% minutes)</font>

Categories: 1:00:00, 2:00:15, 3:00:30, 4:00:45, 5:01:00, 6:01:15, 7:01:30, 8:01:45, 9:02:00, 10:02:15, 11:02:30, 12:02:45, 13:03:00, 14:03:15, 15:03:30, 16:03:45, 17:04:00, 18:04:15, 19:04:30, 20:04:45, 21:05:00, 22:05:15, 23:05:30, 24:05:45, 25:06:00, 26:06:15, 27:06:30, 28:06:45, 29:07:00, 30:07:15, 31:07:30, 32:07:45, 33:08:00, 34:08:15, 35:08:30, 36:08:45, 37:09:00, 38:09:15, 39:09:30, 40:09:45, 41:10:00, 42:10:15, 43:10:30, 44:10:45, 45:11:00, 46:11:15, 47:11:30, 48:11:45, 49:12:00, 50:12:15, 51:12:30, 52:12:45, 53:13:00, 54:13:15, 55:13:30, 56:13:45, 57:14:00, 58:14:15, 59:14:30, 60:14:45, 61:15:00, 62:15:15, 63:15:30, 64:15:45, 65:16:00, 66:16:15, 67:16:30, 68:16:45, 69:17:00, 70:17:15, 71:17:30, 72:17:45, 73:18:00, 74:18:15, 75:18:30, 76:18:45, 77:19:00, 78:19:15, 79:19:30, 80:19:45, 81:20:00, 82:20:15, 83:20:30, 84:20:45, 85:21:00, 86:21:15, 87:21:30, 88:21:45, 89:22:00, 90:22:15, 91:22:30, 92:22:45, 93:23:00, 94:23:15, 95:23:30, 96:23:45

[16] **activity\_3: From** <font color="maroon">%activity\_2%</font>, **what did you do?**

Categories: 1:Selling products and/or services in a shop, for self or household member, 2:Selling products and/or services door-to-door, for self or household member, 3:Sourcing and transporting products for trade e.g. day-old chicks, semen straws, feed, drugs etc, 4:Value -addition to the traded product e.g. processing meat, caring for the incubation process, grading etc, 5:Cleaning equipment and premises, 6:Communicating with suppliers, 7:Business group meetings (SACCO or ROSCA meetings, etc), 8:Business or self-employment activities (other than the agri-enterprise) for self or household member, 9:Work as employed, 10:Going to the bank, 11:Bookkeeping, 18:Sleeping and resting, 13:Eating and drinking, 14:Personal care, 15:School (incl. homework), 16:Cooking, 17:Domestic work (incl. fetching water, fuel), 12:Caring for children, 19:Caring for adults (sick, elderly), 20:Commuting (to/from work or school), 21:Traveling (not for work or school), 22:Exercising, 23:Social activities and hobbies, 24:Religious activities, 25:Weaving / sewing / textile care, 26:Farming, crop cultivation,, 27:Livestock raising (cattle, poultry, sheep, etc.), 28:Shopping / getting service (incl. health services), 29:Horticulture

[17] **endtime\_3: Until what time?** <font color="maroon">(%hrs\_3% hours %min\_3% minutes)</font>

Categories: 1:00:00, 2:00:15, 3:00:30, 4:00:45, 5:01:00, 6:01:15, 7:01:30, 8:01:45, 9:02:00, 10:02:15, 11:02:30, 12:02:45, 13:03:00, 14:03:15, 15:03:30, 16:03:45, 17:04:00, 18:04:15, 19:04:30, 20:04:45, 21:05:00, 22:05:15, 23:05:30, 24:05:45, 25:06:00, 26:06:15, 27:06:30, 28:06:45, 29:07:00, 30:07:15, 31:07:30, 32:07:45, 33:08:00, 34:08:15, 35:08:30, 36:08:45, 37:09:00, 38:09:15, 39:09:30, 40:09:45, 41:10:00, 42:10:15, 43:10:30, 44:10:45, 45:11:00, 46:11:15, 47:11:30, 48:11:45, 49:12:00, 50:12:15, 51:12:30, 52:12:45, 53:13:00, 54:13:15, 55:13:30, 56:13:45, 57:14:00, 58:14:15, 59:14:30, 60:14:45, 61:15:00, 62:15:15, 63:15:30, 64:15:45, 65:16:00, 66:16:15, 67:16:30, 68:16:45, 69:17:00, 70:17:15, 71:17:30, 72:17:45, 73:18:00, 74:18:15, 75:18:30, 76:18:45, 77:19:00, 78:19:15, 79:19:30, 80:19:45, 81:20:00, 82:20:15, 83:20:30, 84:20:45, 85:21:00, 86:21:15, 87:21:30, 88:21:45, 89:22:00, 90:22:15, 91:22:30, 92:22:45, 93:23:00, 94:23:15, 95:23:30, 96:23:45

[18] **activity\_4: From** <font color="maroon">%activity\_3%</font>, **what did you do?**

Categories: 1:Selling products and/or services in a shop, for self or household member, 2:Selling products and/or services door-to-door, for self or household member, 3:Sourcing and transporting products for trade e.g. day-old chicks, semen straws, feed, drugs etc, 4:Value -addition to the traded product e.g. processing meat, caring for the incubation process, grading etc, 5:Cleaning equipment and premises, 6:Communicating with suppliers, 7:Business group meetings (SACCO or ROSCA meetings, etc), 8:Business or self-employment activities (other than the agri-enterprise) for self or household member, 9:Work as employed, 10:Going to the bank, 11:Bookkeeping, 18:Sleeping and resting, 13:Eating and drinking, 14:Personal care, 15:School (incl. homework), 16:Cooking, 17:Domestic work (incl. fetching water, fuel), 12:Caring for children, 19:Caring for adults (sick, elderly), 20:Commuting (to/from work or school), 21:Traveling (not for

work or school), 22:Exercising, 23:Social activities and hobbies, 24:Religious activities, 25:Weaving / sewing / textile care, 26:Farming, crop cultivation,, 27:Livestock raising (cattle, poultry, sheep, etc.), 28:Shopping / getting service (incl. health services), 29:Horticulture

[19] [endtime\\_4: Until what time? <font color="maroon">\(%hrs\\_4% hours %min\\_4% minutes\)</font>](#)

Categories: 1:00:00, 2:00:15, 3:00:30, 4:00:45, 5:01:00, 6:01:15, 7:01:30, 8:01:45, 9:02:00, 10:02:15, 11:02:30, 12:02:45, 13:03:00, 14:03:15, 15:03:30, 16:03:45, 17:04:00, 18:04:15, 19:04:30, 20:04:45, 21:05:00, 22:05:15, 23:05:30, 24:05:45, 25:06:00, 26:06:15, 27:06:30, 28:06:45, 29:07:00, 30:07:15, 31:07:30, 32:07:45, 33:08:00, 34:08:15, 35:08:30, 36:08:45, 37:09:00, 38:09:15, 39:09:30, 40:09:45, 41:10:00, 42:10:15, 43:10:30, 44:10:45, 45:11:00, 46:11:15, 47:11:30, 48:11:45, 49:12:00, 50:12:15, 51:12:30, 52:12:45, 53:13:00, 54:13:15, 55:13:30, 56:13:45, 57:14:00, 58:14:15, 59:14:30, 60:14:45, 61:15:00, 62:15:15, 63:15:30, 64:15:45, 65:16:00, 66:16:15, 67:16:30, 68:16:45, 69:17:00, 70:17:15, 71:17:30, 72:17:45, 73:18:00, 74:18:15, 75:18:30, 76:18:45, 77:19:00, 78:19:15, 79:19:30, 80:19:45, 81:20:00, 82:20:15, 83:20:30, 84:20:45, 85:21:00, 86:21:15, 87:21:30, 88:21:45, 89:22:00, 90:22:15, 91:22:30, 92:22:45, 93:23:00, 94:23:15, 95:23:30, 96:23:45

[20] [activity\\_5: From <font color="maroon">%activity\\_4%</font>, what did you do?](#)

Categories: 1:Selling products and/or services in a shop, for self or household member, 2:Selling products and/or services door-to-door, for self or household member, 3:Sourcing and transporting products for trade e.g. day-old chicks, semen straws, feed, drugs etc, 4:Value -addition to the traded product e.g. processing meat, caring for the incubation process, grading etc, 5:Cleaning equipment and premises, 6:Communicating with suppliers, 7:Business group meetings (SACCO or ROSCA meetings, etc), 8:Business or self-employment activities (other than the agri-enterprise) for self or household member, 9:Work as employed, 10:Going to the bank, 11:Bookkeeping, 18:Sleeping and resting, 13:Eating and drinking, 14:Personal care, 15:School (incl. homework), 16:Cooking, 17:Domestic work (incl. fetching water, fuel), 12:Caring for children, 19:Caring for adults (sick, elderly), 20:Commuting (to/from work or school), 21:Traveling (not for work or school), 22:Exercising, 23:Social activities and hobbies, 24:Religious activities, 25:Weaving / sewing / textile care, 26:Farming, crop cultivation,, 27:Livestock raising (cattle, poultry, sheep, etc.), 28:Shopping / getting service (incl. health services), 29:Horticulture

[21] [endtime\\_5: Until what time? <font color="maroon">\(%hrs\\_5% hours %min\\_5% minutes\)</font>](#)

Categories: 1:00:00, 2:00:15, 3:00:30, 4:00:45, 5:01:00, 6:01:15, 7:01:30, 8:01:45, 9:02:00, 10:02:15, 11:02:30, 12:02:45, 13:03:00, 14:03:15, 15:03:30, 16:03:45, 17:04:00, 18:04:15, 19:04:30, 20:04:45, 21:05:00, 22:05:15, 23:05:30, 24:05:45, 25:06:00, 26:06:15, 27:06:30, 28:06:45, 29:07:00, 30:07:15, 31:07:30, 32:07:45, 33:08:00, 34:08:15, 35:08:30, 36:08:45, 37:09:00, 38:09:15, 39:09:30, 40:09:45, 41:10:00, 42:10:15, 43:10:30, 44:10:45, 45:11:00, 46:11:15, 47:11:30, 48:11:45, 49:12:00, 50:12:15, 51:12:30, 52:12:45, 53:13:00, 54:13:15, 55:13:30, 56:13:45, 57:14:00, 58:14:15, 59:14:30, 60:14:45, 61:15:00, 62:15:15, 63:15:30, 64:15:45, 65:16:00, 66:16:15, 67:16:30, 68:16:45, 69:17:00, 70:17:15, 71:17:30, 72:17:45, 73:18:00, 74:18:15, 75:18:30, 76:18:45, 77:19:00, 78:19:15, 79:19:30, 80:19:45, 81:20:00, 82:20:15, 83:20:30, 84:20:45, 85:21:00, 86:21:15, 87:21:30, 88:21:45, 89:22:00, 90:22:15, 91:22:30, 92:22:45, 93:23:00, 94:23:15, 95:23:30, 96:23:45

[22] [activity\\_6: From <font color="maroon">%activity\\_5%</font>, what did you do?](#)

Categories: 1:Selling products and/or services in a shop, for self or household member, 2:Selling products and/or services door-to-door, for self or household member, 3:Sourcing and transporting products for trade e.g. day-old chicks, semen straws, feed, drugs etc, 4:Value -addition to the traded product e.g. processing meat, caring for the incubation process, grading etc, 5:Cleaning equipment and premises, 6:Communicating with suppliers, 7:Business group meetings (SACCO or ROSCA meetings, etc), 8:Business or self-employment activities (other than the agri-enterprise) for self or household member, 9:Work as employed, 10:Going to the bank, 11:Bookkeeping, 18:Sleeping and resting, 13:Eating and drinking, 14:Personal care, 15:School (incl. homework), 16:Cooking, 17:Domestic work (incl. fetching water, fuel), 12:Caring for children, 19:Caring for adults (sick, elderly), 20:Commuting (to/from work or school), 21:Traveling (not for work or school), 22:Exercising, 23:Social activities and hobbies, 24:Religious activities, 25:Weaving / sewing / textile care, 26:Farming, crop cultivation,, 27:Livestock raising (cattle, poultry, sheep, etc.), 28:Shopping / getting service (incl. health services), 29:Horticulture

[23] [endtime\\_6: Until what time? <font color="maroon">\(%hrs\\_6% hours %min\\_6% minutes\)</font>](#)

Categories: 1:00:00, 2:00:15, 3:00:30, 4:00:45, 5:01:00, 6:01:15, 7:01:30, 8:01:45, 9:02:00, 10:02:15, 11:02:30, 12:02:45, 13:03:00, 14:03:15, 15:03:30, 16:03:45, 17:04:00, 18:04:15, 19:04:30, 20:04:45, 21:05:00, 22:05:15, 23:05:30, 24:05:45, 25:06:00, 26:06:15, 27:06:30, 28:06:45, 29:07:00, 30:07:15, 31:07:30, 32:07:45, 33:08:00, 34:08:15, 35:08:30, 36:08:45, 37:09:00, 38:09:15, 39:09:30, 40:09:45, 41:10:00, 42:10:15, 43:10:30, 44:10:45, 45:11:00, 46:11:15, 47:11:30, 48:11:45, 49:12:00, 50:12:15, 51:12:30, 52:12:45, 53:13:00, 54:13:15, 55:13:30, 56:13:45, 57:14:00, 58:14:15, 59:14:30, 60:14:45, 61:15:00, 62:15:15, 63:15:30, 64:15:45, 65:16:00, 66:16:15, 67:16:30, 68:16:45, 69:17:00, 70:17:15, 71:17:30, 72:17:45, 73:18:00, 74:18:15, 75:18:30, 76:18:45, 77:19:00, 78:19:15, 79:19:30, 80:19:45, 81:20:00, 82:20:15, 83:20:30, 84:20:45, 85:21:00, 86:21:15, 87:21:30, 88:21:45, 89:22:00, 90:22:15, 91:22:30, 92:22:45, 93:23:00, 94:23:15, 95:23:30, 96:23:45

[24] [activity\\_7: From <font color="maroon">%activity\\_6%</font>, what did you do?](#)

Categories: 1:Selling products and/or services in a shop, for self or household member, 2:Selling products and/or services door-to-door, for self or household member, 3:Sourcing and transporting products for trade e.g. day-old chicks, semen straws, feed, drugs etc, 4:Value -addition to the traded product e.g. processing meat, caring for the incubation process, grading etc, 5:Cleaning equipment and premises, 6:Communicating with suppliers, 7:Business group meetings (SACCO or ROSCA meetings, etc), 8:Business or self-employment activities (other than the agri-enterprise) for self or household member, 9:Work as employed, 10:Going to the bank, 11:Bookkeeping, 18:Sleeping and resting, 13:Eating and drinking, 14:Personal care, 15:School (incl. homework), 16:Cooking, 17:Domestic work (incl. fetching water, fuel), 12:Caring for children, 19:Caring for adults (sick, elderly), 20:Commuting (to/from work or school), 21:Traveling (not for work or school), 22:Exercising, 23:Social activities and hobbies, 24:Religious activities, 25:Weaving / sewing / textile care,

26:Farming, crop cultivation,, 27:Livestock raising (cattle, poultry, sheep, etc.), 28:Shopping / getting service (incl. health services), 29:Horticulture

[25] [endtime\\_7: Until what time? <font color="maroon">\(%hrs\\_7% hours %min\\_7% minutes\)</font>](#)

Categories: 1:00:00, 2:00:15, 3:00:30, 4:00:45, 5:01:00, 6:01:15, 7:01:30, 8:01:45, 9:02:00, 10:02:15, 11:02:30, 12:02:45, 13:03:00, 14:03:15, 15:03:30, 16:03:45, 17:04:00, 18:04:15, 19:04:30, 20:04:45, 21:05:00, 22:05:15, 23:05:30, 24:05:45, 25:06:00, 26:06:15, 27:06:30, 28:06:45, 29:07:00, 30:07:15, 31:07:30, 32:07:45, 33:08:00, 34:08:15, 35:08:30, 36:08:45, 37:09:00, 38:09:15, 39:09:30, 40:09:45, 41:10:00, 42:10:15, 43:10:30, 44:10:45, 45:11:00, 46:11:15, 47:11:30, 48:11:45, 49:12:00, 50:12:15, 51:12:30, 52:12:45, 53:13:00, 54:13:15, 55:13:30, 56:13:45, 57:14:00, 58:14:15, 59:14:30, 60:14:45, 61:15:00, 62:15:15, 63:15:30, 64:15:45, 65:16:00, 66:16:15, 67:16:30, 68:16:45, 69:17:00, 70:17:15, 71:17:30, 72:17:45, 73:18:00, 74:18:15, 75:18:30, 76:18:45, 77:19:00, 78:19:15, 79:19:30, 80:19:45, 81:20:00, 82:20:15, 83:20:30, 84:20:45, 85:21:00, 86:21:15, 87:21:30, 88:21:45, 89:22:00, 90:22:15, 91:22:30, 92:22:45, 93:23:00, 94:23:15, 95:23:30, 96:23:45

[26] [activity\\_8: From <font color="maroon">%activity\\_7%</font>, what did you do?](#)

Categories: 1:Selling products and/or services in a shop, for self or household member, 2:Selling products and/or services door-to-door, for self or household member, 3:Sourcing and transporting products for trade e.g. day-old chicks, semen straws, feed, drugs etc, 4:Value -addition to the traded product e.g. processing meat, caring for the incubation process, grading etc, 5:Cleaning equipment and premises, 6:Communicating with suppliers, 7:Business group meetings (SACCO or ROSCA meetings, etc), 8:Business or self-employment activities (other than the agri-enterprise) for self or household member, 9:Work as employed, 10:Going to the bank, 11:Bookkeeping, 18:Sleeping and resting, 13:Eating and drinking, 14:Personal care, 15:School (incl. homework), 16:Cooking, 17:Domestic work (incl. fetching water, fuel), 12:Caring for children, 19:Caring for adults (sick, elderly), 20:Commuting (to/from work or school), 21:Traveling (not for work or school), 22:Exercising, 23:Social activities and hobbies, 24:Religious activities, 25:Weaving / sewing / textile care, 26:Farming, crop cultivation,, 27:Livestock raising (cattle, poultry, sheep, etc.), 28:Shopping / getting service (incl. health services), 29:Horticulture

[27] [endtime\\_8: Until what time? <font color="maroon">\(%hrs\\_8% hours %min\\_8% minutes\)</font>](#)

Categories: 1:00:00, 2:00:15, 3:00:30, 4:00:45, 5:01:00, 6:01:15, 7:01:30, 8:01:45, 9:02:00, 10:02:15, 11:02:30, 12:02:45, 13:03:00, 14:03:15, 15:03:30, 16:03:45, 17:04:00, 18:04:15, 19:04:30, 20:04:45, 21:05:00, 22:05:15, 23:05:30, 24:05:45, 25:06:00, 26:06:15, 27:06:30, 28:06:45, 29:07:00, 30:07:15, 31:07:30, 32:07:45, 33:08:00, 34:08:15, 35:08:30, 36:08:45, 37:09:00, 38:09:15, 39:09:30, 40:09:45, 41:10:00, 42:10:15, 43:10:30, 44:10:45, 45:11:00, 46:11:15, 47:11:30, 48:11:45, 49:12:00, 50:12:15, 51:12:30, 52:12:45, 53:13:00, 54:13:15, 55:13:30, 56:13:45, 57:14:00, 58:14:15, 59:14:30, 60:14:45, 61:15:00, 62:15:15, 63:15:30, 64:15:45, 65:16:00, 66:16:15, 67:16:30, 68:16:45, 69:17:00, 70:17:15, 71:17:30, 72:17:45, 73:18:00, 74:18:15, 75:18:30, 76:18:45, 77:19:00, 78:19:15, 79:19:30, 80:19:45, 81:20:00, 82:20:15, 83:20:30, 84:20:45, 85:21:00, 86:21:15, 87:21:30, 88:21:45, 89:22:00, 90:22:15, 91:22:30, 92:22:45, 93:23:00, 94:23:15, 95:23:30, 96:23:45

[28] [activity\\_9: From <font color="maroon">%activity\\_8%</font>, what did you do?](#)

Categories: 1:Selling products and/or services in a shop, for self or household member, 2:Selling products and/or services door-to-door, for self or household member, 3:Sourcing and transporting products for trade e.g. day-old chicks, semen straws, feed, drugs etc, 4:Value -addition to the traded product e.g. processing meat, caring for the incubation process, grading etc, 5:Cleaning equipment and premises, 6:Communicating with suppliers, 7:Business group meetings (SACCO or ROSCA meetings, etc), 8:Business or self-employment activities (other than the agri-enterprise) for self or household member, 9:Work as employed, 10:Going to the bank, 11:Bookkeeping, 18:Sleeping and resting, 13:Eating and drinking, 14:Personal care, 15:School (incl. homework), 16:Cooking, 17:Domestic work (incl. fetching water, fuel), 12:Caring for children, 19:Caring for adults (sick, elderly), 20:Commuting (to/from work or school), 21:Traveling (not for work or school), 22:Exercising, 23:Social activities and hobbies, 24:Religious activities, 25:Weaving / sewing / textile care, 26:Farming, crop cultivation,, 27:Livestock raising (cattle, poultry, sheep, etc.), 28:Shopping / getting service (incl. health services), 29:Horticulture

[29] [endtime\\_9: Until what time? <font color="maroon">\(%hrs\\_9% hours %min\\_9% minutes\)</font>](#)

Categories: 1:00:00, 2:00:15, 3:00:30, 4:00:45, 5:01:00, 6:01:15, 7:01:30, 8:01:45, 9:02:00, 10:02:15, 11:02:30, 12:02:45, 13:03:00, 14:03:15, 15:03:30, 16:03:45, 17:04:00, 18:04:15, 19:04:30, 20:04:45, 21:05:00, 22:05:15, 23:05:30, 24:05:45, 25:06:00, 26:06:15, 27:06:30, 28:06:45, 29:07:00, 30:07:15, 31:07:30, 32:07:45, 33:08:00, 34:08:15, 35:08:30, 36:08:45, 37:09:00, 38:09:15, 39:09:30, 40:09:45, 41:10:00, 42:10:15, 43:10:30, 44:10:45, 45:11:00, 46:11:15, 47:11:30, 48:11:45, 49:12:00, 50:12:15, 51:12:30, 52:12:45, 53:13:00, 54:13:15, 55:13:30, 56:13:45, 57:14:00, 58:14:15, 59:14:30, 60:14:45, 61:15:00, 62:15:15, 63:15:30, 64:15:45, 65:16:00, 66:16:15, 67:16:30, 68:16:45, 69:17:00, 70:17:15, 71:17:30, 72:17:45, 73:18:00, 74:18:15, 75:18:30, 76:18:45, 77:19:00, 78:19:15, 79:19:30, 80:19:45, 81:20:00, 82:20:15, 83:20:30, 84:20:45, 85:21:00, 86:21:15, 87:21:30, 88:21:45, 89:22:00, 90:22:15, 91:22:30, 92:22:45, 93:23:00, 94:23:15, 95:23:30, 96:23:45

[30] [activity\\_10: From <font color="maroon">%activity\\_9%</font>, what did you do?](#)

Categories: 1:Selling products and/or services in a shop, for self or household member, 2:Selling products and/or services door-to-door, for self or household member, 3:Sourcing and transporting products for trade e.g. day-old chicks, semen straws, feed, drugs etc, 4:Value -addition to the traded product e.g. processing meat, caring for the incubation process, grading etc, 5:Cleaning equipment and premises, 6:Communicating with suppliers, 7:Business group meetings (SACCO or ROSCA meetings, etc), 8:Business or self-employment activities (other than the agri-enterprise) for self or household member, 9:Work as employed, 10:Going to the bank, 11:Bookkeeping, 18:Sleeping and resting, 13:Eating and drinking, 14:Personal care, 15:School (incl. homework), 16:Cooking, 17:Domestic work (incl. fetching water, fuel), 12:Caring for children, 19:Caring for adults (sick, elderly), 20:Commuting (to/from work or school), 21:Traveling (not for work or school), 22:Exercising, 23:Social activities and hobbies, 24:Religious activities, 25:Weaving / sewing / textile care,

26:Farming, crop cultivation,, 27:Livestock raising (cattle, poultry, sheep, etc.), 28:Shopping / getting service (incl. health services), 29:Horticulture

[31] [endtime\\_10: Until what time? <font color="maroon">\(%hrs\\_10% hours %min\\_10% minutes\)</font>](#)

Categories: 1:00:00, 2:00:15, 3:00:30, 4:00:45, 5:01:00, 6:01:15, 7:01:30, 8:01:45, 9:02:00, 10:02:15, 11:02:30, 12:02:45, 13:03:00, 14:03:15, 15:03:30, 16:03:45, 17:04:00, 18:04:15, 19:04:30, 20:04:45, 21:05:00, 22:05:15, 23:05:30, 24:05:45, 25:06:00, 26:06:15, 27:06:30, 28:06:45, 29:07:00, 30:07:15, 31:07:30, 32:07:45, 33:08:00, 34:08:15, 35:08:30, 36:08:45, 37:09:00, 38:09:15, 39:09:30, 40:09:45, 41:10:00, 42:10:15, 43:10:30, 44:10:45, 45:11:00, 46:11:15, 47:11:30, 48:11:45, 49:12:00, 50:12:15, 51:12:30, 52:12:45, 53:13:00, 54:13:15, 55:13:30, 56:13:45, 57:14:00, 58:14:15, 59:14:30, 60:14:45, 61:15:00, 62:15:15, 63:15:30, 64:15:45, 65:16:00, 66:16:15, 67:16:30, 68:16:45, 69:17:00, 70:17:15, 71:17:30, 72:17:45, 73:18:00, 74:18:15, 75:18:30, 76:18:45, 77:19:00, 78:19:15, 79:19:30, 80:19:45, 81:20:00, 82:20:15, 83:20:30, 84:20:45, 85:21:00, 86:21:15, 87:21:30, 88:21:45, 89:22:00, 90:22:15, 91:22:30, 92:22:45, 93:23:00, 94:23:15, 95:23:30, 96:23:45

[32] [activity\\_11: From <font color="maroon">%activity\\_10%</font>, what did you do?](#)

Categories: 1:Selling products and/or services in a shop, for self or household member, 2:Selling products and/or services door-to-door, for self or household member, 3:Sourcing and transporting products for trade e.g. day-old chicks, semen straws, feed, drugs etc, 4:Value -addition to the traded product e.g. processing meat, caring for the incubation process, grading etc, 5:Cleaning equipment and premises, 6:Communicating with suppliers, 7:Business group meetings (SACCO or ROSCA meetings, etc), 8:Business or self-employment activities (other than the agri-enterprise) for self or household member, 9:Work as employed, 10:Going to the bank, 11:Bookkeeping, 18:Sleeping and resting, 13:Eating and drinking, 14:Personal care, 15:School (incl. homework), 16:Cooking, 17:Domestic work (incl. fetching water, fuel), 12:Caring for children, 19:Caring for adults (sick, elderly), 20:Commuting (to/from work or school), 21:Traveling (not for work or school), 22:Exercising, 23:Social activities and hobbies, 24:Religious activities, 25:Weaving / sewing / textile care, 26:Farming, crop cultivation,, 27:Livestock raising (cattle, poultry, sheep, etc.), 28:Shopping / getting service (incl. health services), 29:Horticulture

[33] [endtime\\_11: Until what time? <font color="maroon">\(%hrs\\_11% hours %min\\_11% minutes\)</font>](#)

Categories: 1:00:00, 2:00:15, 3:00:30, 4:00:45, 5:01:00, 6:01:15, 7:01:30, 8:01:45, 9:02:00, 10:02:15, 11:02:30, 12:02:45, 13:03:00, 14:03:15, 15:03:30, 16:03:45, 17:04:00, 18:04:15, 19:04:30, 20:04:45, 21:05:00, 22:05:15, 23:05:30, 24:05:45, 25:06:00, 26:06:15, 27:06:30, 28:06:45, 29:07:00, 30:07:15, 31:07:30, 32:07:45, 33:08:00, 34:08:15, 35:08:30, 36:08:45, 37:09:00, 38:09:15, 39:09:30, 40:09:45, 41:10:00, 42:10:15, 43:10:30, 44:10:45, 45:11:00, 46:11:15, 47:11:30, 48:11:45, 49:12:00, 50:12:15, 51:12:30, 52:12:45, 53:13:00, 54:13:15, 55:13:30, 56:13:45, 57:14:00, 58:14:15, 59:14:30, 60:14:45, 61:15:00, 62:15:15, 63:15:30, 64:15:45, 65:16:00, 66:16:15, 67:16:30, 68:16:45, 69:17:00, 70:17:15, 71:17:30, 72:17:45, 73:18:00, 74:18:15, 75:18:30, 76:18:45, 77:19:00, 78:19:15, 79:19:30, 80:19:45, 81:20:00, 82:20:15, 83:20:30, 84:20:45, 85:21:00, 86:21:15, 87:21:30, 88:21:45, 89:22:00, 90:22:15, 91:22:30, 92:22:45, 93:23:00, 94:23:15, 95:23:30, 96:23:45

[34] [activity\\_12: From <font color="maroon">%activity\\_11%</font>, what did you do?](#)

Categories: 1:Selling products and/or services in a shop, for self or household member, 2:Selling products and/or services door-to-door, for self or household member, 3:Sourcing and transporting products for trade e.g. day-old chicks, semen straws, feed, drugs etc, 4:Value -addition to the traded product e.g. processing meat, caring for the incubation process, grading etc, 5:Cleaning equipment and premises, 6:Communicating with suppliers, 7:Business group meetings (SACCO or ROSCA meetings, etc), 8:Business or self-employment activities (other than the agri-enterprise) for self or household member, 9:Work as employed, 10:Going to the bank, 11:Bookkeeping, 18:Sleeping and resting, 13:Eating and drinking, 14:Personal care, 15:School (incl. homework), 16:Cooking, 17:Domestic work (incl. fetching water, fuel), 12:Caring for children, 19:Caring for adults (sick, elderly), 20:Commuting (to/from work or school), 21:Traveling (not for work or school), 22:Exercising, 23:Social activities and hobbies, 24:Religious activities, 25:Weaving / sewing / textile care, 26:Farming, crop cultivation,, 27:Livestock raising (cattle, poultry, sheep, etc.), 28:Shopping / getting service (incl. health services), 29:Horticulture

[35] [endtime\\_12: Until what time? <font color="maroon">\(%hrs\\_12% hours %min\\_12% minutes\)</font>](#)

Categories: 1:00:00, 2:00:15, 3:00:30, 4:00:45, 5:01:00, 6:01:15, 7:01:30, 8:01:45, 9:02:00, 10:02:15, 11:02:30, 12:02:45, 13:03:00, 14:03:15, 15:03:30, 16:03:45, 17:04:00, 18:04:15, 19:04:30, 20:04:45, 21:05:00, 22:05:15, 23:05:30, 24:05:45, 25:06:00, 26:06:15, 27:06:30, 28:06:45, 29:07:00, 30:07:15, 31:07:30, 32:07:45, 33:08:00, 34:08:15, 35:08:30, 36:08:45, 37:09:00, 38:09:15, 39:09:30, 40:09:45, 41:10:00, 42:10:15, 43:10:30, 44:10:45, 45:11:00, 46:11:15, 47:11:30, 48:11:45, 49:12:00, 50:12:15, 51:12:30, 52:12:45, 53:13:00, 54:13:15, 55:13:30, 56:13:45, 57:14:00, 58:14:15, 59:14:30, 60:14:45, 61:15:00, 62:15:15, 63:15:30, 64:15:45, 65:16:00, 66:16:15, 67:16:30, 68:16:45, 69:17:00, 70:17:15, 71:17:30, 72:17:45, 73:18:00, 74:18:15, 75:18:30, 76:18:45, 77:19:00, 78:19:15, 79:19:30, 80:19:45, 81:20:00, 82:20:15, 83:20:30, 84:20:45, 85:21:00, 86:21:15, 87:21:30, 88:21:45, 89:22:00, 90:22:15, 91:22:30, 92:22:45, 93:23:00, 94:23:15, 95:23:30, 96:23:45

[36] [activity\\_13: From <font color="maroon">%activity\\_12%</font>, what did you do?](#)

Categories: 1:Selling products and/or services in a shop, for self or household member, 2:Selling products and/or services door-to-door, for self or household member, 3:Sourcing and transporting products for trade e.g. day-old chicks, semen straws, feed, drugs etc, 4:Value -addition to the traded product e.g. processing meat, caring for the incubation process, grading etc, 5:Cleaning equipment and premises, 6:Communicating with suppliers, 7:Business group meetings (SACCO or ROSCA meetings, etc), 8:Business or self-employment activities (other than the agri-enterprise) for self or household member, 9:Work as employed, 10:Going to the bank, 11:Bookkeeping, 18:Sleeping and resting, 13:Eating and drinking, 14:Personal care, 15:School (incl. homework), 16:Cooking, 17:Domestic work (incl. fetching water, fuel), 12:Caring for children, 19:Caring for adults (sick, elderly), 20:Commuting (to/from work or school), 21:Traveling (not for work or school), 22:Exercising, 23:Social activities and hobbies, 24:Religious activities, 25:Weaving / sewing / textile care,

26:Farming, crop cultivation,, 27:Livestock raising (cattle, poultry, sheep, etc.), 28:Shopping / getting service (incl. health services), 29:Horticulture

[37] [endtime\\_13: Until what time? <font color="maroon">\(%hrs\\_13% hours %min\\_13% minutes\)</font>](#)

Categories: 1:00:00, 2:00:15, 3:00:30, 4:00:45, 5:01:00, 6:01:15, 7:01:30, 8:01:45, 9:02:00, 10:02:15, 11:02:30, 12:02:45, 13:03:00, 14:03:15, 15:03:30, 16:03:45, 17:04:00, 18:04:15, 19:04:30, 20:04:45, 21:05:00, 22:05:15, 23:05:30, 24:05:45, 25:06:00, 26:06:15, 27:06:30, 28:06:45, 29:07:00, 30:07:15, 31:07:30, 32:07:45, 33:08:00, 34:08:15, 35:08:30, 36:08:45, 37:09:00, 38:09:15, 39:09:30, 40:09:45, 41:10:00, 42:10:15, 43:10:30, 44:10:45, 45:11:00, 46:11:15, 47:11:30, 48:11:45, 49:12:00, 50:12:15, 51:12:30, 52:12:45, 53:13:00, 54:13:15, 55:13:30, 56:13:45, 57:14:00, 58:14:15, 59:14:30, 60:14:45, 61:15:00, 62:15:15, 63:15:30, 64:15:45, 65:16:00, 66:16:15, 67:16:30, 68:16:45, 69:17:00, 70:17:15, 71:17:30, 72:17:45, 73:18:00, 74:18:15, 75:18:30, 76:18:45, 77:19:00, 78:19:15, 79:19:30, 80:19:45, 81:20:00, 82:20:15, 83:20:30, 84:20:45, 85:21:00, 86:21:15, 87:21:30, 88:21:45, 89:22:00, 90:22:15, 91:22:30, 92:22:45, 93:23:00, 94:23:15, 95:23:30, 96:23:45

[38] [activity\\_14: From <font color="maroon">%activity\\_13%</font>, what did you do?](#)

Categories: 1:Selling products and/or services in a shop, for self or household member, 2:Selling products and/or services door-to-door, for self or household member, 3:Sourcing and transporting products for trade e.g. day-old chicks, semen straws, feed, drugs etc, 4:Value -addition to the traded product e.g. processing meat, caring for the incubation process, grading etc, 5:Cleaning equipment and premises, 6:Communicating with suppliers, 7:Business group meetings (SACCO or ROSCA meetings, etc), 8:Business or self-employment activities (other than the agri-enterprise) for self or household member, 9:Work as employed, 10:Going to the bank, 11:Bookkeeping, 18:Sleeping and resting, 13:Eating and drinking, 14:Personal care, 15:School (incl. homework), 16:Cooking, 17:Domestic work (incl. fetching water, fuel), 12:Caring for children, 19:Caring for adults (sick, elderly), 20:Commuting (to/from work or school), 21:Traveling (not for work or school), 22:Exercising, 23:Social activities and hobbies, 24:Religious activities, 25:Weaving / sewing / textile care, 26:Farming, crop cultivation,, 27:Livestock raising (cattle, poultry, sheep, etc.), 28:Shopping / getting service (incl. health services), 29:Horticulture

[39] [endtime\\_14: Until what time? <font color="maroon">\(%hrs\\_14% hours %min\\_14% minutes\)</font>](#)

Categories: 1:00:00, 2:00:15, 3:00:30, 4:00:45, 5:01:00, 6:01:15, 7:01:30, 8:01:45, 9:02:00, 10:02:15, 11:02:30, 12:02:45, 13:03:00, 14:03:15, 15:03:30, 16:03:45, 17:04:00, 18:04:15, 19:04:30, 20:04:45, 21:05:00, 22:05:15, 23:05:30, 24:05:45, 25:06:00, 26:06:15, 27:06:30, 28:06:45, 29:07:00, 30:07:15, 31:07:30, 32:07:45, 33:08:00, 34:08:15, 35:08:30, 36:08:45, 37:09:00, 38:09:15, 39:09:30, 40:09:45, 41:10:00, 42:10:15, 43:10:30, 44:10:45, 45:11:00, 46:11:15, 47:11:30, 48:11:45, 49:12:00, 50:12:15, 51:12:30, 52:12:45, 53:13:00, 54:13:15, 55:13:30, 56:13:45, 57:14:00, 58:14:15, 59:14:30, 60:14:45, 61:15:00, 62:15:15, 63:15:30, 64:15:45, 65:16:00, 66:16:15, 67:16:30, 68:16:45, 69:17:00, 70:17:15, 71:17:30, 72:17:45, 73:18:00, 74:18:15, 75:18:30, 76:18:45, 77:19:00, 78:19:15, 79:19:30, 80:19:45, 81:20:00, 82:20:15, 83:20:30, 84:20:45, 85:21:00, 86:21:15, 87:21:30, 88:21:45, 89:22:00, 90:22:15, 91:22:30, 92:22:45, 93:23:00, 94:23:15, 95:23:30, 96:23:45

[40] [activity\\_15: From <font color="maroon">%activity\\_14%</font>, what did you do?](#)

Categories: 1:Selling products and/or services in a shop, for self or household member, 2:Selling products and/or services door-to-door, for self or household member, 3:Sourcing and transporting products for trade e.g. day-old chicks, semen straws, feed, drugs etc, 4:Value -addition to the traded product e.g. processing meat, caring for the incubation process, grading etc, 5:Cleaning equipment and premises, 6:Communicating with suppliers, 7:Business group meetings (SACCO or ROSCA meetings, etc), 8:Business or self-employment activities (other than the agri-enterprise) for self or household member, 9:Work as employed, 10:Going to the bank, 11:Bookkeeping, 18:Sleeping and resting, 13:Eating and drinking, 14:Personal care, 15:School (incl. homework), 16:Cooking, 17:Domestic work (incl. fetching water, fuel), 12:Caring for children, 19:Caring for adults (sick, elderly), 20:Commuting (to/from work or school), 21:Traveling (not for work or school), 22:Exercising, 23:Social activities and hobbies, 24:Religious activities, 25:Weaving / sewing / textile care, 26:Farming, crop cultivation,, 27:Livestock raising (cattle, poultry, sheep, etc.), 28:Shopping / getting service (incl. health services), 29:Horticulture

[41] [endtime\\_15: Until what time? <font color="maroon">\(%hrs\\_15% hours %min\\_15% minutes\)</font>](#)

Categories: 1:00:00, 2:00:15, 3:00:30, 4:00:45, 5:01:00, 6:01:15, 7:01:30, 8:01:45, 9:02:00, 10:02:15, 11:02:30, 12:02:45, 13:03:00, 14:03:15, 15:03:30, 16:03:45, 17:04:00, 18:04:15, 19:04:30, 20:04:45, 21:05:00, 22:05:15, 23:05:30, 24:05:45, 25:06:00, 26:06:15, 27:06:30, 28:06:45, 29:07:00, 30:07:15, 31:07:30, 32:07:45, 33:08:00, 34:08:15, 35:08:30, 36:08:45, 37:09:00, 38:09:15, 39:09:30, 40:09:45, 41:10:00, 42:10:15, 43:10:30, 44:10:45, 45:11:00, 46:11:15, 47:11:30, 48:11:45, 49:12:00, 50:12:15, 51:12:30, 52:12:45, 53:13:00, 54:13:15, 55:13:30, 56:13:45, 57:14:00, 58:14:15, 59:14:30, 60:14:45, 61:15:00, 62:15:15, 63:15:30, 64:15:45, 65:16:00, 66:16:15, 67:16:30, 68:16:45, 69:17:00, 70:17:15, 71:17:30, 72:17:45, 73:18:00, 74:18:15, 75:18:30, 76:18:45, 77:19:00, 78:19:15, 79:19:30, 80:19:45, 81:20:00, 82:20:15, 83:20:30, 84:20:45, 85:21:00, 86:21:15, 87:21:30, 88:21:45, 89:22:00, 90:22:15, 91:22:30, 92:22:45, 93:23:00, 94:23:15, 95:23:30, 96:23:45

[42] [activity\\_16: From <font color="maroon">%activity\\_15%</font>, what did you do?](#)

Categories: 1:Selling products and/or services in a shop, for self or household member, 2:Selling products and/or services door-to-door, for self or household member, 3:Sourcing and transporting products for trade e.g. day-old chicks, semen straws, feed, drugs etc, 4:Value -addition to the traded product e.g. processing meat, caring for the incubation process, grading etc, 5:Cleaning equipment and premises, 6:Communicating with suppliers, 7:Business group meetings (SACCO or ROSCA meetings, etc), 8:Business or self-employment activities (other than the agri-enterprise) for self or household member, 9:Work as employed, 10:Going to the bank, 11:Bookkeeping, 18:Sleeping and resting, 13:Eating and drinking, 14:Personal care, 15:School (incl. homework), 16:Cooking, 17:Domestic work (incl. fetching water, fuel), 12:Caring for children, 19:Caring for adults (sick, elderly), 20:Commuting (to/from work or school), 21:Traveling (not for work or school), 22:Exercising, 23:Social activities and hobbies, 24:Religious activities, 25:Weaving / sewing / textile care,

26:Farming, crop cultivation,, 27:Livestock raising (cattle, poultry, sheep, etc.), 28:Shopping / getting service (incl. health services), 29:Horticulture

[43] [endtime\\_16: Until what time? <font color="maroon">\(%hrs\\_16% hours %min\\_16% minutes\)</font>](#)

Categories: 1:00:00, 2:00:15, 3:00:30, 4:00:45, 5:01:00, 6:01:15, 7:01:30, 8:01:45, 9:02:00, 10:02:15, 11:02:30, 12:02:45, 13:03:00, 14:03:15, 15:03:30, 16:03:45, 17:04:00, 18:04:15, 19:04:30, 20:04:45, 21:05:00, 22:05:15, 23:05:30, 24:05:45, 25:06:00, 26:06:15, 27:06:30, 28:06:45, 29:07:00, 30:07:15, 31:07:30, 32:07:45, 33:08:00, 34:08:15, 35:08:30, 36:08:45, 37:09:00, 38:09:15, 39:09:30, 40:09:45, 41:10:00, 42:10:15, 43:10:30, 44:10:45, 45:11:00, 46:11:15, 47:11:30, 48:11:45, 49:12:00, 50:12:15, 51:12:30, 52:12:45, 53:13:00, 54:13:15, 55:13:30, 56:13:45, 57:14:00, 58:14:15, 59:14:30, 60:14:45, 61:15:00, 62:15:15, 63:15:30, 64:15:45, 65:16:00, 66:16:15, 67:16:30, 68:16:45, 69:17:00, 70:17:15, 71:17:30, 72:17:45, 73:18:00, 74:18:15, 75:18:30, 76:18:45, 77:19:00, 78:19:15, 79:19:30, 80:19:45, 81:20:00, 82:20:15, 83:20:30, 84:20:45, 85:21:00, 86:21:15, 87:21:30, 88:21:45, 89:22:00, 90:22:15, 91:22:30, 92:22:45, 93:23:00, 94:23:15, 95:23:30, 96:23:45

[44] [activity\\_17: From <font color="maroon">%activity\\_16%</font>, what did you do?](#)

Categories: 1:Selling products and/or services in a shop, for self or household member, 2:Selling products and/or services door-to-door, for self or household member, 3:Sourcing and transporting products for trade e.g. day-old chicks, semen straws, feed, drugs etc, 4:Value -addition to the traded product e.g. processing meat, caring for the incubation process, grading etc, 5:Cleaning equipment and premises, 6:Communicating with suppliers, 7:Business group meetings (SACCO or ROSCA meetings, etc), 8:Business or self-employment activities (other than the agri-enterprise) for self or household member, 9:Work as employed, 10:Going to the bank, 11:Bookkeeping, 18:Sleeping and resting, 13:Eating and drinking, 14:Personal care, 15:School (incl. homework), 16:Cooking, 17:Domestic work (incl. fetching water, fuel), 12:Caring for children, 19:Caring for adults (sick, elderly), 20:Commuting (to/from work or school), 21:Traveling (not for work or school), 22:Exercising, 23:Social activities and hobbies, 24:Religious activities, 25:Weaving / sewing / textile care, 26:Farming, crop cultivation,, 27:Livestock raising (cattle, poultry, sheep, etc.), 28:Shopping / getting service (incl. health services), 29:Horticulture

[45] [endtime\\_17: Until what time? <font color="maroon">\(%hrs\\_17% hours %min\\_17% minutes\)</font>](#)

Categories: 1:00:00, 2:00:15, 3:00:30, 4:00:45, 5:01:00, 6:01:15, 7:01:30, 8:01:45, 9:02:00, 10:02:15, 11:02:30, 12:02:45, 13:03:00, 14:03:15, 15:03:30, 16:03:45, 17:04:00, 18:04:15, 19:04:30, 20:04:45, 21:05:00, 22:05:15, 23:05:30, 24:05:45, 25:06:00, 26:06:15, 27:06:30, 28:06:45, 29:07:00, 30:07:15, 31:07:30, 32:07:45, 33:08:00, 34:08:15, 35:08:30, 36:08:45, 37:09:00, 38:09:15, 39:09:30, 40:09:45, 41:10:00, 42:10:15, 43:10:30, 44:10:45, 45:11:00, 46:11:15, 47:11:30, 48:11:45, 49:12:00, 50:12:15, 51:12:30, 52:12:45, 53:13:00, 54:13:15, 55:13:30, 56:13:45, 57:14:00, 58:14:15, 59:14:30, 60:14:45, 61:15:00, 62:15:15, 63:15:30, 64:15:45, 65:16:00, 66:16:15, 67:16:30, 68:16:45, 69:17:00, 70:17:15, 71:17:30, 72:17:45, 73:18:00, 74:18:15, 75:18:30, 76:18:45, 77:19:00, 78:19:15, 79:19:30, 80:19:45, 81:20:00, 82:20:15, 83:20:30, 84:20:45, 85:21:00, 86:21:15, 87:21:30, 88:21:45, 89:22:00, 90:22:15, 91:22:30, 92:22:45, 93:23:00, 94:23:15, 95:23:30, 96:23:45

[46] [activity\\_18: From <font color="maroon">%activity\\_17%</font>, what did you do?](#)

Categories: 1:Selling products and/or services in a shop, for self or household member, 2:Selling products and/or services door-to-door, for self or household member, 3:Sourcing and transporting products for trade e.g. day-old chicks, semen straws, feed, drugs etc, 4:Value -addition to the traded product e.g. processing meat, caring for the incubation process, grading etc, 5:Cleaning equipment and premises, 6:Communicating with suppliers, 7:Business group meetings (SACCO or ROSCA meetings, etc), 8:Business or self-employment activities (other than the agri-enterprise) for self or household member, 9:Work as employed, 10:Going to the bank, 11:Bookkeeping, 18:Sleeping and resting, 13:Eating and drinking, 14:Personal care, 15:School (incl. homework), 16:Cooking, 17:Domestic work (incl. fetching water, fuel), 12:Caring for children, 19:Caring for adults (sick, elderly), 20:Commuting (to/from work or school), 21:Traveling (not for work or school), 22:Exercising, 23:Social activities and hobbies, 24:Religious activities, 25:Weaving / sewing / textile care, 26:Farming, crop cultivation,, 27:Livestock raising (cattle, poultry, sheep, etc.), 28:Shopping / getting service (incl. health services), 29:Horticulture

[47] [endtime\\_18: Until what time? <font color="maroon">\(%hrs\\_18% hours %min\\_18% minutes\)</font>](#)

Categories: 1:00:00, 2:00:15, 3:00:30, 4:00:45, 5:01:00, 6:01:15, 7:01:30, 8:01:45, 9:02:00, 10:02:15, 11:02:30, 12:02:45, 13:03:00, 14:03:15, 15:03:30, 16:03:45, 17:04:00, 18:04:15, 19:04:30, 20:04:45, 21:05:00, 22:05:15, 23:05:30, 24:05:45, 25:06:00, 26:06:15, 27:06:30, 28:06:45, 29:07:00, 30:07:15, 31:07:30, 32:07:45, 33:08:00, 34:08:15, 35:08:30, 36:08:45, 37:09:00, 38:09:15, 39:09:30, 40:09:45, 41:10:00, 42:10:15, 43:10:30, 44:10:45, 45:11:00, 46:11:15, 47:11:30, 48:11:45, 49:12:00, 50:12:15, 51:12:30, 52:12:45, 53:13:00, 54:13:15, 55:13:30, 56:13:45, 57:14:00, 58:14:15, 59:14:30, 60:14:45, 61:15:00, 62:15:15, 63:15:30, 64:15:45, 65:16:00, 66:16:15, 67:16:30, 68:16:45, 69:17:00, 70:17:15, 71:17:30, 72:17:45, 73:18:00, 74:18:15, 75:18:30, 76:18:45, 77:19:00, 78:19:15, 79:19:30, 80:19:45, 81:20:00, 82:20:15, 83:20:30, 84:20:45, 85:21:00, 86:21:15, 87:21:30, 88:21:45, 89:22:00, 90:22:15, 91:22:30, 92:22:45, 93:23:00, 94:23:15, 95:23:30, 96:23:45

[48] [activity\\_19: From <font color="maroon">%activity\\_18%</font>, what did you do?](#)

Categories: 1:Selling products and/or services in a shop, for self or household member, 2:Selling products and/or services door-to-door, for self or household member, 3:Sourcing and transporting products for trade e.g. day-old chicks, semen straws, feed, drugs etc, 4:Value -addition to the traded product e.g. processing meat, caring for the incubation process, grading etc, 5:Cleaning equipment and premises, 6:Communicating with suppliers, 7:Business group meetings (SACCO or ROSCA meetings, etc), 8:Business or self-employment activities (other than the agri-enterprise) for self or household member, 9:Work as employed, 10:Going to the bank, 11:Bookkeeping, 18:Sleeping and resting, 13:Eating and drinking, 14:Personal care, 15:School (incl. homework), 16:Cooking, 17:Domestic work (incl. fetching water, fuel), 12:Caring for children, 19:Caring for adults (sick, elderly), 20:Commuting (to/from work or school), 21:Traveling (not for work or school), 22:Exercising, 23:Social activities and hobbies, 24:Religious activities, 25:Weaving / sewing / textile care,

26:Farming, crop cultivation,, 27:Livestock raising (cattle, poultry, sheep, etc.), 28:Shopping / getting service (incl. health services), 29:Horticulture

[49] [endtime\\_19: Until what time? <font color="maroon">\(%hrs\\_19% hours %min\\_19% minutes\)</font>](#)

Categories: 1:00:00, 2:00:15, 3:00:30, 4:00:45, 5:01:00, 6:01:15, 7:01:30, 8:01:45, 9:02:00, 10:02:15, 11:02:30, 12:02:45, 13:03:00, 14:03:15, 15:03:30, 16:03:45, 17:04:00, 18:04:15, 19:04:30, 20:04:45, 21:05:00, 22:05:15, 23:05:30, 24:05:45, 25:06:00, 26:06:15, 27:06:30, 28:06:45, 29:07:00, 30:07:15, 31:07:30, 32:07:45, 33:08:00, 34:08:15, 35:08:30, 36:08:45, 37:09:00, 38:09:15, 39:09:30, 40:09:45, 41:10:00, 42:10:15, 43:10:30, 44:10:45, 45:11:00, 46:11:15, 47:11:30, 48:11:45, 49:12:00, 50:12:15, 51:12:30, 52:12:45, 53:13:00, 54:13:15, 55:13:30, 56:13:45, 57:14:00, 58:14:15, 59:14:30, 60:14:45, 61:15:00, 62:15:15, 63:15:30, 64:15:45, 65:16:00, 66:16:15, 67:16:30, 68:16:45, 69:17:00, 70:17:15, 71:17:30, 72:17:45, 73:18:00, 74:18:15, 75:18:30, 76:18:45, 77:19:00, 78:19:15, 79:19:30, 80:19:45, 81:20:00, 82:20:15, 83:20:30, 84:20:45, 85:21:00, 86:21:15, 87:21:30, 88:21:45, 89:22:00, 90:22:15, 91:22:30, 92:22:45, 93:23:00, 94:23:15, 95:23:30, 96:23:45

[50] [activity\\_20: From <font color="maroon">%activity\\_19%</font>, what did you do?](#)

Categories: 1:Selling products and/or services in a shop, for self or household member, 2:Selling products and/or services door-to-door, for self or household member, 3:Sourcing and transporting products for trade e.g. day-old chicks, semen straws, feed, drugs etc, 4:Value -addition to the traded product e.g. processing meat, caring for the incubation process, grading etc, 5:Cleaning equipment and premises, 6:Communicating with suppliers, 7:Business group meetings (SACCO or ROSCA meetings, etc), 8:Business or self-employment activities (other than the agri-enterprise) for self or household member, 9:Work as employed, 10:Going to the bank, 11:Bookkeeping, 18:Sleeping and resting, 13:Eating and drinking, 14:Personal care, 15:School (incl. homework), 16:Cooking, 17:Domestic work (incl. fetching water, fuel), 12:Caring for children, 19:Caring for adults (sick, elderly), 20:Commuting (to/from work or school), 21:Traveling (not for work or school), 22:Exercising, 23:Social activities and hobbies, 24:Religious activities, 25:Weaving / sewing / textile care, 26:Farming, crop cultivation,, 27:Livestock raising (cattle, poultry, sheep, etc.), 28:Shopping / getting service (incl. health services), 29:Horticulture

[51] [endtime\\_20: Until what time? <font color="maroon">\(%hrs\\_20% hours %min\\_20% minutes\)</font>](#)

Categories: 1:00:00, 2:00:15, 3:00:30, 4:00:45, 5:01:00, 6:01:15, 7:01:30, 8:01:45, 9:02:00, 10:02:15, 11:02:30, 12:02:45, 13:03:00, 14:03:15, 15:03:30, 16:03:45, 17:04:00, 18:04:15, 19:04:30, 20:04:45, 21:05:00, 22:05:15, 23:05:30, 24:05:45, 25:06:00, 26:06:15, 27:06:30, 28:06:45, 29:07:00, 30:07:15, 31:07:30, 32:07:45, 33:08:00, 34:08:15, 35:08:30, 36:08:45, 37:09:00, 38:09:15, 39:09:30, 40:09:45, 41:10:00, 42:10:15, 43:10:30, 44:10:45, 45:11:00, 46:11:15, 47:11:30, 48:11:45, 49:12:00, 50:12:15, 51:12:30, 52:12:45, 53:13:00, 54:13:15, 55:13:30, 56:13:45, 57:14:00, 58:14:15, 59:14:30, 60:14:45, 61:15:00, 62:15:15, 63:15:30, 64:15:45, 65:16:00, 66:16:15, 67:16:30, 68:16:45, 69:17:00, 70:17:15, 71:17:30, 72:17:45, 73:18:00, 74:18:15, 75:18:30, 76:18:45, 77:19:00, 78:19:15, 79:19:30, 80:19:45, 81:20:00, 82:20:15, 83:20:30, 84:20:45, 85:21:00, 86:21:15, 87:21:30, 88:21:45, 89:22:00, 90:22:15, 91:22:30, 92:22:45, 93:23:00, 94:23:15, 95:23:30, 96:23:45

[52] [activity\\_21: From <font color="maroon">%activity\\_20%</font>, what did you do?](#)

Categories: 1:Selling products and/or services in a shop, for self or household member, 2:Selling products and/or services door-to-door, for self or household member, 3:Sourcing and transporting products for trade e.g. day-old chicks, semen straws, feed, drugs etc, 4:Value -addition to the traded product e.g. processing meat, caring for the incubation process, grading etc, 5:Cleaning equipment and premises, 6:Communicating with suppliers, 7:Business group meetings (SACCO or ROSCA meetings, etc), 8:Business or self-employment activities (other than the agri-enterprise) for self or household member, 9:Work as employed, 10:Going to the bank, 11:Bookkeeping, 18:Sleeping and resting, 13:Eating and drinking, 14:Personal care, 15:School (incl. homework), 16:Cooking, 17:Domestic work (incl. fetching water, fuel), 12:Caring for children, 19:Caring for adults (sick, elderly), 20:Commuting (to/from work or school), 21:Traveling (not for work or school), 22:Exercising, 23:Social activities and hobbies, 24:Religious activities, 25:Weaving / sewing / textile care, 26:Farming, crop cultivation,, 27:Livestock raising (cattle, poultry, sheep, etc.), 28:Shopping / getting service (incl. health services), 29:Horticulture

[53] [endtime\\_21: Until what time? <font color="maroon">\(%hrs\\_21% hours %min\\_21% minutes\)</font>](#)

Categories: 1:00:00, 2:00:15, 3:00:30, 4:00:45, 5:01:00, 6:01:15, 7:01:30, 8:01:45, 9:02:00, 10:02:15, 11:02:30, 12:02:45, 13:03:00, 14:03:15, 15:03:30, 16:03:45, 17:04:00, 18:04:15, 19:04:30, 20:04:45, 21:05:00, 22:05:15, 23:05:30, 24:05:45, 25:06:00, 26:06:15, 27:06:30, 28:06:45, 29:07:00, 30:07:15, 31:07:30, 32:07:45, 33:08:00, 34:08:15, 35:08:30, 36:08:45, 37:09:00, 38:09:15, 39:09:30, 40:09:45, 41:10:00, 42:10:15, 43:10:30, 44:10:45, 45:11:00, 46:11:15, 47:11:30, 48:11:45, 49:12:00, 50:12:15, 51:12:30, 52:12:45, 53:13:00, 54:13:15, 55:13:30, 56:13:45, 57:14:00, 58:14:15, 59:14:30, 60:14:45, 61:15:00, 62:15:15, 63:15:30, 64:15:45, 65:16:00, 66:16:15, 67:16:30, 68:16:45, 69:17:00, 70:17:15, 71:17:30, 72:17:45, 73:18:00, 74:18:15, 75:18:30, 76:18:45, 77:19:00, 78:19:15, 79:19:30, 80:19:45, 81:20:00, 82:20:15, 83:20:30, 84:20:45, 85:21:00, 86:21:15, 87:21:30, 88:21:45, 89:22:00, 90:22:15, 91:22:30, 92:22:45, 93:23:00, 94:23:15, 95:23:30, 96:23:45

[54] [activity\\_22: From <font color="maroon">%activity\\_21%</font>, what did you do?](#)

Categories: 1:Selling products and/or services in a shop, for self or household member, 2:Selling products and/or services door-to-door, for self or household member, 3:Sourcing and transporting products for trade e.g. day-old chicks, semen straws, feed, drugs etc, 4:Value -addition to the traded product e.g. processing meat, caring for the incubation process, grading etc, 5:Cleaning equipment and premises, 6:Communicating with suppliers, 7:Business group meetings (SACCO or ROSCA meetings, etc), 8:Business or self-employment activities (other than the agri-enterprise) for self or household member, 9:Work as employed, 10:Going to the bank, 11:Bookkeeping, 18:Sleeping and resting, 13:Eating and drinking, 14:Personal care, 15:School (incl. homework), 16:Cooking, 17:Domestic work (incl. fetching water, fuel), 12:Caring for children, 19:Caring for adults (sick, elderly), 20:Commuting (to/from work or school), 21:Traveling (not for work or school), 22:Exercising, 23:Social activities and hobbies, 24:Religious activities, 25:Weaving / sewing / textile care,

26:Farming, crop cultivation,, 27:Livestock raising (cattle, poultry, sheep, etc.), 28:Shopping / getting service (incl. health services), 29:Horticulture

[55] [endtime\\_22: Until what time? <font color="maroon">\(%hrs\\_22% hours %min\\_22% minutes\)</font>](#)

Categories: 1:00:00, 2:00:15, 3:00:30, 4:00:45, 5:01:00, 6:01:15, 7:01:30, 8:01:45, 9:02:00, 10:02:15, 11:02:30, 12:02:45, 13:03:00, 14:03:15, 15:03:30, 16:03:45, 17:04:00, 18:04:15, 19:04:30, 20:04:45, 21:05:00, 22:05:15, 23:05:30, 24:05:45, 25:06:00, 26:06:15, 27:06:30, 28:06:45, 29:07:00, 30:07:15, 31:07:30, 32:07:45, 33:08:00, 34:08:15, 35:08:30, 36:08:45, 37:09:00, 38:09:15, 39:09:30, 40:09:45, 41:10:00, 42:10:15, 43:10:30, 44:10:45, 45:11:00, 46:11:15, 47:11:30, 48:11:45, 49:12:00, 50:12:15, 51:12:30, 52:12:45, 53:13:00, 54:13:15, 55:13:30, 56:13:45, 57:14:00, 58:14:15, 59:14:30, 60:14:45, 61:15:00, 62:15:15, 63:15:30, 64:15:45, 65:16:00, 66:16:15, 67:16:30, 68:16:45, 69:17:00, 70:17:15, 71:17:30, 72:17:45, 73:18:00, 74:18:15, 75:18:30, 76:18:45, 77:19:00, 78:19:15, 79:19:30, 80:19:45, 81:20:00, 82:20:15, 83:20:30, 84:20:45, 85:21:00, 86:21:15, 87:21:30, 88:21:45, 89:22:00, 90:22:15, 91:22:30, 92:22:45, 93:23:00, 94:23:15, 95:23:30, 96:23:45

[56] [activity\\_23: From <font color="maroon">%activity\\_22%</font>, what did you do?](#)

Categories: 1:Selling products and/or services in a shop, for self or household member, 2:Selling products and/or services door-to-door, for self or household member, 3:Sourcing and transporting products for trade e.g. day-old chicks, semen straws, feed, drugs etc, 4:Value -addition to the traded product e.g. processing meat, caring for the incubation process, grading etc, 5:Cleaning equipment and premises, 6:Communicating with suppliers, 7:Business group meetings (SACCO or ROSCA meetings, etc), 8:Business or self-employment activities (other than the agri-enterprise) for self or household member, 9:Work as employed, 10:Going to the bank, 11:Bookkeeping, 18:Sleeping and resting, 13:Eating and drinking, 14:Personal care, 15:School (incl. homework), 16:Cooking, 17:Domestic work (incl. fetching water, fuel), 12:Caring for children, 19:Caring for adults (sick, elderly), 20:Commuting (to/from work or school), 21:Traveling (not for work or school), 22:Exercising, 23:Social activities and hobbies, 24:Religious activities, 25:Weaving / sewing / textile care, 26:Farming, crop cultivation,, 27:Livestock raising (cattle, poultry, sheep, etc.), 28:Shopping / getting service (incl. health services), 29:Horticulture

[57] [endtime\\_23: Until what time? <font color="maroon">\(%hrs\\_23% hours %min\\_23% minutes\)</font>](#)

Categories: 1:00:00, 2:00:15, 3:00:30, 4:00:45, 5:01:00, 6:01:15, 7:01:30, 8:01:45, 9:02:00, 10:02:15, 11:02:30, 12:02:45, 13:03:00, 14:03:15, 15:03:30, 16:03:45, 17:04:00, 18:04:15, 19:04:30, 20:04:45, 21:05:00, 22:05:15, 23:05:30, 24:05:45, 25:06:00, 26:06:15, 27:06:30, 28:06:45, 29:07:00, 30:07:15, 31:07:30, 32:07:45, 33:08:00, 34:08:15, 35:08:30, 36:08:45, 37:09:00, 38:09:15, 39:09:30, 40:09:45, 41:10:00, 42:10:15, 43:10:30, 44:10:45, 45:11:00, 46:11:15, 47:11:30, 48:11:45, 49:12:00, 50:12:15, 51:12:30, 52:12:45, 53:13:00, 54:13:15, 55:13:30, 56:13:45, 57:14:00, 58:14:15, 59:14:30, 60:14:45, 61:15:00, 62:15:15, 63:15:30, 64:15:45, 65:16:00, 66:16:15, 67:16:30, 68:16:45, 69:17:00, 70:17:15, 71:17:30, 72:17:45, 73:18:00, 74:18:15, 75:18:30, 76:18:45, 77:19:00, 78:19:15, 79:19:30, 80:19:45, 81:20:00, 82:20:15, 83:20:30, 84:20:45, 85:21:00, 86:21:15, 87:21:30, 88:21:45, 89:22:00, 90:22:15, 91:22:30, 92:22:45, 93:23:00, 94:23:15, 95:23:30, 96:23:45

[58] [activity\\_24: From <font color="maroon">%activity\\_23%</font>, what did you do?](#)

Categories: 1:Selling products and/or services in a shop, for self or household member, 2:Selling products and/or services door-to-door, for self or household member, 3:Sourcing and transporting products for trade e.g. day-old chicks, semen straws, feed, drugs etc, 4:Value -addition to the traded product e.g. processing meat, caring for the incubation process, grading etc, 5:Cleaning equipment and premises, 6:Communicating with suppliers, 7:Business group meetings (SACCO or ROSCA meetings, etc), 8:Business or self-employment activities (other than the agri-enterprise) for self or household member, 9:Work as employed, 10:Going to the bank, 11:Bookkeeping, 18:Sleeping and resting, 13:Eating and drinking, 14:Personal care, 15:School (incl. homework), 16:Cooking, 17:Domestic work (incl. fetching water, fuel), 12:Caring for children, 19:Caring for adults (sick, elderly), 20:Commuting (to/from work or school), 21:Traveling (not for work or school), 22:Exercising, 23:Social activities and hobbies, 24:Religious activities, 25:Weaving / sewing / textile care, 26:Farming, crop cultivation,, 27:Livestock raising (cattle, poultry, sheep, etc.), 28:Shopping / getting service (incl. health services), 29:Horticulture

[59] [endtime\\_24: Until what time? <font color="maroon">\(%hrs\\_24% hours %min\\_24% minutes\)</font>](#)

Categories: 1:00:00, 2:00:15, 3:00:30, 4:00:45, 5:01:00, 6:01:15, 7:01:30, 8:01:45, 9:02:00, 10:02:15, 11:02:30, 12:02:45, 13:03:00, 14:03:15, 15:03:30, 16:03:45, 17:04:00, 18:04:15, 19:04:30, 20:04:45, 21:05:00, 22:05:15, 23:05:30, 24:05:45, 25:06:00, 26:06:15, 27:06:30, 28:06:45, 29:07:00, 30:07:15, 31:07:30, 32:07:45, 33:08:00, 34:08:15, 35:08:30, 36:08:45, 37:09:00, 38:09:15, 39:09:30, 40:09:45, 41:10:00, 42:10:15, 43:10:30, 44:10:45, 45:11:00, 46:11:15, 47:11:30, 48:11:45, 49:12:00, 50:12:15, 51:12:30, 52:12:45, 53:13:00, 54:13:15, 55:13:30, 56:13:45, 57:14:00, 58:14:15, 59:14:30, 60:14:45, 61:15:00, 62:15:15, 63:15:30, 64:15:45, 65:16:00, 66:16:15, 67:16:30, 68:16:45, 69:17:00, 70:17:15, 71:17:30, 72:17:45, 73:18:00, 74:18:15, 75:18:30, 76:18:45, 77:19:00, 78:19:15, 79:19:30, 80:19:45, 81:20:00, 82:20:15, 83:20:30, 84:20:45, 85:21:00, 86:21:15, 87:21:30, 88:21:45, 89:22:00, 90:22:15, 91:22:30, 92:22:45, 93:23:00, 94:23:15, 95:23:30, 96:23:45

[60] [activity\\_25: From <font color="maroon">%activity\\_24%</font>, what did you do?](#)

Categories: 1:Selling products and/or services in a shop, for self or household member, 2:Selling products and/or services door-to-door, for self or household member, 3:Sourcing and transporting products for trade e.g. day-old chicks, semen straws, feed, drugs etc, 4:Value -addition to the traded product e.g. processing meat, caring for the incubation process, grading etc, 5:Cleaning equipment and premises, 6:Communicating with suppliers, 7:Business group meetings (SACCO or ROSCA meetings, etc), 8:Business or self-employment activities (other than the agri-enterprise) for self or household member, 9:Work as employed, 10:Going to the bank, 11:Bookkeeping, 18:Sleeping and resting, 13:Eating and drinking, 14:Personal care, 15:School (incl. homework), 16:Cooking, 17:Domestic work (incl. fetching water, fuel), 12:Caring for children, 19:Caring for adults (sick, elderly), 20:Commuting (to/from work or school), 21:Traveling (not for work or school), 22:Exercising, 23:Social activities and hobbies, 24:Religious activities, 25:Weaving / sewing / textile care,

26:Farming, crop cultivation,, 27:Livestock raising (cattle, poultry, sheep, etc.), 28:Shopping / getting service (incl. health services), 29:Horticulture

[61] [endtime\\_25: Until what time? <font color="maroon">\(%hrs\\_25% hours %min\\_25% minutes\)</font>](#)

Categories: 1:00:00, 2:00:15, 3:00:30, 4:00:45, 5:01:00, 6:01:15, 7:01:30, 8:01:45, 9:02:00, 10:02:15, 11:02:30, 12:02:45, 13:03:00, 14:03:15, 15:03:30, 16:03:45, 17:04:00, 18:04:15, 19:04:30, 20:04:45, 21:05:00, 22:05:15, 23:05:30, 24:05:45, 25:06:00, 26:06:15, 27:06:30, 28:06:45, 29:07:00, 30:07:15, 31:07:30, 32:07:45, 33:08:00, 34:08:15, 35:08:30, 36:08:45, 37:09:00, 38:09:15, 39:09:30, 40:09:45, 41:10:00, 42:10:15, 43:10:30, 44:10:45, 45:11:00, 46:11:15, 47:11:30, 48:11:45, 49:12:00, 50:12:15, 51:12:30, 52:12:45, 53:13:00, 54:13:15, 55:13:30, 56:13:45, 57:14:00, 58:14:15, 59:14:30, 60:14:45, 61:15:00, 62:15:15, 63:15:30, 64:15:45, 65:16:00, 66:16:15, 67:16:30, 68:16:45, 69:17:00, 70:17:15, 71:17:30, 72:17:45, 73:18:00, 74:18:15, 75:18:30, 76:18:45, 77:19:00, 78:19:15, 79:19:30, 80:19:45, 81:20:00, 82:20:15, 83:20:30, 84:20:45, 85:21:00, 86:21:15, 87:21:30, 88:21:45, 89:22:00, 90:22:15, 91:22:30, 92:22:45, 93:23:00, 94:23:15, 95:23:30, 96:23:45

[62] [activity\\_26: From <font color="maroon">%activity\\_25%</font>, what did you do?](#)

Categories: 1:Selling products and/or services in a shop, for self or household member, 2:Selling products and/or services door-to-door, for self or household member, 3:Sourcing and transporting products for trade e.g. day-old chicks, semen straws, feed, drugs etc, 4:Value -addition to the traded product e.g. processing meat, caring for the incubation process, grading etc, 5:Cleaning equipment and premises, 6:Communicating with suppliers, 7:Business group meetings (SACCO or ROSCA meetings, etc), 8:Business or self-employment activities (other than the agri-enterprise) for self or household member, 9:Work as employed, 10:Going to the bank, 11:Bookkeeping, 18:Sleeping and resting, 13:Eating and drinking, 14:Personal care, 15:School (incl. homework), 16:Cooking, 17:Domestic work (incl. fetching water, fuel), 12:Caring for children, 19:Caring for adults (sick, elderly), 20:Commuting (to/from work or school), 21:Traveling (not for work or school), 22:Exercising, 23:Social activities and hobbies, 24:Religious activities, 25:Weaving / sewing / textile care, 26:Farming, crop cultivation,, 27:Livestock raising (cattle, poultry, sheep, etc.), 28:Shopping / getting service (incl. health services), 29:Horticulture

[63] [endtime\\_26: Until what time? <font color="maroon">\(%hrs\\_26% hours %min\\_26% minutes\)</font>](#)

Categories: 1:00:00, 2:00:15, 3:00:30, 4:00:45, 5:01:00, 6:01:15, 7:01:30, 8:01:45, 9:02:00, 10:02:15, 11:02:30, 12:02:45, 13:03:00, 14:03:15, 15:03:30, 16:03:45, 17:04:00, 18:04:15, 19:04:30, 20:04:45, 21:05:00, 22:05:15, 23:05:30, 24:05:45, 25:06:00, 26:06:15, 27:06:30, 28:06:45, 29:07:00, 30:07:15, 31:07:30, 32:07:45, 33:08:00, 34:08:15, 35:08:30, 36:08:45, 37:09:00, 38:09:15, 39:09:30, 40:09:45, 41:10:00, 42:10:15, 43:10:30, 44:10:45, 45:11:00, 46:11:15, 47:11:30, 48:11:45, 49:12:00, 50:12:15, 51:12:30, 52:12:45, 53:13:00, 54:13:15, 55:13:30, 56:13:45, 57:14:00, 58:14:15, 59:14:30, 60:14:45, 61:15:00, 62:15:15, 63:15:30, 64:15:45, 65:16:00, 66:16:15, 67:16:30, 68:16:45, 69:17:00, 70:17:15, 71:17:30, 72:17:45, 73:18:00, 74:18:15, 75:18:30, 76:18:45, 77:19:00, 78:19:15, 79:19:30, 80:19:45, 81:20:00, 82:20:15, 83:20:30, 84:20:45, 85:21:00, 86:21:15, 87:21:30, 88:21:45, 89:22:00, 90:22:15, 91:22:30, 92:22:45, 93:23:00, 94:23:15, 95:23:30, 96:23:45

[64] [activity\\_27: From <font color="maroon">%activity\\_26%</font>, what did you do?](#)

Categories: 1:Selling products and/or services in a shop, for self or household member, 2:Selling products and/or services door-to-door, for self or household member, 3:Sourcing and transporting products for trade e.g. day-old chicks, semen straws, feed, drugs etc, 4:Value -addition to the traded product e.g. processing meat, caring for the incubation process, grading etc, 5:Cleaning equipment and premises, 6:Communicating with suppliers, 7:Business group meetings (SACCO or ROSCA meetings, etc), 8:Business or self-employment activities (other than the agri-enterprise) for self or household member, 9:Work as employed, 10:Going to the bank, 11:Bookkeeping, 18:Sleeping and resting, 13:Eating and drinking, 14:Personal care, 15:School (incl. homework), 16:Cooking, 17:Domestic work (incl. fetching water, fuel), 12:Caring for children, 19:Caring for adults (sick, elderly), 20:Commuting (to/from work or school), 21:Traveling (not for work or school), 22:Exercising, 23:Social activities and hobbies, 24:Religious activities, 25:Weaving / sewing / textile care, 26:Farming, crop cultivation,, 27:Livestock raising (cattle, poultry, sheep, etc.), 28:Shopping / getting service (incl. health services), 29:Horticulture

[65] [endtime\\_27: Until what time? <font color="maroon">\(%hrs\\_27% hours %min\\_27% minutes\)</font>](#)

Categories: 1:00:00, 2:00:15, 3:00:30, 4:00:45, 5:01:00, 6:01:15, 7:01:30, 8:01:45, 9:02:00, 10:02:15, 11:02:30, 12:02:45, 13:03:00, 14:03:15, 15:03:30, 16:03:45, 17:04:00, 18:04:15, 19:04:30, 20:04:45, 21:05:00, 22:05:15, 23:05:30, 24:05:45, 25:06:00, 26:06:15, 27:06:30, 28:06:45, 29:07:00, 30:07:15, 31:07:30, 32:07:45, 33:08:00, 34:08:15, 35:08:30, 36:08:45, 37:09:00, 38:09:15, 39:09:30, 40:09:45, 41:10:00, 42:10:15, 43:10:30, 44:10:45, 45:11:00, 46:11:15, 47:11:30, 48:11:45, 49:12:00, 50:12:15, 51:12:30, 52:12:45, 53:13:00, 54:13:15, 55:13:30, 56:13:45, 57:14:00, 58:14:15, 59:14:30, 60:14:45, 61:15:00, 62:15:15, 63:15:30, 64:15:45, 65:16:00, 66:16:15, 67:16:30, 68:16:45, 69:17:00, 70:17:15, 71:17:30, 72:17:45, 73:18:00, 74:18:15, 75:18:30, 76:18:45, 77:19:00, 78:19:15, 79:19:30, 80:19:45, 81:20:00, 82:20:15, 83:20:30, 84:20:45, 85:21:00, 86:21:15, 87:21:30, 88:21:45, 89:22:00, 90:22:15, 91:22:30, 92:22:45, 93:23:00, 94:23:15, 95:23:30, 96:23:45

[66] [activity\\_28: From <font color="maroon">%activity\\_27%</font>, what did you do?](#)

Categories: 1:Selling products and/or services in a shop, for self or household member, 2:Selling products and/or services door-to-door, for self or household member, 3:Sourcing and transporting products for trade e.g. day-old chicks, semen straws, feed, drugs etc, 4:Value -addition to the traded product e.g. processing meat, caring for the incubation process, grading etc, 5:Cleaning equipment and premises, 6:Communicating with suppliers, 7:Business group meetings (SACCO or ROSCA meetings, etc), 8:Business or self-employment activities (other than the agri-enterprise) for self or household member, 9:Work as employed, 10:Going to the bank, 11:Bookkeeping, 18:Sleeping and resting, 13:Eating and drinking, 14:Personal care, 15:School (incl. homework), 16:Cooking, 17:Domestic work (incl. fetching water, fuel), 12:Caring for children, 19:Caring for adults (sick, elderly), 20:Commuting (to/from work or school), 21:Traveling (not for work or school), 22:Exercising, 23:Social activities and hobbies, 24:Religious activities, 25:Weaving / sewing / textile care,

26:Farming, crop cultivation,, 27:Livestock raising (cattle, poultry, sheep, etc.), 28:Shopping / getting service (incl. health services), 29:Horticulture

[67] [endtime\\_28: Until what time? <font color="maroon">\(%hrs\\_28% hours %min\\_28% minutes\)</font>](#)

Categories: 1:00:00, 2:00:15, 3:00:30, 4:00:45, 5:01:00, 6:01:15, 7:01:30, 8:01:45, 9:02:00, 10:02:15, 11:02:30, 12:02:45, 13:03:00, 14:03:15, 15:03:30, 16:03:45, 17:04:00, 18:04:15, 19:04:30, 20:04:45, 21:05:00, 22:05:15, 23:05:30, 24:05:45, 25:06:00, 26:06:15, 27:06:30, 28:06:45, 29:07:00, 30:07:15, 31:07:30, 32:07:45, 33:08:00, 34:08:15, 35:08:30, 36:08:45, 37:09:00, 38:09:15, 39:09:30, 40:09:45, 41:10:00, 42:10:15, 43:10:30, 44:10:45, 45:11:00, 46:11:15, 47:11:30, 48:11:45, 49:12:00, 50:12:15, 51:12:30, 52:12:45, 53:13:00, 54:13:15, 55:13:30, 56:13:45, 57:14:00, 58:14:15, 59:14:30, 60:14:45, 61:15:00, 62:15:15, 63:15:30, 64:15:45, 65:16:00, 66:16:15, 67:16:30, 68:16:45, 69:17:00, 70:17:15, 71:17:30, 72:17:45, 73:18:00, 74:18:15, 75:18:30, 76:18:45, 77:19:00, 78:19:15, 79:19:30, 80:19:45, 81:20:00, 82:20:15, 83:20:30, 84:20:45, 85:21:00, 86:21:15, 87:21:30, 88:21:45, 89:22:00, 90:22:15, 91:22:30, 92:22:45, 93:23:00, 94:23:15, 95:23:30, 96:23:45

[68] [activity\\_29: From <font color="maroon">%activity\\_28%</font>, what did you do?](#)

Categories: 1:Selling products and/or services in a shop, for self or household member, 2:Selling products and/or services door-to-door, for self or household member, 3:Sourcing and transporting products for trade e.g. day-old chicks, semen straws, feed, drugs etc, 4:Value -addition to the traded product e.g. processing meat, caring for the incubation process, grading etc, 5:Cleaning equipment and premises, 6:Communicating with suppliers, 7:Business group meetings (SACCO or ROSCA meetings, etc), 8:Business or self-employment activities (other than the agri-enterprise) for self or household member, 9:Work as employed, 10:Going to the bank, 11:Bookkeeping, 18:Sleeping and resting, 13:Eating and drinking, 14:Personal care, 15:School (incl. homework), 16:Cooking, 17:Domestic work (incl. fetching water, fuel), 12:Caring for children, 19:Caring for adults (sick, elderly), 20:Commuting (to/from work or school), 21:Traveling (not for work or school), 22:Exercising, 23:Social activities and hobbies, 24:Religious activities, 25:Weaving / sewing / textile care, 26:Farming, crop cultivation,, 27:Livestock raising (cattle, poultry, sheep, etc.), 28:Shopping / getting service (incl. health services), 29:Horticulture

[69] [endtime\\_29: Until what time? <font color="maroon">\(%hrs\\_29% hours %min\\_29% minutes\)</font>](#)

Categories: 1:00:00, 2:00:15, 3:00:30, 4:00:45, 5:01:00, 6:01:15, 7:01:30, 8:01:45, 9:02:00, 10:02:15, 11:02:30, 12:02:45, 13:03:00, 14:03:15, 15:03:30, 16:03:45, 17:04:00, 18:04:15, 19:04:30, 20:04:45, 21:05:00, 22:05:15, 23:05:30, 24:05:45, 25:06:00, 26:06:15, 27:06:30, 28:06:45, 29:07:00, 30:07:15, 31:07:30, 32:07:45, 33:08:00, 34:08:15, 35:08:30, 36:08:45, 37:09:00, 38:09:15, 39:09:30, 40:09:45, 41:10:00, 42:10:15, 43:10:30, 44:10:45, 45:11:00, 46:11:15, 47:11:30, 48:11:45, 49:12:00, 50:12:15, 51:12:30, 52:12:45, 53:13:00, 54:13:15, 55:13:30, 56:13:45, 57:14:00, 58:14:15, 59:14:30, 60:14:45, 61:15:00, 62:15:15, 63:15:30, 64:15:45, 65:16:00, 66:16:15, 67:16:30, 68:16:45, 69:17:00, 70:17:15, 71:17:30, 72:17:45, 73:18:00, 74:18:15, 75:18:30, 76:18:45, 77:19:00, 78:19:15, 79:19:30, 80:19:45, 81:20:00, 82:20:15, 83:20:30, 84:20:45, 85:21:00, 86:21:15, 87:21:30, 88:21:45, 89:22:00, 90:22:15, 91:22:30, 92:22:45, 93:23:00, 94:23:15, 95:23:30, 96:23:45

[70] [activity\\_30: From <font color="maroon">%activity\\_29%</font>, what did you do?](#)

Categories: 1:Selling products and/or services in a shop, for self or household member, 2:Selling products and/or services door-to-door, for self or household member, 3:Sourcing and transporting products for trade e.g. day-old chicks, semen straws, feed, drugs etc, 4:Value -addition to the traded product e.g. processing meat, caring for the incubation process, grading etc, 5:Cleaning equipment and premises, 6:Communicating with suppliers, 7:Business group meetings (SACCO or ROSCA meetings, etc), 8:Business or self-employment activities (other than the agri-enterprise) for self or household member, 9:Work as employed, 10:Going to the bank, 11:Bookkeeping, 18:Sleeping and resting, 13:Eating and drinking, 14:Personal care, 15:School (incl. homework), 16:Cooking, 17:Domestic work (incl. fetching water, fuel), 12:Caring for children, 19:Caring for adults (sick, elderly), 20:Commuting (to/from work or school), 21:Traveling (not for work or school), 22:Exercising, 23:Social activities and hobbies, 24:Religious activities, 25:Weaving / sewing / textile care, 26:Farming, crop cultivation,, 27:Livestock raising (cattle, poultry, sheep, etc.), 28:Shopping / getting service (incl. health services), 29:Horticulture

[71] [endtime\\_30: Until what time? <font color="maroon">\(%hrs\\_30% hours %min\\_30% minutes\)</font>](#)

Categories: 1:00:00, 2:00:15, 3:00:30, 4:00:45, 5:01:00, 6:01:15, 7:01:30, 8:01:45, 9:02:00, 10:02:15, 11:02:30, 12:02:45, 13:03:00, 14:03:15, 15:03:30, 16:03:45, 17:04:00, 18:04:15, 19:04:30, 20:04:45, 21:05:00, 22:05:15, 23:05:30, 24:05:45, 25:06:00, 26:06:15, 27:06:30, 28:06:45, 29:07:00, 30:07:15, 31:07:30, 32:07:45, 33:08:00, 34:08:15, 35:08:30, 36:08:45, 37:09:00, 38:09:15, 39:09:30, 40:09:45, 41:10:00, 42:10:15, 43:10:30, 44:10:45, 45:11:00, 46:11:15, 47:11:30, 48:11:45, 49:12:00, 50:12:15, 51:12:30, 52:12:45, 53:13:00, 54:13:15, 55:13:30, 56:13:45, 57:14:00, 58:14:15, 59:14:30, 60:14:45, 61:15:00, 62:15:15, 63:15:30, 64:15:45, 65:16:00, 66:16:15, 67:16:30, 68:16:45, 69:17:00, 70:17:15, 71:17:30, 72:17:45, 73:18:00, 74:18:15, 75:18:30, 76:18:45, 77:19:00, 78:19:15, 79:19:30, 80:19:45, 81:20:00, 82:20:15, 83:20:30, 84:20:45, 85:21:00, 86:21:15, 87:21:30, 88:21:45, 89:22:00, 90:22:15, 91:22:30, 92:22:45, 93:23:00, 94:23:15, 95:23:30, 96:23:45

[72] [activity\\_31: From <font color="maroon">%activity\\_30%</font>, what did you do?](#)

Categories: 1:Selling products and/or services in a shop, for self or household member, 2:Selling products and/or services door-to-door, for self or household member, 3:Sourcing and transporting products for trade e.g. day-old chicks, semen straws, feed, drugs etc, 4:Value -addition to the traded product e.g. processing meat, caring for the incubation process, grading etc, 5:Cleaning equipment and premises, 6:Communicating with suppliers, 7:Business group meetings (SACCO or ROSCA meetings, etc), 8:Business or self-employment activities (other than the agri-enterprise) for self or household member, 9:Work as employed, 10:Going to the bank, 11:Bookkeeping, 18:Sleeping and resting, 13:Eating and drinking, 14:Personal care, 15:School (incl. homework), 16:Cooking, 17:Domestic work (incl. fetching water, fuel), 12:Caring for children, 19:Caring for adults (sick, elderly), 20:Commuting (to/from work or school), 21:Traveling (not for work or school), 22:Exercising, 23:Social activities and hobbies, 24:Religious activities, 25:Weaving / sewing / textile care,

26:Farming, crop cultivation,, 27:Livestock raising (cattle, poultry, sheep, etc.), 28:Shopping / getting service (incl. health services), 29:Horticulture

[73] [endtime\\_31: Until what time? <font color="maroon">\(%hrs\\_31% hours %min\\_31% minutes\)</font>](#)

Categories: 1:00:00, 2:00:15, 3:00:30, 4:00:45, 5:01:00, 6:01:15, 7:01:30, 8:01:45, 9:02:00, 10:02:15, 11:02:30, 12:02:45, 13:03:00, 14:03:15, 15:03:30, 16:03:45, 17:04:00, 18:04:15, 19:04:30, 20:04:45, 21:05:00, 22:05:15, 23:05:30, 24:05:45, 25:06:00, 26:06:15, 27:06:30, 28:06:45, 29:07:00, 30:07:15, 31:07:30, 32:07:45, 33:08:00, 34:08:15, 35:08:30, 36:08:45, 37:09:00, 38:09:15, 39:09:30, 40:09:45, 41:10:00, 42:10:15, 43:10:30, 44:10:45, 45:11:00, 46:11:15, 47:11:30, 48:11:45, 49:12:00, 50:12:15, 51:12:30, 52:12:45, 53:13:00, 54:13:15, 55:13:30, 56:13:45, 57:14:00, 58:14:15, 59:14:30, 60:14:45, 61:15:00, 62:15:15, 63:15:30, 64:15:45, 65:16:00, 66:16:15, 67:16:30, 68:16:45, 69:17:00, 70:17:15, 71:17:30, 72:17:45, 73:18:00, 74:18:15, 75:18:30, 76:18:45, 77:19:00, 78:19:15, 79:19:30, 80:19:45, 81:20:00, 82:20:15, 83:20:30, 84:20:45, 85:21:00, 86:21:15, 87:21:30, 88:21:45, 89:22:00, 90:22:15, 91:22:30, 92:22:45, 93:23:00, 94:23:15, 95:23:30, 96:23:45

[74] [activity\\_32: From <font color="maroon">%activity\\_31%</font>, what did you do?](#)

Categories: 1:Selling products and/or services in a shop, for self or household member, 2:Selling products and/or services door-to-door, for self or household member, 3:Sourcing and transporting products for trade e.g. day-old chicks, semen straws, feed, drugs etc, 4:Value -addition to the traded product e.g. processing meat, caring for the incubation process, grading etc, 5:Cleaning equipment and premises, 6:Communicating with suppliers, 7:Business group meetings (SACCO or ROSCA meetings, etc), 8:Business or self-employment activities (other than the agri-enterprise) for self or household member, 9:Work as employed, 10:Going to the bank, 11:Bookkeeping, 18:Sleeping and resting, 13:Eating and drinking, 14:Personal care, 15:School (incl. homework), 16:Cooking, 17:Domestic work (incl. fetching water, fuel), 12:Caring for children, 19:Caring for adults (sick, elderly), 20:Commuting (to/from work or school), 21:Traveling (not for work or school), 22:Exercising, 23:Social activities and hobbies, 24:Religious activities, 25:Weaving / sewing / textile care, 26:Farming, crop cultivation,, 27:Livestock raising (cattle, poultry, sheep, etc.), 28:Shopping / getting service (incl. health services), 29:Horticulture

[75] [endtime\\_32: Until what time? <font color="maroon">\(%hrs\\_32% hours %min\\_32% minutes\)</font>](#)

Categories: 1:00:00, 2:00:15, 3:00:30, 4:00:45, 5:01:00, 6:01:15, 7:01:30, 8:01:45, 9:02:00, 10:02:15, 11:02:30, 12:02:45, 13:03:00, 14:03:15, 15:03:30, 16:03:45, 17:04:00, 18:04:15, 19:04:30, 20:04:45, 21:05:00, 22:05:15, 23:05:30, 24:05:45, 25:06:00, 26:06:15, 27:06:30, 28:06:45, 29:07:00, 30:07:15, 31:07:30, 32:07:45, 33:08:00, 34:08:15, 35:08:30, 36:08:45, 37:09:00, 38:09:15, 39:09:30, 40:09:45, 41:10:00, 42:10:15, 43:10:30, 44:10:45, 45:11:00, 46:11:15, 47:11:30, 48:11:45, 49:12:00, 50:12:15, 51:12:30, 52:12:45, 53:13:00, 54:13:15, 55:13:30, 56:13:45, 57:14:00, 58:14:15, 59:14:30, 60:14:45, 61:15:00, 62:15:15, 63:15:30, 64:15:45, 65:16:00, 66:16:15, 67:16:30, 68:16:45, 69:17:00, 70:17:15, 71:17:30, 72:17:45, 73:18:00, 74:18:15, 75:18:30, 76:18:45, 77:19:00, 78:19:15, 79:19:30, 80:19:45, 81:20:00, 82:20:15, 83:20:30, 84:20:45, 85:21:00, 86:21:15, 87:21:30, 88:21:45, 89:22:00, 90:22:15, 91:22:30, 92:22:45, 93:23:00, 94:23:15, 95:23:30, 96:23:45

[76] [activity\\_33: From <font color="maroon">%activity\\_32%</font>, what did you do?](#)

Categories: 1:Selling products and/or services in a shop, for self or household member, 2:Selling products and/or services door-to-door, for self or household member, 3:Sourcing and transporting products for trade e.g. day-old chicks, semen straws, feed, drugs etc, 4:Value -addition to the traded product e.g. processing meat, caring for the incubation process, grading etc, 5:Cleaning equipment and premises, 6:Communicating with suppliers, 7:Business group meetings (SACCO or ROSCA meetings, etc), 8:Business or self-employment activities (other than the agri-enterprise) for self or household member, 9:Work as employed, 10:Going to the bank, 11:Bookkeeping, 18:Sleeping and resting, 13:Eating and drinking, 14:Personal care, 15:School (incl. homework), 16:Cooking, 17:Domestic work (incl. fetching water, fuel), 12:Caring for children, 19:Caring for adults (sick, elderly), 20:Commuting (to/from work or school), 21:Traveling (not for work or school), 22:Exercising, 23:Social activities and hobbies, 24:Religious activities, 25:Weaving / sewing / textile care, 26:Farming, crop cultivation,, 27:Livestock raising (cattle, poultry, sheep, etc.), 28:Shopping / getting service (incl. health services), 29:Horticulture

[77] [endtime\\_33: Until what time? <font color="maroon">\(%hrs\\_33% hours %min\\_33% minutes\)</font>](#)

Categories: 1:00:00, 2:00:15, 3:00:30, 4:00:45, 5:01:00, 6:01:15, 7:01:30, 8:01:45, 9:02:00, 10:02:15, 11:02:30, 12:02:45, 13:03:00, 14:03:15, 15:03:30, 16:03:45, 17:04:00, 18:04:15, 19:04:30, 20:04:45, 21:05:00, 22:05:15, 23:05:30, 24:05:45, 25:06:00, 26:06:15, 27:06:30, 28:06:45, 29:07:00, 30:07:15, 31:07:30, 32:07:45, 33:08:00, 34:08:15, 35:08:30, 36:08:45, 37:09:00, 38:09:15, 39:09:30, 40:09:45, 41:10:00, 42:10:15, 43:10:30, 44:10:45, 45:11:00, 46:11:15, 47:11:30, 48:11:45, 49:12:00, 50:12:15, 51:12:30, 52:12:45, 53:13:00, 54:13:15, 55:13:30, 56:13:45, 57:14:00, 58:14:15, 59:14:30, 60:14:45, 61:15:00, 62:15:15, 63:15:30, 64:15:45, 65:16:00, 66:16:15, 67:16:30, 68:16:45, 69:17:00, 70:17:15, 71:17:30, 72:17:45, 73:18:00, 74:18:15, 75:18:30, 76:18:45, 77:19:00, 78:19:15, 79:19:30, 80:19:45, 81:20:00, 82:20:15, 83:20:30, 84:20:45, 85:21:00, 86:21:15, 87:21:30, 88:21:45, 89:22:00, 90:22:15, 91:22:30, 92:22:45, 93:23:00, 94:23:15, 95:23:30, 96:23:45

[78] [activity\\_34: From <font color="maroon">%activity\\_33%</font>, what did you do?](#)

Categories: 1:Selling products and/or services in a shop, for self or household member, 2:Selling products and/or services door-to-door, for self or household member, 3:Sourcing and transporting products for trade e.g. day-old chicks, semen straws, feed, drugs etc, 4:Value -addition to the traded product e.g. processing meat, caring for the incubation process, grading etc, 5:Cleaning equipment and premises, 6:Communicating with suppliers, 7:Business group meetings (SACCO or ROSCA meetings, etc), 8:Business or self-employment activities (other than the agri-enterprise) for self or household member, 9:Work as employed, 10:Going to the bank, 11:Bookkeeping, 18:Sleeping and resting, 13:Eating and drinking, 14:Personal care, 15:School (incl. homework), 16:Cooking, 17:Domestic work (incl. fetching water, fuel), 12:Caring for children, 19:Caring for adults (sick, elderly), 20:Commuting (to/from work or school), 21:Traveling (not for work or school), 22:Exercising, 23:Social activities and hobbies, 24:Religious activities, 25:Weaving / sewing / textile care,

26:Farming, crop cultivation,, 27:Livestock raising (cattle, poultry, sheep, etc.), 28:Shopping / getting service (incl. health services), 29:Horticulture

[79] [endtime\\_34: Until what time? <font color="maroon">\(%hrs\\_34% hours %min\\_34% minutes\)</font>](#)

Categories: 1:00:00, 2:00:15, 3:00:30, 4:00:45, 5:01:00, 6:01:15, 7:01:30, 8:01:45, 9:02:00, 10:02:15, 11:02:30, 12:02:45, 13:03:00, 14:03:15, 15:03:30, 16:03:45, 17:04:00, 18:04:15, 19:04:30, 20:04:45, 21:05:00, 22:05:15, 23:05:30, 24:05:45, 25:06:00, 26:06:15, 27:06:30, 28:06:45, 29:07:00, 30:07:15, 31:07:30, 32:07:45, 33:08:00, 34:08:15, 35:08:30, 36:08:45, 37:09:00, 38:09:15, 39:09:30, 40:09:45, 41:10:00, 42:10:15, 43:10:30, 44:10:45, 45:11:00, 46:11:15, 47:11:30, 48:11:45, 49:12:00, 50:12:15, 51:12:30, 52:12:45, 53:13:00, 54:13:15, 55:13:30, 56:13:45, 57:14:00, 58:14:15, 59:14:30, 60:14:45, 61:15:00, 62:15:15, 63:15:30, 64:15:45, 65:16:00, 66:16:15, 67:16:30, 68:16:45, 69:17:00, 70:17:15, 71:17:30, 72:17:45, 73:18:00, 74:18:15, 75:18:30, 76:18:45, 77:19:00, 78:19:15, 79:19:30, 80:19:45, 81:20:00, 82:20:15, 83:20:30, 84:20:45, 85:21:00, 86:21:15, 87:21:30, 88:21:45, 89:22:00, 90:22:15, 91:22:30, 92:22:45, 93:23:00, 94:23:15, 95:23:30, 96:23:45

[80] [activity\\_35: From <font color="maroon">%activity\\_34%</font>, what did you do?](#)

Categories: 1:Selling products and/or services in a shop, for self or household member, 2:Selling products and/or services door-to-door, for self or household member, 3:Sourcing and transporting products for trade e.g. day-old chicks, semen straws, feed, drugs etc, 4:Value -addition to the traded product e.g. processing meat, caring for the incubation process, grading etc, 5:Cleaning equipment and premises, 6:Communicating with suppliers, 7:Business group meetings (SACCO or ROSCA meetings, etc), 8:Business or self-employment activities (other than the agri-enterprise) for self or household member, 9:Work as employed, 10:Going to the bank, 11:Bookkeeping, 18:Sleeping and resting, 13:Eating and drinking, 14:Personal care, 15:School (incl. homework), 16:Cooking, 17:Domestic work (incl. fetching water, fuel), 12:Caring for children, 19:Caring for adults (sick, elderly), 20:Commuting (to/from work or school), 21:Traveling (not for work or school), 22:Exercising, 23:Social activities and hobbies, 24:Religious activities, 25:Weaving / sewing / textile care, 26:Farming, crop cultivation,, 27:Livestock raising (cattle, poultry, sheep, etc.), 28:Shopping / getting service (incl. health services), 29:Horticulture

[81] [endtime\\_35: Until what time? <font color="maroon">\(%hrs\\_35% hours %min\\_35% minutes\)</font>](#)

Categories: 1:00:00, 2:00:15, 3:00:30, 4:00:45, 5:01:00, 6:01:15, 7:01:30, 8:01:45, 9:02:00, 10:02:15, 11:02:30, 12:02:45, 13:03:00, 14:03:15, 15:03:30, 16:03:45, 17:04:00, 18:04:15, 19:04:30, 20:04:45, 21:05:00, 22:05:15, 23:05:30, 24:05:45, 25:06:00, 26:06:15, 27:06:30, 28:06:45, 29:07:00, 30:07:15, 31:07:30, 32:07:45, 33:08:00, 34:08:15, 35:08:30, 36:08:45, 37:09:00, 38:09:15, 39:09:30, 40:09:45, 41:10:00, 42:10:15, 43:10:30, 44:10:45, 45:11:00, 46:11:15, 47:11:30, 48:11:45, 49:12:00, 50:12:15, 51:12:30, 52:12:45, 53:13:00, 54:13:15, 55:13:30, 56:13:45, 57:14:00, 58:14:15, 59:14:30, 60:14:45, 61:15:00, 62:15:15, 63:15:30, 64:15:45, 65:16:00, 66:16:15, 67:16:30, 68:16:45, 69:17:00, 70:17:15, 71:17:30, 72:17:45, 73:18:00, 74:18:15, 75:18:30, 76:18:45, 77:19:00, 78:19:15, 79:19:30, 80:19:45, 81:20:00, 82:20:15, 83:20:30, 84:20:45, 85:21:00, 86:21:15, 87:21:30, 88:21:45, 89:22:00, 90:22:15, 91:22:30, 92:22:45, 93:23:00, 94:23:15, 95:23:30, 96:23:45

[82] [activity\\_36: From <font color="maroon">%activity\\_35%</font>, what did you do?](#)

Categories: 1:Selling products and/or services in a shop, for self or household member, 2:Selling products and/or services door-to-door, for self or household member, 3:Sourcing and transporting products for trade e.g. day-old chicks, semen straws, feed, drugs etc, 4:Value -addition to the traded product e.g. processing meat, caring for the incubation process, grading etc, 5:Cleaning equipment and premises, 6:Communicating with suppliers, 7:Business group meetings (SACCO or ROSCA meetings, etc), 8:Business or self-employment activities (other than the agri-enterprise) for self or household member, 9:Work as employed, 10:Going to the bank, 11:Bookkeeping, 18:Sleeping and resting, 13:Eating and drinking, 14:Personal care, 15:School (incl. homework), 16:Cooking, 17:Domestic work (incl. fetching water, fuel), 12:Caring for children, 19:Caring for adults (sick, elderly), 20:Commuting (to/from work or school), 21:Traveling (not for work or school), 22:Exercising, 23:Social activities and hobbies, 24:Religious activities, 25:Weaving / sewing / textile care, 26:Farming, crop cultivation,, 27:Livestock raising (cattle, poultry, sheep, etc.), 28:Shopping / getting service (incl. health services), 29:Horticulture

[83] [endtime\\_36: Until what time? <font color="maroon">\(%hrs\\_36% hours %min\\_36% minutes\)</font>](#)

Categories: 1:00:00, 2:00:15, 3:00:30, 4:00:45, 5:01:00, 6:01:15, 7:01:30, 8:01:45, 9:02:00, 10:02:15, 11:02:30, 12:02:45, 13:03:00, 14:03:15, 15:03:30, 16:03:45, 17:04:00, 18:04:15, 19:04:30, 20:04:45, 21:05:00, 22:05:15, 23:05:30, 24:05:45, 25:06:00, 26:06:15, 27:06:30, 28:06:45, 29:07:00, 30:07:15, 31:07:30, 32:07:45, 33:08:00, 34:08:15, 35:08:30, 36:08:45, 37:09:00, 38:09:15, 39:09:30, 40:09:45, 41:10:00, 42:10:15, 43:10:30, 44:10:45, 45:11:00, 46:11:15, 47:11:30, 48:11:45, 49:12:00, 50:12:15, 51:12:30, 52:12:45, 53:13:00, 54:13:15, 55:13:30, 56:13:45, 57:14:00, 58:14:15, 59:14:30, 60:14:45, 61:15:00, 62:15:15, 63:15:30, 64:15:45, 65:16:00, 66:16:15, 67:16:30, 68:16:45, 69:17:00, 70:17:15, 71:17:30, 72:17:45, 73:18:00, 74:18:15, 75:18:30, 76:18:45, 77:19:00, 78:19:15, 79:19:30, 80:19:45, 81:20:00, 82:20:15, 83:20:30, 84:20:45, 85:21:00, 86:21:15, 87:21:30, 88:21:45, 89:22:00, 90:22:15, 91:22:30, 92:22:45, 93:23:00, 94:23:15, 95:23:30, 96:23:45

[84] [activity\\_37: From <font color="maroon">%activity\\_36%</font>, what did you do?](#)

Categories: 1:Selling products and/or services in a shop, for self or household member, 2:Selling products and/or services door-to-door, for self or household member, 3:Sourcing and transporting products for trade e.g. day-old chicks, semen straws, feed, drugs etc, 4:Value -addition to the traded product e.g. processing meat, caring for the incubation process, grading etc, 5:Cleaning equipment and premises, 6:Communicating with suppliers, 7:Business group meetings (SACCO or ROSCA meetings, etc), 8:Business or self-employment activities (other than the agri-enterprise) for self or household member, 9:Work as employed, 10:Going to the bank, 11:Bookkeeping, 18:Sleeping and resting, 13:Eating and drinking, 14:Personal care, 15:School (incl. homework), 16:Cooking, 17:Domestic work (incl. fetching water, fuel), 12:Caring for children, 19:Caring for adults (sick, elderly), 20:Commuting (to/from work or school), 21:Traveling (not for work or school), 22:Exercising, 23:Social activities and hobbies, 24:Religious activities, 25:Weaving / sewing / textile care,

26:Farming, crop cultivation,, 27:Livestock raising (cattle, poultry, sheep, etc.), 28:Shopping / getting service (incl. health services), 29:Horticulture

[85] [endtime\\_37: Until what time? <font color="maroon">\(%hrs\\_37% hours %min\\_37% minutes\)</font>](#)

Categories: 1:00:00, 2:00:15, 3:00:30, 4:00:45, 5:01:00, 6:01:15, 7:01:30, 8:01:45, 9:02:00, 10:02:15, 11:02:30, 12:02:45, 13:03:00, 14:03:15, 15:03:30, 16:03:45, 17:04:00, 18:04:15, 19:04:30, 20:04:45, 21:05:00, 22:05:15, 23:05:30, 24:05:45, 25:06:00, 26:06:15, 27:06:30, 28:06:45, 29:07:00, 30:07:15, 31:07:30, 32:07:45, 33:08:00, 34:08:15, 35:08:30, 36:08:45, 37:09:00, 38:09:15, 39:09:30, 40:09:45, 41:10:00, 42:10:15, 43:10:30, 44:10:45, 45:11:00, 46:11:15, 47:11:30, 48:11:45, 49:12:00, 50:12:15, 51:12:30, 52:12:45, 53:13:00, 54:13:15, 55:13:30, 56:13:45, 57:14:00, 58:14:15, 59:14:30, 60:14:45, 61:15:00, 62:15:15, 63:15:30, 64:15:45, 65:16:00, 66:16:15, 67:16:30, 68:16:45, 69:17:00, 70:17:15, 71:17:30, 72:17:45, 73:18:00, 74:18:15, 75:18:30, 76:18:45, 77:19:00, 78:19:15, 79:19:30, 80:19:45, 81:20:00, 82:20:15, 83:20:30, 84:20:45, 85:21:00, 86:21:15, 87:21:30, 88:21:45, 89:22:00, 90:22:15, 91:22:30, 92:22:45, 93:23:00, 94:23:15, 95:23:30, 96:23:45

[86] [activity\\_38: From <font color="maroon">%activity\\_37%</font>, what did you do?](#)

Categories: 1:Selling products and/or services in a shop, for self or household member, 2:Selling products and/or services door-to-door, for self or household member, 3:Sourcing and transporting products for trade e.g. day-old chicks, semen straws, feed, drugs etc, 4:Value -addition to the traded product e.g. processing meat, caring for the incubation process, grading etc, 5:Cleaning equipment and premises, 6:Communicating with suppliers, 7:Business group meetings (SACCO or ROSCA meetings, etc), 8:Business or self-employment activities (other than the agri-enterprise) for self or household member, 9:Work as employed, 10:Going to the bank, 11:Bookkeeping, 18:Sleeping and resting, 13:Eating and drinking, 14:Personal care, 15:School (incl. homework), 16:Cooking, 17:Domestic work (incl. fetching water, fuel), 12:Caring for children, 19:Caring for adults (sick, elderly), 20:Commuting (to/from work or school), 21:Traveling (not for work or school), 22:Exercising, 23:Social activities and hobbies, 24:Religious activities, 25:Weaving / sewing / textile care, 26:Farming, crop cultivation,, 27:Livestock raising (cattle, poultry, sheep, etc.), 28:Shopping / getting service (incl. health services), 29:Horticulture

[87] [endtime\\_38: Until what time? <font color="maroon">\(%hrs\\_38% hours %min\\_38% minutes\)</font>](#)

Categories: 1:00:00, 2:00:15, 3:00:30, 4:00:45, 5:01:00, 6:01:15, 7:01:30, 8:01:45, 9:02:00, 10:02:15, 11:02:30, 12:02:45, 13:03:00, 14:03:15, 15:03:30, 16:03:45, 17:04:00, 18:04:15, 19:04:30, 20:04:45, 21:05:00, 22:05:15, 23:05:30, 24:05:45, 25:06:00, 26:06:15, 27:06:30, 28:06:45, 29:07:00, 30:07:15, 31:07:30, 32:07:45, 33:08:00, 34:08:15, 35:08:30, 36:08:45, 37:09:00, 38:09:15, 39:09:30, 40:09:45, 41:10:00, 42:10:15, 43:10:30, 44:10:45, 45:11:00, 46:11:15, 47:11:30, 48:11:45, 49:12:00, 50:12:15, 51:12:30, 52:12:45, 53:13:00, 54:13:15, 55:13:30, 56:13:45, 57:14:00, 58:14:15, 59:14:30, 60:14:45, 61:15:00, 62:15:15, 63:15:30, 64:15:45, 65:16:00, 66:16:15, 67:16:30, 68:16:45, 69:17:00, 70:17:15, 71:17:30, 72:17:45, 73:18:00, 74:18:15, 75:18:30, 76:18:45, 77:19:00, 78:19:15, 79:19:30, 80:19:45, 81:20:00, 82:20:15, 83:20:30, 84:20:45, 85:21:00, 86:21:15, 87:21:30, 88:21:45, 89:22:00, 90:22:15, 91:22:30, 92:22:45, 93:23:00, 94:23:15, 95:23:30, 96:23:45

[88] [activity\\_39: From <font color="maroon">%activity\\_38%</font>, what did you do?](#)

Categories: 1:Selling products and/or services in a shop, for self or household member, 2:Selling products and/or services door-to-door, for self or household member, 3:Sourcing and transporting products for trade e.g. day-old chicks, semen straws, feed, drugs etc, 4:Value -addition to the traded product e.g. processing meat, caring for the incubation process, grading etc, 5:Cleaning equipment and premises, 6:Communicating with suppliers, 7:Business group meetings (SACCO or ROSCA meetings, etc), 8:Business or self-employment activities (other than the agri-enterprise) for self or household member, 9:Work as employed, 10:Going to the bank, 11:Bookkeeping, 18:Sleeping and resting, 13:Eating and drinking, 14:Personal care, 15:School (incl. homework), 16:Cooking, 17:Domestic work (incl. fetching water, fuel), 12:Caring for children, 19:Caring for adults (sick, elderly), 20:Commuting (to/from work or school), 21:Traveling (not for work or school), 22:Exercising, 23:Social activities and hobbies, 24:Religious activities, 25:Weaving / sewing / textile care, 26:Farming, crop cultivation,, 27:Livestock raising (cattle, poultry, sheep, etc.), 28:Shopping / getting service (incl. health services), 29:Horticulture

[89] [endtime\\_39: Until what time? <font color="maroon">\(%hrs\\_39% hours %min\\_39% minutes\)</font>](#)

Categories: 1:00:00, 2:00:15, 3:00:30, 4:00:45, 5:01:00, 6:01:15, 7:01:30, 8:01:45, 9:02:00, 10:02:15, 11:02:30, 12:02:45, 13:03:00, 14:03:15, 15:03:30, 16:03:45, 17:04:00, 18:04:15, 19:04:30, 20:04:45, 21:05:00, 22:05:15, 23:05:30, 24:05:45, 25:06:00, 26:06:15, 27:06:30, 28:06:45, 29:07:00, 30:07:15, 31:07:30, 32:07:45, 33:08:00, 34:08:15, 35:08:30, 36:08:45, 37:09:00, 38:09:15, 39:09:30, 40:09:45, 41:10:00, 42:10:15, 43:10:30, 44:10:45, 45:11:00, 46:11:15, 47:11:30, 48:11:45, 49:12:00, 50:12:15, 51:12:30, 52:12:45, 53:13:00, 54:13:15, 55:13:30, 56:13:45, 57:14:00, 58:14:15, 59:14:30, 60:14:45, 61:15:00, 62:15:15, 63:15:30, 64:15:45, 65:16:00, 66:16:15, 67:16:30, 68:16:45, 69:17:00, 70:17:15, 71:17:30, 72:17:45, 73:18:00, 74:18:15, 75:18:30, 76:18:45, 77:19:00, 78:19:15, 79:19:30, 80:19:45, 81:20:00, 82:20:15, 83:20:30, 84:20:45, 85:21:00, 86:21:15, 87:21:30, 88:21:45, 89:22:00, 90:22:15, 91:22:30, 92:22:45, 93:23:00, 94:23:15, 95:23:30, 96:23:45

[90] [activity\\_40: From <font color="maroon">%activity\\_39%</font>, what did you do?](#)

Categories: 1:Selling products and/or services in a shop, for self or household member, 2:Selling products and/or services door-to-door, for self or household member, 3:Sourcing and transporting products for trade e.g. day-old chicks, semen straws, feed, drugs etc, 4:Value -addition to the traded product e.g. processing meat, caring for the incubation process, grading etc, 5:Cleaning equipment and premises, 6:Communicating with suppliers, 7:Business group meetings (SACCO or ROSCA meetings, etc), 8:Business or self-employment activities (other than the agri-enterprise) for self or household member, 9:Work as employed, 10:Going to the bank, 11:Bookkeeping, 18:Sleeping and resting, 13:Eating and drinking, 14:Personal care, 15:School (incl. homework), 16:Cooking, 17:Domestic work (incl. fetching water, fuel), 12:Caring for children, 19:Caring for adults (sick, elderly), 20:Commuting (to/from work or school), 21:Traveling (not for work or school), 22:Exercising, 23:Social activities and hobbies, 24:Religious activities, 25:Weaving / sewing / textile care,

26:Farming, crop cultivation,, 27:Livestock raising (cattle, poultry, sheep, etc.), 28:Shopping / getting service (incl. health services), 29:Horticulture

[91] [endtime\\_40: Until what time? <font color="maroon">\(%hrs\\_40% hours %min\\_40% minutes\)</font>](#)

Categories: 1:00:00, 2:00:15, 3:00:30, 4:00:45, 5:01:00, 6:01:15, 7:01:30, 8:01:45, 9:02:00, 10:02:15, 11:02:30, 12:02:45, 13:03:00, 14:03:15, 15:03:30, 16:03:45, 17:04:00, 18:04:15, 19:04:30, 20:04:45, 21:05:00, 22:05:15, 23:05:30, 24:05:45, 25:06:00, 26:06:15, 27:06:30, 28:06:45, 29:07:00, 30:07:15, 31:07:30, 32:07:45, 33:08:00, 34:08:15, 35:08:30, 36:08:45, 37:09:00, 38:09:15, 39:09:30, 40:09:45, 41:10:00, 42:10:15, 43:10:30, 44:10:45, 45:11:00, 46:11:15, 47:11:30, 48:11:45, 49:12:00, 50:12:15, 51:12:30, 52:12:45, 53:13:00, 54:13:15, 55:13:30, 56:13:45, 57:14:00, 58:14:15, 59:14:30, 60:14:45, 61:15:00, 62:15:15, 63:15:30, 64:15:45, 65:16:00, 66:16:15, 67:16:30, 68:16:45, 69:17:00, 70:17:15, 71:17:30, 72:17:45, 73:18:00, 74:18:15, 75:18:30, 76:18:45, 77:19:00, 78:19:15, 79:19:30, 80:19:45, 81:20:00, 82:20:15, 83:20:30, 84:20:45, 85:21:00, 86:21:15, 87:21:30, 88:21:45, 89:22:00, 90:22:15, 91:22:30, 92:22:45, 93:23:00, 94:23:15, 95:23:30, 96:23:45

[92] [activity\\_41: From <font color="maroon">%activity\\_40%</font>, what did you do?](#)

Categories: 1:Selling products and/or services in a shop, for self or household member, 2:Selling products and/or services door-to-door, for self or household member, 3:Sourcing and transporting products for trade e.g. day-old chicks, semen straws, feed, drugs etc, 4:Value -addition to the traded product e.g. processing meat, caring for the incubation process, grading etc, 5:Cleaning equipment and premises, 6:Communicating with suppliers, 7:Business group meetings (SACCO or ROSCA meetings, etc), 8:Business or self-employment activities (other than the agri-enterprise) for self or household member, 9:Work as employed, 10:Going to the bank, 11:Bookkeeping, 18:Sleeping and resting, 13:Eating and drinking, 14:Personal care, 15:School (incl. homework), 16:Cooking, 17:Domestic work (incl. fetching water, fuel), 12:Caring for children, 19:Caring for adults (sick, elderly), 20:Commuting (to/from work or school), 21:Traveling (not for work or school), 22:Exercising, 23:Social activities and hobbies, 24:Religious activities, 25:Weaving / sewing / textile care, 26:Farming, crop cultivation,, 27:Livestock raising (cattle, poultry, sheep, etc.), 28:Shopping / getting service (incl. health services), 29:Horticulture

[93] [endtime\\_41: Until what time? <font color="maroon">\(%hrs\\_41% hours %min\\_41% minutes\)</font>](#)

Categories: 1:00:00, 2:00:15, 3:00:30, 4:00:45, 5:01:00, 6:01:15, 7:01:30, 8:01:45, 9:02:00, 10:02:15, 11:02:30, 12:02:45, 13:03:00, 14:03:15, 15:03:30, 16:03:45, 17:04:00, 18:04:15, 19:04:30, 20:04:45, 21:05:00, 22:05:15, 23:05:30, 24:05:45, 25:06:00, 26:06:15, 27:06:30, 28:06:45, 29:07:00, 30:07:15, 31:07:30, 32:07:45, 33:08:00, 34:08:15, 35:08:30, 36:08:45, 37:09:00, 38:09:15, 39:09:30, 40:09:45, 41:10:00, 42:10:15, 43:10:30, 44:10:45, 45:11:00, 46:11:15, 47:11:30, 48:11:45, 49:12:00, 50:12:15, 51:12:30, 52:12:45, 53:13:00, 54:13:15, 55:13:30, 56:13:45, 57:14:00, 58:14:15, 59:14:30, 60:14:45, 61:15:00, 62:15:15, 63:15:30, 64:15:45, 65:16:00, 66:16:15, 67:16:30, 68:16:45, 69:17:00, 70:17:15, 71:17:30, 72:17:45, 73:18:00, 74:18:15, 75:18:30, 76:18:45, 77:19:00, 78:19:15, 79:19:30, 80:19:45, 81:20:00, 82:20:15, 83:20:30, 84:20:45, 85:21:00, 86:21:15, 87:21:30, 88:21:45, 89:22:00, 90:22:15, 91:22:30, 92:22:45, 93:23:00, 94:23:15, 95:23:30, 96:23:45

[94] [activity\\_42: From <font color="maroon">%activity\\_41%</font>, what did you do?](#)

Categories: 1:Selling products and/or services in a shop, for self or household member, 2:Selling products and/or services door-to-door, for self or household member, 3:Sourcing and transporting products for trade e.g. day-old chicks, semen straws, feed, drugs etc, 4:Value -addition to the traded product e.g. processing meat, caring for the incubation process, grading etc, 5:Cleaning equipment and premises, 6:Communicating with suppliers, 7:Business group meetings (SACCO or ROSCA meetings, etc), 8:Business or self-employment activities (other than the agri-enterprise) for self or household member, 9:Work as employed, 10:Going to the bank, 11:Bookkeeping, 18:Sleeping and resting, 13:Eating and drinking, 14:Personal care, 15:School (incl. homework), 16:Cooking, 17:Domestic work (incl. fetching water, fuel), 12:Caring for children, 19:Caring for adults (sick, elderly), 20:Commuting (to/from work or school), 21:Traveling (not for work or school), 22:Exercising, 23:Social activities and hobbies, 24:Religious activities, 25:Weaving / sewing / textile care, 26:Farming, crop cultivation,, 27:Livestock raising (cattle, poultry, sheep, etc.), 28:Shopping / getting service (incl. health services), 29:Horticulture

[95] [endtime\\_42: Until what time? <font color="maroon">\(%hrs\\_42% hours %min\\_42% minutes\)</font>](#)

Categories: 1:00:00, 2:00:15, 3:00:30, 4:00:45, 5:01:00, 6:01:15, 7:01:30, 8:01:45, 9:02:00, 10:02:15, 11:02:30, 12:02:45, 13:03:00, 14:03:15, 15:03:30, 16:03:45, 17:04:00, 18:04:15, 19:04:30, 20:04:45, 21:05:00, 22:05:15, 23:05:30, 24:05:45, 25:06:00, 26:06:15, 27:06:30, 28:06:45, 29:07:00, 30:07:15, 31:07:30, 32:07:45, 33:08:00, 34:08:15, 35:08:30, 36:08:45, 37:09:00, 38:09:15, 39:09:30, 40:09:45, 41:10:00, 42:10:15, 43:10:30, 44:10:45, 45:11:00, 46:11:15, 47:11:30, 48:11:45, 49:12:00, 50:12:15, 51:12:30, 52:12:45, 53:13:00, 54:13:15, 55:13:30, 56:13:45, 57:14:00, 58:14:15, 59:14:30, 60:14:45, 61:15:00, 62:15:15, 63:15:30, 64:15:45, 65:16:00, 66:16:15, 67:16:30, 68:16:45, 69:17:00, 70:17:15, 71:17:30, 72:17:45, 73:18:00, 74:18:15, 75:18:30, 76:18:45, 77:19:00, 78:19:15, 79:19:30, 80:19:45, 81:20:00, 82:20:15, 83:20:30, 84:20:45, 85:21:00, 86:21:15, 87:21:30, 88:21:45, 89:22:00, 90:22:15, 91:22:30, 92:22:45, 93:23:00, 94:23:15, 95:23:30, 96:23:45

[96] [activity\\_43: From <font color="maroon">%activity\\_42%</font>, what did you do?](#)

Categories: 1:Selling products and/or services in a shop, for self or household member, 2:Selling products and/or services door-to-door, for self or household member, 3:Sourcing and transporting products for trade e.g. day-old chicks, semen straws, feed, drugs etc, 4:Value -addition to the traded product e.g. processing meat, caring for the incubation process, grading etc, 5:Cleaning equipment and premises, 6:Communicating with suppliers, 7:Business group meetings (SACCO or ROSCA meetings, etc), 8:Business or self-employment activities (other than the agri-enterprise) for self or household member, 9:Work as employed, 10:Going to the bank, 11:Bookkeeping, 18:Sleeping and resting, 13:Eating and drinking, 14:Personal care, 15:School (incl. homework), 16:Cooking, 17:Domestic work (incl. fetching water, fuel), 12:Caring for children, 19:Caring for adults (sick, elderly), 20:Commuting (to/from work or school), 21:Traveling (not for work or school), 22:Exercising, 23:Social activities and hobbies, 24:Religious activities, 25:Weaving / sewing / textile care,

26:Farming, crop cultivation,, 27:Livestock raising (cattle, poultry, sheep, etc.), 28:Shopping / getting service (incl. health services), 29:Horticulture

[97] [endtime\\_43: Until what time? <font color="maroon">\(%hrs\\_43% hours %min\\_43% minutes\)</font>](#)

Categories: 1:00:00, 2:00:15, 3:00:30, 4:00:45, 5:01:00, 6:01:15, 7:01:30, 8:01:45, 9:02:00, 10:02:15, 11:02:30, 12:02:45, 13:03:00, 14:03:15, 15:03:30, 16:03:45, 17:04:00, 18:04:15, 19:04:30, 20:04:45, 21:05:00, 22:05:15, 23:05:30, 24:05:45, 25:06:00, 26:06:15, 27:06:30, 28:06:45, 29:07:00, 30:07:15, 31:07:30, 32:07:45, 33:08:00, 34:08:15, 35:08:30, 36:08:45, 37:09:00, 38:09:15, 39:09:30, 40:09:45, 41:10:00, 42:10:15, 43:10:30, 44:10:45, 45:11:00, 46:11:15, 47:11:30, 48:11:45, 49:12:00, 50:12:15, 51:12:30, 52:12:45, 53:13:00, 54:13:15, 55:13:30, 56:13:45, 57:14:00, 58:14:15, 59:14:30, 60:14:45, 61:15:00, 62:15:15, 63:15:30, 64:15:45, 65:16:00, 66:16:15, 67:16:30, 68:16:45, 69:17:00, 70:17:15, 71:17:30, 72:17:45, 73:18:00, 74:18:15, 75:18:30, 76:18:45, 77:19:00, 78:19:15, 79:19:30, 80:19:45, 81:20:00, 82:20:15, 83:20:30, 84:20:45, 85:21:00, 86:21:15, 87:21:30, 88:21:45, 89:22:00, 90:22:15, 91:22:30, 92:22:45, 93:23:00, 94:23:15, 95:23:30, 96:23:45

[98] [activity\\_44: From <font color="maroon">%activity\\_43%</font>, what did you do?](#)

Categories: 1:Selling products and/or services in a shop, for self or household member, 2:Selling products and/or services door-to-door, for self or household member, 3:Sourcing and transporting products for trade e.g. day-old chicks, semen straws, feed, drugs etc, 4:Value -addition to the traded product e.g. processing meat, caring for the incubation process, grading etc, 5:Cleaning equipment and premises, 6:Communicating with suppliers, 7:Business group meetings (SACCO or ROSCA meetings, etc), 8:Business or self-employment activities (other than the agri-enterprise) for self or household member, 9:Work as employed, 10:Going to the bank, 11:Bookkeeping, 18:Sleeping and resting, 13:Eating and drinking, 14:Personal care, 15:School (incl. homework), 16:Cooking, 17:Domestic work (incl. fetching water, fuel), 12:Caring for children, 19:Caring for adults (sick, elderly), 20:Commuting (to/from work or school), 21:Traveling (not for work or school), 22:Exercising, 23:Social activities and hobbies, 24:Religious activities, 25:Weaving / sewing / textile care, 26:Farming, crop cultivation,, 27:Livestock raising (cattle, poultry, sheep, etc.), 28:Shopping / getting service (incl. health services), 29:Horticulture

[99] [endtime\\_44: Until what time? <font color="maroon">\(%hrs\\_44% hours %min\\_44% minutes\)</font>](#)

Categories: 1:00:00, 2:00:15, 3:00:30, 4:00:45, 5:01:00, 6:01:15, 7:01:30, 8:01:45, 9:02:00, 10:02:15, 11:02:30, 12:02:45, 13:03:00, 14:03:15, 15:03:30, 16:03:45, 17:04:00, 18:04:15, 19:04:30, 20:04:45, 21:05:00, 22:05:15, 23:05:30, 24:05:45, 25:06:00, 26:06:15, 27:06:30, 28:06:45, 29:07:00, 30:07:15, 31:07:30, 32:07:45, 33:08:00, 34:08:15, 35:08:30, 36:08:45, 37:09:00, 38:09:15, 39:09:30, 40:09:45, 41:10:00, 42:10:15, 43:10:30, 44:10:45, 45:11:00, 46:11:15, 47:11:30, 48:11:45, 49:12:00, 50:12:15, 51:12:30, 52:12:45, 53:13:00, 54:13:15, 55:13:30, 56:13:45, 57:14:00, 58:14:15, 59:14:30, 60:14:45, 61:15:00, 62:15:15, 63:15:30, 64:15:45, 65:16:00, 66:16:15, 67:16:30, 68:16:45, 69:17:00, 70:17:15, 71:17:30, 72:17:45, 73:18:00, 74:18:15, 75:18:30, 76:18:45, 77:19:00, 78:19:15, 79:19:30, 80:19:45, 81:20:00, 82:20:15, 83:20:30, 84:20:45, 85:21:00, 86:21:15, 87:21:30, 88:21:45, 89:22:00, 90:22:15, 91:22:30, 92:22:45, 93:23:00, 94:23:15, 95:23:30, 96:23:45

[100] [activity\\_45: From <font color="maroon">%activity\\_44%</font>, what did you do?](#)

Categories: 1:Selling products and/or services in a shop, for self or household member, 2:Selling products and/or services door-to-door, for self or household member, 3:Sourcing and transporting products for trade e.g. day-old chicks, semen straws, feed, drugs etc, 4:Value -addition to the traded product e.g. processing meat, caring for the incubation process, grading etc, 5:Cleaning equipment and premises, 6:Communicating with suppliers, 7:Business group meetings (SACCO or ROSCA meetings, etc), 8:Business or self-employment activities (other than the agri-enterprise) for self or household member, 9:Work as employed, 10:Going to the bank, 11:Bookkeeping, 18:Sleeping and resting, 13:Eating and drinking, 14:Personal care, 15:School (incl. homework), 16:Cooking, 17:Domestic work (incl. fetching water, fuel), 12:Caring for children, 19:Caring for adults (sick, elderly), 20:Commuting (to/from work or school), 21:Traveling (not for work or school), 22:Exercising, 23:Social activities and hobbies, 24:Religious activities, 25:Weaving / sewing / textile care, 26:Farming, crop cultivation,, 27:Livestock raising (cattle, poultry, sheep, etc.), 28:Shopping / getting service (incl. health services), 29:Horticulture

[101] [endtime\\_45: Until what time? <font color="maroon">\(%hrs\\_45% hours %min\\_45% minutes\)</font>](#)

Categories: 1:00:00, 2:00:15, 3:00:30, 4:00:45, 5:01:00, 6:01:15, 7:01:30, 8:01:45, 9:02:00, 10:02:15, 11:02:30, 12:02:45, 13:03:00, 14:03:15, 15:03:30, 16:03:45, 17:04:00, 18:04:15, 19:04:30, 20:04:45, 21:05:00, 22:05:15, 23:05:30, 24:05:45, 25:06:00, 26:06:15, 27:06:30, 28:06:45, 29:07:00, 30:07:15, 31:07:30, 32:07:45, 33:08:00, 34:08:15, 35:08:30, 36:08:45, 37:09:00, 38:09:15, 39:09:30, 40:09:45, 41:10:00, 42:10:15, 43:10:30, 44:10:45, 45:11:00, 46:11:15, 47:11:30, 48:11:45, 49:12:00, 50:12:15, 51:12:30, 52:12:45, 53:13:00, 54:13:15, 55:13:30, 56:13:45, 57:14:00, 58:14:15, 59:14:30, 60:14:45, 61:15:00, 62:15:15, 63:15:30, 64:15:45, 65:16:00, 66:16:15, 67:16:30, 68:16:45, 69:17:00, 70:17:15, 71:17:30, 72:17:45, 73:18:00, 74:18:15, 75:18:30, 76:18:45, 77:19:00, 78:19:15, 79:19:30, 80:19:45, 81:20:00, 82:20:15, 83:20:30, 84:20:45, 85:21:00, 86:21:15, 87:21:30, 88:21:45, 89:22:00, 90:22:15, 91:22:30, 92:22:45, 93:23:00, 94:23:15, 95:23:30, 96:23:45

[102] [activity\\_46: From <font color="maroon">%activity\\_45%</font>, what did you do?](#)

Categories: 1:Selling products and/or services in a shop, for self or household member, 2:Selling products and/or services door-to-door, for self or household member, 3:Sourcing and transporting products for trade e.g. day-old chicks, semen straws, feed, drugs etc, 4:Value -addition to the traded product e.g. processing meat, caring for the incubation process, grading etc, 5:Cleaning equipment and premises, 6:Communicating with suppliers, 7:Business group meetings (SACCO or ROSCA meetings, etc), 8:Business or self-employment activities (other than the agri-enterprise) for self or household member, 9:Work as employed, 10:Going to the bank, 11:Bookkeeping, 18:Sleeping and resting, 13:Eating and drinking, 14:Personal care, 15:School (incl. homework), 16:Cooking, 17:Domestic work (incl. fetching water, fuel), 12:Caring for children, 19:Caring for adults (sick, elderly), 20:Commuting (to/from work or school), 21:Traveling (not for work or school), 22:Exercising, 23:Social activities and hobbies, 24:Religious activities, 25:Weaving / sewing / textile care,

26:Farming, crop cultivation,, 27:Livestock raising (cattle, poultry, sheep, etc.), 28:Shopping / getting service (incl. health services), 29:Horticulture

[103] [endtime\\_46: Until what time? <font color="maroon">\(%hrs\\_46% hours %min\\_46% minutes\)</font>](#)

Categories: 1:00:00, 2:00:15, 3:00:30, 4:00:45, 5:01:00, 6:01:15, 7:01:30, 8:01:45, 9:02:00, 10:02:15, 11:02:30, 12:02:45, 13:03:00, 14:03:15, 15:03:30, 16:03:45, 17:04:00, 18:04:15, 19:04:30, 20:04:45, 21:05:00, 22:05:15, 23:05:30, 24:05:45, 25:06:00, 26:06:15, 27:06:30, 28:06:45, 29:07:00, 30:07:15, 31:07:30, 32:07:45, 33:08:00, 34:08:15, 35:08:30, 36:08:45, 37:09:00, 38:09:15, 39:09:30, 40:09:45, 41:10:00, 42:10:15, 43:10:30, 44:10:45, 45:11:00, 46:11:15, 47:11:30, 48:11:45, 49:12:00, 50:12:15, 51:12:30, 52:12:45, 53:13:00, 54:13:15, 55:13:30, 56:13:45, 57:14:00, 58:14:15, 59:14:30, 60:14:45, 61:15:00, 62:15:15, 63:15:30, 64:15:45, 65:16:00, 66:16:15, 67:16:30, 68:16:45, 69:17:00, 70:17:15, 71:17:30, 72:17:45, 73:18:00, 74:18:15, 75:18:30, 76:18:45, 77:19:00, 78:19:15, 79:19:30, 80:19:45, 81:20:00, 82:20:15, 83:20:30, 84:20:45, 85:21:00, 86:21:15, 87:21:30, 88:21:45, 89:22:00, 90:22:15, 91:22:30, 92:22:45, 93:23:00, 94:23:15, 95:23:30, 96:23:45

[104] [activity\\_47: From <font color="maroon">%activity\\_46%</font>, what did you do?](#)

Categories: 1:Selling products and/or services in a shop, for self or household member, 2:Selling products and/or services door-to-door, for self or household member, 3:Sourcing and transporting products for trade e.g. day-old chicks, semen straws, feed, drugs etc, 4:Value -addition to the traded product e.g. processing meat, caring for the incubation process, grading etc, 5:Cleaning equipment and premises, 6:Communicating with suppliers, 7:Business group meetings (SACCO or ROSCA meetings, etc), 8:Business or self-employment activities (other than the agri-enterprise) for self or household member, 9:Work as employed, 10:Going to the bank, 11:Bookkeeping, 18:Sleeping and resting, 13:Eating and drinking, 14:Personal care, 15:School (incl. homework), 16:Cooking, 17:Domestic work (incl. fetching water, fuel), 12:Caring for children, 19:Caring for adults (sick, elderly), 20:Commuting (to/from work or school), 21:Traveling (not for work or school), 22:Exercising, 23:Social activities and hobbies, 24:Religious activities, 25:Weaving / sewing / textile care, 26:Farming, crop cultivation,, 27:Livestock raising (cattle, poultry, sheep, etc.), 28:Shopping / getting service (incl. health services), 29:Horticulture

[105] [endtime\\_47: Until what time? <font color="maroon">\(%hrs\\_47% hours %min\\_47% minutes\)</font>](#)

Categories: 1:00:00, 2:00:15, 3:00:30, 4:00:45, 5:01:00, 6:01:15, 7:01:30, 8:01:45, 9:02:00, 10:02:15, 11:02:30, 12:02:45, 13:03:00, 14:03:15, 15:03:30, 16:03:45, 17:04:00, 18:04:15, 19:04:30, 20:04:45, 21:05:00, 22:05:15, 23:05:30, 24:05:45, 25:06:00, 26:06:15, 27:06:30, 28:06:45, 29:07:00, 30:07:15, 31:07:30, 32:07:45, 33:08:00, 34:08:15, 35:08:30, 36:08:45, 37:09:00, 38:09:15, 39:09:30, 40:09:45, 41:10:00, 42:10:15, 43:10:30, 44:10:45, 45:11:00, 46:11:15, 47:11:30, 48:11:45, 49:12:00, 50:12:15, 51:12:30, 52:12:45, 53:13:00, 54:13:15, 55:13:30, 56:13:45, 57:14:00, 58:14:15, 59:14:30, 60:14:45, 61:15:00, 62:15:15, 63:15:30, 64:15:45, 65:16:00, 66:16:15, 67:16:30, 68:16:45, 69:17:00, 70:17:15, 71:17:30, 72:17:45, 73:18:00, 74:18:15, 75:18:30, 76:18:45, 77:19:00, 78:19:15, 79:19:30, 80:19:45, 81:20:00, 82:20:15, 83:20:30, 84:20:45, 85:21:00, 86:21:15, 87:21:30, 88:21:45, 89:22:00, 90:22:15, 91:22:30, 92:22:45, 93:23:00, 94:23:15, 95:23:30, 96:23:45

[106] [activity\\_48: From <font color="maroon">%activity\\_47%</font>, what did you do?](#)

Categories: 1:Selling products and/or services in a shop, for self or household member, 2:Selling products and/or services door-to-door, for self or household member, 3:Sourcing and transporting products for trade e.g. day-old chicks, semen straws, feed, drugs etc, 4:Value -addition to the traded product e.g. processing meat, caring for the incubation process, grading etc, 5:Cleaning equipment and premises, 6:Communicating with suppliers, 7:Business group meetings (SACCO or ROSCA meetings, etc), 8:Business or self-employment activities (other than the agri-enterprise) for self or household member, 9:Work as employed, 10:Going to the bank, 11:Bookkeeping, 18:Sleeping and resting, 13:Eating and drinking, 14:Personal care, 15:School (incl. homework), 16:Cooking, 17:Domestic work (incl. fetching water, fuel), 12:Caring for children, 19:Caring for adults (sick, elderly), 20:Commuting (to/from work or school), 21:Traveling (not for work or school), 22:Exercising, 23:Social activities and hobbies, 24:Religious activities, 25:Weaving / sewing / textile care, 26:Farming, crop cultivation,, 27:Livestock raising (cattle, poultry, sheep, etc.), 28:Shopping / getting service (incl. health services), 29:Horticulture

[107] [endtime\\_48: Until what time? <font color="maroon">\(%hrs\\_48% hours %min\\_48% minutes\)</font>](#)

Categories: 1:00:00, 2:00:15, 3:00:30, 4:00:45, 5:01:00, 6:01:15, 7:01:30, 8:01:45, 9:02:00, 10:02:15, 11:02:30, 12:02:45, 13:03:00, 14:03:15, 15:03:30, 16:03:45, 17:04:00, 18:04:15, 19:04:30, 20:04:45, 21:05:00, 22:05:15, 23:05:30, 24:05:45, 25:06:00, 26:06:15, 27:06:30, 28:06:45, 29:07:00, 30:07:15, 31:07:30, 32:07:45, 33:08:00, 34:08:15, 35:08:30, 36:08:45, 37:09:00, 38:09:15, 39:09:30, 40:09:45, 41:10:00, 42:10:15, 43:10:30, 44:10:45, 45:11:00, 46:11:15, 47:11:30, 48:11:45, 49:12:00, 50:12:15, 51:12:30, 52:12:45, 53:13:00, 54:13:15, 55:13:30, 56:13:45, 57:14:00, 58:14:15, 59:14:30, 60:14:45, 61:15:00, 62:15:15, 63:15:30, 64:15:45, 65:16:00, 66:16:15, 67:16:30, 68:16:45, 69:17:00, 70:17:15, 71:17:30, 72:17:45, 73:18:00, 74:18:15, 75:18:30, 76:18:45, 77:19:00, 78:19:15, 79:19:30, 80:19:45, 81:20:00, 82:20:15, 83:20:30, 84:20:45, 85:21:00, 86:21:15, 87:21:30, 88:21:45, 89:22:00, 90:22:15, 91:22:30, 92:22:45, 93:23:00, 94:23:15, 95:23:30, 96:23:45

[108] [activity\\_49: From <font color="maroon">%activity\\_48%</font>, what did you do?](#)

Categories: 1:Selling products and/or services in a shop, for self or household member, 2:Selling products and/or services door-to-door, for self or household member, 3:Sourcing and transporting products for trade e.g. day-old chicks, semen straws, feed, drugs etc, 4:Value -addition to the traded product e.g. processing meat, caring for the incubation process, grading etc, 5:Cleaning equipment and premises, 6:Communicating with suppliers, 7:Business group meetings (SACCO or ROSCA meetings, etc), 8:Business or self-employment activities (other than the agri-enterprise) for self or household member, 9:Work as employed, 10:Going to the bank, 11:Bookkeeping, 18:Sleeping and resting, 13:Eating and drinking, 14:Personal care, 15:School (incl. homework), 16:Cooking, 17:Domestic work (incl. fetching water, fuel), 12:Caring for children, 19:Caring for adults (sick, elderly), 20:Commuting (to/from work or school), 21:Traveling (not for work or school), 22:Exercising, 23:Social activities and hobbies, 24:Religious activities, 25:Weaving / sewing / textile care,

26:Farming, crop cultivation,, 27:Livestock raising (cattle, poultry, sheep, etc.), 28:Shopping / getting service (incl. health services), 29:Horticulture

[109] [endtime\\_49: Until what time?](#) (%hrs\_49% hours %min\_49% minutes)

Categories: 1:00:00, 2:00:15, 3:00:30, 4:00:45, 5:01:00, 6:01:15, 7:01:30, 8:01:45, 9:02:00, 10:02:15, 11:02:30, 12:02:45, 13:03:00, 14:03:15, 15:03:30, 16:03:45, 17:04:00, 18:04:15, 19:04:30, 20:04:45, 21:05:00, 22:05:15, 23:05:30, 24:05:45, 25:06:00, 26:06:15, 27:06:30, 28:06:45, 29:07:00, 30:07:15, 31:07:30, 32:07:45, 33:08:00, 34:08:15, 35:08:30, 36:08:45, 37:09:00, 38:09:15, 39:09:30, 40:09:45, 41:10:00, 42:10:15, 43:10:30, 44:10:45, 45:11:00, 46:11:15, 47:11:30, 48:11:45, 49:12:00, 50:12:15, 51:12:30, 52:12:45, 53:13:00, 54:13:15, 55:13:30, 56:13:45, 57:14:00, 58:14:15, 59:14:30, 60:14:45, 61:15:00, 62:15:15, 63:15:30, 64:15:45, 65:16:00, 66:16:15, 67:16:30, 68:16:45, 69:17:00, 70:17:15, 71:17:30, 72:17:45, 73:18:00, 74:18:15, 75:18:30, 76:18:45, 77:19:00, 78:19:15, 79:19:30, 80:19:45, 81:20:00, 82:20:15, 83:20:30, 84:20:45, 85:21:00, 86:21:15, 87:21:30, 88:21:45, 89:22:00, 90:22:15, 91:22:30, 92:22:45, 93:23:00, 94:23:15, 95:23:30, 96:23:45

[110] [activity\\_50: From](#) %activity\_49%, what did you do?

Categories: 1:Selling products and/or services in a shop, for self or household member, 2:Selling products and/or services door-to-door, for self or household member, 3:Sourcing and transporting products for trade e.g. day-old chicks, semen straws, feed, drugs etc, 4:Value -addition to the traded product e.g. processing meat, caring for the incubation process, grading etc, 5:Cleaning equipment and premises, 6:Communicating with suppliers, 7:Business group meetings (SACCO or ROSCA meetings, etc), 8:Business or self-employment activities (other than the agri-enterprise) for self or household member, 9:Work as employed, 10:Going to the bank, 11:Bookkeeping, 18:Sleeping and resting, 13:Eating and drinking, 14:Personal care, 15:School (incl. homework), 16:Cooking, 17:Domestic work (incl. fetching water, fuel), 12:Caring for children, 19:Caring for adults (sick, elderly), 20:Commuting (to/from work or school), 21:Traveling (not for work or school), 22:Exercising, 23:Social activities and hobbies, 24:Religious activities, 25:Weaving / sewing / textile care, 26:Farming, crop cultivation,, 27:Livestock raising (cattle, poultry, sheep, etc.), 28:Shopping / getting service (incl. health services), 29:Horticulture

[111] [endtime\\_50: Until what time?](#) (%hrs\_50% hours %min\_50% minutes)

Categories: 1:00:00, 2:00:15, 3:00:30, 4:00:45, 5:01:00, 6:01:15, 7:01:30, 8:01:45, 9:02:00, 10:02:15, 11:02:30, 12:02:45, 13:03:00, 14:03:15, 15:03:30, 16:03:45, 17:04:00, 18:04:15, 19:04:30, 20:04:45, 21:05:00, 22:05:15, 23:05:30, 24:05:45, 25:06:00, 26:06:15, 27:06:30, 28:06:45, 29:07:00, 30:07:15, 31:07:30, 32:07:45, 33:08:00, 34:08:15, 35:08:30, 36:08:45, 37:09:00, 38:09:15, 39:09:30, 40:09:45, 41:10:00, 42:10:15, 43:10:30, 44:10:45, 45:11:00, 46:11:15, 47:11:30, 48:11:45, 49:12:00, 50:12:15, 51:12:30, 52:12:45, 53:13:00, 54:13:15, 55:13:30, 56:13:45, 57:14:00, 58:14:15, 59:14:30, 60:14:45, 61:15:00, 62:15:15, 63:15:30, 64:15:45, 65:16:00, 66:16:15, 67:16:30, 68:16:45, 69:17:00, 70:17:15, 71:17:30, 72:17:45, 73:18:00, 74:18:15, 75:18:30, 76:18:45, 77:19:00, 78:19:15, 79:19:30, 80:19:45, 81:20:00, 82:20:15, 83:20:30, 84:20:45, 85:21:00, 86:21:15, 87:21:30, 88:21:45, 89:22:00, 90:22:15, 91:22:30, 92:22:45, 93:23:00, 94:23:15, 95:23:30, 96:23:45

[112] [activity\\_51: From](#) %activity\_50%, what did you do?

Categories: 1:Selling products and/or services in a shop, for self or household member, 2:Selling products and/or services door-to-door, for self or household member, 3:Sourcing and transporting products for trade e.g. day-old chicks, semen straws, feed, drugs etc, 4:Value -addition to the traded product e.g. processing meat, caring for the incubation process, grading etc, 5:Cleaning equipment and premises, 6:Communicating with suppliers, 7:Business group meetings (SACCO or ROSCA meetings, etc), 8:Business or self-employment activities (other than the agri-enterprise) for self or household member, 9:Work as employed, 10:Going to the bank, 11:Bookkeeping, 18:Sleeping and resting, 13:Eating and drinking, 14:Personal care, 15:School (incl. homework), 16:Cooking, 17:Domestic work (incl. fetching water, fuel), 12:Caring for children, 19:Caring for adults (sick, elderly), 20:Commuting (to/from work or school), 21:Traveling (not for work or school), 22:Exercising, 23:Social activities and hobbies, 24:Religious activities, 25:Weaving / sewing / textile care, 26:Farming, crop cultivation,, 27:Livestock raising (cattle, poultry, sheep, etc.), 28:Shopping / getting service (incl. health services), 29:Horticulture

[113] [endtime\\_51: Until what time?](#) (%hrs\_51% hours %min\_51% minutes)

Categories: 1:00:00, 2:00:15, 3:00:30, 4:00:45, 5:01:00, 6:01:15, 7:01:30, 8:01:45, 9:02:00, 10:02:15, 11:02:30, 12:02:45, 13:03:00, 14:03:15, 15:03:30, 16:03:45, 17:04:00, 18:04:15, 19:04:30, 20:04:45, 21:05:00, 22:05:15, 23:05:30, 24:05:45, 25:06:00, 26:06:15, 27:06:30, 28:06:45, 29:07:00, 30:07:15, 31:07:30, 32:07:45, 33:08:00, 34:08:15, 35:08:30, 36:08:45, 37:09:00, 38:09:15, 39:09:30, 40:09:45, 41:10:00, 42:10:15, 43:10:30, 44:10:45, 45:11:00, 46:11:15, 47:11:30, 48:11:45, 49:12:00, 50:12:15, 51:12:30, 52:12:45, 53:13:00, 54:13:15, 55:13:30, 56:13:45, 57:14:00, 58:14:15, 59:14:30, 60:14:45, 61:15:00, 62:15:15, 63:15:30, 64:15:45, 65:16:00, 66:16:15, 67:16:30, 68:16:45, 69:17:00, 70:17:15, 71:17:30, 72:17:45, 73:18:00, 74:18:15, 75:18:30, 76:18:45, 77:19:00, 78:19:15, 79:19:30, 80:19:45, 81:20:00, 82:20:15, 83:20:30, 84:20:45, 85:21:00, 86:21:15, 87:21:30, 88:21:45, 89:22:00, 90:22:15, 91:22:30, 92:22:45, 93:23:00, 94:23:15, 95:23:30, 96:23:45

[114] [activity\\_52: From](#) %activity\_51%, what did you do?

Categories: 1:Selling products and/or services in a shop, for self or household member, 2:Selling products and/or services door-to-door, for self or household member, 3:Sourcing and transporting products for trade e.g. day-old chicks, semen straws, feed, drugs etc, 4:Value -addition to the traded product e.g. processing meat, caring for the incubation process, grading etc, 5:Cleaning equipment and premises, 6:Communicating with suppliers, 7:Business group meetings (SACCO or ROSCA meetings, etc), 8:Business or self-employment activities (other than the agri-enterprise) for self or household member, 9:Work as employed, 10:Going to the bank, 11:Bookkeeping, 18:Sleeping and resting, 13:Eating and drinking, 14:Personal care, 15:School (incl. homework), 16:Cooking, 17:Domestic work (incl. fetching water, fuel), 12:Caring for children, 19:Caring for adults (sick, elderly), 20:Commuting (to/from work or school), 21:Traveling (not for work or school), 22:Exercising, 23:Social activities and hobbies, 24:Religious activities, 25:Weaving / sewing / textile care,

26:Farming, crop cultivation,, 27:Livestock raising (cattle, poultry, sheep, etc.), 28:Shopping / getting service (incl. health services), 29:Horticulture

[115] [endtime\\_52: Until what time?](#) <math>(\%hrs\\_52\% \text{ hours } \%min\\_52\% \text{ minutes})</math>

Categories: 1:00:00, 2:00:15, 3:00:30, 4:00:45, 5:01:00, 6:01:15, 7:01:30, 8:01:45, 9:02:00, 10:02:15, 11:02:30, 12:02:45, 13:03:00, 14:03:15, 15:03:30, 16:03:45, 17:04:00, 18:04:15, 19:04:30, 20:04:45, 21:05:00, 22:05:15, 23:05:30, 24:05:45, 25:06:00, 26:06:15, 27:06:30, 28:06:45, 29:07:00, 30:07:15, 31:07:30, 32:07:45, 33:08:00, 34:08:15, 35:08:30, 36:08:45, 37:09:00, 38:09:15, 39:09:30, 40:09:45, 41:10:00, 42:10:15, 43:10:30, 44:10:45, 45:11:00, 46:11:15, 47:11:30, 48:11:45, 49:12:00, 50:12:15, 51:12:30, 52:12:45, 53:13:00, 54:13:15, 55:13:30, 56:13:45, 57:14:00, 58:14:15, 59:14:30, 60:14:45, 61:15:00, 62:15:15, 63:15:30, 64:15:45, 65:16:00, 66:16:15, 67:16:30, 68:16:45, 69:17:00, 70:17:15, 71:17:30, 72:17:45, 73:18:00, 74:18:15, 75:18:30, 76:18:45, 77:19:00, 78:19:15, 79:19:30, 80:19:45, 81:20:00, 82:20:15, 83:20:30, 84:20:45, 85:21:00, 86:21:15, 87:21:30, 88:21:45, 89:22:00, 90:22:15, 91:22:30, 92:22:45, 93:23:00, 94:23:15, 95:23:30, 96:23:45

[116] [activity\\_53: From](#) <math>\%activity\\_52\%</math>, what did you do?

Categories: 1:Selling products and/or services in a shop, for self or household member, 2:Selling products and/or services door-to-door, for self or household member, 3:Sourcing and transporting products for trade e.g. day-old chicks, semen straws, feed, drugs etc, 4:Value -addition to the traded product e.g. processing meat, caring for the incubation process, grading etc, 5:Cleaning equipment and premises, 6:Communicating with suppliers, 7:Business group meetings (SACCO or ROSCA meetings, etc), 8:Business or self-employment activities (other than the agri-enterprise) for self or household member, 9:Work as employed, 10:Going to the bank, 11:Bookkeeping, 18:Sleeping and resting, 13:Eating and drinking, 14:Personal care, 15:School (incl. homework), 16:Cooking, 17:Domestic work (incl. fetching water, fuel), 12:Caring for children, 19:Caring for adults (sick, elderly), 20:Commuting (to/from work or school), 21:Traveling (not for work or school), 22:Exercising, 23:Social activities and hobbies, 24:Religious activities, 25:Weaving / sewing / textile care, 26:Farming, crop cultivation,, 27:Livestock raising (cattle, poultry, sheep, etc.), 28:Shopping / getting service (incl. health services), 29:Horticulture

[117] [endtime\\_53: Until what time?](#) <math>(\%hrs\\_53\% \text{ hours } \%min\\_53\% \text{ minutes})</math>

Categories: 1:00:00, 2:00:15, 3:00:30, 4:00:45, 5:01:00, 6:01:15, 7:01:30, 8:01:45, 9:02:00, 10:02:15, 11:02:30, 12:02:45, 13:03:00, 14:03:15, 15:03:30, 16:03:45, 17:04:00, 18:04:15, 19:04:30, 20:04:45, 21:05:00, 22:05:15, 23:05:30, 24:05:45, 25:06:00, 26:06:15, 27:06:30, 28:06:45, 29:07:00, 30:07:15, 31:07:30, 32:07:45, 33:08:00, 34:08:15, 35:08:30, 36:08:45, 37:09:00, 38:09:15, 39:09:30, 40:09:45, 41:10:00, 42:10:15, 43:10:30, 44:10:45, 45:11:00, 46:11:15, 47:11:30, 48:11:45, 49:12:00, 50:12:15, 51:12:30, 52:12:45, 53:13:00, 54:13:15, 55:13:30, 56:13:45, 57:14:00, 58:14:15, 59:14:30, 60:14:45, 61:15:00, 62:15:15, 63:15:30, 64:15:45, 65:16:00, 66:16:15, 67:16:30, 68:16:45, 69:17:00, 70:17:15, 71:17:30, 72:17:45, 73:18:00, 74:18:15, 75:18:30, 76:18:45, 77:19:00, 78:19:15, 79:19:30, 80:19:45, 81:20:00, 82:20:15, 83:20:30, 84:20:45, 85:21:00, 86:21:15, 87:21:30, 88:21:45, 89:22:00, 90:22:15, 91:22:30, 92:22:45, 93:23:00, 94:23:15, 95:23:30, 96:23:45

[118] [activity\\_54: From](#) <math>\%activity\\_53\%</math>, what did you do?

Categories: 1:Selling products and/or services in a shop, for self or household member, 2:Selling products and/or services door-to-door, for self or household member, 3:Sourcing and transporting products for trade e.g. day-old chicks, semen straws, feed, drugs etc, 4:Value -addition to the traded product e.g. processing meat, caring for the incubation process, grading etc, 5:Cleaning equipment and premises, 6:Communicating with suppliers, 7:Business group meetings (SACCO or ROSCA meetings, etc), 8:Business or self-employment activities (other than the agri-enterprise) for self or household member, 9:Work as employed, 10:Going to the bank, 11:Bookkeeping, 18:Sleeping and resting, 13:Eating and drinking, 14:Personal care, 15:School (incl. homework), 16:Cooking, 17:Domestic work (incl. fetching water, fuel), 12:Caring for children, 19:Caring for adults (sick, elderly), 20:Commuting (to/from work or school), 21:Traveling (not for work or school), 22:Exercising, 23:Social activities and hobbies, 24:Religious activities, 25:Weaving / sewing / textile care, 26:Farming, crop cultivation,, 27:Livestock raising (cattle, poultry, sheep, etc.), 28:Shopping / getting service (incl. health services), 29:Horticulture

[119] [endtime\\_54: Until what time?](#) <math>(\%hrs\\_54\% \text{ hours } \%min\\_54\% \text{ minutes})</math>

Categories: 1:00:00, 2:00:15, 3:00:30, 4:00:45, 5:01:00, 6:01:15, 7:01:30, 8:01:45, 9:02:00, 10:02:15, 11:02:30, 12:02:45, 13:03:00, 14:03:15, 15:03:30, 16:03:45, 17:04:00, 18:04:15, 19:04:30, 20:04:45, 21:05:00, 22:05:15, 23:05:30, 24:05:45, 25:06:00, 26:06:15, 27:06:30, 28:06:45, 29:07:00, 30:07:15, 31:07:30, 32:07:45, 33:08:00, 34:08:15, 35:08:30, 36:08:45, 37:09:00, 38:09:15, 39:09:30, 40:09:45, 41:10:00, 42:10:15, 43:10:30, 44:10:45, 45:11:00, 46:11:15, 47:11:30, 48:11:45, 49:12:00, 50:12:15, 51:12:30, 52:12:45, 53:13:00, 54:13:15, 55:13:30, 56:13:45, 57:14:00, 58:14:15, 59:14:30, 60:14:45, 61:15:00, 62:15:15, 63:15:30, 64:15:45, 65:16:00, 66:16:15, 67:16:30, 68:16:45, 69:17:00, 70:17:15, 71:17:30, 72:17:45, 73:18:00, 74:18:15, 75:18:30, 76:18:45, 77:19:00, 78:19:15, 79:19:30, 80:19:45, 81:20:00, 82:20:15, 83:20:30, 84:20:45, 85:21:00, 86:21:15, 87:21:30, 88:21:45, 89:22:00, 90:22:15, 91:22:30, 92:22:45, 93:23:00, 94:23:15, 95:23:30, 96:23:45

[120] [activity\\_55: From](#) <math>\%activity\\_54\%</math>, what did you do?

Categories: 1:Selling products and/or services in a shop, for self or household member, 2:Selling products and/or services door-to-door, for self or household member, 3:Sourcing and transporting products for trade e.g. day-old chicks, semen straws, feed, drugs etc, 4:Value -addition to the traded product e.g. processing meat, caring for the incubation process, grading etc, 5:Cleaning equipment and premises, 6:Communicating with suppliers, 7:Business group meetings (SACCO or ROSCA meetings, etc), 8:Business or self-employment activities (other than the agri-enterprise) for self or household member, 9:Work as employed, 10:Going to the bank, 11:Bookkeeping, 18:Sleeping and resting, 13:Eating and drinking, 14:Personal care, 15:School (incl. homework), 16:Cooking, 17:Domestic work (incl. fetching water, fuel), 12:Caring for children, 19:Caring for adults (sick, elderly), 20:Commuting (to/from work or school), 21:Traveling (not for work or school), 22:Exercising, 23:Social activities and hobbies, 24:Religious activities, 25:Weaving / sewing / textile care,

26:Farming, crop cultivation,, 27:Livestock raising (cattle, poultry, sheep, etc.), 28:Shopping / getting service (incl. health services), 29:Horticulture

[121] [endtime\\_55: Until what time? <font color="maroon">\(%hrs\\_55% hours %min\\_55% minutes\)</font>](#)

Categories: 1:00:00, 2:00:15, 3:00:30, 4:00:45, 5:01:00, 6:01:15, 7:01:30, 8:01:45, 9:02:00, 10:02:15, 11:02:30, 12:02:45, 13:03:00, 14:03:15, 15:03:30, 16:03:45, 17:04:00, 18:04:15, 19:04:30, 20:04:45, 21:05:00, 22:05:15, 23:05:30, 24:05:45, 25:06:00, 26:06:15, 27:06:30, 28:06:45, 29:07:00, 30:07:15, 31:07:30, 32:07:45, 33:08:00, 34:08:15, 35:08:30, 36:08:45, 37:09:00, 38:09:15, 39:09:30, 40:09:45, 41:10:00, 42:10:15, 43:10:30, 44:10:45, 45:11:00, 46:11:15, 47:11:30, 48:11:45, 49:12:00, 50:12:15, 51:12:30, 52:12:45, 53:13:00, 54:13:15, 55:13:30, 56:13:45, 57:14:00, 58:14:15, 59:14:30, 60:14:45, 61:15:00, 62:15:15, 63:15:30, 64:15:45, 65:16:00, 66:16:15, 67:16:30, 68:16:45, 69:17:00, 70:17:15, 71:17:30, 72:17:45, 73:18:00, 74:18:15, 75:18:30, 76:18:45, 77:19:00, 78:19:15, 79:19:30, 80:19:45, 81:20:00, 82:20:15, 83:20:30, 84:20:45, 85:21:00, 86:21:15, 87:21:30, 88:21:45, 89:22:00, 90:22:15, 91:22:30, 92:22:45, 93:23:00, 94:23:15, 95:23:30, 96:23:45

[122] [activity\\_56: From <font color="maroon">%activity\\_55%</font>, what did you do?](#)

Categories: 1:Selling products and/or services in a shop, for self or household member, 2:Selling products and/or services door-to-door, for self or household member, 3:Sourcing and transporting products for trade e.g. day-old chicks, semen straws, feed, drugs etc, 4:Value -addition to the traded product e.g. processing meat, caring for the incubation process, grading etc, 5:Cleaning equipment and premises, 6:Communicating with suppliers, 7:Business group meetings (SACCO or ROSCA meetings, etc), 8:Business or self-employment activities (other than the agri-enterprise) for self or household member, 9:Work as employed, 10:Going to the bank, 11:Bookkeeping, 18:Sleeping and resting, 13:Eating and drinking, 14:Personal care, 15:School (incl. homework), 16:Cooking, 17:Domestic work (incl. fetching water, fuel), 12:Caring for children, 19:Caring for adults (sick, elderly), 20:Commuting (to/from work or school), 21:Traveling (not for work or school), 22:Exercising, 23:Social activities and hobbies, 24:Religious activities, 25:Weaving / sewing / textile care, 26:Farming, crop cultivation,, 27:Livestock raising (cattle, poultry, sheep, etc.), 28:Shopping / getting service (incl. health services), 29:Horticulture

[123] [endtime\\_56: Until what time? <font color="maroon">\(%hrs\\_56% hours %min\\_56% minutes\)</font>](#)

Categories: 1:00:00, 2:00:15, 3:00:30, 4:00:45, 5:01:00, 6:01:15, 7:01:30, 8:01:45, 9:02:00, 10:02:15, 11:02:30, 12:02:45, 13:03:00, 14:03:15, 15:03:30, 16:03:45, 17:04:00, 18:04:15, 19:04:30, 20:04:45, 21:05:00, 22:05:15, 23:05:30, 24:05:45, 25:06:00, 26:06:15, 27:06:30, 28:06:45, 29:07:00, 30:07:15, 31:07:30, 32:07:45, 33:08:00, 34:08:15, 35:08:30, 36:08:45, 37:09:00, 38:09:15, 39:09:30, 40:09:45, 41:10:00, 42:10:15, 43:10:30, 44:10:45, 45:11:00, 46:11:15, 47:11:30, 48:11:45, 49:12:00, 50:12:15, 51:12:30, 52:12:45, 53:13:00, 54:13:15, 55:13:30, 56:13:45, 57:14:00, 58:14:15, 59:14:30, 60:14:45, 61:15:00, 62:15:15, 63:15:30, 64:15:45, 65:16:00, 66:16:15, 67:16:30, 68:16:45, 69:17:00, 70:17:15, 71:17:30, 72:17:45, 73:18:00, 74:18:15, 75:18:30, 76:18:45, 77:19:00, 78:19:15, 79:19:30, 80:19:45, 81:20:00, 82:20:15, 83:20:30, 84:20:45, 85:21:00, 86:21:15, 87:21:30, 88:21:45, 89:22:00, 90:22:15, 91:22:30, 92:22:45, 93:23:00, 94:23:15, 95:23:30, 96:23:45

[124] [activity\\_57: From <font color="maroon">%activity\\_56%</font>, what did you do?](#)

Categories: 1:Selling products and/or services in a shop, for self or household member, 2:Selling products and/or services door-to-door, for self or household member, 3:Sourcing and transporting products for trade e.g. day-old chicks, semen straws, feed, drugs etc, 4:Value -addition to the traded product e.g. processing meat, caring for the incubation process, grading etc, 5:Cleaning equipment and premises, 6:Communicating with suppliers, 7:Business group meetings (SACCO or ROSCA meetings, etc), 8:Business or self-employment activities (other than the agri-enterprise) for self or household member, 9:Work as employed, 10:Going to the bank, 11:Bookkeeping, 18:Sleeping and resting, 13:Eating and drinking, 14:Personal care, 15:School (incl. homework), 16:Cooking, 17:Domestic work (incl. fetching water, fuel), 12:Caring for children, 19:Caring for adults (sick, elderly), 20:Commuting (to/from work or school), 21:Traveling (not for work or school), 22:Exercising, 23:Social activities and hobbies, 24:Religious activities, 25:Weaving / sewing / textile care, 26:Farming, crop cultivation,, 27:Livestock raising (cattle, poultry, sheep, etc.), 28:Shopping / getting service (incl. health services), 29:Horticulture

[125] [endtime\\_57: Until what time? <font color="maroon">\(%hrs\\_57% hours %min\\_57% minutes\)</font>](#)

Categories: 1:00:00, 2:00:15, 3:00:30, 4:00:45, 5:01:00, 6:01:15, 7:01:30, 8:01:45, 9:02:00, 10:02:15, 11:02:30, 12:02:45, 13:03:00, 14:03:15, 15:03:30, 16:03:45, 17:04:00, 18:04:15, 19:04:30, 20:04:45, 21:05:00, 22:05:15, 23:05:30, 24:05:45, 25:06:00, 26:06:15, 27:06:30, 28:06:45, 29:07:00, 30:07:15, 31:07:30, 32:07:45, 33:08:00, 34:08:15, 35:08:30, 36:08:45, 37:09:00, 38:09:15, 39:09:30, 40:09:45, 41:10:00, 42:10:15, 43:10:30, 44:10:45, 45:11:00, 46:11:15, 47:11:30, 48:11:45, 49:12:00, 50:12:15, 51:12:30, 52:12:45, 53:13:00, 54:13:15, 55:13:30, 56:13:45, 57:14:00, 58:14:15, 59:14:30, 60:14:45, 61:15:00, 62:15:15, 63:15:30, 64:15:45, 65:16:00, 66:16:15, 67:16:30, 68:16:45, 69:17:00, 70:17:15, 71:17:30, 72:17:45, 73:18:00, 74:18:15, 75:18:30, 76:18:45, 77:19:00, 78:19:15, 79:19:30, 80:19:45, 81:20:00, 82:20:15, 83:20:30, 84:20:45, 85:21:00, 86:21:15, 87:21:30, 88:21:45, 89:22:00, 90:22:15, 91:22:30, 92:22:45, 93:23:00, 94:23:15, 95:23:30, 96:23:45

[126] [activity\\_58: From <font color="maroon">%activity\\_57%</font>, what did you do?](#)

Categories: 1:Selling products and/or services in a shop, for self or household member, 2:Selling products and/or services door-to-door, for self or household member, 3:Sourcing and transporting products for trade e.g. day-old chicks, semen straws, feed, drugs etc, 4:Value -addition to the traded product e.g. processing meat, caring for the incubation process, grading etc, 5:Cleaning equipment and premises, 6:Communicating with suppliers, 7:Business group meetings (SACCO or ROSCA meetings, etc), 8:Business or self-employment activities (other than the agri-enterprise) for self or household member, 9:Work as employed, 10:Going to the bank, 11:Bookkeeping, 18:Sleeping and resting, 13:Eating and drinking, 14:Personal care, 15:School (incl. homework), 16:Cooking, 17:Domestic work (incl. fetching water, fuel), 12:Caring for children, 19:Caring for adults (sick, elderly), 20:Commuting (to/from work or school), 21:Traveling (not for work or school), 22:Exercising, 23:Social activities and hobbies, 24:Religious activities, 25:Weaving / sewing / textile care,

26:Farming, crop cultivation,, 27:Livestock raising (cattle, poultry, sheep, etc.), 28:Shopping / getting service (incl. health services), 29:Horticulture

[127] [endtime\\_58: Until what time? <font color="maroon">\(%hrs\\_58% hours %min\\_58% minutes\)</font>](#)

Categories: 1:00:00, 2:00:15, 3:00:30, 4:00:45, 5:01:00, 6:01:15, 7:01:30, 8:01:45, 9:02:00, 10:02:15, 11:02:30, 12:02:45, 13:03:00, 14:03:15, 15:03:30, 16:03:45, 17:04:00, 18:04:15, 19:04:30, 20:04:45, 21:05:00, 22:05:15, 23:05:30, 24:05:45, 25:06:00, 26:06:15, 27:06:30, 28:06:45, 29:07:00, 30:07:15, 31:07:30, 32:07:45, 33:08:00, 34:08:15, 35:08:30, 36:08:45, 37:09:00, 38:09:15, 39:09:30, 40:09:45, 41:10:00, 42:10:15, 43:10:30, 44:10:45, 45:11:00, 46:11:15, 47:11:30, 48:11:45, 49:12:00, 50:12:15, 51:12:30, 52:12:45, 53:13:00, 54:13:15, 55:13:30, 56:13:45, 57:14:00, 58:14:15, 59:14:30, 60:14:45, 61:15:00, 62:15:15, 63:15:30, 64:15:45, 65:16:00, 66:16:15, 67:16:30, 68:16:45, 69:17:00, 70:17:15, 71:17:30, 72:17:45, 73:18:00, 74:18:15, 75:18:30, 76:18:45, 77:19:00, 78:19:15, 79:19:30, 80:19:45, 81:20:00, 82:20:15, 83:20:30, 84:20:45, 85:21:00, 86:21:15, 87:21:30, 88:21:45, 89:22:00, 90:22:15, 91:22:30, 92:22:45, 93:23:00, 94:23:15, 95:23:30, 96:23:45

[128] [activity\\_59: From <font color="maroon">%activity\\_58%</font>, what did you do?](#)

Categories: 1:Selling products and/or services in a shop, for self or household member, 2:Selling products and/or services door-to-door, for self or household member, 3:Sourcing and transporting products for trade e.g. day-old chicks, semen straws, feed, drugs etc, 4:Value -addition to the traded product e.g. processing meat, caring for the incubation process, grading etc, 5:Cleaning equipment and premises, 6:Communicating with suppliers, 7:Business group meetings (SACCO or ROSCA meetings, etc), 8:Business or self-employment activities (other than the agri-enterprise) for self or household member, 9:Work as employed, 10:Going to the bank, 11:Bookkeeping, 18:Sleeping and resting, 13:Eating and drinking, 14:Personal care, 15:School (incl. homework), 16:Cooking, 17:Domestic work (incl. fetching water, fuel), 12:Caring for children, 19:Caring for adults (sick, elderly), 20:Commuting (to/from work or school), 21:Traveling (not for work or school), 22:Exercising, 23:Social activities and hobbies, 24:Religious activities, 25:Weaving / sewing / textile care, 26:Farming, crop cultivation,, 27:Livestock raising (cattle, poultry, sheep, etc.), 28:Shopping / getting service (incl. health services), 29:Horticulture

[129] [endtime\\_59: Until what time? <font color="maroon">\(%hrs\\_59% hours %min\\_59% minutes\)</font>](#)

Categories: 1:00:00, 2:00:15, 3:00:30, 4:00:45, 5:01:00, 6:01:15, 7:01:30, 8:01:45, 9:02:00, 10:02:15, 11:02:30, 12:02:45, 13:03:00, 14:03:15, 15:03:30, 16:03:45, 17:04:00, 18:04:15, 19:04:30, 20:04:45, 21:05:00, 22:05:15, 23:05:30, 24:05:45, 25:06:00, 26:06:15, 27:06:30, 28:06:45, 29:07:00, 30:07:15, 31:07:30, 32:07:45, 33:08:00, 34:08:15, 35:08:30, 36:08:45, 37:09:00, 38:09:15, 39:09:30, 40:09:45, 41:10:00, 42:10:15, 43:10:30, 44:10:45, 45:11:00, 46:11:15, 47:11:30, 48:11:45, 49:12:00, 50:12:15, 51:12:30, 52:12:45, 53:13:00, 54:13:15, 55:13:30, 56:13:45, 57:14:00, 58:14:15, 59:14:30, 60:14:45, 61:15:00, 62:15:15, 63:15:30, 64:15:45, 65:16:00, 66:16:15, 67:16:30, 68:16:45, 69:17:00, 70:17:15, 71:17:30, 72:17:45, 73:18:00, 74:18:15, 75:18:30, 76:18:45, 77:19:00, 78:19:15, 79:19:30, 80:19:45, 81:20:00, 82:20:15, 83:20:30, 84:20:45, 85:21:00, 86:21:15, 87:21:30, 88:21:45, 89:22:00, 90:22:15, 91:22:30, 92:22:45, 93:23:00, 94:23:15, 95:23:30, 96:23:45

[130] [activity\\_60: From <font color="maroon">%activity\\_59%</font>, what did you do?](#)

Categories: 1:Selling products and/or services in a shop, for self or household member, 2:Selling products and/or services door-to-door, for self or household member, 3:Sourcing and transporting products for trade e.g. day-old chicks, semen straws, feed, drugs etc, 4:Value -addition to the traded product e.g. processing meat, caring for the incubation process, grading etc, 5:Cleaning equipment and premises, 6:Communicating with suppliers, 7:Business group meetings (SACCO or ROSCA meetings, etc), 8:Business or self-employment activities (other than the agri-enterprise) for self or household member, 9:Work as employed, 10:Going to the bank, 11:Bookkeeping, 18:Sleeping and resting, 13:Eating and drinking, 14:Personal care, 15:School (incl. homework), 16:Cooking, 17:Domestic work (incl. fetching water, fuel), 12:Caring for children, 19:Caring for adults (sick, elderly), 20:Commuting (to/from work or school), 21:Traveling (not for work or school), 22:Exercising, 23:Social activities and hobbies, 24:Religious activities, 25:Weaving / sewing / textile care, 26:Farming, crop cultivation,, 27:Livestock raising (cattle, poultry, sheep, etc.), 28:Shopping / getting service (incl. health services), 29:Horticulture

[131] [endtime\\_60: Until what time? <font color="maroon">\(%hrs\\_24% hours %min\\_24% minutes\)</font>](#)

Categories: 1:00:00, 2:00:15, 3:00:30, 4:00:45, 5:01:00, 6:01:15, 7:01:30, 8:01:45, 9:02:00, 10:02:15, 11:02:30, 12:02:45, 13:03:00, 14:03:15, 15:03:30, 16:03:45, 17:04:00, 18:04:15, 19:04:30, 20:04:45, 21:05:00, 22:05:15, 23:05:30, 24:05:45, 25:06:00, 26:06:15, 27:06:30, 28:06:45, 29:07:00, 30:07:15, 31:07:30, 32:07:45, 33:08:00, 34:08:15, 35:08:30, 36:08:45, 37:09:00, 38:09:15, 39:09:30, 40:09:45, 41:10:00, 42:10:15, 43:10:30, 44:10:45, 45:11:00, 46:11:15, 47:11:30, 48:11:45, 49:12:00, 50:12:15, 51:12:30, 52:12:45, 53:13:00, 54:13:15, 55:13:30, 56:13:45, 57:14:00, 58:14:15, 59:14:30, 60:14:45, 61:15:00, 62:15:15, 63:15:30, 64:15:45, 65:16:00, 66:16:15, 67:16:30, 68:16:45, 69:17:00, 70:17:15, 71:17:30, 72:17:45, 73:18:00, 74:18:15, 75:18:30, 76:18:45, 77:19:00, 78:19:15, 79:19:30, 80:19:45, 81:20:00, 82:20:15, 83:20:30, 84:20:45, 85:21:00, 86:21:15, 87:21:30, 88:21:45, 89:22:00, 90:22:15, 91:22:30, 92:22:45, 93:23:00, 94:23:15, 95:23:30, 96:23:45

[132] [wake\\_s: O1. Yesterday, what time did you wake\\_s up?](#)

Categories: 1:00:00, 2:00:15, 3:00:30, 4:00:45, 5:01:00, 6:01:15, 7:01:30, 8:01:45, 9:02:00, 10:02:15, 11:02:30, 12:02:45, 13:03:00, 14:03:15, 15:03:30, 16:03:45, 17:04:00, 18:04:15, 19:04:30, 20:04:45, 21:05:00, 22:05:15, 23:05:30, 24:05:45, 25:06:00, 26:06:15, 27:06:30, 28:06:45, 29:07:00, 30:07:15, 31:07:30, 32:07:45, 33:08:00, 34:08:15, 35:08:30, 36:08:45, 37:09:00, 38:09:15, 39:09:30, 40:09:45, 41:10:00, 42:10:15, 43:10:30, 44:10:45, 45:11:00, 46:11:15, 47:11:30, 48:11:45, 49:12:00, 50:12:15, 51:12:30, 52:12:45, 53:13:00, 54:13:15, 55:13:30, 56:13:45, 57:14:00, 58:14:15, 59:14:30, 60:14:45, 61:15:00, 62:15:15, 63:15:30, 64:15:45, 65:16:00, 66:16:15, 67:16:30, 68:16:45, 69:17:00, 70:17:15, 71:17:30, 72:17:45, 73:18:00, 74:18:15, 75:18:30, 76:18:45, 77:19:00, 78:19:15, 79:19:30, 80:19:45, 81:20:00, 82:20:15, 83:20:30, 84:20:45, 85:21:00, 86:21:15, 87:21:30, 88:21:45, 89:22:00, 90:22:15, 91:22:30, 92:22:45, 93:23:00, 94:23:15, 95:23:30, 96:23:45

[133] [sleep\\_s: O2. Yesterday, what time did you go to sleep\\_s?](#)

Categories: 1:00:00, 2:00:15, 3:00:30, 4:00:45, 5:01:00, 6:01:15, 7:01:30, 8:01:45, 9:02:00, 10:02:15, 11:02:30, 12:02:45, 13:03:00, 14:03:15, 15:03:30, 16:03:45, 17:04:00, 18:04:15, 19:04:30, 20:04:45, 21:05:00, 22:05:15, 23:05:30, 24:05:45, 25:06:00, 26:06:15, 27:06:30, 28:06:45, 29:07:00, 30:07:15, 31:07:30, 32:07:45, 33:08:00, 34:08:15, 35:08:30, 36:08:45, 37:09:00, 38:09:15, 39:09:30, 40:09:45, 41:10:00, 42:10:15, 43:10:30, 44:10:45, 45:11:00, 46:11:15, 47:11:30, 48:11:45, 49:12:00, 50:12:15, 51:12:30, 52:12:45, 53:13:00, 54:13:15, 55:13:30, 56:13:45, 57:14:00, 58:14:15, 59:14:30, 60:14:45, 61:15:00, 62:15:15, 63:15:30, 64:15:45, 65:16:00, 66:16:15, 67:16:30, 68:16:45, 69:17:00, 70:17:15, 71:17:30, 72:17:45, 73:18:00, 74:18:15, 75:18:30, 76:18:45, 77:19:00, 78:19:15, 79:19:30, 80:19:45, 81:20:00, 82:20:15, 83:20:30, 84:20:45, 85:21:00, 86:21:15, 87:21:30, 88:21:45, 89:22:00, 90:22:15, 91:22:30, 92:22:45, 93:23:00, 94:23:15, 95:23:30, 96:23:45

[134] [activity\\_1\\_s: From <font color="maroon">%wake\\_s%</font>, what did you do?](#)

Categories: 1:Selling products and/or services in a shop, for self or household member, 2:Selling products and/or services door-to-door, for self or household member, 3:Sourcing and transporting products for trade e.g. day-old chicks, semen straws, feed, drugs etc, 4:Value -addition to the traded product e.g. processing meat, caring for the incubation process, grading etc, 5:Cleaning equipment and premises, 6:Communicating with suppliers, 7:Business group meetings (SACCO or ROSCA meetings, etc), 8:Business or self-employment activities (other than the agri-enterprise) for self or household member, 9:Work as employed, 10:Going to the bank, 11:Bookkeeping, 18:Sleeping and resting, 13:Eating and drinking, 14:Personal care, 15:School (incl. homework), 16:Cooking, 17:Domestic work (incl. fetching water, fuel), 12:Caring for children, 19:Caring for adults (sick, elderly), 20:Commuting (to/from work or school), 21:Traveling (not for work or school), 22:Exercising, 23:Social activities and hobbies, 24:Religious activities, 25:Weaving / sewing / textile care, 26:Farming, crop cultivation,, 27:Livestock raising (cattle, poultry, sheep, etc.), 28:Shopping / getting service (incl. health services), 29:Horticulture

[135] [endtime\\_1\\_s: Until what time? <font color="maroon">\(%hrs\\_1\\_s% hours %min\\_1\\_s% minutes\)</font>](#)

Categories: 1:00:00, 2:00:15, 3:00:30, 4:00:45, 5:01:00, 6:01:15, 7:01:30, 8:01:45, 9:02:00, 10:02:15, 11:02:30, 12:02:45, 13:03:00, 14:03:15, 15:03:30, 16:03:45, 17:04:00, 18:04:15, 19:04:30, 20:04:45, 21:05:00, 22:05:15, 23:05:30, 24:05:45, 25:06:00, 26:06:15, 27:06:30, 28:06:45, 29:07:00, 30:07:15, 31:07:30, 32:07:45, 33:08:00, 34:08:15, 35:08:30, 36:08:45, 37:09:00, 38:09:15, 39:09:30, 40:09:45, 41:10:00, 42:10:15, 43:10:30, 44:10:45, 45:11:00, 46:11:15, 47:11:30, 48:11:45, 49:12:00, 50:12:15, 51:12:30, 52:12:45, 53:13:00, 54:13:15, 55:13:30, 56:13:45, 57:14:00, 58:14:15, 59:14:30, 60:14:45, 61:15:00, 62:15:15, 63:15:30, 64:15:45, 65:16:00, 66:16:15, 67:16:30, 68:16:45, 69:17:00, 70:17:15, 71:17:30, 72:17:45, 73:18:00, 74:18:15, 75:18:30, 76:18:45, 77:19:00, 78:19:15, 79:19:30, 80:19:45, 81:20:00, 82:20:15, 83:20:30, 84:20:45, 85:21:00, 86:21:15, 87:21:30, 88:21:45, 89:22:00, 90:22:15, 91:22:30, 92:22:45, 93:23:00, 94:23:15, 95:23:30, 96:23:45

[136] [activity\\_2\\_s: From <font color="maroon">%activity\\_1\\_s%</font>, what did you do?](#)

Categories: 1:Selling products and/or services in a shop, for self or household member, 2:Selling products and/or services door-to-door, for self or household member, 3:Sourcing and transporting products for trade e.g. day-old chicks, semen straws, feed, drugs etc, 4:Value -addition to the traded product e.g. processing meat, caring for the incubation process, grading etc, 5:Cleaning equipment and premises, 6:Communicating with suppliers, 7:Business group meetings (SACCO or ROSCA meetings, etc), 8:Business or self-employment activities (other than the agri-enterprise) for self or household member, 9:Work as employed, 10:Going to the bank, 11:Bookkeeping, 18:Sleeping and resting, 13:Eating and drinking, 14:Personal care, 15:School (incl. homework), 16:Cooking, 17:Domestic work (incl. fetching water, fuel), 12:Caring for children, 19:Caring for adults (sick, elderly), 20:Commuting (to/from work or school), 21:Traveling (not for work or school), 22:Exercising, 23:Social activities and hobbies, 24:Religious activities, 25:Weaving / sewing / textile care, 26:Farming, crop cultivation,, 27:Livestock raising (cattle, poultry, sheep, etc.), 28:Shopping / getting service (incl. health services), 29:Horticulture

[137] [endtime\\_2\\_s: Until what time? <font color="maroon">\(%hrs\\_2\\_s% hours %min\\_2\\_s% minutes\)</font>](#)

Categories: 1:00:00, 2:00:15, 3:00:30, 4:00:45, 5:01:00, 6:01:15, 7:01:30, 8:01:45, 9:02:00, 10:02:15, 11:02:30, 12:02:45, 13:03:00, 14:03:15, 15:03:30, 16:03:45, 17:04:00, 18:04:15, 19:04:30, 20:04:45, 21:05:00, 22:05:15, 23:05:30, 24:05:45, 25:06:00, 26:06:15, 27:06:30, 28:06:45, 29:07:00, 30:07:15, 31:07:30, 32:07:45, 33:08:00, 34:08:15, 35:08:30, 36:08:45, 37:09:00, 38:09:15, 39:09:30, 40:09:45, 41:10:00, 42:10:15, 43:10:30, 44:10:45, 45:11:00, 46:11:15, 47:11:30, 48:11:45, 49:12:00, 50:12:15, 51:12:30, 52:12:45, 53:13:00, 54:13:15, 55:13:30, 56:13:45, 57:14:00, 58:14:15, 59:14:30, 60:14:45, 61:15:00, 62:15:15, 63:15:30, 64:15:45, 65:16:00, 66:16:15, 67:16:30, 68:16:45, 69:17:00, 70:17:15, 71:17:30, 72:17:45, 73:18:00, 74:18:15, 75:18:30, 76:18:45, 77:19:00, 78:19:15, 79:19:30, 80:19:45, 81:20:00, 82:20:15, 83:20:30, 84:20:45, 85:21:00, 86:21:15, 87:21:30, 88:21:45, 89:22:00, 90:22:15, 91:22:30, 92:22:45, 93:23:00, 94:23:15, 95:23:30, 96:23:45

[138] [activity\\_3\\_s: From <font color="maroon">%activity\\_2\\_s%</font>, what did you do?](#)

Categories: 1:Selling products and/or services in a shop, for self or household member, 2:Selling products and/or services door-to-door, for self or household member, 3:Sourcing and transporting products for trade e.g. day-old chicks, semen straws, feed, drugs etc, 4:Value -addition to the traded product e.g. processing meat, caring for the incubation process, grading etc, 5:Cleaning equipment and premises, 6:Communicating with suppliers, 7:Business group meetings (SACCO or ROSCA meetings, etc), 8:Business or self-employment activities (other than the agri-enterprise) for self or household member, 9:Work as employed, 10:Going to the bank, 11:Bookkeeping, 18:Sleeping and resting, 13:Eating and drinking, 14:Personal care, 15:School (incl. homework), 16:Cooking, 17:Domestic work (incl. fetching water, fuel), 12:Caring for children, 19:Caring for adults (sick, elderly), 20:Commuting (to/from work or school), 21:Traveling (not for work or school), 22:Exercising, 23:Social activities and hobbies, 24:Religious activities, 25:Weaving / sewing / textile care, 26:Farming, crop cultivation,, 27:Livestock raising (cattle, poultry, sheep, etc.), 28:Shopping / getting service (incl. health services), 29:Horticulture

[139] [endtime\\_3\\_s: Until what time? <font color="maroon">\(%hrs\\_3\\_s% hours %min\\_3\\_s% minutes\)</font>](#)

Categories: 1:00:00, 2:00:15, 3:00:30, 4:00:45, 5:01:00, 6:01:15, 7:01:30, 8:01:45, 9:02:00, 10:02:15, 11:02:30, 12:02:45, 13:03:00, 14:03:15, 15:03:30, 16:03:45, 17:04:00, 18:04:15, 19:04:30, 20:04:45, 21:05:00, 22:05:15, 23:05:30, 24:05:45, 25:06:00, 26:06:15, 27:06:30, 28:06:45, 29:07:00, 30:07:15, 31:07:30, 32:07:45, 33:08:00, 34:08:15, 35:08:30, 36:08:45, 37:09:00, 38:09:15, 39:09:30, 40:09:45, 41:10:00, 42:10:15, 43:10:30, 44:10:45, 45:11:00, 46:11:15, 47:11:30, 48:11:45, 49:12:00, 50:12:15, 51:12:30, 52:12:45, 53:13:00, 54:13:15, 55:13:30, 56:13:45, 57:14:00, 58:14:15, 59:14:30, 60:14:45, 61:15:00, 62:15:15, 63:15:30, 64:15:45, 65:16:00, 66:16:15, 67:16:30, 68:16:45, 69:17:00, 70:17:15, 71:17:30, 72:17:45, 73:18:00, 74:18:15, 75:18:30, 76:18:45, 77:19:00, 78:19:15, 79:19:30, 80:19:45, 81:20:00, 82:20:15, 83:20:30, 84:20:45, 85:21:00, 86:21:15, 87:21:30, 88:21:45, 89:22:00, 90:22:15, 91:22:30, 92:22:45, 93:23:00, 94:23:15, 95:23:30, 96:23:45

[140] [activity\\_4\\_s: From <font color="maroon">%activity\\_3\\_s%</font>, what did you do?](#)

Categories: 1:Selling products and/or services in a shop, for self or household member, 2:Selling products and/or services door-to-door, for self or household member, 3:Sourcing and transporting products for trade e.g. day-old chicks, semen straws, feed, drugs etc, 4:Value -addition to the traded product e.g. processing meat, caring for the incubation process, grading etc, 5:Cleaning equipment and premises, 6:Communicating with suppliers, 7:Business group meetings (SACCO or ROSCA meetings, etc), 8:Business or self-employment activities (other than the agri-enterprise) for self or household member, 9:Work as employed, 10:Going to the bank, 11:Bookkeeping, 18:Sleeping and resting, 13:Eating and drinking, 14:Personal care, 15:School (incl. homework), 16:Cooking, 17:Domestic work (incl. fetching water, fuel), 12:Caring for children, 19:Caring for adults (sick, elderly), 20:Commuting (to/from work or school), 21:Traveling (not for work or school), 22:Exercising, 23:Social activities and hobbies, 24:Religious activities, 25:Weaving / sewing / textile care, 26:Farming, crop cultivation,, 27:Livestock raising (cattle, poultry, sheep, etc.), 28:Shopping / getting service (incl. health services), 29:Horticulture

[141] [endtime\\_4\\_s: Until what time? <font color="maroon">\(%hrs\\_4\\_s% hours %min\\_4\\_s% minutes\)</font>](#)

Categories: 1:00:00, 2:00:15, 3:00:30, 4:00:45, 5:01:00, 6:01:15, 7:01:30, 8:01:45, 9:02:00, 10:02:15, 11:02:30, 12:02:45, 13:03:00, 14:03:15, 15:03:30, 16:03:45, 17:04:00, 18:04:15, 19:04:30, 20:04:45, 21:05:00, 22:05:15, 23:05:30, 24:05:45, 25:06:00, 26:06:15, 27:06:30, 28:06:45, 29:07:00, 30:07:15, 31:07:30, 32:07:45, 33:08:00, 34:08:15, 35:08:30, 36:08:45, 37:09:00, 38:09:15, 39:09:30, 40:09:45, 41:10:00, 42:10:15, 43:10:30, 44:10:45, 45:11:00, 46:11:15, 47:11:30, 48:11:45, 49:12:00, 50:12:15, 51:12:30, 52:12:45, 53:13:00, 54:13:15, 55:13:30, 56:13:45, 57:14:00, 58:14:15, 59:14:30, 60:14:45, 61:15:00, 62:15:15, 63:15:30, 64:15:45, 65:16:00, 66:16:15, 67:16:30, 68:16:45, 69:17:00, 70:17:15, 71:17:30, 72:17:45, 73:18:00, 74:18:15, 75:18:30, 76:18:45, 77:19:00, 78:19:15, 79:19:30, 80:19:45, 81:20:00, 82:20:15, 83:20:30, 84:20:45, 85:21:00, 86:21:15, 87:21:30, 88:21:45, 89:22:00, 90:22:15, 91:22:30, 92:22:45, 93:23:00, 94:23:15, 95:23:30, 96:23:45

[142] [activity\\_5\\_s: From <font color="maroon">%activity\\_4\\_s%</font>, what did you do?](#)

Categories: 1:Selling products and/or services in a shop, for self or household member, 2:Selling products and/or services door-to-door, for self or household member, 3:Sourcing and transporting products for trade e.g. day-old chicks, semen straws, feed, drugs etc, 4:Value -addition to the traded product e.g. processing meat, caring for the incubation process, grading etc, 5:Cleaning equipment and premises, 6:Communicating with suppliers, 7:Business group meetings (SACCO or ROSCA meetings, etc), 8:Business or self-employment activities (other than the agri-enterprise) for self or household member, 9:Work as employed, 10:Going to the bank, 11:Bookkeeping, 18:Sleeping and resting, 13:Eating and drinking, 14:Personal care, 15:School (incl. homework), 16:Cooking, 17:Domestic work (incl. fetching water, fuel), 12:Caring for children, 19:Caring for adults (sick, elderly), 20:Commuting (to/from work or school), 21:Traveling (not for work or school), 22:Exercising, 23:Social activities and hobbies, 24:Religious activities, 25:Weaving / sewing / textile care, 26:Farming, crop cultivation,, 27:Livestock raising (cattle, poultry, sheep, etc.), 28:Shopping / getting service (incl. health services), 29:Horticulture

[143] [endtime\\_5\\_s: Until what time? <font color="maroon">\(%hrs\\_5\\_s% hours %min\\_5\\_s% minutes\)</font>](#)

Categories: 1:00:00, 2:00:15, 3:00:30, 4:00:45, 5:01:00, 6:01:15, 7:01:30, 8:01:45, 9:02:00, 10:02:15, 11:02:30, 12:02:45, 13:03:00, 14:03:15, 15:03:30, 16:03:45, 17:04:00, 18:04:15, 19:04:30, 20:04:45, 21:05:00, 22:05:15, 23:05:30, 24:05:45, 25:06:00, 26:06:15, 27:06:30, 28:06:45, 29:07:00, 30:07:15, 31:07:30, 32:07:45, 33:08:00, 34:08:15, 35:08:30, 36:08:45, 37:09:00, 38:09:15, 39:09:30, 40:09:45, 41:10:00, 42:10:15, 43:10:30, 44:10:45, 45:11:00, 46:11:15, 47:11:30, 48:11:45, 49:12:00, 50:12:15, 51:12:30, 52:12:45, 53:13:00, 54:13:15, 55:13:30, 56:13:45, 57:14:00, 58:14:15, 59:14:30, 60:14:45, 61:15:00, 62:15:15, 63:15:30, 64:15:45, 65:16:00, 66:16:15, 67:16:30, 68:16:45, 69:17:00, 70:17:15, 71:17:30, 72:17:45, 73:18:00, 74:18:15, 75:18:30, 76:18:45, 77:19:00, 78:19:15, 79:19:30, 80:19:45, 81:20:00, 82:20:15, 83:20:30, 84:20:45, 85:21:00, 86:21:15, 87:21:30, 88:21:45, 89:22:00, 90:22:15, 91:22:30, 92:22:45, 93:23:00, 94:23:15, 95:23:30, 96:23:45

[144] [activity\\_6\\_s: From <font color="maroon">%activity\\_5\\_s%</font>, what did you do?](#)

Categories: 1:Selling products and/or services in a shop, for self or household member, 2:Selling products and/or services door-to-door, for self or household member, 3:Sourcing and transporting products for trade e.g. day-old chicks, semen straws, feed, drugs etc, 4:Value -addition to the traded product e.g. processing meat, caring for the incubation process, grading etc, 5:Cleaning equipment and premises, 6:Communicating with suppliers, 7:Business group meetings (SACCO or ROSCA meetings, etc), 8:Business or self-employment activities (other than the agri-enterprise) for self or household member, 9:Work as employed, 10:Going to the bank, 11:Bookkeeping, 18:Sleeping and resting, 13:Eating and drinking, 14:Personal care, 15:School (incl. homework), 16:Cooking, 17:Domestic work (incl. fetching water, fuel), 12:Caring for children, 19:Caring for adults (sick, elderly), 20:Commuting (to/from work or school), 21:Traveling (not for work or school), 22:Exercising, 23:Social activities and hobbies, 24:Religious activities, 25:Weaving / sewing / textile care, 26:Farming, crop cultivation,, 27:Livestock raising (cattle, poultry, sheep, etc.), 28:Shopping / getting service (incl. health services), 29:Horticulture

[145] [endtime\\_6\\_s: Until what time? <font color="maroon">\(%hrs\\_6\\_s% hours %min\\_6\\_s% minutes\)</font>](#)

Categories: 1:00:00, 2:00:15, 3:00:30, 4:00:45, 5:01:00, 6:01:15, 7:01:30, 8:01:45, 9:02:00, 10:02:15, 11:02:30, 12:02:45, 13:03:00, 14:03:15, 15:03:30, 16:03:45, 17:04:00, 18:04:15, 19:04:30, 20:04:45, 21:05:00, 22:05:15, 23:05:30, 24:05:45, 25:06:00, 26:06:15, 27:06:30, 28:06:45, 29:07:00, 30:07:15, 31:07:30, 32:07:45, 33:08:00, 34:08:15, 35:08:30, 36:08:45, 37:09:00, 38:09:15, 39:09:30, 40:09:45, 41:10:00, 42:10:15, 43:10:30, 44:10:45, 45:11:00, 46:11:15, 47:11:30, 48:11:45, 49:12:00, 50:12:15, 51:12:30, 52:12:45, 53:13:00, 54:13:15, 55:13:30, 56:13:45, 57:14:00, 58:14:15, 59:14:30, 60:14:45, 61:15:00, 62:15:15, 63:15:30, 64:15:45, 65:16:00, 66:16:15, 67:16:30, 68:16:45, 69:17:00, 70:17:15, 71:17:30, 72:17:45, 73:18:00, 74:18:15, 75:18:30, 76:18:45, 77:19:00, 78:19:15, 79:19:30, 80:19:45, 81:20:00, 82:20:15, 83:20:30, 84:20:45, 85:21:00, 86:21:15, 87:21:30, 88:21:45, 89:22:00, 90:22:15, 91:22:30, 92:22:45, 93:23:00, 94:23:15, 95:23:30, 96:23:45

[146] [activity\\_7\\_s: From <font color="maroon">%activity\\_6\\_s%</font>, what did you do?](#)

Categories: 1:Selling products and/or services in a shop, for self or household member, 2:Selling products and/or services door-to-door, for self or household member, 3:Sourcing and transporting products for trade e.g. day-old chicks, semen straws, feed, drugs etc, 4:Value -addition to the traded product e.g. processing meat, caring for the incubation process, grading etc, 5:Cleaning equipment and premises, 6:Communicating with suppliers, 7:Business group meetings (SACCO or ROSCA meetings, etc), 8:Business or self-employment activities (other than the agri-enterprise) for self or household member, 9:Work as employed, 10:Going to the bank, 11:Bookkeeping, 18:Sleeping and resting, 13:Eating and drinking, 14:Personal care, 15:School (incl. homework), 16:Cooking, 17:Domestic work (incl. fetching water, fuel), 12:Caring for children, 19:Caring for adults (sick, elderly), 20:Commuting (to/from work or school), 21:Traveling (not for work or school), 22:Exercising, 23:Social activities and hobbies, 24:Religious activities, 25:Weaving / sewing / textile care, 26:Farming, crop cultivation,, 27:Livestock raising (cattle, poultry, sheep, etc.), 28:Shopping / getting service (incl. health services), 29:Horticulture

[147] [endtime\\_7\\_s: Until what time? <font color="maroon">\(%hrs\\_7\\_s% hours %min\\_7\\_s% minutes\)</font>](#)

Categories: 1:00:00, 2:00:15, 3:00:30, 4:00:45, 5:01:00, 6:01:15, 7:01:30, 8:01:45, 9:02:00, 10:02:15, 11:02:30, 12:02:45, 13:03:00, 14:03:15, 15:03:30, 16:03:45, 17:04:00, 18:04:15, 19:04:30, 20:04:45, 21:05:00, 22:05:15, 23:05:30, 24:05:45, 25:06:00, 26:06:15, 27:06:30, 28:06:45, 29:07:00, 30:07:15, 31:07:30, 32:07:45, 33:08:00, 34:08:15, 35:08:30, 36:08:45, 37:09:00, 38:09:15, 39:09:30, 40:09:45, 41:10:00, 42:10:15, 43:10:30, 44:10:45, 45:11:00, 46:11:15, 47:11:30, 48:11:45, 49:12:00, 50:12:15, 51:12:30, 52:12:45, 53:13:00, 54:13:15, 55:13:30, 56:13:45, 57:14:00, 58:14:15, 59:14:30, 60:14:45, 61:15:00, 62:15:15, 63:15:30, 64:15:45, 65:16:00, 66:16:15, 67:16:30, 68:16:45, 69:17:00, 70:17:15, 71:17:30, 72:17:45, 73:18:00, 74:18:15, 75:18:30, 76:18:45, 77:19:00, 78:19:15, 79:19:30, 80:19:45, 81:20:00, 82:20:15, 83:20:30, 84:20:45, 85:21:00, 86:21:15, 87:21:30, 88:21:45, 89:22:00, 90:22:15, 91:22:30, 92:22:45, 93:23:00, 94:23:15, 95:23:30, 96:23:45

[148] [activity\\_8\\_s: From <font color="maroon">%activity\\_7\\_s%</font>, what did you do?](#)

Categories: 1:Selling products and/or services in a shop, for self or household member, 2:Selling products and/or services door-to-door, for self or household member, 3:Sourcing and transporting products for trade e.g. day-old chicks, semen straws, feed, drugs etc, 4:Value -addition to the traded product e.g. processing meat, caring for the incubation process, grading etc, 5:Cleaning equipment and premises, 6:Communicating with suppliers, 7:Business group meetings (SACCO or ROSCA meetings, etc), 8:Business or self-employment activities (other than the agri-enterprise) for self or household member, 9:Work as employed, 10:Going to the bank, 11:Bookkeeping, 18:Sleeping and resting, 13:Eating and drinking, 14:Personal care, 15:School (incl. homework), 16:Cooking, 17:Domestic work (incl. fetching water, fuel), 12:Caring for children, 19:Caring for adults (sick, elderly), 20:Commuting (to/from work or school), 21:Traveling (not for work or school), 22:Exercising, 23:Social activities and hobbies, 24:Religious activities, 25:Weaving / sewing / textile care, 26:Farming, crop cultivation,, 27:Livestock raising (cattle, poultry, sheep, etc.), 28:Shopping / getting service (incl. health services), 29:Horticulture

[149] [endtime\\_8\\_s: Until what time? <font color="maroon">\(%hrs\\_8\\_s% hours %min\\_8\\_s% minutes\)</font>](#)

Categories: 1:00:00, 2:00:15, 3:00:30, 4:00:45, 5:01:00, 6:01:15, 7:01:30, 8:01:45, 9:02:00, 10:02:15, 11:02:30, 12:02:45, 13:03:00, 14:03:15, 15:03:30, 16:03:45, 17:04:00, 18:04:15, 19:04:30, 20:04:45, 21:05:00, 22:05:15, 23:05:30, 24:05:45, 25:06:00, 26:06:15, 27:06:30, 28:06:45, 29:07:00, 30:07:15, 31:07:30, 32:07:45, 33:08:00, 34:08:15, 35:08:30, 36:08:45, 37:09:00, 38:09:15, 39:09:30, 40:09:45, 41:10:00, 42:10:15, 43:10:30, 44:10:45, 45:11:00, 46:11:15, 47:11:30, 48:11:45, 49:12:00, 50:12:15, 51:12:30, 52:12:45, 53:13:00, 54:13:15, 55:13:30, 56:13:45, 57:14:00, 58:14:15, 59:14:30, 60:14:45, 61:15:00, 62:15:15, 63:15:30, 64:15:45, 65:16:00, 66:16:15, 67:16:30, 68:16:45, 69:17:00, 70:17:15, 71:17:30, 72:17:45, 73:18:00, 74:18:15, 75:18:30, 76:18:45, 77:19:00, 78:19:15, 79:19:30, 80:19:45, 81:20:00, 82:20:15, 83:20:30, 84:20:45, 85:21:00, 86:21:15, 87:21:30, 88:21:45, 89:22:00, 90:22:15, 91:22:30, 92:22:45, 93:23:00, 94:23:15, 95:23:30, 96:23:45

[150] [activity\\_9\\_s: From <font color="maroon">%activity\\_8\\_s%</font>, what did you do?](#)

Categories: 1:Selling products and/or services in a shop, for self or household member, 2:Selling products and/or services door-to-door, for self or household member, 3:Sourcing and transporting products for trade e.g. day-old chicks, semen straws, feed, drugs etc, 4:Value -addition to the traded product e.g. processing meat, caring for the incubation process, grading etc, 5:Cleaning equipment and premises, 6:Communicating with suppliers, 7:Business group meetings (SACCO or ROSCA meetings, etc), 8:Business or self-employment activities (other than the agri-enterprise) for self or household member, 9:Work as employed, 10:Going to the bank, 11:Bookkeeping, 18:Sleeping and resting, 13:Eating and drinking, 14:Personal care, 15:School (incl. homework), 16:Cooking, 17:Domestic work (incl. fetching water, fuel), 12:Caring for children, 19:Caring for adults (sick, elderly), 20:Commuting (to/from work or school), 21:Traveling (not for work or school), 22:Exercising, 23:Social activities and hobbies, 24:Religious activities, 25:Weaving / sewing / textile care, 26:Farming, crop cultivation,, 27:Livestock raising (cattle, poultry, sheep, etc.), 28:Shopping / getting service (incl. health services), 29:Horticulture

[151] [endtime\\_9\\_s: Until what time? <font color="maroon">\(%hrs\\_9\\_s% hours %min\\_9\\_s% minutes\)</font>](#)

Categories: 1:00:00, 2:00:15, 3:00:30, 4:00:45, 5:01:00, 6:01:15, 7:01:30, 8:01:45, 9:02:00, 10:02:15, 11:02:30, 12:02:45, 13:03:00, 14:03:15, 15:03:30, 16:03:45, 17:04:00, 18:04:15, 19:04:30, 20:04:45, 21:05:00, 22:05:15, 23:05:30, 24:05:45, 25:06:00, 26:06:15, 27:06:30, 28:06:45, 29:07:00, 30:07:15, 31:07:30, 32:07:45, 33:08:00, 34:08:15, 35:08:30, 36:08:45, 37:09:00, 38:09:15, 39:09:30, 40:09:45, 41:10:00, 42:10:15, 43:10:30, 44:10:45, 45:11:00, 46:11:15, 47:11:30, 48:11:45, 49:12:00, 50:12:15, 51:12:30, 52:12:45, 53:13:00, 54:13:15, 55:13:30, 56:13:45, 57:14:00, 58:14:15, 59:14:30, 60:14:45, 61:15:00, 62:15:15, 63:15:30, 64:15:45, 65:16:00, 66:16:15, 67:16:30, 68:16:45, 69:17:00, 70:17:15, 71:17:30, 72:17:45, 73:18:00, 74:18:15, 75:18:30, 76:18:45, 77:19:00, 78:19:15, 79:19:30, 80:19:45, 81:20:00, 82:20:15, 83:20:30, 84:20:45, 85:21:00, 86:21:15, 87:21:30, 88:21:45, 89:22:00, 90:22:15, 91:22:30, 92:22:45, 93:23:00, 94:23:15, 95:23:30, 96:23:45

[152] [activity\\_10\\_s: From \*\*From\*\* what time? what did you do?](#)

Categories: 1:Selling products and/or services in a shop, for self or household member, 2:Selling products and/or services door-to-door, for self or household member, 3:Sourcing and transporting products for trade e.g. day-old chicks, semen straws, feed, drugs etc, 4:Value -addition to the traded product e.g. processing meat, caring for the incubation process, grading etc, 5:Cleaning equipment and premises, 6:Communicating with suppliers, 7:Business group meetings (SACCO or ROSCA meetings, etc), 8:Business or self-employment activities (other than the agri-enterprise) for self or household member, 9:Work as employed, 10:Going to the bank, 11:Bookkeeping, 18:Sleeping and resting, 13:Eating and drinking, 14:Personal care, 15:School (incl. homework), 16:Cooking, 17:Domestic work (incl. fetching water, fuel), 12:Caring for children, 19:Caring for adults (sick, elderly), 20:Commuting (to/from work or school), 21:Traveling (not for work or school), 22:Exercising, 23:Social activities and hobbies, 24:Religious activities, 25:Weaving / sewing / textile care, 26:Farming, crop cultivation,, 27:Livestock raising (cattle, poultry, sheep, etc.), 28:Shopping / getting service (incl. health services), 29:Horticulture

[153] [endtime\\_10\\_s: Until what time? \(%hrs\\_10\\_s% hours %min\\_10\\_s% minutes\)](#)

Categories: 1:00:00, 2:00:15, 3:00:30, 4:00:45, 5:01:00, 6:01:15, 7:01:30, 8:01:45, 9:02:00, 10:02:15, 11:02:30, 12:02:45, 13:03:00, 14:03:15, 15:03:30, 16:03:45, 17:04:00, 18:04:15, 19:04:30, 20:04:45, 21:05:00, 22:05:15, 23:05:30, 24:05:45, 25:06:00, 26:06:15, 27:06:30, 28:06:45, 29:07:00, 30:07:15, 31:07:30, 32:07:45, 33:08:00, 34:08:15, 35:08:30, 36:08:45, 37:09:00, 38:09:15, 39:09:30, 40:09:45, 41:10:00, 42:10:15, 43:10:30, 44:10:45, 45:11:00, 46:11:15, 47:11:30, 48:11:45, 49:12:00, 50:12:15, 51:12:30, 52:12:45, 53:13:00, 54:13:15, 55:13:30, 56:13:45, 57:14:00, 58:14:15, 59:14:30, 60:14:45, 61:15:00, 62:15:15, 63:15:30, 64:15:45, 65:16:00, 66:16:15, 67:16:30, 68:16:45, 69:17:00, 70:17:15, 71:17:30, 72:17:45, 73:18:00, 74:18:15, 75:18:30, 76:18:45, 77:19:00, 78:19:15, 79:19:30, 80:19:45, 81:20:00, 82:20:15, 83:20:30, 84:20:45, 85:21:00, 86:21:15, 87:21:30, 88:21:45, 89:22:00, 90:22:15, 91:22:30, 92:22:45, 93:23:00, 94:23:15, 95:23:30, 96:23:45

[154] [activity\\_11\\_s: From \*\*From\*\* what time? what did you do?](#)

Categories: 1:Selling products and/or services in a shop, for self or household member, 2:Selling products and/or services door-to-door, for self or household member, 3:Sourcing and transporting products for trade e.g. day-old chicks, semen straws, feed, drugs etc, 4:Value -addition to the traded product e.g. processing meat, caring for the incubation process, grading etc, 5:Cleaning equipment and premises, 6:Communicating with suppliers, 7:Business group meetings (SACCO or ROSCA meetings, etc), 8:Business or self-employment activities (other than the agri-enterprise) for self or household member, 9:Work as employed, 10:Going to the bank, 11:Bookkeeping, 18:Sleeping and resting, 13:Eating and drinking, 14:Personal care, 15:School (incl. homework), 16:Cooking, 17:Domestic work (incl. fetching water, fuel), 12:Caring for children, 19:Caring for adults (sick, elderly), 20:Commuting (to/from work or school), 21:Traveling (not for work or school), 22:Exercising, 23:Social activities and hobbies, 24:Religious activities, 25:Weaving / sewing / textile care, 26:Farming, crop cultivation,, 27:Livestock raising (cattle, poultry, sheep, etc.), 28:Shopping / getting service (incl. health services), 29:Horticulture

[155] [endtime\\_11\\_s: Until what time? \(%hrs\\_11\\_s% hours %min\\_11\\_s% minutes\)](#)

Categories: 1:00:00, 2:00:15, 3:00:30, 4:00:45, 5:01:00, 6:01:15, 7:01:30, 8:01:45, 9:02:00, 10:02:15, 11:02:30, 12:02:45, 13:03:00, 14:03:15, 15:03:30, 16:03:45, 17:04:00, 18:04:15, 19:04:30, 20:04:45, 21:05:00, 22:05:15, 23:05:30, 24:05:45, 25:06:00, 26:06:15, 27:06:30, 28:06:45, 29:07:00, 30:07:15, 31:07:30, 32:07:45, 33:08:00, 34:08:15, 35:08:30, 36:08:45, 37:09:00, 38:09:15, 39:09:30, 40:09:45, 41:10:00, 42:10:15, 43:10:30, 44:10:45, 45:11:00, 46:11:15, 47:11:30, 48:11:45, 49:12:00, 50:12:15, 51:12:30, 52:12:45, 53:13:00, 54:13:15, 55:13:30, 56:13:45, 57:14:00, 58:14:15, 59:14:30, 60:14:45, 61:15:00, 62:15:15, 63:15:30, 64:15:45, 65:16:00, 66:16:15, 67:16:30, 68:16:45, 69:17:00, 70:17:15, 71:17:30, 72:17:45, 73:18:00, 74:18:15, 75:18:30, 76:18:45, 77:19:00, 78:19:15, 79:19:30, 80:19:45, 81:20:00, 82:20:15, 83:20:30, 84:20:45, 85:21:00, 86:21:15, 87:21:30, 88:21:45, 89:22:00, 90:22:15, 91:22:30, 92:22:45, 93:23:00, 94:23:15, 95:23:30, 96:23:45

[156] [activity\\_12\\_s: From \*\*From\*\* what time? what did you do?](#)

Categories: 1:Selling products and/or services in a shop, for self or household member, 2:Selling products and/or services door-to-door, for self or household member, 3:Sourcing and transporting products for trade e.g. day-old chicks, semen straws, feed, drugs etc, 4:Value -addition to the traded product e.g. processing meat, caring for the incubation process, grading etc, 5:Cleaning equipment and premises, 6:Communicating with suppliers, 7:Business group meetings (SACCO or ROSCA meetings, etc), 8:Business or self-employment activities (other than the agri-enterprise) for self or household member, 9:Work as employed, 10:Going to the bank, 11:Bookkeeping, 18:Sleeping and resting, 13:Eating and drinking, 14:Personal care, 15:School (incl. homework), 16:Cooking, 17:Domestic work (incl. fetching water, fuel), 12:Caring for children, 19:Caring for adults (sick, elderly), 20:Commuting (to/from work or school), 21:Traveling (not for work or school), 22:Exercising, 23:Social activities and hobbies, 24:Religious activities, 25:Weaving / sewing / textile care, 26:Farming, crop cultivation,, 27:Livestock raising (cattle, poultry, sheep, etc.), 28:Shopping / getting service (incl. health services), 29:Horticulture

[157] [endtime\\_12\\_s: Until what time? \(%hrs\\_12\\_s% hours %min\\_12\\_s% minutes\)](#)

Categories: 1:00:00, 2:00:15, 3:00:30, 4:00:45, 5:01:00, 6:01:15, 7:01:30, 8:01:45, 9:02:00, 10:02:15, 11:02:30, 12:02:45, 13:03:00, 14:03:15, 15:03:30, 16:03:45, 17:04:00, 18:04:15, 19:04:30, 20:04:45, 21:05:00, 22:05:15, 23:05:30, 24:05:45, 25:06:00, 26:06:15, 27:06:30, 28:06:45, 29:07:00, 30:07:15, 31:07:30, 32:07:45, 33:08:00, 34:08:15, 35:08:30, 36:08:45, 37:09:00, 38:09:15, 39:09:30, 40:09:45, 41:10:00, 42:10:15, 43:10:30, 44:10:45, 45:11:00, 46:11:15, 47:11:30, 48:11:45, 49:12:00, 50:12:15, 51:12:30, 52:12:45, 53:13:00, 54:13:15, 55:13:30, 56:13:45, 57:14:00, 58:14:15, 59:14:30, 60:14:45, 61:15:00, 62:15:15, 63:15:30, 64:15:45, 65:16:00, 66:16:15, 67:16:30, 68:16:45, 69:17:00, 70:17:15, 71:17:30, 72:17:45, 73:18:00, 74:18:15, 75:18:30, 76:18:45, 77:19:00, 78:19:15, 79:19:30, 80:19:45, 81:20:00, 82:20:15, 83:20:30, 84:20:45, 85:21:00, 86:21:15, 87:21:30, 88:21:45, 89:22:00, 90:22:15, 91:22:30, 92:22:45, 93:23:00, 94:23:15, 95:23:30, 96:23:45

[158] [activity\\_13\\_s: From \*\*activity\\_12\\_s\*\*, what did you do?](#)

Categories: 1:Selling products and/or services in a shop, for self or household member, 2:Selling products and/or services door-to-door, for self or household member, 3:Sourcing and transporting products for trade e.g. day-old chicks, semen straws, feed, drugs etc, 4:Value -addition to the traded product e.g. processing meat, caring for the incubation process, grading etc, 5:Cleaning equipment and premises, 6:Communicating with suppliers, 7:Business group meetings (SACCO or ROSCA meetings, etc), 8:Business or self-employment activities (other than the agri-enterprise) for self or household member, 9:Work as employed, 10:Going to the bank, 11:Bookkeeping, 18:Sleeping and resting, 13:Eating and drinking, 14:Personal care, 15:School (incl. homework), 16:Cooking, 17:Domestic work (incl. fetching water, fuel), 12:Caring for children, 19:Caring for adults (sick, elderly), 20:Commuting (to/from work or school), 21:Traveling (not for work or school), 22:Exercising, 23:Social activities and hobbies, 24:Religious activities, 25:Weaving / sewing / textile care, 26:Farming, crop cultivation,, 27:Livestock raising (cattle, poultry, sheep, etc.), 28:Shopping / getting service (incl. health services), 29:Horticulture

[159] [endtime\\_13\\_s: Until what time? \*\*\(%hrs\\_13\\_s hours %min\\_13\\_s minutes\)\*\*](#)

Categories: 1:00:00, 2:00:15, 3:00:30, 4:00:45, 5:01:00, 6:01:15, 7:01:30, 8:01:45, 9:02:00, 10:02:15, 11:02:30, 12:02:45, 13:03:00, 14:03:15, 15:03:30, 16:03:45, 17:04:00, 18:04:15, 19:04:30, 20:04:45, 21:05:00, 22:05:15, 23:05:30, 24:05:45, 25:06:00, 26:06:15, 27:06:30, 28:06:45, 29:07:00, 30:07:15, 31:07:30, 32:07:45, 33:08:00, 34:08:15, 35:08:30, 36:08:45, 37:09:00, 38:09:15, 39:09:30, 40:09:45, 41:10:00, 42:10:15, 43:10:30, 44:10:45, 45:11:00, 46:11:15, 47:11:30, 48:11:45, 49:12:00, 50:12:15, 51:12:30, 52:12:45, 53:13:00, 54:13:15, 55:13:30, 56:13:45, 57:14:00, 58:14:15, 59:14:30, 60:14:45, 61:15:00, 62:15:15, 63:15:30, 64:15:45, 65:16:00, 66:16:15, 67:16:30, 68:16:45, 69:17:00, 70:17:15, 71:17:30, 72:17:45, 73:18:00, 74:18:15, 75:18:30, 76:18:45, 77:19:00, 78:19:15, 79:19:30, 80:19:45, 81:20:00, 82:20:15, 83:20:30, 84:20:45, 85:21:00, 86:21:15, 87:21:30, 88:21:45, 89:22:00, 90:22:15, 91:22:30, 92:22:45, 93:23:00, 94:23:15, 95:23:30, 96:23:45

[160] [activity\\_14\\_s: From \*\*activity\\_13\\_s\*\*, what did you do?](#)

Categories: 1:Selling products and/or services in a shop, for self or household member, 2:Selling products and/or services door-to-door, for self or household member, 3:Sourcing and transporting products for trade e.g. day-old chicks, semen straws, feed, drugs etc, 4:Value -addition to the traded product e.g. processing meat, caring for the incubation process, grading etc, 5:Cleaning equipment and premises, 6:Communicating with suppliers, 7:Business group meetings (SACCO or ROSCA meetings, etc), 8:Business or self-employment activities (other than the agri-enterprise) for self or household member, 9:Work as employed, 10:Going to the bank, 11:Bookkeeping, 18:Sleeping and resting, 13:Eating and drinking, 14:Personal care, 15:School (incl. homework), 16:Cooking, 17:Domestic work (incl. fetching water, fuel), 12:Caring for children, 19:Caring for adults (sick, elderly), 20:Commuting (to/from work or school), 21:Traveling (not for work or school), 22:Exercising, 23:Social activities and hobbies, 24:Religious activities, 25:Weaving / sewing / textile care, 26:Farming, crop cultivation,, 27:Livestock raising (cattle, poultry, sheep, etc.), 28:Shopping / getting service (incl. health services), 29:Horticulture

[161] [endtime\\_14\\_s: Until what time? \*\*\(%hrs\\_14\\_s hours %min\\_14\\_s minutes\)\*\*](#)

Categories: 1:00:00, 2:00:15, 3:00:30, 4:00:45, 5:01:00, 6:01:15, 7:01:30, 8:01:45, 9:02:00, 10:02:15, 11:02:30, 12:02:45, 13:03:00, 14:03:15, 15:03:30, 16:03:45, 17:04:00, 18:04:15, 19:04:30, 20:04:45, 21:05:00, 22:05:15, 23:05:30, 24:05:45, 25:06:00, 26:06:15, 27:06:30, 28:06:45, 29:07:00, 30:07:15, 31:07:30, 32:07:45, 33:08:00, 34:08:15, 35:08:30, 36:08:45, 37:09:00, 38:09:15, 39:09:30, 40:09:45, 41:10:00, 42:10:15, 43:10:30, 44:10:45, 45:11:00, 46:11:15, 47:11:30, 48:11:45, 49:12:00, 50:12:15, 51:12:30, 52:12:45, 53:13:00, 54:13:15, 55:13:30, 56:13:45, 57:14:00, 58:14:15, 59:14:30, 60:14:45, 61:15:00, 62:15:15, 63:15:30, 64:15:45, 65:16:00, 66:16:15, 67:16:30, 68:16:45, 69:17:00, 70:17:15, 71:17:30, 72:17:45, 73:18:00, 74:18:15, 75:18:30, 76:18:45, 77:19:00, 78:19:15, 79:19:30, 80:19:45, 81:20:00, 82:20:15, 83:20:30, 84:20:45, 85:21:00, 86:21:15, 87:21:30, 88:21:45, 89:22:00, 90:22:15, 91:22:30, 92:22:45, 93:23:00, 94:23:15, 95:23:30, 96:23:45

[162] [activity\\_15\\_s: From \*\*activity\\_14\\_s\*\*, what did you do?](#)

Categories: 1:Selling products and/or services in a shop, for self or household member, 2:Selling products and/or services door-to-door, for self or household member, 3:Sourcing and transporting products for trade e.g. day-old chicks, semen straws, feed, drugs etc, 4:Value -addition to the traded product e.g. processing meat, caring for the incubation process, grading etc, 5:Cleaning equipment and premises, 6:Communicating with suppliers, 7:Business group meetings (SACCO or ROSCA meetings, etc), 8:Business or self-employment activities (other than the agri-enterprise) for self or household member, 9:Work as employed, 10:Going to the bank, 11:Bookkeeping, 18:Sleeping and resting, 13:Eating and drinking, 14:Personal care, 15:School (incl. homework), 16:Cooking, 17:Domestic work (incl. fetching water, fuel), 12:Caring for children, 19:Caring for adults (sick, elderly), 20:Commuting (to/from work or school), 21:Traveling (not for work or school), 22:Exercising, 23:Social activities and hobbies, 24:Religious activities, 25:Weaving / sewing / textile care, 26:Farming, crop cultivation,, 27:Livestock raising (cattle, poultry, sheep, etc.), 28:Shopping / getting service (incl. health services), 29:Horticulture

[163] [endtime\\_15\\_s: Until what time? \*\*\(%hrs\\_15\\_s hours %min\\_15\\_s minutes\)\*\*](#)

Categories: 1:00:00, 2:00:15, 3:00:30, 4:00:45, 5:01:00, 6:01:15, 7:01:30, 8:01:45, 9:02:00, 10:02:15, 11:02:30, 12:02:45, 13:03:00, 14:03:15, 15:03:30, 16:03:45, 17:04:00, 18:04:15, 19:04:30, 20:04:45, 21:05:00, 22:05:15, 23:05:30, 24:05:45, 25:06:00, 26:06:15, 27:06:30, 28:06:45, 29:07:00, 30:07:15, 31:07:30, 32:07:45, 33:08:00, 34:08:15, 35:08:30, 36:08:45, 37:09:00, 38:09:15, 39:09:30, 40:09:45, 41:10:00, 42:10:15, 43:10:30, 44:10:45, 45:11:00, 46:11:15, 47:11:30, 48:11:45, 49:12:00, 50:12:15, 51:12:30, 52:12:45, 53:13:00, 54:13:15, 55:13:30, 56:13:45, 57:14:00, 58:14:15, 59:14:30, 60:14:45, 61:15:00, 62:15:15, 63:15:30, 64:15:45, 65:16:00, 66:16:15, 67:16:30, 68:16:45, 69:17:00, 70:17:15, 71:17:30, 72:17:45, 73:18:00, 74:18:15, 75:18:30, 76:18:45, 77:19:00, 78:19:15, 79:19:30, 80:19:45, 81:20:00, 82:20:15, 83:20:30, 84:20:45, 85:21:00, 86:21:15, 87:21:30, 88:21:45, 89:22:00, 90:22:15, 91:22:30, 92:22:45, 93:23:00, 94:23:15, 95:23:30, 96:23:45

[164] [activity\\_16\\_s: From \*\*activity\\_15\\_s\*\*, what did you do?](#)

Categories: 1:Selling products and/or services in a shop, for self or household member, 2:Selling products and/or services door-to-door, for self or household member, 3:Sourcing and transporting products for trade e.g. day-old chicks, semen straws, feed, drugs etc, 4:Value -addition to the traded product e.g. processing meat, caring for the incubation process, grading etc, 5:Cleaning equipment and premises, 6:Communicating with suppliers, 7:Business group meetings (SACCO or ROSCA meetings, etc), 8:Business or self-employment activities (other than the agri-enterprise) for self or household member, 9:Work as employed, 10:Going to the bank, 11:Bookkeeping, 18:Sleeping and resting, 13:Eating and drinking, 14:Personal care, 15:School (incl. homework), 16:Cooking, 17:Domestic work (incl. fetching water, fuel), 12:Caring for children, 19:Caring for adults (sick, elderly), 20:Commuting (to/from work or school), 21:Traveling (not for work or school), 22:Exercising, 23:Social activities and hobbies, 24:Religious activities, 25:Weaving / sewing / textile care, 26:Farming, crop cultivation,, 27:Livestock raising (cattle, poultry, sheep, etc.), 28:Shopping / getting service (incl. health services), 29:Horticulture

[165] [endtime\\_16\\_s: Until what time? \*\*\(%hrs\\_16\\_s% hours %min\\_16\\_s% minutes\)\*\*](#)

Categories: 1:00:00, 2:00:15, 3:00:30, 4:00:45, 5:01:00, 6:01:15, 7:01:30, 8:01:45, 9:02:00, 10:02:15, 11:02:30, 12:02:45, 13:03:00, 14:03:15, 15:03:30, 16:03:45, 17:04:00, 18:04:15, 19:04:30, 20:04:45, 21:05:00, 22:05:15, 23:05:30, 24:05:45, 25:06:00, 26:06:15, 27:06:30, 28:06:45, 29:07:00, 30:07:15, 31:07:30, 32:07:45, 33:08:00, 34:08:15, 35:08:30, 36:08:45, 37:09:00, 38:09:15, 39:09:30, 40:09:45, 41:10:00, 42:10:15, 43:10:30, 44:10:45, 45:11:00, 46:11:15, 47:11:30, 48:11:45, 49:12:00, 50:12:15, 51:12:30, 52:12:45, 53:13:00, 54:13:15, 55:13:30, 56:13:45, 57:14:00, 58:14:15, 59:14:30, 60:14:45, 61:15:00, 62:15:15, 63:15:30, 64:15:45, 65:16:00, 66:16:15, 67:16:30, 68:16:45, 69:17:00, 70:17:15, 71:17:30, 72:17:45, 73:18:00, 74:18:15, 75:18:30, 76:18:45, 77:19:00, 78:19:15, 79:19:30, 80:19:45, 81:20:00, 82:20:15, 83:20:30, 84:20:45, 85:21:00, 86:21:15, 87:21:30, 88:21:45, 89:22:00, 90:22:15, 91:22:30, 92:22:45, 93:23:00, 94:23:15, 95:23:30, 96:23:45

[166] [activity\\_17\\_s: From \*\*activity\\_16\\_s\*\*, what did you do?](#)

Categories: 1:Selling products and/or services in a shop, for self or household member, 2:Selling products and/or services door-to-door, for self or household member, 3:Sourcing and transporting products for trade e.g. day-old chicks, semen straws, feed, drugs etc, 4:Value -addition to the traded product e.g. processing meat, caring for the incubation process, grading etc, 5:Cleaning equipment and premises, 6:Communicating with suppliers, 7:Business group meetings (SACCO or ROSCA meetings, etc), 8:Business or self-employment activities (other than the agri-enterprise) for self or household member, 9:Work as employed, 10:Going to the bank, 11:Bookkeeping, 18:Sleeping and resting, 13:Eating and drinking, 14:Personal care, 15:School (incl. homework), 16:Cooking, 17:Domestic work (incl. fetching water, fuel), 12:Caring for children, 19:Caring for adults (sick, elderly), 20:Commuting (to/from work or school), 21:Traveling (not for work or school), 22:Exercising, 23:Social activities and hobbies, 24:Religious activities, 25:Weaving / sewing / textile care, 26:Farming, crop cultivation,, 27:Livestock raising (cattle, poultry, sheep, etc.), 28:Shopping / getting service (incl. health services), 29:Horticulture

[167] [endtime\\_17\\_s: Until what time? \*\*\(%hrs\\_17\\_s% hours %min\\_17\\_s% minutes\)\*\*](#)

Categories: 1:00:00, 2:00:15, 3:00:30, 4:00:45, 5:01:00, 6:01:15, 7:01:30, 8:01:45, 9:02:00, 10:02:15, 11:02:30, 12:02:45, 13:03:00, 14:03:15, 15:03:30, 16:03:45, 17:04:00, 18:04:15, 19:04:30, 20:04:45, 21:05:00, 22:05:15, 23:05:30, 24:05:45, 25:06:00, 26:06:15, 27:06:30, 28:06:45, 29:07:00, 30:07:15, 31:07:30, 32:07:45, 33:08:00, 34:08:15, 35:08:30, 36:08:45, 37:09:00, 38:09:15, 39:09:30, 40:09:45, 41:10:00, 42:10:15, 43:10:30, 44:10:45, 45:11:00, 46:11:15, 47:11:30, 48:11:45, 49:12:00, 50:12:15, 51:12:30, 52:12:45, 53:13:00, 54:13:15, 55:13:30, 56:13:45, 57:14:00, 58:14:15, 59:14:30, 60:14:45, 61:15:00, 62:15:15, 63:15:30, 64:15:45, 65:16:00, 66:16:15, 67:16:30, 68:16:45, 69:17:00, 70:17:15, 71:17:30, 72:17:45, 73:18:00, 74:18:15, 75:18:30, 76:18:45, 77:19:00, 78:19:15, 79:19:30, 80:19:45, 81:20:00, 82:20:15, 83:20:30, 84:20:45, 85:21:00, 86:21:15, 87:21:30, 88:21:45, 89:22:00, 90:22:15, 91:22:30, 92:22:45, 93:23:00, 94:23:15, 95:23:30, 96:23:45

[168] [activity\\_18\\_s: From \*\*activity\\_17\\_s\*\*, what did you do?](#)

Categories: 1:Selling products and/or services in a shop, for self or household member, 2:Selling products and/or services door-to-door, for self or household member, 3:Sourcing and transporting products for trade e.g. day-old chicks, semen straws, feed, drugs etc, 4:Value -addition to the traded product e.g. processing meat, caring for the incubation process, grading etc, 5:Cleaning equipment and premises, 6:Communicating with suppliers, 7:Business group meetings (SACCO or ROSCA meetings, etc), 8:Business or self-employment activities (other than the agri-enterprise) for self or household member, 9:Work as employed, 10:Going to the bank, 11:Bookkeeping, 18:Sleeping and resting, 13:Eating and drinking, 14:Personal care, 15:School (incl. homework), 16:Cooking, 17:Domestic work (incl. fetching water, fuel), 12:Caring for children, 19:Caring for adults (sick, elderly), 20:Commuting (to/from work or school), 21:Traveling (not for work or school), 22:Exercising, 23:Social activities and hobbies, 24:Religious activities, 25:Weaving / sewing / textile care, 26:Farming, crop cultivation,, 27:Livestock raising (cattle, poultry, sheep, etc.), 28:Shopping / getting service (incl. health services), 29:Horticulture

[169] [endtime\\_18\\_s: Until what time? \*\*\(%hrs\\_18\\_s% hours %min\\_18\\_s% minutes\)\*\*](#)

Categories: 1:00:00, 2:00:15, 3:00:30, 4:00:45, 5:01:00, 6:01:15, 7:01:30, 8:01:45, 9:02:00, 10:02:15, 11:02:30, 12:02:45, 13:03:00, 14:03:15, 15:03:30, 16:03:45, 17:04:00, 18:04:15, 19:04:30, 20:04:45, 21:05:00, 22:05:15, 23:05:30, 24:05:45, 25:06:00, 26:06:15, 27:06:30, 28:06:45, 29:07:00, 30:07:15, 31:07:30, 32:07:45, 33:08:00, 34:08:15, 35:08:30, 36:08:45, 37:09:00, 38:09:15, 39:09:30, 40:09:45, 41:10:00, 42:10:15, 43:10:30, 44:10:45, 45:11:00, 46:11:15, 47:11:30, 48:11:45, 49:12:00, 50:12:15, 51:12:30, 52:12:45, 53:13:00, 54:13:15, 55:13:30, 56:13:45, 57:14:00, 58:14:15, 59:14:30, 60:14:45, 61:15:00, 62:15:15, 63:15:30, 64:15:45, 65:16:00, 66:16:15, 67:16:30, 68:16:45, 69:17:00, 70:17:15, 71:17:30, 72:17:45, 73:18:00, 74:18:15, 75:18:30, 76:18:45, 77:19:00, 78:19:15, 79:19:30, 80:19:45, 81:20:00, 82:20:15, 83:20:30, 84:20:45, 85:21:00, 86:21:15, 87:21:30, 88:21:45, 89:22:00, 90:22:15, 91:22:30, 92:22:45, 93:23:00, 94:23:15, 95:23:30, 96:23:45

[170] [activity\\_19\\_s: From \*\*activity\\_18\\_s\*\*, what did you do?](#)

Categories: 1:Selling products and/or services in a shop, for self or household member, 2:Selling products and/or services door-to-door, for self or household member, 3:Sourcing and transporting products for trade e.g. day-old chicks, semen straws, feed, drugs etc, 4:Value -addition to the traded product e.g. processing meat, caring for the incubation process, grading etc, 5:Cleaning equipment and premises, 6:Communicating with suppliers, 7:Business group meetings (SACCO or ROSCA meetings, etc), 8:Business or self-employment activities (other than the agri-enterprise) for self or household member, 9:Work as employed, 10:Going to the bank, 11:Bookkeeping, 18:Sleeping and resting, 13:Eating and drinking, 14:Personal care, 15:School (incl. homework), 16:Cooking, 17:Domestic work (incl. fetching water, fuel), 12:Caring for children, 19:Caring for adults (sick, elderly), 20:Commuting (to/from work or school), 21:Traveling (not for work or school), 22:Exercising, 23:Social activities and hobbies, 24:Religious activities, 25:Weaving / sewing / textile care, 26:Farming, crop cultivation,, 27:Livestock raising (cattle, poultry, sheep, etc.), 28:Shopping / getting service (incl. health services), 29:Horticulture

[171] [endtime\\_19\\_s: Until what time? \*\*\(hrs\\_19\\_s hours min\\_19\\_s minutes\)\*\*](#)

Categories: 1:00:00, 2:00:15, 3:00:30, 4:00:45, 5:01:00, 6:01:15, 7:01:30, 8:01:45, 9:02:00, 10:02:15, 11:02:30, 12:02:45, 13:03:00, 14:03:15, 15:03:30, 16:03:45, 17:04:00, 18:04:15, 19:04:30, 20:04:45, 21:05:00, 22:05:15, 23:05:30, 24:05:45, 25:06:00, 26:06:15, 27:06:30, 28:06:45, 29:07:00, 30:07:15, 31:07:30, 32:07:45, 33:08:00, 34:08:15, 35:08:30, 36:08:45, 37:09:00, 38:09:15, 39:09:30, 40:09:45, 41:10:00, 42:10:15, 43:10:30, 44:10:45, 45:11:00, 46:11:15, 47:11:30, 48:11:45, 49:12:00, 50:12:15, 51:12:30, 52:12:45, 53:13:00, 54:13:15, 55:13:30, 56:13:45, 57:14:00, 58:14:15, 59:14:30, 60:14:45, 61:15:00, 62:15:15, 63:15:30, 64:15:45, 65:16:00, 66:16:15, 67:16:30, 68:16:45, 69:17:00, 70:17:15, 71:17:30, 72:17:45, 73:18:00, 74:18:15, 75:18:30, 76:18:45, 77:19:00, 78:19:15, 79:19:30, 80:19:45, 81:20:00, 82:20:15, 83:20:30, 84:20:45, 85:21:00, 86:21:15, 87:21:30, 88:21:45, 89:22:00, 90:22:15, 91:22:30, 92:22:45, 93:23:00, 94:23:15, 95:23:30, 96:23:45

[172] [activity\\_20\\_s: From \*\*activity\\_19\\_s\*\*, what did you do?](#)

Categories: 1:Selling products and/or services in a shop, for self or household member, 2:Selling products and/or services door-to-door, for self or household member, 3:Sourcing and transporting products for trade e.g. day-old chicks, semen straws, feed, drugs etc, 4:Value -addition to the traded product e.g. processing meat, caring for the incubation process, grading etc, 5:Cleaning equipment and premises, 6:Communicating with suppliers, 7:Business group meetings (SACCO or ROSCA meetings, etc), 8:Business or self-employment activities (other than the agri-enterprise) for self or household member, 9:Work as employed, 10:Going to the bank, 11:Bookkeeping, 18:Sleeping and resting, 13:Eating and drinking, 14:Personal care, 15:School (incl. homework), 16:Cooking, 17:Domestic work (incl. fetching water, fuel), 12:Caring for children, 19:Caring for adults (sick, elderly), 20:Commuting (to/from work or school), 21:Traveling (not for work or school), 22:Exercising, 23:Social activities and hobbies, 24:Religious activities, 25:Weaving / sewing / textile care, 26:Farming, crop cultivation,, 27:Livestock raising (cattle, poultry, sheep, etc.), 28:Shopping / getting service (incl. health services), 29:Horticulture

[173] [endtime\\_20\\_s: Until what time? \*\*\(hrs\\_20\\_s hours min\\_20\\_s minutes\)\*\*](#)

Categories: 1:00:00, 2:00:15, 3:00:30, 4:00:45, 5:01:00, 6:01:15, 7:01:30, 8:01:45, 9:02:00, 10:02:15, 11:02:30, 12:02:45, 13:03:00, 14:03:15, 15:03:30, 16:03:45, 17:04:00, 18:04:15, 19:04:30, 20:04:45, 21:05:00, 22:05:15, 23:05:30, 24:05:45, 25:06:00, 26:06:15, 27:06:30, 28:06:45, 29:07:00, 30:07:15, 31:07:30, 32:07:45, 33:08:00, 34:08:15, 35:08:30, 36:08:45, 37:09:00, 38:09:15, 39:09:30, 40:09:45, 41:10:00, 42:10:15, 43:10:30, 44:10:45, 45:11:00, 46:11:15, 47:11:30, 48:11:45, 49:12:00, 50:12:15, 51:12:30, 52:12:45, 53:13:00, 54:13:15, 55:13:30, 56:13:45, 57:14:00, 58:14:15, 59:14:30, 60:14:45, 61:15:00, 62:15:15, 63:15:30, 64:15:45, 65:16:00, 66:16:15, 67:16:30, 68:16:45, 69:17:00, 70:17:15, 71:17:30, 72:17:45, 73:18:00, 74:18:15, 75:18:30, 76:18:45, 77:19:00, 78:19:15, 79:19:30, 80:19:45, 81:20:00, 82:20:15, 83:20:30, 84:20:45, 85:21:00, 86:21:15, 87:21:30, 88:21:45, 89:22:00, 90:22:15, 91:22:30, 92:22:45, 93:23:00, 94:23:15, 95:23:30, 96:23:45

[174] [activity\\_21\\_s: From \*\*activity\\_20\\_s\*\*, what did you do?](#)

Categories: 1:Selling products and/or services in a shop, for self or household member, 2:Selling products and/or services door-to-door, for self or household member, 3:Sourcing and transporting products for trade e.g. day-old chicks, semen straws, feed, drugs etc, 4:Value -addition to the traded product e.g. processing meat, caring for the incubation process, grading etc, 5:Cleaning equipment and premises, 6:Communicating with suppliers, 7:Business group meetings (SACCO or ROSCA meetings, etc), 8:Business or self-employment activities (other than the agri-enterprise) for self or household member, 9:Work as employed, 10:Going to the bank, 11:Bookkeeping, 18:Sleeping and resting, 13:Eating and drinking, 14:Personal care, 15:School (incl. homework), 16:Cooking, 17:Domestic work (incl. fetching water, fuel), 12:Caring for children, 19:Caring for adults (sick, elderly), 20:Commuting (to/from work or school), 21:Traveling (not for work or school), 22:Exercising, 23:Social activities and hobbies, 24:Religious activities, 25:Weaving / sewing / textile care, 26:Farming, crop cultivation,, 27:Livestock raising (cattle, poultry, sheep, etc.), 28:Shopping / getting service (incl. health services), 29:Horticulture

[175] [endtime\\_21\\_s: Until what time? \*\*\(hrs\\_21\\_s hours min\\_21\\_s minutes\)\*\*](#)

Categories: 1:00:00, 2:00:15, 3:00:30, 4:00:45, 5:01:00, 6:01:15, 7:01:30, 8:01:45, 9:02:00, 10:02:15, 11:02:30, 12:02:45, 13:03:00, 14:03:15, 15:03:30, 16:03:45, 17:04:00, 18:04:15, 19:04:30, 20:04:45, 21:05:00, 22:05:15, 23:05:30, 24:05:45, 25:06:00, 26:06:15, 27:06:30, 28:06:45, 29:07:00, 30:07:15, 31:07:30, 32:07:45, 33:08:00, 34:08:15, 35:08:30, 36:08:45, 37:09:00, 38:09:15, 39:09:30, 40:09:45, 41:10:00, 42:10:15, 43:10:30, 44:10:45, 45:11:00, 46:11:15, 47:11:30, 48:11:45, 49:12:00, 50:12:15, 51:12:30, 52:12:45, 53:13:00, 54:13:15, 55:13:30, 56:13:45, 57:14:00, 58:14:15, 59:14:30, 60:14:45, 61:15:00, 62:15:15, 63:15:30, 64:15:45, 65:16:00, 66:16:15, 67:16:30, 68:16:45, 69:17:00, 70:17:15, 71:17:30, 72:17:45, 73:18:00, 74:18:15, 75:18:30, 76:18:45, 77:19:00, 78:19:15, 79:19:30, 80:19:45, 81:20:00, 82:20:15, 83:20:30, 84:20:45, 85:21:00, 86:21:15, 87:21:30, 88:21:45, 89:22:00, 90:22:15, 91:22:30, 92:22:45, 93:23:00, 94:23:15, 95:23:30, 96:23:45

[176] [activity\\_22\\_s: From \*\*activity\\_21\\_s\*\*, what did you do?](#)

Categories: 1:Selling products and/or services in a shop, for self or household member, 2:Selling products and/or services door-to-door, for self or household member, 3:Sourcing and transporting products for trade e.g. day-old chicks, semen straws, feed, drugs etc, 4:Value -addition to the traded product e.g. processing meat, caring for the incubation process, grading etc, 5:Cleaning equipment and premises, 6:Communicating with suppliers, 7:Business group meetings (SACCO or ROSCA meetings, etc), 8:Business or self-employment activities (other than the agri-enterprise) for self or household member, 9:Work as employed, 10:Going to the bank, 11:Bookkeeping, 18:Sleeping and resting, 13:Eating and drinking, 14:Personal care, 15:School (incl. homework), 16:Cooking, 17:Domestic work (incl. fetching water, fuel), 12:Caring for children, 19:Caring for adults (sick, elderly), 20:Commuting (to/from work or school), 21:Traveling (not for work or school), 22:Exercising, 23:Social activities and hobbies, 24:Religious activities, 25:Weaving / sewing / textile care, 26:Farming, crop cultivation,, 27:Livestock raising (cattle, poultry, sheep, etc.), 28:Shopping / getting service (incl. health services), 29:Horticulture

[177] [endtime\\_22\\_s: Until what time? \*\*\(hrs\\_22\\_s hours min\\_22\\_s minutes\)\*\*](#)

Categories: 1:00:00, 2:00:15, 3:00:30, 4:00:45, 5:01:00, 6:01:15, 7:01:30, 8:01:45, 9:02:00, 10:02:15, 11:02:30, 12:02:45, 13:03:00, 14:03:15, 15:03:30, 16:03:45, 17:04:00, 18:04:15, 19:04:30, 20:04:45, 21:05:00, 22:05:15, 23:05:30, 24:05:45, 25:06:00, 26:06:15, 27:06:30, 28:06:45, 29:07:00, 30:07:15, 31:07:30, 32:07:45, 33:08:00, 34:08:15, 35:08:30, 36:08:45, 37:09:00, 38:09:15, 39:09:30, 40:09:45, 41:10:00, 42:10:15, 43:10:30, 44:10:45, 45:11:00, 46:11:15, 47:11:30, 48:11:45, 49:12:00, 50:12:15, 51:12:30, 52:12:45, 53:13:00, 54:13:15, 55:13:30, 56:13:45, 57:14:00, 58:14:15, 59:14:30, 60:14:45, 61:15:00, 62:15:15, 63:15:30, 64:15:45, 65:16:00, 66:16:15, 67:16:30, 68:16:45, 69:17:00, 70:17:15, 71:17:30, 72:17:45, 73:18:00, 74:18:15, 75:18:30, 76:18:45, 77:19:00, 78:19:15, 79:19:30, 80:19:45, 81:20:00, 82:20:15, 83:20:30, 84:20:45, 85:21:00, 86:21:15, 87:21:30, 88:21:45, 89:22:00, 90:22:15, 91:22:30, 92:22:45, 93:23:00, 94:23:15, 95:23:30, 96:23:45

[178] [activity\\_23\\_s: From \*\*activity\\_22\\_s\*\*, what did you do?](#)

Categories: 1:Selling products and/or services in a shop, for self or household member, 2:Selling products and/or services door-to-door, for self or household member, 3:Sourcing and transporting products for trade e.g. day-old chicks, semen straws, feed, drugs etc, 4:Value -addition to the traded product e.g. processing meat, caring for the incubation process, grading etc, 5:Cleaning equipment and premises, 6:Communicating with suppliers, 7:Business group meetings (SACCO or ROSCA meetings, etc), 8:Business or self-employment activities (other than the agri-enterprise) for self or household member, 9:Work as employed, 10:Going to the bank, 11:Bookkeeping, 18:Sleeping and resting, 13:Eating and drinking, 14:Personal care, 15:School (incl. homework), 16:Cooking, 17:Domestic work (incl. fetching water, fuel), 12:Caring for children, 19:Caring for adults (sick, elderly), 20:Commuting (to/from work or school), 21:Traveling (not for work or school), 22:Exercising, 23:Social activities and hobbies, 24:Religious activities, 25:Weaving / sewing / textile care, 26:Farming, crop cultivation,, 27:Livestock raising (cattle, poultry, sheep, etc.), 28:Shopping / getting service (incl. health services), 29:Horticulture

[179] [endtime\\_23\\_s: Until what time? \*\*\(hrs\\_23\\_s hours min\\_23\\_s minutes\)\*\*](#)

Categories: 1:00:00, 2:00:15, 3:00:30, 4:00:45, 5:01:00, 6:01:15, 7:01:30, 8:01:45, 9:02:00, 10:02:15, 11:02:30, 12:02:45, 13:03:00, 14:03:15, 15:03:30, 16:03:45, 17:04:00, 18:04:15, 19:04:30, 20:04:45, 21:05:00, 22:05:15, 23:05:30, 24:05:45, 25:06:00, 26:06:15, 27:06:30, 28:06:45, 29:07:00, 30:07:15, 31:07:30, 32:07:45, 33:08:00, 34:08:15, 35:08:30, 36:08:45, 37:09:00, 38:09:15, 39:09:30, 40:09:45, 41:10:00, 42:10:15, 43:10:30, 44:10:45, 45:11:00, 46:11:15, 47:11:30, 48:11:45, 49:12:00, 50:12:15, 51:12:30, 52:12:45, 53:13:00, 54:13:15, 55:13:30, 56:13:45, 57:14:00, 58:14:15, 59:14:30, 60:14:45, 61:15:00, 62:15:15, 63:15:30, 64:15:45, 65:16:00, 66:16:15, 67:16:30, 68:16:45, 69:17:00, 70:17:15, 71:17:30, 72:17:45, 73:18:00, 74:18:15, 75:18:30, 76:18:45, 77:19:00, 78:19:15, 79:19:30, 80:19:45, 81:20:00, 82:20:15, 83:20:30, 84:20:45, 85:21:00, 86:21:15, 87:21:30, 88:21:45, 89:22:00, 90:22:15, 91:22:30, 92:22:45, 93:23:00, 94:23:15, 95:23:30, 96:23:45

[180] [activity\\_24\\_s: From \*\*activity\\_23\\_s\*\*, what did you do?](#)

Categories: 1:Selling products and/or services in a shop, for self or household member, 2:Selling products and/or services door-to-door, for self or household member, 3:Sourcing and transporting products for trade e.g. day-old chicks, semen straws, feed, drugs etc, 4:Value -addition to the traded product e.g. processing meat, caring for the incubation process, grading etc, 5:Cleaning equipment and premises, 6:Communicating with suppliers, 7:Business group meetings (SACCO or ROSCA meetings, etc), 8:Business or self-employment activities (other than the agri-enterprise) for self or household member, 9:Work as employed, 10:Going to the bank, 11:Bookkeeping, 18:Sleeping and resting, 13:Eating and drinking, 14:Personal care, 15:School (incl. homework), 16:Cooking, 17:Domestic work (incl. fetching water, fuel), 12:Caring for children, 19:Caring for adults (sick, elderly), 20:Commuting (to/from work or school), 21:Traveling (not for work or school), 22:Exercising, 23:Social activities and hobbies, 24:Religious activities, 25:Weaving / sewing / textile care, 26:Farming, crop cultivation,, 27:Livestock raising (cattle, poultry, sheep, etc.), 28:Shopping / getting service (incl. health services), 29:Horticulture

[181] [endtime\\_24\\_s: Until what time? \*\*\(hrs\\_24\\_s hours min\\_24\\_s minutes\)\*\*](#)

Categories: 1:00:00, 2:00:15, 3:00:30, 4:00:45, 5:01:00, 6:01:15, 7:01:30, 8:01:45, 9:02:00, 10:02:15, 11:02:30, 12:02:45, 13:03:00, 14:03:15, 15:03:30, 16:03:45, 17:04:00, 18:04:15, 19:04:30, 20:04:45, 21:05:00, 22:05:15, 23:05:30, 24:05:45, 25:06:00, 26:06:15, 27:06:30, 28:06:45, 29:07:00, 30:07:15, 31:07:30, 32:07:45, 33:08:00, 34:08:15, 35:08:30, 36:08:45, 37:09:00, 38:09:15, 39:09:30, 40:09:45, 41:10:00, 42:10:15, 43:10:30, 44:10:45, 45:11:00, 46:11:15, 47:11:30, 48:11:45, 49:12:00, 50:12:15, 51:12:30, 52:12:45, 53:13:00, 54:13:15, 55:13:30, 56:13:45, 57:14:00, 58:14:15, 59:14:30, 60:14:45, 61:15:00, 62:15:15, 63:15:30, 64:15:45, 65:16:00, 66:16:15, 67:16:30, 68:16:45, 69:17:00, 70:17:15, 71:17:30, 72:17:45, 73:18:00, 74:18:15, 75:18:30, 76:18:45, 77:19:00, 78:19:15, 79:19:30, 80:19:45, 81:20:00, 82:20:15, 83:20:30, 84:20:45, 85:21:00, 86:21:15, 87:21:30, 88:21:45, 89:22:00, 90:22:15, 91:22:30, 92:22:45, 93:23:00, 94:23:15, 95:23:30, 96:23:45

[182] [activity\\_25\\_s: From \*\*activity\\_24\\_s\*\*, what did you do?](#)

Categories: 1:Selling products and/or services in a shop, for self or household member, 2:Selling products and/or services door-to-door, for self or household member, 3:Sourcing and transporting products for trade e.g. day-old chicks, semen straws, feed, drugs etc, 4:Value -addition to the traded product e.g. processing meat, caring for the incubation process, grading etc, 5:Cleaning equipment and premises, 6:Communicating with suppliers, 7:Business group meetings (SACCO or ROSCA meetings, etc), 8:Business or self-employment activities (other than the agri-enterprise) for self or household member, 9:Work as employed, 10:Going to the bank, 11:Bookkeeping, 18:Sleeping and resting, 13:Eating and drinking, 14:Personal care, 15:School (incl. homework), 16:Cooking, 17:Domestic work (incl. fetching water, fuel), 12:Caring for children, 19:Caring for adults (sick, elderly), 20:Commuting (to/from work or school), 21:Traveling (not for work or school), 22:Exercising, 23:Social activities and hobbies, 24:Religious activities, 25:Weaving / sewing / textile care, 26:Farming, crop cultivation,, 27:Livestock raising (cattle, poultry, sheep, etc.), 28:Shopping / getting service (incl. health services), 29:Horticulture

[183] [endtime\\_25\\_s: Until what time? \*\*\(%hrs\\_25\\_s% hours %min\\_25\\_s% minutes\)\*\*](#)

Categories: 1:00:00, 2:00:15, 3:00:30, 4:00:45, 5:01:00, 6:01:15, 7:01:30, 8:01:45, 9:02:00, 10:02:15, 11:02:30, 12:02:45, 13:03:00, 14:03:15, 15:03:30, 16:03:45, 17:04:00, 18:04:15, 19:04:30, 20:04:45, 21:05:00, 22:05:15, 23:05:30, 24:05:45, 25:06:00, 26:06:15, 27:06:30, 28:06:45, 29:07:00, 30:07:15, 31:07:30, 32:07:45, 33:08:00, 34:08:15, 35:08:30, 36:08:45, 37:09:00, 38:09:15, 39:09:30, 40:09:45, 41:10:00, 42:10:15, 43:10:30, 44:10:45, 45:11:00, 46:11:15, 47:11:30, 48:11:45, 49:12:00, 50:12:15, 51:12:30, 52:12:45, 53:13:00, 54:13:15, 55:13:30, 56:13:45, 57:14:00, 58:14:15, 59:14:30, 60:14:45, 61:15:00, 62:15:15, 63:15:30, 64:15:45, 65:16:00, 66:16:15, 67:16:30, 68:16:45, 69:17:00, 70:17:15, 71:17:30, 72:17:45, 73:18:00, 74:18:15, 75:18:30, 76:18:45, 77:19:00, 78:19:15, 79:19:30, 80:19:45, 81:20:00, 82:20:15, 83:20:30, 84:20:45, 85:21:00, 86:21:15, 87:21:30, 88:21:45, 89:22:00, 90:22:15, 91:22:30, 92:22:45, 93:23:00, 94:23:15, 95:23:30, 96:23:45

[184] [activity\\_26\\_s: From \*\*activity\\_25\\_s\*\*, what did you do?](#)

Categories: 1:Selling products and/or services in a shop, for self or household member, 2:Selling products and/or services door-to-door, for self or household member, 3:Sourcing and transporting products for trade e.g. day-old chicks, semen straws, feed, drugs etc, 4:Value -addition to the traded product e.g. processing meat, caring for the incubation process, grading etc, 5:Cleaning equipment and premises, 6:Communicating with suppliers, 7:Business group meetings (SACCO or ROSCA meetings, etc), 8:Business or self-employment activities (other than the agri-enterprise) for self or household member, 9:Work as employed, 10:Going to the bank, 11:Bookkeeping, 18:Sleeping and resting, 13:Eating and drinking, 14:Personal care, 15:School (incl. homework), 16:Cooking, 17:Domestic work (incl. fetching water, fuel), 12:Caring for children, 19:Caring for adults (sick, elderly), 20:Commuting (to/from work or school), 21:Traveling (not for work or school), 22:Exercising, 23:Social activities and hobbies, 24:Religious activities, 25:Weaving / sewing / textile care, 26:Farming, crop cultivation,, 27:Livestock raising (cattle, poultry, sheep, etc.), 28:Shopping / getting service (incl. health services), 29:Horticulture

[185] [endtime\\_26\\_s: Until what time? \*\*\(%hrs\\_26\\_s% hours %min\\_26\\_s% minutes\)\*\*](#)

Categories: 1:00:00, 2:00:15, 3:00:30, 4:00:45, 5:01:00, 6:01:15, 7:01:30, 8:01:45, 9:02:00, 10:02:15, 11:02:30, 12:02:45, 13:03:00, 14:03:15, 15:03:30, 16:03:45, 17:04:00, 18:04:15, 19:04:30, 20:04:45, 21:05:00, 22:05:15, 23:05:30, 24:05:45, 25:06:00, 26:06:15, 27:06:30, 28:06:45, 29:07:00, 30:07:15, 31:07:30, 32:07:45, 33:08:00, 34:08:15, 35:08:30, 36:08:45, 37:09:00, 38:09:15, 39:09:30, 40:09:45, 41:10:00, 42:10:15, 43:10:30, 44:10:45, 45:11:00, 46:11:15, 47:11:30, 48:11:45, 49:12:00, 50:12:15, 51:12:30, 52:12:45, 53:13:00, 54:13:15, 55:13:30, 56:13:45, 57:14:00, 58:14:15, 59:14:30, 60:14:45, 61:15:00, 62:15:15, 63:15:30, 64:15:45, 65:16:00, 66:16:15, 67:16:30, 68:16:45, 69:17:00, 70:17:15, 71:17:30, 72:17:45, 73:18:00, 74:18:15, 75:18:30, 76:18:45, 77:19:00, 78:19:15, 79:19:30, 80:19:45, 81:20:00, 82:20:15, 83:20:30, 84:20:45, 85:21:00, 86:21:15, 87:21:30, 88:21:45, 89:22:00, 90:22:15, 91:22:30, 92:22:45, 93:23:00, 94:23:15, 95:23:30, 96:23:45

[186] [activity\\_27\\_s: From \*\*activity\\_26\\_s\*\*, what did you do?](#)

Categories: 1:Selling products and/or services in a shop, for self or household member, 2:Selling products and/or services door-to-door, for self or household member, 3:Sourcing and transporting products for trade e.g. day-old chicks, semen straws, feed, drugs etc, 4:Value -addition to the traded product e.g. processing meat, caring for the incubation process, grading etc, 5:Cleaning equipment and premises, 6:Communicating with suppliers, 7:Business group meetings (SACCO or ROSCA meetings, etc), 8:Business or self-employment activities (other than the agri-enterprise) for self or household member, 9:Work as employed, 10:Going to the bank, 11:Bookkeeping, 18:Sleeping and resting, 13:Eating and drinking, 14:Personal care, 15:School (incl. homework), 16:Cooking, 17:Domestic work (incl. fetching water, fuel), 12:Caring for children, 19:Caring for adults (sick, elderly), 20:Commuting (to/from work or school), 21:Traveling (not for work or school), 22:Exercising, 23:Social activities and hobbies, 24:Religious activities, 25:Weaving / sewing / textile care, 26:Farming, crop cultivation,, 27:Livestock raising (cattle, poultry, sheep, etc.), 28:Shopping / getting service (incl. health services), 29:Horticulture

[187] [endtime\\_27\\_s: Until what time? \*\*\(%hrs\\_27\\_s% hours %min\\_27\\_s% minutes\)\*\*](#)

Categories: 1:00:00, 2:00:15, 3:00:30, 4:00:45, 5:01:00, 6:01:15, 7:01:30, 8:01:45, 9:02:00, 10:02:15, 11:02:30, 12:02:45, 13:03:00, 14:03:15, 15:03:30, 16:03:45, 17:04:00, 18:04:15, 19:04:30, 20:04:45, 21:05:00, 22:05:15, 23:05:30, 24:05:45, 25:06:00, 26:06:15, 27:06:30, 28:06:45, 29:07:00, 30:07:15, 31:07:30, 32:07:45, 33:08:00, 34:08:15, 35:08:30, 36:08:45, 37:09:00, 38:09:15, 39:09:30, 40:09:45, 41:10:00, 42:10:15, 43:10:30, 44:10:45, 45:11:00, 46:11:15, 47:11:30, 48:11:45, 49:12:00, 50:12:15, 51:12:30, 52:12:45, 53:13:00, 54:13:15, 55:13:30, 56:13:45, 57:14:00, 58:14:15, 59:14:30, 60:14:45, 61:15:00, 62:15:15, 63:15:30, 64:15:45, 65:16:00, 66:16:15, 67:16:30, 68:16:45, 69:17:00, 70:17:15, 71:17:30, 72:17:45, 73:18:00, 74:18:15, 75:18:30, 76:18:45, 77:19:00, 78:19:15, 79:19:30, 80:19:45, 81:20:00, 82:20:15, 83:20:30, 84:20:45, 85:21:00, 86:21:15, 87:21:30, 88:21:45, 89:22:00, 90:22:15, 91:22:30, 92:22:45, 93:23:00, 94:23:15, 95:23:30, 96:23:45

[188] [activity\\_28\\_s: From \*\*activity\\_27\\_s\*\*, what did you do?](#)

Categories: 1:Selling products and/or services in a shop, for self or household member, 2:Selling products and/or services door-to-door, for self or household member, 3:Sourcing and transporting products for trade e.g. day-old chicks, semen straws, feed, drugs etc, 4:Value -addition to the traded product e.g. processing meat, caring for the incubation process, grading etc, 5:Cleaning equipment and premises, 6:Communicating with suppliers, 7:Business group meetings (SACCO or ROSCA meetings, etc), 8:Business or self-employment activities (other than the agri-enterprise) for self or household member, 9:Work as employed, 10:Going to the bank, 11:Bookkeeping, 18:Sleeping and resting, 13:Eating and drinking, 14:Personal care, 15:School (incl. homework), 16:Cooking, 17:Domestic work (incl. fetching water, fuel), 12:Caring for children, 19:Caring for adults (sick, elderly), 20:Commuting (to/from work or school), 21:Traveling (not for work or school), 22:Exercising, 23:Social activities and hobbies, 24:Religious activities, 25:Weaving / sewing / textile care, 26:Farming, crop cultivation,, 27:Livestock raising (cattle, poultry, sheep, etc.), 28:Shopping / getting service (incl. health services), 29:Horticulture

[189] [endtime\\_28\\_s: Until what time? \*\*\(%hrs\\_28\\_s% hours %min\\_28\\_s% minutes\)\*\*](#)

Categories: 1:00:00, 2:00:15, 3:00:30, 4:00:45, 5:01:00, 6:01:15, 7:01:30, 8:01:45, 9:02:00, 10:02:15, 11:02:30, 12:02:45, 13:03:00, 14:03:15, 15:03:30, 16:03:45, 17:04:00, 18:04:15, 19:04:30, 20:04:45, 21:05:00, 22:05:15, 23:05:30, 24:05:45, 25:06:00, 26:06:15, 27:06:30, 28:06:45, 29:07:00, 30:07:15, 31:07:30, 32:07:45, 33:08:00, 34:08:15, 35:08:30, 36:08:45, 37:09:00, 38:09:15, 39:09:30, 40:09:45, 41:10:00, 42:10:15, 43:10:30, 44:10:45, 45:11:00, 46:11:15, 47:11:30, 48:11:45, 49:12:00, 50:12:15, 51:12:30, 52:12:45, 53:13:00, 54:13:15, 55:13:30, 56:13:45, 57:14:00, 58:14:15, 59:14:30, 60:14:45, 61:15:00, 62:15:15, 63:15:30, 64:15:45, 65:16:00, 66:16:15, 67:16:30, 68:16:45, 69:17:00, 70:17:15, 71:17:30, 72:17:45, 73:18:00, 74:18:15, 75:18:30, 76:18:45, 77:19:00, 78:19:15, 79:19:30, 80:19:45, 81:20:00, 82:20:15, 83:20:30, 84:20:45, 85:21:00, 86:21:15, 87:21:30, 88:21:45, 89:22:00, 90:22:15, 91:22:30, 92:22:45, 93:23:00, 94:23:15, 95:23:30, 96:23:45

[190] [activity\\_29\\_s: From \*\*activity\\_28\\_s\*\*, what did you do?](#)

Categories: 1:Selling products and/or services in a shop, for self or household member, 2:Selling products and/or services door-to-door, for self or household member, 3:Sourcing and transporting products for trade e.g. day-old chicks, semen straws, feed, drugs etc, 4:Value -addition to the traded product e.g. processing meat, caring for the incubation process, grading etc, 5:Cleaning equipment and premises, 6:Communicating with suppliers, 7:Business group meetings (SACCO or ROSCA meetings, etc), 8:Business or self-employment activities (other than the agri-enterprise) for self or household member, 9:Work as employed, 10:Going to the bank, 11:Bookkeeping, 18:Sleeping and resting, 13:Eating and drinking, 14:Personal care, 15:School (incl. homework), 16:Cooking, 17:Domestic work (incl. fetching water, fuel), 12:Caring for children, 19:Caring for adults (sick, elderly), 20:Commuting (to/from work or school), 21:Traveling (not for work or school), 22:Exercising, 23:Social activities and hobbies, 24:Religious activities, 25:Weaving / sewing / textile care, 26:Farming, crop cultivation,, 27:Livestock raising (cattle, poultry, sheep, etc.), 28:Shopping / getting service (incl. health services), 29:Horticulture

[191] [endtime\\_29\\_s: Until what time? \*\*\(%hrs\\_29\\_s% hours %min\\_29\\_s% minutes\)\*\*](#)

Categories: 1:00:00, 2:00:15, 3:00:30, 4:00:45, 5:01:00, 6:01:15, 7:01:30, 8:01:45, 9:02:00, 10:02:15, 11:02:30, 12:02:45, 13:03:00, 14:03:15, 15:03:30, 16:03:45, 17:04:00, 18:04:15, 19:04:30, 20:04:45, 21:05:00, 22:05:15, 23:05:30, 24:05:45, 25:06:00, 26:06:15, 27:06:30, 28:06:45, 29:07:00, 30:07:15, 31:07:30, 32:07:45, 33:08:00, 34:08:15, 35:08:30, 36:08:45, 37:09:00, 38:09:15, 39:09:30, 40:09:45, 41:10:00, 42:10:15, 43:10:30, 44:10:45, 45:11:00, 46:11:15, 47:11:30, 48:11:45, 49:12:00, 50:12:15, 51:12:30, 52:12:45, 53:13:00, 54:13:15, 55:13:30, 56:13:45, 57:14:00, 58:14:15, 59:14:30, 60:14:45, 61:15:00, 62:15:15, 63:15:30, 64:15:45, 65:16:00, 66:16:15, 67:16:30, 68:16:45, 69:17:00, 70:17:15, 71:17:30, 72:17:45, 73:18:00, 74:18:15, 75:18:30, 76:18:45, 77:19:00, 78:19:15, 79:19:30, 80:19:45, 81:20:00, 82:20:15, 83:20:30, 84:20:45, 85:21:00, 86:21:15, 87:21:30, 88:21:45, 89:22:00, 90:22:15, 91:22:30, 92:22:45, 93:23:00, 94:23:15, 95:23:30, 96:23:45

[192] [activity\\_30\\_s: From \*\*activity\\_29\\_s\*\*, what did you do?](#)

Categories: 1:Selling products and/or services in a shop, for self or household member, 2:Selling products and/or services door-to-door, for self or household member, 3:Sourcing and transporting products for trade e.g. day-old chicks, semen straws, feed, drugs etc, 4:Value -addition to the traded product e.g. processing meat, caring for the incubation process, grading etc, 5:Cleaning equipment and premises, 6:Communicating with suppliers, 7:Business group meetings (SACCO or ROSCA meetings, etc), 8:Business or self-employment activities (other than the agri-enterprise) for self or household member, 9:Work as employed, 10:Going to the bank, 11:Bookkeeping, 18:Sleeping and resting, 13:Eating and drinking, 14:Personal care, 15:School (incl. homework), 16:Cooking, 17:Domestic work (incl. fetching water, fuel), 12:Caring for children, 19:Caring for adults (sick, elderly), 20:Commuting (to/from work or school), 21:Traveling (not for work or school), 22:Exercising, 23:Social activities and hobbies, 24:Religious activities, 25:Weaving / sewing / textile care, 26:Farming, crop cultivation,, 27:Livestock raising (cattle, poultry, sheep, etc.), 28:Shopping / getting service (incl. health services), 29:Horticulture

[193] [endtime\\_30\\_s: Until what time? \*\*\(%hrs\\_30\\_s% hours %min\\_30\\_s% minutes\)\*\*](#)

Categories: 1:00:00, 2:00:15, 3:00:30, 4:00:45, 5:01:00, 6:01:15, 7:01:30, 8:01:45, 9:02:00, 10:02:15, 11:02:30, 12:02:45, 13:03:00, 14:03:15, 15:03:30, 16:03:45, 17:04:00, 18:04:15, 19:04:30, 20:04:45, 21:05:00, 22:05:15, 23:05:30, 24:05:45, 25:06:00, 26:06:15, 27:06:30, 28:06:45, 29:07:00, 30:07:15, 31:07:30, 32:07:45, 33:08:00, 34:08:15, 35:08:30, 36:08:45, 37:09:00, 38:09:15, 39:09:30, 40:09:45, 41:10:00, 42:10:15, 43:10:30, 44:10:45, 45:11:00, 46:11:15, 47:11:30, 48:11:45, 49:12:00, 50:12:15, 51:12:30, 52:12:45, 53:13:00, 54:13:15, 55:13:30, 56:13:45, 57:14:00, 58:14:15, 59:14:30, 60:14:45, 61:15:00, 62:15:15, 63:15:30, 64:15:45, 65:16:00, 66:16:15, 67:16:30, 68:16:45, 69:17:00, 70:17:15, 71:17:30, 72:17:45, 73:18:00, 74:18:15, 75:18:30, 76:18:45, 77:19:00, 78:19:15, 79:19:30, 80:19:45, 81:20:00, 82:20:15, 83:20:30, 84:20:45, 85:21:00, 86:21:15, 87:21:30, 88:21:45, 89:22:00, 90:22:15, 91:22:30, 92:22:45, 93:23:00, 94:23:15, 95:23:30, 96:23:45

[194] [activity\\_31\\_s: From \*\*activity\\_30\\_s\*\*, what did you do?](#)

Categories: 1:Selling products and/or services in a shop, for self or household member, 2:Selling products and/or services door-to-door, for self or household member, 3:Sourcing and transporting products for trade e.g. day-old chicks, semen straws, feed, drugs etc, 4:Value -addition to the traded product e.g. processing meat, caring for the incubation process, grading etc, 5:Cleaning equipment and premises, 6:Communicating with suppliers, 7:Business group meetings (SACCO or ROSCA meetings, etc), 8:Business or self-employment activities (other than the agri-enterprise) for self or household member, 9:Work as employed, 10:Going to the bank, 11:Bookkeeping, 18:Sleeping and resting, 13:Eating and drinking, 14:Personal care, 15:School (incl. homework), 16:Cooking, 17:Domestic work (incl. fetching water, fuel), 12:Caring for children, 19:Caring for adults (sick, elderly), 20:Commuting (to/from work or school), 21:Traveling (not for work or school), 22:Exercising, 23:Social activities and hobbies, 24:Religious activities, 25:Weaving / sewing / textile care, 26:Farming, crop cultivation,, 27:Livestock raising (cattle, poultry, sheep, etc.), 28:Shopping / getting service (incl. health services), 29:Horticulture

[195] [endtime\\_31\\_s: Until what time? \*\*\(%hrs\\_31\\_s% hours %min\\_31\\_s% minutes\)\*\*](#)

Categories: 1:00:00, 2:00:15, 3:00:30, 4:00:45, 5:01:00, 6:01:15, 7:01:30, 8:01:45, 9:02:00, 10:02:15, 11:02:30, 12:02:45, 13:03:00, 14:03:15, 15:03:30, 16:03:45, 17:04:00, 18:04:15, 19:04:30, 20:04:45, 21:05:00, 22:05:15, 23:05:30, 24:05:45, 25:06:00, 26:06:15, 27:06:30, 28:06:45, 29:07:00, 30:07:15, 31:07:30, 32:07:45, 33:08:00, 34:08:15, 35:08:30, 36:08:45, 37:09:00, 38:09:15, 39:09:30, 40:09:45, 41:10:00, 42:10:15, 43:10:30, 44:10:45, 45:11:00, 46:11:15, 47:11:30, 48:11:45, 49:12:00, 50:12:15, 51:12:30, 52:12:45, 53:13:00, 54:13:15, 55:13:30, 56:13:45, 57:14:00, 58:14:15, 59:14:30, 60:14:45, 61:15:00, 62:15:15, 63:15:30, 64:15:45, 65:16:00, 66:16:15, 67:16:30, 68:16:45, 69:17:00, 70:17:15, 71:17:30, 72:17:45, 73:18:00, 74:18:15, 75:18:30, 76:18:45, 77:19:00, 78:19:15, 79:19:30, 80:19:45, 81:20:00, 82:20:15, 83:20:30, 84:20:45, 85:21:00, 86:21:15, 87:21:30, 88:21:45, 89:22:00, 90:22:15, 91:22:30, 92:22:45, 93:23:00, 94:23:15, 95:23:30, 96:23:45

[196] [activity\\_32\\_s: From \*\*activity\\_31\\_s\*\*, what did you do?](#)

Categories: 1:Selling products and/or services in a shop, for self or household member, 2:Selling products and/or services door-to-door, for self or household member, 3:Sourcing and transporting products for trade e.g. day-old chicks, semen straws, feed, drugs etc, 4:Value -addition to the traded product e.g. processing meat, caring for the incubation process, grading etc, 5:Cleaning equipment and premises, 6:Communicating with suppliers, 7:Business group meetings (SACCO or ROSCA meetings, etc), 8:Business or self-employment activities (other than the agri-enterprise) for self or household member, 9:Work as employed, 10:Going to the bank, 11:Bookkeeping, 18:Sleeping and resting, 13:Eating and drinking, 14:Personal care, 15:School (incl. homework), 16:Cooking, 17:Domestic work (incl. fetching water, fuel), 12:Caring for children, 19:Caring for adults (sick, elderly), 20:Commuting (to/from work or school), 21:Traveling (not for work or school), 22:Exercising, 23:Social activities and hobbies, 24:Religious activities, 25:Weaving / sewing / textile care, 26:Farming, crop cultivation,, 27:Livestock raising (cattle, poultry, sheep, etc.), 28:Shopping / getting service (incl. health services), 29:Horticulture

[197] [endtime\\_32\\_s: Until what time? \*\*\(%hrs\\_32\\_s% hours %min\\_32\\_s% minutes\)\*\*](#)

Categories: 1:00:00, 2:00:15, 3:00:30, 4:00:45, 5:01:00, 6:01:15, 7:01:30, 8:01:45, 9:02:00, 10:02:15, 11:02:30, 12:02:45, 13:03:00, 14:03:15, 15:03:30, 16:03:45, 17:04:00, 18:04:15, 19:04:30, 20:04:45, 21:05:00, 22:05:15, 23:05:30, 24:05:45, 25:06:00, 26:06:15, 27:06:30, 28:06:45, 29:07:00, 30:07:15, 31:07:30, 32:07:45, 33:08:00, 34:08:15, 35:08:30, 36:08:45, 37:09:00, 38:09:15, 39:09:30, 40:09:45, 41:10:00, 42:10:15, 43:10:30, 44:10:45, 45:11:00, 46:11:15, 47:11:30, 48:11:45, 49:12:00, 50:12:15, 51:12:30, 52:12:45, 53:13:00, 54:13:15, 55:13:30, 56:13:45, 57:14:00, 58:14:15, 59:14:30, 60:14:45, 61:15:00, 62:15:15, 63:15:30, 64:15:45, 65:16:00, 66:16:15, 67:16:30, 68:16:45, 69:17:00, 70:17:15, 71:17:30, 72:17:45, 73:18:00, 74:18:15, 75:18:30, 76:18:45, 77:19:00, 78:19:15, 79:19:30, 80:19:45, 81:20:00, 82:20:15, 83:20:30, 84:20:45, 85:21:00, 86:21:15, 87:21:30, 88:21:45, 89:22:00, 90:22:15, 91:22:30, 92:22:45, 93:23:00, 94:23:15, 95:23:30, 96:23:45

[198] [activity\\_33\\_s: From \*\*activity\\_32\\_s\*\*, what did you do?](#)

Categories: 1:Selling products and/or services in a shop, for self or household member, 2:Selling products and/or services door-to-door, for self or household member, 3:Sourcing and transporting products for trade e.g. day-old chicks, semen straws, feed, drugs etc, 4:Value -addition to the traded product e.g. processing meat, caring for the incubation process, grading etc, 5:Cleaning equipment and premises, 6:Communicating with suppliers, 7:Business group meetings (SACCO or ROSCA meetings, etc), 8:Business or self-employment activities (other than the agri-enterprise) for self or household member, 9:Work as employed, 10:Going to the bank, 11:Bookkeeping, 18:Sleeping and resting, 13:Eating and drinking, 14:Personal care, 15:School (incl. homework), 16:Cooking, 17:Domestic work (incl. fetching water, fuel), 12:Caring for children, 19:Caring for adults (sick, elderly), 20:Commuting (to/from work or school), 21:Traveling (not for work or school), 22:Exercising, 23:Social activities and hobbies, 24:Religious activities, 25:Weaving / sewing / textile care, 26:Farming, crop cultivation,, 27:Livestock raising (cattle, poultry, sheep, etc.), 28:Shopping / getting service (incl. health services), 29:Horticulture

[199] [endtime\\_33\\_s: Until what time? \*\*\(%hrs\\_33\\_s% hours %min\\_33\\_s% minutes\)\*\*](#)

Categories: 1:00:00, 2:00:15, 3:00:30, 4:00:45, 5:01:00, 6:01:15, 7:01:30, 8:01:45, 9:02:00, 10:02:15, 11:02:30, 12:02:45, 13:03:00, 14:03:15, 15:03:30, 16:03:45, 17:04:00, 18:04:15, 19:04:30, 20:04:45, 21:05:00, 22:05:15, 23:05:30, 24:05:45, 25:06:00, 26:06:15, 27:06:30, 28:06:45, 29:07:00, 30:07:15, 31:07:30, 32:07:45, 33:08:00, 34:08:15, 35:08:30, 36:08:45, 37:09:00, 38:09:15, 39:09:30, 40:09:45, 41:10:00, 42:10:15, 43:10:30, 44:10:45, 45:11:00, 46:11:15, 47:11:30, 48:11:45, 49:12:00, 50:12:15, 51:12:30, 52:12:45, 53:13:00, 54:13:15, 55:13:30, 56:13:45, 57:14:00, 58:14:15, 59:14:30, 60:14:45, 61:15:00, 62:15:15, 63:15:30, 64:15:45, 65:16:00, 66:16:15, 67:16:30, 68:16:45, 69:17:00, 70:17:15, 71:17:30, 72:17:45, 73:18:00, 74:18:15, 75:18:30, 76:18:45, 77:19:00, 78:19:15, 79:19:30, 80:19:45, 81:20:00, 82:20:15, 83:20:30, 84:20:45, 85:21:00, 86:21:15, 87:21:30, 88:21:45, 89:22:00, 90:22:15, 91:22:30, 92:22:45, 93:23:00, 94:23:15, 95:23:30, 96:23:45

[200] [activity\\_34\\_s: From \*\*activity\\_33\\_s\*\*, what did you do?](#)

Categories: 1:Selling products and/or services in a shop, for self or household member, 2:Selling products and/or services door-to-door, for self or household member, 3:Sourcing and transporting products for trade e.g. day-old chicks, semen straws, feed, drugs etc, 4:Value -addition to the traded product e.g. processing meat, caring for the incubation process, grading etc, 5:Cleaning equipment and premises, 6:Communicating with suppliers, 7:Business group meetings (SACCO or ROSCA meetings, etc), 8:Business or self-employment activities (other than the agri-enterprise) for self or household member, 9:Work as employed, 10:Going to the bank, 11:Bookkeeping, 18:Sleeping and resting, 13:Eating and drinking, 14:Personal care, 15:School (incl. homework), 16:Cooking, 17:Domestic work (incl. fetching water, fuel), 12:Caring for children, 19:Caring for adults (sick, elderly), 20:Commuting (to/from work or school), 21:Traveling (not for work or school), 22:Exercising, 23:Social activities and hobbies, 24:Religious activities, 25:Weaving / sewing / textile care, 26:Farming, crop cultivation,, 27:Livestock raising (cattle, poultry, sheep, etc.), 28:Shopping / getting service (incl. health services), 29:Horticulture

[201] [endtime\\_34\\_s: Until what time? \*\*\(%hrs\\_34\\_s% hours %min\\_34\\_s% minutes\)\*\*](#)

Categories: 1:00:00, 2:00:15, 3:00:30, 4:00:45, 5:01:00, 6:01:15, 7:01:30, 8:01:45, 9:02:00, 10:02:15, 11:02:30, 12:02:45, 13:03:00, 14:03:15, 15:03:30, 16:03:45, 17:04:00, 18:04:15, 19:04:30, 20:04:45, 21:05:00, 22:05:15, 23:05:30, 24:05:45, 25:06:00, 26:06:15, 27:06:30, 28:06:45, 29:07:00, 30:07:15, 31:07:30, 32:07:45, 33:08:00, 34:08:15, 35:08:30, 36:08:45, 37:09:00, 38:09:15, 39:09:30, 40:09:45, 41:10:00, 42:10:15, 43:10:30, 44:10:45, 45:11:00, 46:11:15, 47:11:30, 48:11:45, 49:12:00, 50:12:15, 51:12:30, 52:12:45, 53:13:00, 54:13:15, 55:13:30, 56:13:45, 57:14:00, 58:14:15, 59:14:30, 60:14:45, 61:15:00, 62:15:15, 63:15:30, 64:15:45, 65:16:00, 66:16:15, 67:16:30, 68:16:45, 69:17:00, 70:17:15, 71:17:30, 72:17:45, 73:18:00, 74:18:15, 75:18:30, 76:18:45, 77:19:00, 78:19:15, 79:19:30, 80:19:45, 81:20:00, 82:20:15, 83:20:30, 84:20:45, 85:21:00, 86:21:15, 87:21:30, 88:21:45, 89:22:00, 90:22:15, 91:22:30, 92:22:45, 93:23:00, 94:23:15, 95:23:30, 96:23:45

[202] [activity\\_35\\_s: From \*\*activity\\_34\\_s\*\*, what did you do?](#)

Categories: 1:Selling products and/or services in a shop, for self or household member, 2:Selling products and/or services door-to-door, for self or household member, 3:Sourcing and transporting products for trade e.g. day-old chicks, semen straws, feed, drugs etc, 4:Value -addition to the traded product e.g. processing meat, caring for the incubation process, grading etc, 5:Cleaning equipment and premises, 6:Communicating with suppliers, 7:Business group meetings (SACCO or ROSCA meetings, etc), 8:Business or self-employment activities (other than the agri-enterprise) for self or household member, 9:Work as employed, 10:Going to the bank, 11:Bookkeeping, 18:Sleeping and resting, 13:Eating and drinking, 14:Personal care, 15:School (incl. homework), 16:Cooking, 17:Domestic work (incl. fetching water, fuel), 12:Caring for children, 19:Caring for adults (sick, elderly), 20:Commuting (to/from work or school), 21:Traveling (not for work or school), 22:Exercising, 23:Social activities and hobbies, 24:Religious activities, 25:Weaving / sewing / textile care, 26:Farming, crop cultivation,, 27:Livestock raising (cattle, poultry, sheep, etc.), 28:Shopping / getting service (incl. health services), 29:Horticulture

[203] [endtime\\_35\\_s: Until what time? \*\*\(%hrs\\_35\\_s% hours %min\\_35\\_s% minutes\)\*\*](#)

Categories: 1:00:00, 2:00:15, 3:00:30, 4:00:45, 5:01:00, 6:01:15, 7:01:30, 8:01:45, 9:02:00, 10:02:15, 11:02:30, 12:02:45, 13:03:00, 14:03:15, 15:03:30, 16:03:45, 17:04:00, 18:04:15, 19:04:30, 20:04:45, 21:05:00, 22:05:15, 23:05:30, 24:05:45, 25:06:00, 26:06:15, 27:06:30, 28:06:45, 29:07:00, 30:07:15, 31:07:30, 32:07:45, 33:08:00, 34:08:15, 35:08:30, 36:08:45, 37:09:00, 38:09:15, 39:09:30, 40:09:45, 41:10:00, 42:10:15, 43:10:30, 44:10:45, 45:11:00, 46:11:15, 47:11:30, 48:11:45, 49:12:00, 50:12:15, 51:12:30, 52:12:45, 53:13:00, 54:13:15, 55:13:30, 56:13:45, 57:14:00, 58:14:15, 59:14:30, 60:14:45, 61:15:00, 62:15:15, 63:15:30, 64:15:45, 65:16:00, 66:16:15, 67:16:30, 68:16:45, 69:17:00, 70:17:15, 71:17:30, 72:17:45, 73:18:00, 74:18:15, 75:18:30, 76:18:45, 77:19:00, 78:19:15, 79:19:30, 80:19:45, 81:20:00, 82:20:15, 83:20:30, 84:20:45, 85:21:00, 86:21:15, 87:21:30, 88:21:45, 89:22:00, 90:22:15, 91:22:30, 92:22:45, 93:23:00, 94:23:15, 95:23:30, 96:23:45

[204] [activity\\_36\\_s: From \*\*activity\\_35\\_s\*\*, what did you do?](#)

Categories: 1:Selling products and/or services in a shop, for self or household member, 2:Selling products and/or services door-to-door, for self or household member, 3:Sourcing and transporting products for trade e.g. day-old chicks, semen straws, feed, drugs etc, 4:Value -addition to the traded product e.g. processing meat, caring for the incubation process, grading etc, 5:Cleaning equipment and premises, 6:Communicating with suppliers, 7:Business group meetings (SACCO or ROSCA meetings, etc), 8:Business or self-employment activities (other than the agri-enterprise) for self or household member, 9:Work as employed, 10:Going to the bank, 11:Bookkeeping, 18:Sleeping and resting, 13:Eating and drinking, 14:Personal care, 15:School (incl. homework), 16:Cooking, 17:Domestic work (incl. fetching water, fuel), 12:Caring for children, 19:Caring for adults (sick, elderly), 20:Commuting (to/from work or school), 21:Traveling (not for work or school), 22:Exercising, 23:Social activities and hobbies, 24:Religious activities, 25:Weaving / sewing / textile care, 26:Farming, crop cultivation,, 27:Livestock raising (cattle, poultry, sheep, etc.), 28:Shopping / getting service (incl. health services), 29:Horticulture

[205] [endtime\\_36\\_s: Until what time? \*\*\(%hrs\\_36\\_s% hours %min\\_36\\_s% minutes\)\*\*](#)

Categories: 1:00:00, 2:00:15, 3:00:30, 4:00:45, 5:01:00, 6:01:15, 7:01:30, 8:01:45, 9:02:00, 10:02:15, 11:02:30, 12:02:45, 13:03:00, 14:03:15, 15:03:30, 16:03:45, 17:04:00, 18:04:15, 19:04:30, 20:04:45, 21:05:00, 22:05:15, 23:05:30, 24:05:45, 25:06:00, 26:06:15, 27:06:30, 28:06:45, 29:07:00, 30:07:15, 31:07:30, 32:07:45, 33:08:00, 34:08:15, 35:08:30, 36:08:45, 37:09:00, 38:09:15, 39:09:30, 40:09:45, 41:10:00, 42:10:15, 43:10:30, 44:10:45, 45:11:00, 46:11:15, 47:11:30, 48:11:45, 49:12:00, 50:12:15, 51:12:30, 52:12:45, 53:13:00, 54:13:15, 55:13:30, 56:13:45, 57:14:00, 58:14:15, 59:14:30, 60:14:45, 61:15:00, 62:15:15, 63:15:30, 64:15:45, 65:16:00, 66:16:15, 67:16:30, 68:16:45, 69:17:00, 70:17:15, 71:17:30, 72:17:45, 73:18:00, 74:18:15, 75:18:30, 76:18:45, 77:19:00, 78:19:15, 79:19:30, 80:19:45, 81:20:00, 82:20:15, 83:20:30, 84:20:45, 85:21:00, 86:21:15, 87:21:30, 88:21:45, 89:22:00, 90:22:15, 91:22:30, 92:22:45, 93:23:00, 94:23:15, 95:23:30, 96:23:45

[206] [activity\\_37\\_s: From \*\*activity\\_36\\_s\*\*, what did you do?](#)

Categories: 1:Selling products and/or services in a shop, for self or household member, 2:Selling products and/or services door-to-door, for self or household member, 3:Sourcing and transporting products for trade e.g. day-old chicks, semen straws, feed, drugs etc, 4:Value -addition to the traded product e.g. processing meat, caring for the incubation process, grading etc, 5:Cleaning equipment and premises, 6:Communicating with suppliers, 7:Business group meetings (SACCO or ROSCA meetings, etc), 8:Business or self-employment activities (other than the agri-enterprise) for self or household member, 9:Work as employed, 10:Going to the bank, 11:Bookkeeping, 18:Sleeping and resting, 13:Eating and drinking, 14:Personal care, 15:School (incl. homework), 16:Cooking, 17:Domestic work (incl. fetching water, fuel), 12:Caring for children, 19:Caring for adults (sick, elderly), 20:Commuting (to/from work or school), 21:Traveling (not for work or school), 22:Exercising, 23:Social activities and hobbies, 24:Religious activities, 25:Weaving / sewing / textile care, 26:Farming, crop cultivation,, 27:Livestock raising (cattle, poultry, sheep, etc.), 28:Shopping / getting service (incl. health services), 29:Horticulture

[207] [endtime\\_37\\_s: Until what time? \*\*\(%hrs\\_37\\_s% hours %min\\_37\\_s% minutes\)\*\*](#)

Categories: 1:00:00, 2:00:15, 3:00:30, 4:00:45, 5:01:00, 6:01:15, 7:01:30, 8:01:45, 9:02:00, 10:02:15, 11:02:30, 12:02:45, 13:03:00, 14:03:15, 15:03:30, 16:03:45, 17:04:00, 18:04:15, 19:04:30, 20:04:45, 21:05:00, 22:05:15, 23:05:30, 24:05:45, 25:06:00, 26:06:15, 27:06:30, 28:06:45, 29:07:00, 30:07:15, 31:07:30, 32:07:45, 33:08:00, 34:08:15, 35:08:30, 36:08:45, 37:09:00, 38:09:15, 39:09:30, 40:09:45, 41:10:00, 42:10:15, 43:10:30, 44:10:45, 45:11:00, 46:11:15, 47:11:30, 48:11:45, 49:12:00, 50:12:15, 51:12:30, 52:12:45, 53:13:00, 54:13:15, 55:13:30, 56:13:45, 57:14:00, 58:14:15, 59:14:30, 60:14:45, 61:15:00, 62:15:15, 63:15:30, 64:15:45, 65:16:00, 66:16:15, 67:16:30, 68:16:45, 69:17:00, 70:17:15, 71:17:30, 72:17:45, 73:18:00, 74:18:15, 75:18:30, 76:18:45, 77:19:00, 78:19:15, 79:19:30, 80:19:45, 81:20:00, 82:20:15, 83:20:30, 84:20:45, 85:21:00, 86:21:15, 87:21:30, 88:21:45, 89:22:00, 90:22:15, 91:22:30, 92:22:45, 93:23:00, 94:23:15, 95:23:30, 96:23:45

[208] [activity\\_38\\_s: From \*\*activity\\_37\\_s\*\*, what did you do?](#)

Categories: 1:Selling products and/or services in a shop, for self or household member, 2:Selling products and/or services door-to-door, for self or household member, 3:Sourcing and transporting products for trade e.g. day-old chicks, semen straws, feed, drugs etc, 4:Value -addition to the traded product e.g. processing meat, caring for the incubation process, grading etc, 5:Cleaning equipment and premises, 6:Communicating with suppliers, 7:Business group meetings (SACCO or ROSCA meetings, etc), 8:Business or self-employment activities (other than the agri-enterprise) for self or household member, 9:Work as employed, 10:Going to the bank, 11:Bookkeeping, 18:Sleeping and resting, 13:Eating and drinking, 14:Personal care, 15:School (incl. homework), 16:Cooking, 17:Domestic work (incl. fetching water, fuel), 12:Caring for children, 19:Caring for adults (sick, elderly), 20:Commuting (to/from work or school), 21:Traveling (not for work or school), 22:Exercising, 23:Social activities and hobbies, 24:Religious activities, 25:Weaving / sewing / textile care, 26:Farming, crop cultivation,, 27:Livestock raising (cattle, poultry, sheep, etc.), 28:Shopping / getting service (incl. health services), 29:Horticulture

[209] [endtime\\_38\\_s: Until what time? \*\*\(%hrs\\_38\\_s% hours %min\\_38\\_s% minutes\)\*\*](#)

Categories: 1:00:00, 2:00:15, 3:00:30, 4:00:45, 5:01:00, 6:01:15, 7:01:30, 8:01:45, 9:02:00, 10:02:15, 11:02:30, 12:02:45, 13:03:00, 14:03:15, 15:03:30, 16:03:45, 17:04:00, 18:04:15, 19:04:30, 20:04:45, 21:05:00, 22:05:15, 23:05:30, 24:05:45, 25:06:00, 26:06:15, 27:06:30, 28:06:45, 29:07:00, 30:07:15, 31:07:30, 32:07:45, 33:08:00, 34:08:15, 35:08:30, 36:08:45, 37:09:00, 38:09:15, 39:09:30, 40:09:45, 41:10:00, 42:10:15, 43:10:30, 44:10:45, 45:11:00, 46:11:15, 47:11:30, 48:11:45, 49:12:00, 50:12:15, 51:12:30, 52:12:45, 53:13:00, 54:13:15, 55:13:30, 56:13:45, 57:14:00, 58:14:15, 59:14:30, 60:14:45, 61:15:00, 62:15:15, 63:15:30, 64:15:45, 65:16:00, 66:16:15, 67:16:30, 68:16:45, 69:17:00, 70:17:15, 71:17:30, 72:17:45, 73:18:00, 74:18:15, 75:18:30, 76:18:45, 77:19:00, 78:19:15, 79:19:30, 80:19:45, 81:20:00, 82:20:15, 83:20:30, 84:20:45, 85:21:00, 86:21:15, 87:21:30, 88:21:45, 89:22:00, 90:22:15, 91:22:30, 92:22:45, 93:23:00, 94:23:15, 95:23:30, 96:23:45

[210] [activity\\_39\\_s: From \*\*activity\\_38\\_s\*\*, what did you do?](#)

Categories: 1:Selling products and/or services in a shop, for self or household member, 2:Selling products and/or services door-to-door, for self or household member, 3:Sourcing and transporting products for trade e.g. day-old chicks, semen straws, feed, drugs etc, 4:Value -addition to the traded product e.g. processing meat, caring for the incubation process, grading etc, 5:Cleaning equipment and premises, 6:Communicating with suppliers, 7:Business group meetings (SACCO or ROSCA meetings, etc), 8:Business or self-employment activities (other than the agri-enterprise) for self or household member, 9:Work as employed, 10:Going to the bank, 11:Bookkeeping, 18:Sleeping and resting, 13:Eating and drinking, 14:Personal care, 15:School (incl. homework), 16:Cooking, 17:Domestic work (incl. fetching water, fuel), 12:Caring for children, 19:Caring for adults (sick, elderly), 20:Commuting (to/from work or school), 21:Traveling (not for work or school), 22:Exercising, 23:Social activities and hobbies, 24:Religious activities, 25:Weaving / sewing / textile care, 26:Farming, crop cultivation,, 27:Livestock raising (cattle, poultry, sheep, etc.), 28:Shopping / getting service (incl. health services), 29:Horticulture

[211] [endtime\\_39\\_s: Until what time? \*\*\(%hrs\\_39\\_s% hours %min\\_39\\_s% minutes\)\*\*](#)

Categories: 1:00:00, 2:00:15, 3:00:30, 4:00:45, 5:01:00, 6:01:15, 7:01:30, 8:01:45, 9:02:00, 10:02:15, 11:02:30, 12:02:45, 13:03:00, 14:03:15, 15:03:30, 16:03:45, 17:04:00, 18:04:15, 19:04:30, 20:04:45, 21:05:00, 22:05:15, 23:05:30, 24:05:45, 25:06:00, 26:06:15, 27:06:30, 28:06:45, 29:07:00, 30:07:15, 31:07:30, 32:07:45, 33:08:00, 34:08:15, 35:08:30, 36:08:45, 37:09:00, 38:09:15, 39:09:30, 40:09:45, 41:10:00, 42:10:15, 43:10:30, 44:10:45, 45:11:00, 46:11:15, 47:11:30, 48:11:45, 49:12:00, 50:12:15, 51:12:30, 52:12:45, 53:13:00, 54:13:15, 55:13:30, 56:13:45, 57:14:00, 58:14:15, 59:14:30, 60:14:45, 61:15:00, 62:15:15, 63:15:30, 64:15:45, 65:16:00, 66:16:15, 67:16:30, 68:16:45, 69:17:00, 70:17:15, 71:17:30, 72:17:45, 73:18:00, 74:18:15, 75:18:30, 76:18:45, 77:19:00, 78:19:15, 79:19:30, 80:19:45, 81:20:00, 82:20:15, 83:20:30, 84:20:45, 85:21:00, 86:21:15, 87:21:30, 88:21:45, 89:22:00, 90:22:15, 91:22:30, 92:22:45, 93:23:00, 94:23:15, 95:23:30, 96:23:45

[212] [activity\\_40\\_s: From \*\*activity\\_39\\_s\*\*, what did you do?](#)

Categories: 1:Selling products and/or services in a shop, for self or household member, 2:Selling products and/or services door-to-door, for self or household member, 3:Sourcing and transporting products for trade e.g. day-old chicks, semen straws, feed, drugs etc, 4:Value -addition to the traded product e.g. processing meat, caring for the incubation process, grading etc, 5:Cleaning equipment and premises, 6:Communicating with suppliers, 7:Business group meetings (SACCO or ROSCA meetings, etc), 8:Business or self-employment activities (other than the agri-enterprise) for self or household member, 9:Work as employed, 10:Going to the bank, 11:Bookkeeping, 18:Sleeping and resting, 13:Eating and drinking, 14:Personal care, 15:School (incl. homework), 16:Cooking, 17:Domestic work (incl. fetching water, fuel), 12:Caring for children, 19:Caring for adults (sick, elderly), 20:Commuting (to/from work or school), 21:Traveling (not for work or school), 22:Exercising, 23:Social activities and hobbies, 24:Religious activities, 25:Weaving / sewing / textile care, 26:Farming, crop cultivation,, 27:Livestock raising (cattle, poultry, sheep, etc.), 28:Shopping / getting service (incl. health services), 29:Horticulture

[213] [endtime\\_40\\_s: Until what time? \*\*\(hrs\\_40\\_s hours min\\_40\\_s minutes\)\*\*](#)

Categories: 1:00:00, 2:00:15, 3:00:30, 4:00:45, 5:01:00, 6:01:15, 7:01:30, 8:01:45, 9:02:00, 10:02:15, 11:02:30, 12:02:45, 13:03:00, 14:03:15, 15:03:30, 16:03:45, 17:04:00, 18:04:15, 19:04:30, 20:04:45, 21:05:00, 22:05:15, 23:05:30, 24:05:45, 25:06:00, 26:06:15, 27:06:30, 28:06:45, 29:07:00, 30:07:15, 31:07:30, 32:07:45, 33:08:00, 34:08:15, 35:08:30, 36:08:45, 37:09:00, 38:09:15, 39:09:30, 40:09:45, 41:10:00, 42:10:15, 43:10:30, 44:10:45, 45:11:00, 46:11:15, 47:11:30, 48:11:45, 49:12:00, 50:12:15, 51:12:30, 52:12:45, 53:13:00, 54:13:15, 55:13:30, 56:13:45, 57:14:00, 58:14:15, 59:14:30, 60:14:45, 61:15:00, 62:15:15, 63:15:30, 64:15:45, 65:16:00, 66:16:15, 67:16:30, 68:16:45, 69:17:00, 70:17:15, 71:17:30, 72:17:45, 73:18:00, 74:18:15, 75:18:30, 76:18:45, 77:19:00, 78:19:15, 79:19:30, 80:19:45, 81:20:00, 82:20:15, 83:20:30, 84:20:45, 85:21:00, 86:21:15, 87:21:30, 88:21:45, 89:22:00, 90:22:15, 91:22:30, 92:22:45, 93:23:00, 94:23:15, 95:23:30, 96:23:45

[214] [activity\\_41\\_s: From \*\*activity\\_40\\_s\*\*, what did you do?](#)

Categories: 1:Selling products and/or services in a shop, for self or household member, 2:Selling products and/or services door-to-door, for self or household member, 3:Sourcing and transporting products for trade e.g. day-old chicks, semen straws, feed, drugs etc, 4:Value -addition to the traded product e.g. processing meat, caring for the incubation process, grading etc, 5:Cleaning equipment and premises, 6:Communicating with suppliers, 7:Business group meetings (SACCO or ROSCA meetings, etc), 8:Business or self-employment activities (other than the agri-enterprise) for self or household member, 9:Work as employed, 10:Going to the bank, 11:Bookkeeping, 18:Sleeping and resting, 13:Eating and drinking, 14:Personal care, 15:School (incl. homework), 16:Cooking, 17:Domestic work (incl. fetching water, fuel), 12:Caring for children, 19:Caring for adults (sick, elderly), 20:Commuting (to/from work or school), 21:Traveling (not for work or school), 22:Exercising, 23:Social activities and hobbies, 24:Religious activities, 25:Weaving / sewing / textile care, 26:Farming, crop cultivation,, 27:Livestock raising (cattle, poultry, sheep, etc.), 28:Shopping / getting service (incl. health services), 29:Horticulture

[215] [endtime\\_41\\_s: Until what time? \*\*\(hrs\\_41\\_s hours min\\_41\\_s minutes\)\*\*](#)

Categories: 1:00:00, 2:00:15, 3:00:30, 4:00:45, 5:01:00, 6:01:15, 7:01:30, 8:01:45, 9:02:00, 10:02:15, 11:02:30, 12:02:45, 13:03:00, 14:03:15, 15:03:30, 16:03:45, 17:04:00, 18:04:15, 19:04:30, 20:04:45, 21:05:00, 22:05:15, 23:05:30, 24:05:45, 25:06:00, 26:06:15, 27:06:30, 28:06:45, 29:07:00, 30:07:15, 31:07:30, 32:07:45, 33:08:00, 34:08:15, 35:08:30, 36:08:45, 37:09:00, 38:09:15, 39:09:30, 40:09:45, 41:10:00, 42:10:15, 43:10:30, 44:10:45, 45:11:00, 46:11:15, 47:11:30, 48:11:45, 49:12:00, 50:12:15, 51:12:30, 52:12:45, 53:13:00, 54:13:15, 55:13:30, 56:13:45, 57:14:00, 58:14:15, 59:14:30, 60:14:45, 61:15:00, 62:15:15, 63:15:30, 64:15:45, 65:16:00, 66:16:15, 67:16:30, 68:16:45, 69:17:00, 70:17:15, 71:17:30, 72:17:45, 73:18:00, 74:18:15, 75:18:30, 76:18:45, 77:19:00, 78:19:15, 79:19:30, 80:19:45, 81:20:00, 82:20:15, 83:20:30, 84:20:45, 85:21:00, 86:21:15, 87:21:30, 88:21:45, 89:22:00, 90:22:15, 91:22:30, 92:22:45, 93:23:00, 94:23:15, 95:23:30, 96:23:45

[216] [activity\\_42\\_s: From \*\*activity\\_41\\_s\*\*, what did you do?](#)

Categories: 1:Selling products and/or services in a shop, for self or household member, 2:Selling products and/or services door-to-door, for self or household member, 3:Sourcing and transporting products for trade e.g. day-old chicks, semen straws, feed, drugs etc, 4:Value -addition to the traded product e.g. processing meat, caring for the incubation process, grading etc, 5:Cleaning equipment and premises, 6:Communicating with suppliers, 7:Business group meetings (SACCO or ROSCA meetings, etc), 8:Business or self-employment activities (other than the agri-enterprise) for self or household member, 9:Work as employed, 10:Going to the bank, 11:Bookkeeping, 18:Sleeping and resting, 13:Eating and drinking, 14:Personal care, 15:School (incl. homework), 16:Cooking, 17:Domestic work (incl. fetching water, fuel), 12:Caring for children, 19:Caring for adults (sick, elderly), 20:Commuting (to/from work or school), 21:Traveling (not for work or school), 22:Exercising, 23:Social activities and hobbies, 24:Religious activities, 25:Weaving / sewing / textile care, 26:Farming, crop cultivation,, 27:Livestock raising (cattle, poultry, sheep, etc.), 28:Shopping / getting service (incl. health services), 29:Horticulture

[217] [endtime\\_42\\_s: Until what time? \*\*\(hrs\\_42\\_s hours min\\_42\\_s minutes\)\*\*](#)

Categories: 1:00:00, 2:00:15, 3:00:30, 4:00:45, 5:01:00, 6:01:15, 7:01:30, 8:01:45, 9:02:00, 10:02:15, 11:02:30, 12:02:45, 13:03:00, 14:03:15, 15:03:30, 16:03:45, 17:04:00, 18:04:15, 19:04:30, 20:04:45, 21:05:00, 22:05:15, 23:05:30, 24:05:45, 25:06:00, 26:06:15, 27:06:30, 28:06:45, 29:07:00, 30:07:15, 31:07:30, 32:07:45, 33:08:00, 34:08:15, 35:08:30, 36:08:45, 37:09:00, 38:09:15, 39:09:30, 40:09:45, 41:10:00, 42:10:15, 43:10:30, 44:10:45, 45:11:00, 46:11:15, 47:11:30, 48:11:45, 49:12:00, 50:12:15, 51:12:30, 52:12:45, 53:13:00, 54:13:15, 55:13:30, 56:13:45, 57:14:00, 58:14:15, 59:14:30, 60:14:45, 61:15:00, 62:15:15, 63:15:30, 64:15:45, 65:16:00, 66:16:15, 67:16:30, 68:16:45, 69:17:00, 70:17:15, 71:17:30, 72:17:45, 73:18:00, 74:18:15, 75:18:30, 76:18:45, 77:19:00, 78:19:15, 79:19:30, 80:19:45, 81:20:00, 82:20:15, 83:20:30, 84:20:45, 85:21:00, 86:21:15, 87:21:30, 88:21:45, 89:22:00, 90:22:15, 91:22:30, 92:22:45, 93:23:00, 94:23:15, 95:23:30, 96:23:45

[218] [activity\\_43\\_s: From \*\*activity\\_42\\_s\*\*, what did you do?](#)

Categories: 1:Selling products and/or services in a shop, for self or household member, 2:Selling products and/or services door-to-door, for self or household member, 3:Sourcing and transporting products for trade e.g. day-old chicks, semen straws, feed, drugs etc, 4:Value -addition to the traded product e.g. processing meat, caring for the incubation process, grading etc, 5:Cleaning equipment and premises, 6:Communicating with suppliers, 7:Business group meetings (SACCO or ROSCA meetings, etc), 8:Business or self-employment activities (other than the agri-enterprise) for self or household member, 9:Work as employed, 10:Going to the bank, 11:Bookkeeping, 18:Sleeping and resting, 13:Eating and drinking, 14:Personal care, 15:School (incl. homework), 16:Cooking, 17:Domestic work (incl. fetching water, fuel), 12:Caring for children, 19:Caring for adults (sick, elderly), 20:Commuting (to/from work or school), 21:Traveling (not for work or school), 22:Exercising, 23:Social activities and hobbies, 24:Religious activities, 25:Weaving / sewing / textile care, 26:Farming, crop cultivation,, 27:Livestock raising (cattle, poultry, sheep, etc.), 28:Shopping / getting service (incl. health services), 29:Horticulture

[219] [endtime\\_43\\_s: Until what time? \*\*\(hrs\\_43\\_s hours min\\_43\\_s minutes\)\*\*](#)

Categories: 1:00:00, 2:00:15, 3:00:30, 4:00:45, 5:01:00, 6:01:15, 7:01:30, 8:01:45, 9:02:00, 10:02:15, 11:02:30, 12:02:45, 13:03:00, 14:03:15, 15:03:30, 16:03:45, 17:04:00, 18:04:15, 19:04:30, 20:04:45, 21:05:00, 22:05:15, 23:05:30, 24:05:45, 25:06:00, 26:06:15, 27:06:30, 28:06:45, 29:07:00, 30:07:15, 31:07:30, 32:07:45, 33:08:00, 34:08:15, 35:08:30, 36:08:45, 37:09:00, 38:09:15, 39:09:30, 40:09:45, 41:10:00, 42:10:15, 43:10:30, 44:10:45, 45:11:00, 46:11:15, 47:11:30, 48:11:45, 49:12:00, 50:12:15, 51:12:30, 52:12:45, 53:13:00, 54:13:15, 55:13:30, 56:13:45, 57:14:00, 58:14:15, 59:14:30, 60:14:45, 61:15:00, 62:15:15, 63:15:30, 64:15:45, 65:16:00, 66:16:15, 67:16:30, 68:16:45, 69:17:00, 70:17:15, 71:17:30, 72:17:45, 73:18:00, 74:18:15, 75:18:30, 76:18:45, 77:19:00, 78:19:15, 79:19:30, 80:19:45, 81:20:00, 82:20:15, 83:20:30, 84:20:45, 85:21:00, 86:21:15, 87:21:30, 88:21:45, 89:22:00, 90:22:15, 91:22:30, 92:22:45, 93:23:00, 94:23:15, 95:23:30, 96:23:45

[220] [activity\\_44\\_s: From \*\*activity\\_43\\_s\*\*, what did you do?](#)

Categories: 1:Selling products and/or services in a shop, for self or household member, 2:Selling products and/or services door-to-door, for self or household member, 3:Sourcing and transporting products for trade e.g. day-old chicks, semen straws, feed, drugs etc, 4:Value -addition to the traded product e.g. processing meat, caring for the incubation process, grading etc, 5:Cleaning equipment and premises, 6:Communicating with suppliers, 7:Business group meetings (SACCO or ROSCA meetings, etc), 8:Business or self-employment activities (other than the agri-enterprise) for self or household member, 9:Work as employed, 10:Going to the bank, 11:Bookkeeping, 18:Sleeping and resting, 13:Eating and drinking, 14:Personal care, 15:School (incl. homework), 16:Cooking, 17:Domestic work (incl. fetching water, fuel), 12:Caring for children, 19:Caring for adults (sick, elderly), 20:Commuting (to/from work or school), 21:Traveling (not for work or school), 22:Exercising, 23:Social activities and hobbies, 24:Religious activities, 25:Weaving / sewing / textile care, 26:Farming, crop cultivation,, 27:Livestock raising (cattle, poultry, sheep, etc.), 28:Shopping / getting service (incl. health services), 29:Horticulture

[221] [endtime\\_44\\_s: Until what time? \*\*\(hrs\\_44\\_s hours min\\_44\\_s minutes\)\*\*](#)

Categories: 1:00:00, 2:00:15, 3:00:30, 4:00:45, 5:01:00, 6:01:15, 7:01:30, 8:01:45, 9:02:00, 10:02:15, 11:02:30, 12:02:45, 13:03:00, 14:03:15, 15:03:30, 16:03:45, 17:04:00, 18:04:15, 19:04:30, 20:04:45, 21:05:00, 22:05:15, 23:05:30, 24:05:45, 25:06:00, 26:06:15, 27:06:30, 28:06:45, 29:07:00, 30:07:15, 31:07:30, 32:07:45, 33:08:00, 34:08:15, 35:08:30, 36:08:45, 37:09:00, 38:09:15, 39:09:30, 40:09:45, 41:10:00, 42:10:15, 43:10:30, 44:10:45, 45:11:00, 46:11:15, 47:11:30, 48:11:45, 49:12:00, 50:12:15, 51:12:30, 52:12:45, 53:13:00, 54:13:15, 55:13:30, 56:13:45, 57:14:00, 58:14:15, 59:14:30, 60:14:45, 61:15:00, 62:15:15, 63:15:30, 64:15:45, 65:16:00, 66:16:15, 67:16:30, 68:16:45, 69:17:00, 70:17:15, 71:17:30, 72:17:45, 73:18:00, 74:18:15, 75:18:30, 76:18:45, 77:19:00, 78:19:15, 79:19:30, 80:19:45, 81:20:00, 82:20:15, 83:20:30, 84:20:45, 85:21:00, 86:21:15, 87:21:30, 88:21:45, 89:22:00, 90:22:15, 91:22:30, 92:22:45, 93:23:00, 94:23:15, 95:23:30, 96:23:45

[222] [activity\\_45\\_s: From \*\*activity\\_44\\_s\*\*, what did you do?](#)

Categories: 1:Selling products and/or services in a shop, for self or household member, 2:Selling products and/or services door-to-door, for self or household member, 3:Sourcing and transporting products for trade e.g. day-old chicks, semen straws, feed, drugs etc, 4:Value -addition to the traded product e.g. processing meat, caring for the incubation process, grading etc, 5:Cleaning equipment and premises, 6:Communicating with suppliers, 7:Business group meetings (SACCO or ROSCA meetings, etc), 8:Business or self-employment activities (other than the agri-enterprise) for self or household member, 9:Work as employed, 10:Going to the bank, 11:Bookkeeping, 18:Sleeping and resting, 13:Eating and drinking, 14:Personal care, 15:School (incl. homework), 16:Cooking, 17:Domestic work (incl. fetching water, fuel), 12:Caring for children, 19:Caring for adults (sick, elderly), 20:Commuting (to/from work or school), 21:Traveling (not for work or school), 22:Exercising, 23:Social activities and hobbies, 24:Religious activities, 25:Weaving / sewing / textile care, 26:Farming, crop cultivation,, 27:Livestock raising (cattle, poultry, sheep, etc.), 28:Shopping / getting service (incl. health services), 29:Horticulture

[223] [endtime\\_45\\_s: Until what time? \*\*\(hrs\\_45\\_s hours min\\_45\\_s minutes\)\*\*](#)

Categories: 1:00:00, 2:00:15, 3:00:30, 4:00:45, 5:01:00, 6:01:15, 7:01:30, 8:01:45, 9:02:00, 10:02:15, 11:02:30, 12:02:45, 13:03:00, 14:03:15, 15:03:30, 16:03:45, 17:04:00, 18:04:15, 19:04:30, 20:04:45, 21:05:00, 22:05:15, 23:05:30, 24:05:45, 25:06:00, 26:06:15, 27:06:30, 28:06:45, 29:07:00, 30:07:15, 31:07:30, 32:07:45, 33:08:00, 34:08:15, 35:08:30, 36:08:45, 37:09:00, 38:09:15, 39:09:30, 40:09:45, 41:10:00, 42:10:15, 43:10:30, 44:10:45, 45:11:00, 46:11:15, 47:11:30, 48:11:45, 49:12:00, 50:12:15, 51:12:30, 52:12:45, 53:13:00, 54:13:15, 55:13:30, 56:13:45, 57:14:00, 58:14:15, 59:14:30, 60:14:45, 61:15:00, 62:15:15, 63:15:30, 64:15:45, 65:16:00, 66:16:15, 67:16:30, 68:16:45, 69:17:00, 70:17:15, 71:17:30, 72:17:45, 73:18:00, 74:18:15, 75:18:30, 76:18:45, 77:19:00, 78:19:15, 79:19:30, 80:19:45, 81:20:00, 82:20:15, 83:20:30, 84:20:45, 85:21:00, 86:21:15, 87:21:30, 88:21:45, 89:22:00, 90:22:15, 91:22:30, 92:22:45, 93:23:00, 94:23:15, 95:23:30, 96:23:45

[224] [activity\\_46\\_s: From \*\*activity\\_45\\_s\*\*, what did you do?](#)

Categories: 1:Selling products and/or services in a shop, for self or household member, 2:Selling products and/or services door-to-door, for self or household member, 3:Sourcing and transporting products for trade e.g. day-old chicks, semen straws, feed, drugs etc, 4:Value -addition to the traded product e.g. processing meat, caring for the incubation process, grading etc, 5:Cleaning equipment and premises, 6:Communicating with suppliers, 7:Business group meetings (SACCO or ROSCA meetings, etc), 8:Business or self-employment activities (other than the agri-enterprise) for self or household member, 9:Work as employed, 10:Going to the bank, 11:Bookkeeping, 18:Sleeping and resting, 13:Eating and drinking, 14:Personal care, 15:School (incl. homework), 16:Cooking, 17:Domestic work (incl. fetching water, fuel), 12:Caring for children, 19:Caring for adults (sick, elderly), 20:Commuting (to/from work or school), 21:Traveling (not for work or school), 22:Exercising, 23:Social activities and hobbies, 24:Religious activities, 25:Weaving / sewing / textile care, 26:Farming, crop cultivation,, 27:Livestock raising (cattle, poultry, sheep, etc.), 28:Shopping / getting service (incl. health services), 29:Horticulture

[225] [endtime\\_46\\_s: Until what time? \*\*\(%hrs\\_46\\_s% hours %min\\_46\\_s% minutes\)\*\*](#)

Categories: 1:00:00, 2:00:15, 3:00:30, 4:00:45, 5:01:00, 6:01:15, 7:01:30, 8:01:45, 9:02:00, 10:02:15, 11:02:30, 12:02:45, 13:03:00, 14:03:15, 15:03:30, 16:03:45, 17:04:00, 18:04:15, 19:04:30, 20:04:45, 21:05:00, 22:05:15, 23:05:30, 24:05:45, 25:06:00, 26:06:15, 27:06:30, 28:06:45, 29:07:00, 30:07:15, 31:07:30, 32:07:45, 33:08:00, 34:08:15, 35:08:30, 36:08:45, 37:09:00, 38:09:15, 39:09:30, 40:09:45, 41:10:00, 42:10:15, 43:10:30, 44:10:45, 45:11:00, 46:11:15, 47:11:30, 48:11:45, 49:12:00, 50:12:15, 51:12:30, 52:12:45, 53:13:00, 54:13:15, 55:13:30, 56:13:45, 57:14:00, 58:14:15, 59:14:30, 60:14:45, 61:15:00, 62:15:15, 63:15:30, 64:15:45, 65:16:00, 66:16:15, 67:16:30, 68:16:45, 69:17:00, 70:17:15, 71:17:30, 72:17:45, 73:18:00, 74:18:15, 75:18:30, 76:18:45, 77:19:00, 78:19:15, 79:19:30, 80:19:45, 81:20:00, 82:20:15, 83:20:30, 84:20:45, 85:21:00, 86:21:15, 87:21:30, 88:21:45, 89:22:00, 90:22:15, 91:22:30, 92:22:45, 93:23:00, 94:23:15, 95:23:30, 96:23:45

[226] [activity\\_47\\_s: From \*\*activity\\_46\\_s\*\*, what did you do?](#)

Categories: 1:Selling products and/or services in a shop, for self or household member, 2:Selling products and/or services door-to-door, for self or household member, 3:Sourcing and transporting products for trade e.g. day-old chicks, semen straws, feed, drugs etc, 4:Value -addition to the traded product e.g. processing meat, caring for the incubation process, grading etc, 5:Cleaning equipment and premises, 6:Communicating with suppliers, 7:Business group meetings (SACCO or ROSCA meetings, etc), 8:Business or self-employment activities (other than the agri-enterprise) for self or household member, 9:Work as employed, 10:Going to the bank, 11:Bookkeeping, 18:Sleeping and resting, 13:Eating and drinking, 14:Personal care, 15:School (incl. homework), 16:Cooking, 17:Domestic work (incl. fetching water, fuel), 12:Caring for children, 19:Caring for adults (sick, elderly), 20:Commuting (to/from work or school), 21:Traveling (not for work or school), 22:Exercising, 23:Social activities and hobbies, 24:Religious activities, 25:Weaving / sewing / textile care, 26:Farming, crop cultivation,, 27:Livestock raising (cattle, poultry, sheep, etc.), 28:Shopping / getting service (incl. health services), 29:Horticulture

[227] [endtime\\_47\\_s: Until what time? \*\*\(%hrs\\_47\\_s% hours %min\\_47\\_s% minutes\)\*\*](#)

Categories: 1:00:00, 2:00:15, 3:00:30, 4:00:45, 5:01:00, 6:01:15, 7:01:30, 8:01:45, 9:02:00, 10:02:15, 11:02:30, 12:02:45, 13:03:00, 14:03:15, 15:03:30, 16:03:45, 17:04:00, 18:04:15, 19:04:30, 20:04:45, 21:05:00, 22:05:15, 23:05:30, 24:05:45, 25:06:00, 26:06:15, 27:06:30, 28:06:45, 29:07:00, 30:07:15, 31:07:30, 32:07:45, 33:08:00, 34:08:15, 35:08:30, 36:08:45, 37:09:00, 38:09:15, 39:09:30, 40:09:45, 41:10:00, 42:10:15, 43:10:30, 44:10:45, 45:11:00, 46:11:15, 47:11:30, 48:11:45, 49:12:00, 50:12:15, 51:12:30, 52:12:45, 53:13:00, 54:13:15, 55:13:30, 56:13:45, 57:14:00, 58:14:15, 59:14:30, 60:14:45, 61:15:00, 62:15:15, 63:15:30, 64:15:45, 65:16:00, 66:16:15, 67:16:30, 68:16:45, 69:17:00, 70:17:15, 71:17:30, 72:17:45, 73:18:00, 74:18:15, 75:18:30, 76:18:45, 77:19:00, 78:19:15, 79:19:30, 80:19:45, 81:20:00, 82:20:15, 83:20:30, 84:20:45, 85:21:00, 86:21:15, 87:21:30, 88:21:45, 89:22:00, 90:22:15, 91:22:30, 92:22:45, 93:23:00, 94:23:15, 95:23:30, 96:23:45

[228] [activity\\_48\\_s: From \*\*activity\\_47\\_s\*\*, what did you do?](#)

Categories: 1:Selling products and/or services in a shop, for self or household member, 2:Selling products and/or services door-to-door, for self or household member, 3:Sourcing and transporting products for trade e.g. day-old chicks, semen straws, feed, drugs etc, 4:Value -addition to the traded product e.g. processing meat, caring for the incubation process, grading etc, 5:Cleaning equipment and premises, 6:Communicating with suppliers, 7:Business group meetings (SACCO or ROSCA meetings, etc), 8:Business or self-employment activities (other than the agri-enterprise) for self or household member, 9:Work as employed, 10:Going to the bank, 11:Bookkeeping, 18:Sleeping and resting, 13:Eating and drinking, 14:Personal care, 15:School (incl. homework), 16:Cooking, 17:Domestic work (incl. fetching water, fuel), 12:Caring for children, 19:Caring for adults (sick, elderly), 20:Commuting (to/from work or school), 21:Traveling (not for work or school), 22:Exercising, 23:Social activities and hobbies, 24:Religious activities, 25:Weaving / sewing / textile care, 26:Farming, crop cultivation,, 27:Livestock raising (cattle, poultry, sheep, etc.), 28:Shopping / getting service (incl. health services), 29:Horticulture

[229] [endtime\\_48\\_s: Until what time? \*\*\(%hrs\\_48\\_s% hours %min\\_48\\_s% minutes\)\*\*](#)

Categories: 1:00:00, 2:00:15, 3:00:30, 4:00:45, 5:01:00, 6:01:15, 7:01:30, 8:01:45, 9:02:00, 10:02:15, 11:02:30, 12:02:45, 13:03:00, 14:03:15, 15:03:30, 16:03:45, 17:04:00, 18:04:15, 19:04:30, 20:04:45, 21:05:00, 22:05:15, 23:05:30, 24:05:45, 25:06:00, 26:06:15, 27:06:30, 28:06:45, 29:07:00, 30:07:15, 31:07:30, 32:07:45, 33:08:00, 34:08:15, 35:08:30, 36:08:45, 37:09:00, 38:09:15, 39:09:30, 40:09:45, 41:10:00, 42:10:15, 43:10:30, 44:10:45, 45:11:00, 46:11:15, 47:11:30, 48:11:45, 49:12:00, 50:12:15, 51:12:30, 52:12:45, 53:13:00, 54:13:15, 55:13:30, 56:13:45, 57:14:00, 58:14:15, 59:14:30, 60:14:45, 61:15:00, 62:15:15, 63:15:30, 64:15:45, 65:16:00, 66:16:15, 67:16:30, 68:16:45, 69:17:00, 70:17:15, 71:17:30, 72:17:45, 73:18:00, 74:18:15, 75:18:30, 76:18:45, 77:19:00, 78:19:15, 79:19:30, 80:19:45, 81:20:00, 82:20:15, 83:20:30, 84:20:45, 85:21:00, 86:21:15, 87:21:30, 88:21:45, 89:22:00, 90:22:15, 91:22:30, 92:22:45, 93:23:00, 94:23:15, 95:23:30, 96:23:45

[230] [activity\\_49\\_s: From \*\*activity\\_48\\_s\*\*, what did you do?](#)

Categories: 1:Selling products and/or services in a shop, for self or household member, 2:Selling products and/or services door-to-door, for self or household member, 3:Sourcing and transporting products for trade e.g. day-old chicks, semen straws, feed, drugs etc, 4:Value -addition to the traded product e.g. processing meat, caring for the incubation process, grading etc, 5:Cleaning equipment and premises, 6:Communicating with suppliers, 7:Business group meetings (SACCO or ROSCA meetings, etc), 8:Business or self-employment activities (other than the agri-enterprise) for self or household member, 9:Work as employed, 10:Going to the bank, 11:Bookkeeping, 18:Sleeping and resting, 13:Eating and drinking, 14:Personal care, 15:School (incl. homework), 16:Cooking, 17:Domestic work (incl. fetching water, fuel), 12:Caring for children, 19:Caring for adults (sick, elderly), 20:Commuting (to/from work or school), 21:Traveling (not for work or school), 22:Exercising, 23:Social activities and hobbies, 24:Religious activities, 25:Weaving / sewing / textile care, 26:Farming, crop cultivation,, 27:Livestock raising (cattle, poultry, sheep, etc.), 28:Shopping / getting service (incl. health services), 29:Horticulture

[231] [endtime\\_49\\_s: Until what time? \*\*\(%hrs\\_49\\_s% hours %min\\_49\\_s% minutes\)\*\*](#)

Categories: 1:00:00, 2:00:15, 3:00:30, 4:00:45, 5:01:00, 6:01:15, 7:01:30, 8:01:45, 9:02:00, 10:02:15, 11:02:30, 12:02:45, 13:03:00, 14:03:15, 15:03:30, 16:03:45, 17:04:00, 18:04:15, 19:04:30, 20:04:45, 21:05:00, 22:05:15, 23:05:30, 24:05:45, 25:06:00, 26:06:15, 27:06:30, 28:06:45, 29:07:00, 30:07:15, 31:07:30, 32:07:45, 33:08:00, 34:08:15, 35:08:30, 36:08:45, 37:09:00, 38:09:15, 39:09:30, 40:09:45, 41:10:00, 42:10:15, 43:10:30, 44:10:45, 45:11:00, 46:11:15, 47:11:30, 48:11:45, 49:12:00, 50:12:15, 51:12:30, 52:12:45, 53:13:00, 54:13:15, 55:13:30, 56:13:45, 57:14:00, 58:14:15, 59:14:30, 60:14:45, 61:15:00, 62:15:15, 63:15:30, 64:15:45, 65:16:00, 66:16:15, 67:16:30, 68:16:45, 69:17:00, 70:17:15, 71:17:30, 72:17:45, 73:18:00, 74:18:15, 75:18:30, 76:18:45, 77:19:00, 78:19:15, 79:19:30, 80:19:45, 81:20:00, 82:20:15, 83:20:30, 84:20:45, 85:21:00, 86:21:15, 87:21:30, 88:21:45, 89:22:00, 90:22:15, 91:22:30, 92:22:45, 93:23:00, 94:23:15, 95:23:30, 96:23:45

[232] [activity\\_50\\_s: From \*\*activity\\_49\\_s\*\*, what did you do?](#)

Categories: 1:Selling products and/or services in a shop, for self or household member, 2:Selling products and/or services door-to-door, for self or household member, 3:Sourcing and transporting products for trade e.g. day-old chicks, semen straws, feed, drugs etc, 4:Value -addition to the traded product e.g. processing meat, caring for the incubation process, grading etc, 5:Cleaning equipment and premises, 6:Communicating with suppliers, 7:Business group meetings (SACCO or ROSCA meetings, etc), 8:Business or self-employment activities (other than the agri-enterprise) for self or household member, 9:Work as employed, 10:Going to the bank, 11:Bookkeeping, 18:Sleeping and resting, 13:Eating and drinking, 14:Personal care, 15:School (incl. homework), 16:Cooking, 17:Domestic work (incl. fetching water, fuel), 12:Caring for children, 19:Caring for adults (sick, elderly), 20:Commuting (to/from work or school), 21:Traveling (not for work or school), 22:Exercising, 23:Social activities and hobbies, 24:Religious activities, 25:Weaving / sewing / textile care, 26:Farming, crop cultivation,, 27:Livestock raising (cattle, poultry, sheep, etc.), 28:Shopping / getting service (incl. health services), 29:Horticulture

[233] [endtime\\_50\\_s: Until what time? \*\*\(%hrs\\_50\\_s% hours %min\\_50\\_s% minutes\)\*\*](#)

Categories: 1:00:00, 2:00:15, 3:00:30, 4:00:45, 5:01:00, 6:01:15, 7:01:30, 8:01:45, 9:02:00, 10:02:15, 11:02:30, 12:02:45, 13:03:00, 14:03:15, 15:03:30, 16:03:45, 17:04:00, 18:04:15, 19:04:30, 20:04:45, 21:05:00, 22:05:15, 23:05:30, 24:05:45, 25:06:00, 26:06:15, 27:06:30, 28:06:45, 29:07:00, 30:07:15, 31:07:30, 32:07:45, 33:08:00, 34:08:15, 35:08:30, 36:08:45, 37:09:00, 38:09:15, 39:09:30, 40:09:45, 41:10:00, 42:10:15, 43:10:30, 44:10:45, 45:11:00, 46:11:15, 47:11:30, 48:11:45, 49:12:00, 50:12:15, 51:12:30, 52:12:45, 53:13:00, 54:13:15, 55:13:30, 56:13:45, 57:14:00, 58:14:15, 59:14:30, 60:14:45, 61:15:00, 62:15:15, 63:15:30, 64:15:45, 65:16:00, 66:16:15, 67:16:30, 68:16:45, 69:17:00, 70:17:15, 71:17:30, 72:17:45, 73:18:00, 74:18:15, 75:18:30, 76:18:45, 77:19:00, 78:19:15, 79:19:30, 80:19:45, 81:20:00, 82:20:15, 83:20:30, 84:20:45, 85:21:00, 86:21:15, 87:21:30, 88:21:45, 89:22:00, 90:22:15, 91:22:30, 92:22:45, 93:23:00, 94:23:15, 95:23:30, 96:23:45

[234] [activity\\_51\\_s: From \*\*activity\\_50\\_s\*\*, what did you do?](#)

Categories: 1:Selling products and/or services in a shop, for self or household member, 2:Selling products and/or services door-to-door, for self or household member, 3:Sourcing and transporting products for trade e.g. day-old chicks, semen straws, feed, drugs etc, 4:Value -addition to the traded product e.g. processing meat, caring for the incubation process, grading etc, 5:Cleaning equipment and premises, 6:Communicating with suppliers, 7:Business group meetings (SACCO or ROSCA meetings, etc), 8:Business or self-employment activities (other than the agri-enterprise) for self or household member, 9:Work as employed, 10:Going to the bank, 11:Bookkeeping, 18:Sleeping and resting, 13:Eating and drinking, 14:Personal care, 15:School (incl. homework), 16:Cooking, 17:Domestic work (incl. fetching water, fuel), 12:Caring for children, 19:Caring for adults (sick, elderly), 20:Commuting (to/from work or school), 21:Traveling (not for work or school), 22:Exercising, 23:Social activities and hobbies, 24:Religious activities, 25:Weaving / sewing / textile care, 26:Farming, crop cultivation,, 27:Livestock raising (cattle, poultry, sheep, etc.), 28:Shopping / getting service (incl. health services), 29:Horticulture

[235] [endtime\\_51\\_s: Until what time? \*\*\(%hrs\\_51\\_s% hours %min\\_51\\_s% minutes\)\*\*](#)

Categories: 1:00:00, 2:00:15, 3:00:30, 4:00:45, 5:01:00, 6:01:15, 7:01:30, 8:01:45, 9:02:00, 10:02:15, 11:02:30, 12:02:45, 13:03:00, 14:03:15, 15:03:30, 16:03:45, 17:04:00, 18:04:15, 19:04:30, 20:04:45, 21:05:00, 22:05:15, 23:05:30, 24:05:45, 25:06:00, 26:06:15, 27:06:30, 28:06:45, 29:07:00, 30:07:15, 31:07:30, 32:07:45, 33:08:00, 34:08:15, 35:08:30, 36:08:45, 37:09:00, 38:09:15, 39:09:30, 40:09:45, 41:10:00, 42:10:15, 43:10:30, 44:10:45, 45:11:00, 46:11:15, 47:11:30, 48:11:45, 49:12:00, 50:12:15, 51:12:30, 52:12:45, 53:13:00, 54:13:15, 55:13:30, 56:13:45, 57:14:00, 58:14:15, 59:14:30, 60:14:45, 61:15:00, 62:15:15, 63:15:30, 64:15:45, 65:16:00, 66:16:15, 67:16:30, 68:16:45, 69:17:00, 70:17:15, 71:17:30, 72:17:45, 73:18:00, 74:18:15, 75:18:30, 76:18:45, 77:19:00, 78:19:15, 79:19:30, 80:19:45, 81:20:00, 82:20:15, 83:20:30, 84:20:45, 85:21:00, 86:21:15, 87:21:30, 88:21:45, 89:22:00, 90:22:15, 91:22:30, 92:22:45, 93:23:00, 94:23:15, 95:23:30, 96:23:45

[236] [activity\\_52\\_s: From \*\*activity\\_51\\_s\*\*, what did you do?](#)

Categories: 1:Selling products and/or services in a shop, for self or household member, 2:Selling products and/or services door-to-door, for self or household member, 3:Sourcing and transporting products for trade e.g. day-old chicks, semen straws, feed, drugs etc, 4:Value -addition to the traded product e.g. processing meat, caring for the incubation process, grading etc, 5:Cleaning equipment and premises, 6:Communicating with suppliers, 7:Business group meetings (SACCO or ROSCA meetings, etc), 8:Business or self-employment activities (other than the agri-enterprise) for self or household member, 9:Work as employed, 10:Going to the bank, 11:Bookkeeping, 18:Sleeping and resting, 13:Eating and drinking, 14:Personal care, 15:School (incl. homework), 16:Cooking, 17:Domestic work (incl. fetching water, fuel), 12:Caring for children, 19:Caring for adults (sick, elderly), 20:Commuting (to/from work or school), 21:Traveling (not for work or school), 22:Exercising, 23:Social activities and hobbies, 24:Religious activities, 25:Weaving / sewing / textile care, 26:Farming, crop cultivation,, 27:Livestock raising (cattle, poultry, sheep, etc.), 28:Shopping / getting service (incl. health services), 29:Horticulture

[237] [endtime\\_52\\_s: Until what time? \(%hrs\\_52\\_s hours %min\\_52\\_s minutes\)](#)

Categories: 1:00:00, 2:00:15, 3:00:30, 4:00:45, 5:01:00, 6:01:15, 7:01:30, 8:01:45, 9:02:00, 10:02:15, 11:02:30, 12:02:45, 13:03:00, 14:03:15, 15:03:30, 16:03:45, 17:04:00, 18:04:15, 19:04:30, 20:04:45, 21:05:00, 22:05:15, 23:05:30, 24:05:45, 25:06:00, 26:06:15, 27:06:30, 28:06:45, 29:07:00, 30:07:15, 31:07:30, 32:07:45, 33:08:00, 34:08:15, 35:08:30, 36:08:45, 37:09:00, 38:09:15, 39:09:30, 40:09:45, 41:10:00, 42:10:15, 43:10:30, 44:10:45, 45:11:00, 46:11:15, 47:11:30, 48:11:45, 49:12:00, 50:12:15, 51:12:30, 52:12:45, 53:13:00, 54:13:15, 55:13:30, 56:13:45, 57:14:00, 58:14:15, 59:14:30, 60:14:45, 61:15:00, 62:15:15, 63:15:30, 64:15:45, 65:16:00, 66:16:15, 67:16:30, 68:16:45, 69:17:00, 70:17:15, 71:17:30, 72:17:45, 73:18:00, 74:18:15, 75:18:30, 76:18:45, 77:19:00, 78:19:15, 79:19:30, 80:19:45, 81:20:00, 82:20:15, 83:20:30, 84:20:45, 85:21:00, 86:21:15, 87:21:30, 88:21:45, 89:22:00, 90:22:15, 91:22:30, 92:22:45, 93:23:00, 94:23:15, 95:23:30, 96:23:45

[238] [activity\\_53\\_s: From \*\*activity\\_52\\_s\*\*, what did you do?](#)

Categories: 1:Selling products and/or services in a shop, for self or household member, 2:Selling products and/or services door-to-door, for self or household member, 3:Sourcing and transporting products for trade e.g. day-old chicks, semen straws, feed, drugs etc, 4:Value -addition to the traded product e.g. processing meat, caring for the incubation process, grading etc, 5:Cleaning equipment and premises, 6:Communicating with suppliers, 7:Business group meetings (SACCO or ROSCA meetings, etc), 8:Business or self-employment activities (other than the agri-enterprise) for self or household member, 9:Work as employed, 10:Going to the bank, 11:Bookkeeping, 18:Sleeping and resting, 13:Eating and drinking, 14:Personal care, 15:School (incl. homework), 16:Cooking, 17:Domestic work (incl. fetching water, fuel), 12:Caring for children, 19:Caring for adults (sick, elderly), 20:Commuting (to/from work or school), 21:Traveling (not for work or school), 22:Exercising, 23:Social activities and hobbies, 24:Religious activities, 25:Weaving / sewing / textile care, 26:Farming, crop cultivation,, 27:Livestock raising (cattle, poultry, sheep, etc.), 28:Shopping / getting service (incl. health services), 29:Horticulture

[239] [endtime\\_53\\_s: Until what time? \(%hrs\\_53\\_s hours %min\\_53\\_s minutes\)](#)

Categories: 1:00:00, 2:00:15, 3:00:30, 4:00:45, 5:01:00, 6:01:15, 7:01:30, 8:01:45, 9:02:00, 10:02:15, 11:02:30, 12:02:45, 13:03:00, 14:03:15, 15:03:30, 16:03:45, 17:04:00, 18:04:15, 19:04:30, 20:04:45, 21:05:00, 22:05:15, 23:05:30, 24:05:45, 25:06:00, 26:06:15, 27:06:30, 28:06:45, 29:07:00, 30:07:15, 31:07:30, 32:07:45, 33:08:00, 34:08:15, 35:08:30, 36:08:45, 37:09:00, 38:09:15, 39:09:30, 40:09:45, 41:10:00, 42:10:15, 43:10:30, 44:10:45, 45:11:00, 46:11:15, 47:11:30, 48:11:45, 49:12:00, 50:12:15, 51:12:30, 52:12:45, 53:13:00, 54:13:15, 55:13:30, 56:13:45, 57:14:00, 58:14:15, 59:14:30, 60:14:45, 61:15:00, 62:15:15, 63:15:30, 64:15:45, 65:16:00, 66:16:15, 67:16:30, 68:16:45, 69:17:00, 70:17:15, 71:17:30, 72:17:45, 73:18:00, 74:18:15, 75:18:30, 76:18:45, 77:19:00, 78:19:15, 79:19:30, 80:19:45, 81:20:00, 82:20:15, 83:20:30, 84:20:45, 85:21:00, 86:21:15, 87:21:30, 88:21:45, 89:22:00, 90:22:15, 91:22:30, 92:22:45, 93:23:00, 94:23:15, 95:23:30, 96:23:45

[240] [activity\\_54\\_s: From \*\*activity\\_53\\_s\*\*, what did you do?](#)

Categories: 1:Selling products and/or services in a shop, for self or household member, 2:Selling products and/or services door-to-door, for self or household member, 3:Sourcing and transporting products for trade e.g. day-old chicks, semen straws, feed, drugs etc, 4:Value -addition to the traded product e.g. processing meat, caring for the incubation process, grading etc, 5:Cleaning equipment and premises, 6:Communicating with suppliers, 7:Business group meetings (SACCO or ROSCA meetings, etc), 8:Business or self-employment activities (other than the agri-enterprise) for self or household member, 9:Work as employed, 10:Going to the bank, 11:Bookkeeping, 18:Sleeping and resting, 13:Eating and drinking, 14:Personal care, 15:School (incl. homework), 16:Cooking, 17:Domestic work (incl. fetching water, fuel), 12:Caring for children, 19:Caring for adults (sick, elderly), 20:Commuting (to/from work or school), 21:Traveling (not for work or school), 22:Exercising, 23:Social activities and hobbies, 24:Religious activities, 25:Weaving / sewing / textile care, 26:Farming, crop cultivation,, 27:Livestock raising (cattle, poultry, sheep, etc.), 28:Shopping / getting service (incl. health services), 29:Horticulture

[241] [endtime\\_54\\_s: Until what time? \(%hrs\\_54\\_s hours %min\\_54\\_s minutes\)](#)

Categories: 1:00:00, 2:00:15, 3:00:30, 4:00:45, 5:01:00, 6:01:15, 7:01:30, 8:01:45, 9:02:00, 10:02:15, 11:02:30, 12:02:45, 13:03:00, 14:03:15, 15:03:30, 16:03:45, 17:04:00, 18:04:15, 19:04:30, 20:04:45, 21:05:00, 22:05:15, 23:05:30, 24:05:45, 25:06:00, 26:06:15, 27:06:30, 28:06:45, 29:07:00, 30:07:15, 31:07:30, 32:07:45, 33:08:00, 34:08:15, 35:08:30, 36:08:45, 37:09:00, 38:09:15, 39:09:30, 40:09:45, 41:10:00, 42:10:15, 43:10:30, 44:10:45, 45:11:00, 46:11:15, 47:11:30, 48:11:45, 49:12:00, 50:12:15, 51:12:30, 52:12:45, 53:13:00, 54:13:15, 55:13:30, 56:13:45, 57:14:00, 58:14:15, 59:14:30, 60:14:45, 61:15:00, 62:15:15, 63:15:30, 64:15:45, 65:16:00, 66:16:15, 67:16:30, 68:16:45, 69:17:00, 70:17:15, 71:17:30, 72:17:45, 73:18:00, 74:18:15, 75:18:30, 76:18:45, 77:19:00, 78:19:15, 79:19:30, 80:19:45, 81:20:00, 82:20:15, 83:20:30, 84:20:45, 85:21:00, 86:21:15, 87:21:30, 88:21:45, 89:22:00, 90:22:15, 91:22:30, 92:22:45, 93:23:00, 94:23:15, 95:23:30, 96:23:45

[242] [activity\\_55\\_s: From \*\*activity\\_54\\_s\*\*, what did you do?](#)

Categories: 1:Selling products and/or services in a shop, for self or household member, 2:Selling products and/or services door-to-door, for self or household member, 3:Sourcing and transporting products for trade e.g. day-old chicks, semen straws, feed, drugs etc, 4:Value -addition to the traded product e.g. processing meat, caring for the incubation process, grading etc, 5:Cleaning equipment and premises, 6:Communicating with suppliers, 7:Business group meetings (SACCO or ROSCA meetings, etc), 8:Business or self-employment activities (other than the agri-enterprise) for self or household member, 9:Work as employed, 10:Going to the bank, 11:Bookkeeping, 18:Sleeping and resting, 13:Eating and drinking, 14:Personal care, 15:School (incl. homework), 16:Cooking, 17:Domestic work (incl. fetching water, fuel), 12:Caring for children, 19:Caring for adults (sick, elderly), 20:Commuting (to/from work or school), 21:Traveling (not for work or school), 22:Exercising, 23:Social activities and hobbies, 24:Religious activities, 25:Weaving / sewing / textile care, 26:Farming, crop cultivation,, 27:Livestock raising (cattle, poultry, sheep, etc.), 28:Shopping / getting service (incl. health services), 29:Horticulture

[243] [endtime\\_55\\_s: Until what time? \*\*\(%hrs\\_55\\_s% hours %min\\_55\\_s% minutes\)\*\*](#)

Categories: 1:00:00, 2:00:15, 3:00:30, 4:00:45, 5:01:00, 6:01:15, 7:01:30, 8:01:45, 9:02:00, 10:02:15, 11:02:30, 12:02:45, 13:03:00, 14:03:15, 15:03:30, 16:03:45, 17:04:00, 18:04:15, 19:04:30, 20:04:45, 21:05:00, 22:05:15, 23:05:30, 24:05:45, 25:06:00, 26:06:15, 27:06:30, 28:06:45, 29:07:00, 30:07:15, 31:07:30, 32:07:45, 33:08:00, 34:08:15, 35:08:30, 36:08:45, 37:09:00, 38:09:15, 39:09:30, 40:09:45, 41:10:00, 42:10:15, 43:10:30, 44:10:45, 45:11:00, 46:11:15, 47:11:30, 48:11:45, 49:12:00, 50:12:15, 51:12:30, 52:12:45, 53:13:00, 54:13:15, 55:13:30, 56:13:45, 57:14:00, 58:14:15, 59:14:30, 60:14:45, 61:15:00, 62:15:15, 63:15:30, 64:15:45, 65:16:00, 66:16:15, 67:16:30, 68:16:45, 69:17:00, 70:17:15, 71:17:30, 72:17:45, 73:18:00, 74:18:15, 75:18:30, 76:18:45, 77:19:00, 78:19:15, 79:19:30, 80:19:45, 81:20:00, 82:20:15, 83:20:30, 84:20:45, 85:21:00, 86:21:15, 87:21:30, 88:21:45, 89:22:00, 90:22:15, 91:22:30, 92:22:45, 93:23:00, 94:23:15, 95:23:30, 96:23:45

[244] [activity\\_56\\_s: From \*\*activity\\_55\\_s\*\*, what did you do?](#)

Categories: 1:Selling products and/or services in a shop, for self or household member, 2:Selling products and/or services door-to-door, for self or household member, 3:Sourcing and transporting products for trade e.g. day-old chicks, semen straws, feed, drugs etc, 4:Value -addition to the traded product e.g. processing meat, caring for the incubation process, grading etc, 5:Cleaning equipment and premises, 6:Communicating with suppliers, 7:Business group meetings (SACCO or ROSCA meetings, etc), 8:Business or self-employment activities (other than the agri-enterprise) for self or household member, 9:Work as employed, 10:Going to the bank, 11:Bookkeeping, 18:Sleeping and resting, 13:Eating and drinking, 14:Personal care, 15:School (incl. homework), 16:Cooking, 17:Domestic work (incl. fetching water, fuel), 12:Caring for children, 19:Caring for adults (sick, elderly), 20:Commuting (to/from work or school), 21:Traveling (not for work or school), 22:Exercising, 23:Social activities and hobbies, 24:Religious activities, 25:Weaving / sewing / textile care, 26:Farming, crop cultivation,, 27:Livestock raising (cattle, poultry, sheep, etc.), 28:Shopping / getting service (incl. health services), 29:Horticulture

[245] [endtime\\_56\\_s: Until what time? \*\*\(%hrs\\_56\\_s% hours %min\\_56\\_s% minutes\)\*\*](#)

Categories: 1:00:00, 2:00:15, 3:00:30, 4:00:45, 5:01:00, 6:01:15, 7:01:30, 8:01:45, 9:02:00, 10:02:15, 11:02:30, 12:02:45, 13:03:00, 14:03:15, 15:03:30, 16:03:45, 17:04:00, 18:04:15, 19:04:30, 20:04:45, 21:05:00, 22:05:15, 23:05:30, 24:05:45, 25:06:00, 26:06:15, 27:06:30, 28:06:45, 29:07:00, 30:07:15, 31:07:30, 32:07:45, 33:08:00, 34:08:15, 35:08:30, 36:08:45, 37:09:00, 38:09:15, 39:09:30, 40:09:45, 41:10:00, 42:10:15, 43:10:30, 44:10:45, 45:11:00, 46:11:15, 47:11:30, 48:11:45, 49:12:00, 50:12:15, 51:12:30, 52:12:45, 53:13:00, 54:13:15, 55:13:30, 56:13:45, 57:14:00, 58:14:15, 59:14:30, 60:14:45, 61:15:00, 62:15:15, 63:15:30, 64:15:45, 65:16:00, 66:16:15, 67:16:30, 68:16:45, 69:17:00, 70:17:15, 71:17:30, 72:17:45, 73:18:00, 74:18:15, 75:18:30, 76:18:45, 77:19:00, 78:19:15, 79:19:30, 80:19:45, 81:20:00, 82:20:15, 83:20:30, 84:20:45, 85:21:00, 86:21:15, 87:21:30, 88:21:45, 89:22:00, 90:22:15, 91:22:30, 92:22:45, 93:23:00, 94:23:15, 95:23:30, 96:23:45

[246] [activity\\_57\\_s: From \*\*activity\\_56\\_s\*\*, what did you do?](#)

Categories: 1:Selling products and/or services in a shop, for self or household member, 2:Selling products and/or services door-to-door, for self or household member, 3:Sourcing and transporting products for trade e.g. day-old chicks, semen straws, feed, drugs etc, 4:Value -addition to the traded product e.g. processing meat, caring for the incubation process, grading etc, 5:Cleaning equipment and premises, 6:Communicating with suppliers, 7:Business group meetings (SACCO or ROSCA meetings, etc), 8:Business or self-employment activities (other than the agri-enterprise) for self or household member, 9:Work as employed, 10:Going to the bank, 11:Bookkeeping, 18:Sleeping and resting, 13:Eating and drinking, 14:Personal care, 15:School (incl. homework), 16:Cooking, 17:Domestic work (incl. fetching water, fuel), 12:Caring for children, 19:Caring for adults (sick, elderly), 20:Commuting (to/from work or school), 21:Traveling (not for work or school), 22:Exercising, 23:Social activities and hobbies, 24:Religious activities, 25:Weaving / sewing / textile care, 26:Farming, crop cultivation,, 27:Livestock raising (cattle, poultry, sheep, etc.), 28:Shopping / getting service (incl. health services), 29:Horticulture

[247] [endtime\\_57\\_s: Until what time? \*\*\(%hrs\\_57\\_s% hours %min\\_57\\_s% minutes\)\*\*](#)

Categories: 1:00:00, 2:00:15, 3:00:30, 4:00:45, 5:01:00, 6:01:15, 7:01:30, 8:01:45, 9:02:00, 10:02:15, 11:02:30, 12:02:45, 13:03:00, 14:03:15, 15:03:30, 16:03:45, 17:04:00, 18:04:15, 19:04:30, 20:04:45, 21:05:00, 22:05:15, 23:05:30, 24:05:45, 25:06:00, 26:06:15, 27:06:30, 28:06:45, 29:07:00, 30:07:15, 31:07:30, 32:07:45, 33:08:00, 34:08:15, 35:08:30, 36:08:45, 37:09:00, 38:09:15, 39:09:30, 40:09:45, 41:10:00, 42:10:15, 43:10:30, 44:10:45, 45:11:00, 46:11:15, 47:11:30, 48:11:45, 49:12:00, 50:12:15, 51:12:30, 52:12:45, 53:13:00, 54:13:15, 55:13:30, 56:13:45, 57:14:00, 58:14:15, 59:14:30, 60:14:45, 61:15:00, 62:15:15, 63:15:30, 64:15:45, 65:16:00, 66:16:15, 67:16:30, 68:16:45, 69:17:00, 70:17:15, 71:17:30, 72:17:45, 73:18:00, 74:18:15, 75:18:30, 76:18:45, 77:19:00, 78:19:15, 79:19:30, 80:19:45, 81:20:00, 82:20:15, 83:20:30, 84:20:45, 85:21:00, 86:21:15, 87:21:30, 88:21:45, 89:22:00, 90:22:15, 91:22:30, 92:22:45, 93:23:00, 94:23:15, 95:23:30, 96:23:45

[248] [activity\\_58\\_s: From \*\*activity\\_57\\_s\*\*, what did you do?](#)

Categories: 1:Selling products and/or services in a shop, for self or household member, 2:Selling products and/or services door-to-door, for self or household member, 3:Sourcing and transporting products for trade e.g. day-old chicks, semen straws, feed, drugs etc, 4:Value -addition to the traded product e.g. processing meat, caring for the incubation process, grading etc, 5:Cleaning equipment and premises, 6:Communicating with suppliers, 7:Business group meetings (SACCO or ROSCA meetings, etc), 8:Business or self-employment activities (other than the agri-enterprise) for self or household member, 9:Work as employed, 10:Going to the bank, 11:Bookkeeping, 18:Sleeping and resting, 13:Eating and drinking, 14:Personal care, 15:School (incl. homework), 16:Cooking, 17:Domestic work (incl. fetching water, fuel), 12:Caring for children, 19:Caring for adults (sick, elderly), 20:Commuting (to/from work or school), 21:Traveling (not for work or school), 22:Exercising, 23:Social activities and hobbies, 24:Religious activities, 25:Weaving / sewing / textile care, 26:Farming, crop cultivation,, 27:Livestock raising (cattle, poultry, sheep, etc.), 28:Shopping / getting service (incl. health services), 29:Horticulture

[249] [endtime\\_58\\_s: Until what time? \*\*\(%hrs\\_58\\_s% hours %min\\_58\\_s% minutes\)\*\*](#)

Categories: 1:00:00, 2:00:15, 3:00:30, 4:00:45, 5:01:00, 6:01:15, 7:01:30, 8:01:45, 9:02:00, 10:02:15, 11:02:30, 12:02:45, 13:03:00, 14:03:15, 15:03:30, 16:03:45, 17:04:00, 18:04:15, 19:04:30, 20:04:45, 21:05:00, 22:05:15, 23:05:30, 24:05:45, 25:06:00, 26:06:15, 27:06:30, 28:06:45, 29:07:00, 30:07:15, 31:07:30, 32:07:45, 33:08:00, 34:08:15, 35:08:30, 36:08:45, 37:09:00, 38:09:15, 39:09:30, 40:09:45, 41:10:00, 42:10:15, 43:10:30, 44:10:45, 45:11:00, 46:11:15, 47:11:30, 48:11:45, 49:12:00, 50:12:15, 51:12:30, 52:12:45, 53:13:00, 54:13:15, 55:13:30, 56:13:45, 57:14:00, 58:14:15, 59:14:30, 60:14:45, 61:15:00, 62:15:15, 63:15:30, 64:15:45, 65:16:00, 66:16:15, 67:16:30, 68:16:45, 69:17:00, 70:17:15, 71:17:30, 72:17:45, 73:18:00, 74:18:15, 75:18:30, 76:18:45, 77:19:00, 78:19:15, 79:19:30, 80:19:45, 81:20:00, 82:20:15, 83:20:30, 84:20:45, 85:21:00, 86:21:15, 87:21:30, 88:21:45, 89:22:00, 90:22:15, 91:22:30, 92:22:45, 93:23:00, 94:23:15, 95:23:30, 96:23:45

[250] [activity\\_59\\_s: From \*\*activity\\_58\\_s\*\*, what did you do?](#)

Categories: 1:Selling products and/or services in a shop, for self or household member, 2:Selling products and/or services door-to-door, for self or household member, 3:Sourcing and transporting products for trade e.g. day-old chicks, semen straws, feed, drugs etc, 4:Value -addition to the traded product e.g. processing meat, caring for the incubation process, grading etc, 5:Cleaning equipment and premises, 6:Communicating with suppliers, 7:Business group meetings (SACCO or ROSCA meetings, etc), 8:Business or self-employment activities (other than the agri-enterprise) for self or household member, 9:Work as employed, 10:Going to the bank, 11:Bookkeeping, 18:Sleeping and resting, 13:Eating and drinking, 14:Personal care, 15:School (incl. homework), 16:Cooking, 17:Domestic work (incl. fetching water, fuel), 12:Caring for children, 19:Caring for adults (sick, elderly), 20:Commuting (to/from work or school), 21:Traveling (not for work or school), 22:Exercising, 23:Social activities and hobbies, 24:Religious activities, 25:Weaving / sewing / textile care, 26:Farming, crop cultivation,, 27:Livestock raising (cattle, poultry, sheep, etc.), 28:Shopping / getting service (incl. health services), 29:Horticulture

[251] [endtime\\_59\\_s: Until what time? \*\*\(%hrs\\_59\\_s% hours %min\\_59\\_s% minutes\)\*\*](#)

Categories: 1:00:00, 2:00:15, 3:00:30, 4:00:45, 5:01:00, 6:01:15, 7:01:30, 8:01:45, 9:02:00, 10:02:15, 11:02:30, 12:02:45, 13:03:00, 14:03:15, 15:03:30, 16:03:45, 17:04:00, 18:04:15, 19:04:30, 20:04:45, 21:05:00, 22:05:15, 23:05:30, 24:05:45, 25:06:00, 26:06:15, 27:06:30, 28:06:45, 29:07:00, 30:07:15, 31:07:30, 32:07:45, 33:08:00, 34:08:15, 35:08:30, 36:08:45, 37:09:00, 38:09:15, 39:09:30, 40:09:45, 41:10:00, 42:10:15, 43:10:30, 44:10:45, 45:11:00, 46:11:15, 47:11:30, 48:11:45, 49:12:00, 50:12:15, 51:12:30, 52:12:45, 53:13:00, 54:13:15, 55:13:30, 56:13:45, 57:14:00, 58:14:15, 59:14:30, 60:14:45, 61:15:00, 62:15:15, 63:15:30, 64:15:45, 65:16:00, 66:16:15, 67:16:30, 68:16:45, 69:17:00, 70:17:15, 71:17:30, 72:17:45, 73:18:00, 74:18:15, 75:18:30, 76:18:45, 77:19:00, 78:19:15, 79:19:30, 80:19:45, 81:20:00, 82:20:15, 83:20:30, 84:20:45, 85:21:00, 86:21:15, 87:21:30, 88:21:45, 89:22:00, 90:22:15, 91:22:30, 92:22:45, 93:23:00, 94:23:15, 95:23:30, 96:23:45

[252] [activity\\_60\\_s: From \*\*activity\\_59\\_s\*\*, what did you do?](#)

Categories: 1:Selling products and/or services in a shop, for self or household member, 2:Selling products and/or services door-to-door, for self or household member, 3:Sourcing and transporting products for trade e.g. day-old chicks, semen straws, feed, drugs etc, 4:Value -addition to the traded product e.g. processing meat, caring for the incubation process, grading etc, 5:Cleaning equipment and premises, 6:Communicating with suppliers, 7:Business group meetings (SACCO or ROSCA meetings, etc), 8:Business or self-employment activities (other than the agri-enterprise) for self or household member, 9:Work as employed, 10:Going to the bank, 11:Bookkeeping, 18:Sleeping and resting, 13:Eating and drinking, 14:Personal care, 15:School (incl. homework), 16:Cooking, 17:Domestic work (incl. fetching water, fuel), 12:Caring for children, 19:Caring for adults (sick, elderly), 20:Commuting (to/from work or school), 21:Traveling (not for work or school), 22:Exercising, 23:Social activities and hobbies, 24:Religious activities, 25:Weaving / sewing / textile care, 26:Farming, crop cultivation,, 27:Livestock raising (cattle, poultry, sheep, etc.), 28:Shopping / getting service (incl. health services), 29:Horticulture

[253] [endtime\\_60\\_s: Until what time? \*\*\(%hrs\\_60\\_s% hours %min\\_60\\_s% minutes\)\*\*](#)

Categories: 1:00:00, 2:00:15, 3:00:30, 4:00:45, 5:01:00, 6:01:15, 7:01:30, 8:01:45, 9:02:00, 10:02:15, 11:02:30, 12:02:45, 13:03:00, 14:03:15, 15:03:30, 16:03:45, 17:04:00, 18:04:15, 19:04:30, 20:04:45, 21:05:00, 22:05:15, 23:05:30, 24:05:45, 25:06:00, 26:06:15, 27:06:30, 28:06:45, 29:07:00, 30:07:15, 31:07:30, 32:07:45, 33:08:00, 34:08:15, 35:08:30, 36:08:45, 37:09:00, 38:09:15, 39:09:30, 40:09:45, 41:10:00, 42:10:15, 43:10:30, 44:10:45, 45:11:00, 46:11:15, 47:11:30, 48:11:45, 49:12:00, 50:12:15, 51:12:30, 52:12:45, 53:13:00, 54:13:15, 55:13:30, 56:13:45, 57:14:00, 58:14:15, 59:14:30, 60:14:45, 61:15:00, 62:15:15, 63:15:30, 64:15:45, 65:16:00, 66:16:15, 67:16:30, 68:16:45, 69:17:00, 70:17:15, 71:17:30, 72:17:45, 73:18:00, 74:18:15, 75:18:30, 76:18:45, 77:19:00, 78:19:15, 79:19:30, 80:19:45, 81:20:00, 82:20:15, 83:20:30, 84:20:45, 85:21:00, 86:21:15, 87:21:30, 88:21:45, 89:22:00, 90:22:15, 91:22:30, 92:22:45, 93:23:00, 94:23:15, 95:23:30, 96:23:45

## APPENDIX E — VARIABLES

[1] [fdeff\\_eng](#):

(shk\_fprod.InList(1,2) && shk\_fstk.InList(3,4) && shk\_fpch.InList(3,4))? "food production": (shk\_fprod.InList(3,4) && shk\_fstk.InList(1,2) && shk\_fpch.InList(3,4))? "food stocks": (shk\_fprod.InList(3,4) && shk\_fstk.InList(3,4) && shk\_fpch.InList(1,2))? "food purchases": (shk\_fprod.InList(1,2) && shk\_fstk.InList(1,2) && shk\_fpch.InList(3,4))? "food production and stocks": (shk\_fprod.InList(1,2) && shk\_fstk.InList(3,4) && shk\_fpch.InList(1,2))? "food production and purchases": (shk\_fprod.InList(3,4) && shk\_fstk.InList(1,2) && shk\_fpch.InList(1,2))? "food stocks and purchases": "food production, stocks, and purchases"

[2] [fdeff](#):

(shk\_fprod.InList(1,2) && shk\_fstk.InList(3,4) && shk\_fpch.InList(3,4))? "uzalishaji wa chakula": (shk\_fprod.InList(3,4) && shk\_fstk.InList(1,2) && shk\_fpch.InList(3,4))? "akiba ya chakula": (shk\_fprod.InList(3,4) && shk\_fstk.InList(3,4) && shk\_fpch.InList(1,2))? "manunuzi ya chakula": (shk\_fprod.InList(1,2) && shk\_fstk.InList(1,2) && shk\_fpch.InList(3,4))? "uzalishaji wa chakula na akiba ya chakula": (shk\_fprod.InList(1,2) && shk\_fstk.InList(3,4) && shk\_fpch.InList(1,2))? "uzalishaji wa chakula na manunuzi ya chakula": (shk\_fprod.InList(3,4) && shk\_fstk.InList(1,2) && shk\_fpch.InList(1,2))? "akiba na manunuzi ya chakula": "uzalishaji, akiba, na manunuzi ya chakula"

# LEGEND

## Legend and structure of information in this file

| Name of section                                                                                                                                                                                                                                                                                                                                                                                                                                                | Enabling condition for this section                                                                                                                                                                                                                                                                                                  | Type of question, scope | Variable name |
|----------------------------------------------------------------------------------------------------------------------------------------------------------------------------------------------------------------------------------------------------------------------------------------------------------------------------------------------------------------------------------------------------------------------------------------------------------------|--------------------------------------------------------------------------------------------------------------------------------------------------------------------------------------------------------------------------------------------------------------------------------------------------------------------------------------|-------------------------|---------------|
| SECTION 5: OTHER INCOME SOURCES                                                                                                                                                                                                                                                                                                                                                                                                                                | E s4_other_sources_which.Contains(98)                                                                                                                                                                                                                                                                                                |                         |               |
| <p><b>Duis aute irure dolor in reprehenderit in voluptate velit esse cillum dolore eu fugiat nulla pariatur?</b></p> <p>I This refers to family relations<br/>E s3_time_other &gt; 0<br/>V1 s4_re1_leaders_which.Contains(98)<br/>M1 Can not be itself<br/>V2 (s3_time_other_breeding_advice &lt;= (50 - s3_time_art_in-sem_advice))   s3_time_other_breeding_advice == 0<br/>M2 This person is not in the list<br/>F optioncode != s5_ignored_option_code</p> | <p>MULTI-SELECT<br/>SCOPE: PREFILLED</p> <p>01 <input type="checkbox"/> Community animal health workers</p> <p>02 <input type="checkbox"/> Private</p> <p>03 <input type="checkbox"/> Government</p> <p>04 <input type="checkbox"/> Livestock keepers association</p> <p>05 <input type="checkbox"/> NGO</p> <p>And 5 other [13]</p> | s4_re1_leaders_other    |               |
| <p><b>Additional information:</b></p> <p>"I" – Question instruction</p> <p>"E" – Enabling condition</p> <p>"V1" – Validation condition N°1</p> <p>"M1" – Message for validation N°1</p> <p>"F" – Filter in Categorical questions</p>                                                                                                                                                                                                                           | Link to full set in appendix                                                                                                                                                                                                                                                                                                         |                         |               |

### Breadcrumbs

| Type or roster                        | Roster Title                                               |
|---------------------------------------|------------------------------------------------------------|
| CHAPTER 3 IDENTIFICATION /<br>Roster: | <b>LEADER RELATION DETAILS</b><br>generated by fixed list: |
| 01                                    | Ward Livestock Officer                                     |
| 02                                    | Village Livestock Officer                                  |
| 99                                    | Other (specify)                                            |
|                                       | List items                                                 |
