# Supplementary material
Source: Research Square preprint supplement (doi:10.21203/rs.3.rs-8918389/v1)
Supplement: Supplementary file 6 [file 80a78abd24ec1d62ad66054f.docx]

#### **Description of the FT study dataset.**

This document provides an overview of the Field Technician (FT) datasets and outlines the process for merging them. [The FT questionnaire](https://docs.google.com/spreadsheets/d/1HhDRqzziI-KVUqwLJQK3I-kJ-ClyzkKSh1iBjYNSDfQ/edit?usp=sharing) was developed in 2022, and programmed on Kobo, with data collection starting in August of the same year. However, challenges related to data quality and changes in FT personnel were identified during the initial phase of data collection. To address these issues, OPM, ILRI, and CEVA conducted a refresher training in July/August 2023. This training focused on reinforcing data collection protocols and introduced a performance-based bonus mechanism to motivate FTs to enhance data quality and ensure compliance with established procedures.

Below is a description of the datasets and guidance on how they can be merged.

#### **Dataset 1: PREVENT_FT_maindata**

This is the primary dataset, containing data from 1,182 unique households/customers. To maintain confidentiality, all personally identifiable information, such as names, has been removed. The dataset includes key information on:

- Chicken Management: Type and number of chickens kept at the time of each visit.
- Chicken Sales and Mortality: Data on chicken sales and records of chicken deaths.
- Gender-related Information: Responses to gender-related questions.

Each row in the dataset represents a single household visit, with the date of the visit recorded under the variable *interview_date*. For identification and merging purposes *hh_id* serves as a unique identifier for each household. Variable *key* is a unique identifier for each record in the dataset, making it distinct across all entries. This dataset can be merged with other related datasets using variable *key* as the linking identifier.

#### **Dataset 2: PREVENT_FT_HH_members**

This dataset contains roster information on household members at the household level. For each household, there is data on at least two members of opposite sexes. This information is only asked once during the first visit. The dataset includes the following key information:

- Demographic Details: Age and sex of household members.
- Educational Background: Information on the education level of each member.

The dataset is structured in long format, where each row represents an individual household member. To merge this with main dataset, use variable *key* as the unique identifier.

#### **Dataset 3: PREVENT_FT_batchlog**

This dataset contains information on vaccinated day-old chicks (VDOCs) purchased by households. It is a roster that opens when a household reports buying VDOCs from a registered hatchery, with each row representing a batch of VDOCs purchased. For each batch, the dataset captures the number of chickens bought, disaggregated by type. The dataset is in long format, allowing multiple entries per household, and can be merged with the main dataset using the variable *key.*
