# Supplementary material
Source: Research Square preprint supplement (doi:10.21203/rs.3.rs-8918389/v1)
Supplement: Supplementary file 7 [file 8f4541795c21b2378ce6d9e0.pdf]

## Impact Evaluation Evaluation Matrix

| #                                                                                    | Overarching / Principal Evaluation Question                                                                    | #    | Sub-Evaluation Question                                                                        | Indicators                                                                                    | Data Source(s) | EPIs <sup>1</sup> |
|--------------------------------------------------------------------------------------|----------------------------------------------------------------------------------------------------------------|------|------------------------------------------------------------------------------------------------|-----------------------------------------------------------------------------------------------|----------------|-------------------|
| <b>Effectiveness: to what extent is PREVENT on course to achieve its objectives?</b> |                                                                                                                |      |                                                                                                |                                                                                               |                |                   |
| E1                                                                                   | To what extent has PREVENT achieved its objectives?                                                            | E1.1 | To what extent has PREVENT supported better flock management?                                  | Flock management standard index                                                               | QIE Study      | EPI 4             |
|                                                                                      |                                                                                                                |      |                                                                                                | Poultry mortality rate                                                                        | QIE Study      | EPI 5             |
|                                                                                      |                                                                                                                |      |                                                                                                | Eggs laid per laying hen                                                                      | QIE Study      | EPI 5             |
| <b>Impact: what difference is PREVENT Making?</b>                                    |                                                                                                                |      |                                                                                                |                                                                                               |                |                   |
| I1                                                                                   | To what extent do SSPs have improved incomes?                                                                  | I1.1 | How many households report improved incomes as a result of PREVENT?                            | Household income (cash poultry income; net poultry income; and net household income)          | QIE Study      | EPI 1             |
| I2                                                                                   | To what extent has PREVENT supported SSPs to intensify production?                                             | I2.1 | How many households report increased production intensity?                                     | Average number of chickens purchased                                                          | QIE Study      | EPI 2             |
|                                                                                      |                                                                                                                |      |                                                                                                | Average flock size                                                                            | QIE Study      | EPI 2             |
|                                                                                      |                                                                                                                |      |                                                                                                | % households who move from one segment to another (descriptive)                               | QIE Study      | EPI 2             |
|                                                                                      |                                                                                                                |      |                                                                                                | % households who purchase VDOCs                                                               | QIE Study      | n/a               |
| I3                                                                                   | To what extent has PREVENT supported the empowerment of women producers?                                       | I3.1 | To what degree has PREVENT supported the empowerment of women producers? (BASED ON WELI INDEX) | % of women producers who remain in control of poultry production between baseline and endline | QIE Study      | EPI 3             |
|                                                                                      |                                                                                                                |      |                                                                                                | Change in average Women's Empowerment in Livestock Index (WELI)                               | QIE Study      | EPI 3             |
|                                                                                      |                                                                                                                |      |                                                                                                | % of women with input in livestock decisions                                                  | QIE Study      | EPI 3             |
|                                                                                      |                                                                                                                |      |                                                                                                | % of women with asset ownership                                                               | QIE Study      | EPI 3             |
|                                                                                      |                                                                                                                |      |                                                                                                | % of women with control and use of income                                                     | QIE Study      | EPI 3             |
|                                                                                      |                                                                                                                |      |                                                                                                | % of women with group membership                                                              | QIE Study      | EPI 3             |
|                                                                                      |                                                                                                                |      |                                                                                                | Extent and control of women's work time                                                       | QIE Study      | EPI 3             |
| <b>Sustainability: will PREVENT leave a lasting impact?</b>                          |                                                                                                                |      |                                                                                                |                                                                                               |                |                   |
| S1                                                                                   | To what extent does the PREVENT project support a lasting market for VDOCs in the countries in which it works? | S1.1 | To what extent is SSP production sustainable?                                                  | % of SSPs who remain in poultry production (descriptive)                                      | QIE Study      | EPI 6             |

<sup>1</sup> EPI: End of Project Indicator
