# Supplementary material
Source: Research Square preprint supplement (doi:10.21203/rs.3.rs-8918389/v1)
Supplement: Supplementary file 8 [file adea48ea7782804a269c107d.pdf]

## Adequacy definition of the 13 Women's Empowerment in Livestock (WELI) indicators

| Domain                     | Indicator                                                      | Explanation                                                                                                            | Definition of adequacy                                                                                                                                                                                                                                                                                  |
|----------------------------|----------------------------------------------------------------|------------------------------------------------------------------------------------------------------------------------|---------------------------------------------------------------------------------------------------------------------------------------------------------------------------------------------------------------------------------------------------------------------------------------------------------|
| <b>Intrinsic agency</b>    | <b>Autonomy in Income</b>                                      | It is a measure of the internal and external motivations that determine a person's decisions regarding income,         | Threshold: Relative Autonomy Index score $\geq 1$ ; Respondent is more motivated by own values than by coercion or fear of others' disapproval                                                                                                                                                          |
|                            | <b>Self-efficacy</b>                                           | Belief in one's own abilities to succeed in certain situations or accomplish tasks                                     | Threshold: Adequate if "Agree" or greater on average with 8 self-efficacy questions.                                                                                                                                                                                                                    |
|                            | <b>Attitudes about intimate partner violence against women</b> | What is your opinion on the acceptability of a husband beating his wife in different situations?                       | Threshold: Adequate if NO to all Five statements                                                                                                                                                                                                                                                        |
|                            | <b>Respect among household members</b>                         | How do you feel about some of other people in your household or family group and how do you think they feel about you? | Threshold: Adequate if respondent respects, trust and can disagree with relation and vice-versa                                                                                                                                                                                                         |
| <b>Instrumental agency</b> | <b>Input in productive decisions</b>                           | What decisions are you a part of?<br>What is your role in making these decisions?                                      | Threshold: Meets at least ONE of the following conditions for ALL of the activities they participate in<br>1. Makes related decision solely,<br>2. Makes the decision jointly and has at least some input into the decisions<br>3. Feels could make decision if wanted to (to at least a MEDIUM extent) |

|  |                                                             |                                                                                                                                                              |                                                                                                                                                                                                                                                                                                                                                                                                                                                                                         |
|--|-------------------------------------------------------------|--------------------------------------------------------------------------------------------------------------------------------------------------------------|-----------------------------------------------------------------------------------------------------------------------------------------------------------------------------------------------------------------------------------------------------------------------------------------------------------------------------------------------------------------------------------------------------------------------------------------------------------------------------------------|
|  | <p><b>Input in productive decisions: Livestock</b></p>      | <p>What decisions are you a part of?<br/>What is your role in making these decisions?</p>                                                                    | <p>Threshold: Meets at least ONE of the following conditions for ALL of the activities they participate in</p> <ol style="list-style-type: none"> <li>1. Makes related decision solely,</li> <li>2. Makes the decision jointly and has at least some input into the decisions</li> <li>3. Feels could make decision if wanted to (to at least a MEDIUM extent)</li> </ol>                                                                                                               |
|  | <p><b>Ownership of land and other assets</b></p>            | <p>Do you own any assets? Do you own them solely or jointly</p>                                                                                              | <p>Threshold: Owns, either solely or jointly, at least ONE of the following:</p> <ol style="list-style-type: none"> <li>1. At least THREE assets</li> <li>2. Land</li> </ol>                                                                                                                                                                                                                                                                                                            |
|  | <p><b>Access to and decisions on financial services</b></p> | <p>Do you contribute to household decisions on credit (e.g. taking out a loan)? Can you get a loan if you wanted to?</p>                                     | <p>Threshold: Meets at least ONE of the following conditions:</p> <ol style="list-style-type: none"> <li>1. Belongs to a household that used a source of credit in the past year AND participated in at least ONE sole or joint decision about it</li> <li>2. Belongs to a household that did not use credit in the past year but could have if wanted to from at least ONE source</li> <li>3. Has access, solely or jointly, to a financial account OR mobile money account</li> </ol> |
|  | <p><b>Control over use of income</b></p>                    | <p>Do you have input in decisions about how to use income generated from selling goods and/or services to consumers/interacting with consumers directly?</p> | <p>Threshold: Meets BOTH the following conditions</p> <ol style="list-style-type: none"> <li>1. Has input in decisions related to how to use BOTH income and output from ALL of the agricultural activities they participate in</li> <li>2. Has input in decisions related</li> </ol>                                                                                                                                                                                                   |

|                          |                                         |                                                                                                                |                                                                                                                                                                                                                                                                                          |
|--------------------------|-----------------------------------------|----------------------------------------------------------------------------------------------------------------|------------------------------------------------------------------------------------------------------------------------------------------------------------------------------------------------------------------------------------------------------------------------------------------|
|                          |                                         |                                                                                                                | to income from ALL non-agricultural activities they participate in, unless no decision was made                                                                                                                                                                                          |
|                          | <b>Work Balance</b>                     | How many hours a day do you work? How much of that time is spent on care giving for children?                  | Threshold: Adequate if respondent works less than 10.5 hours per day                                                                                                                                                                                                                     |
|                          | <b>Visiting Important</b>               | How often do you generally visit places                                                                        | Threshold: Adequate if respondent works meets one or more of the following conditions:<br>1. Visits at least TWO locations at least ONCE PER WEEK of [city, market, family/relative], or<br>2. Visits at least ONE location at least ONCE PER MONTH of [health facility, public meeting] |
| <b>Collective agency</b> | <b>Group membership</b>                 | Are you a member of a group in your community?                                                                 | Threshold: Adequate if respondent is a member of at least one group in the community                                                                                                                                                                                                     |
|                          | <b>Membership in influential groups</b> | Are you part of a group that is influential in your community? How influential is your group in the community? | Threshold: Adequacy if active member of at least ONE group that can influence the community to at least a MEDIUM extent                                                                                                                                                                  |
